# Supplementary material for: Numerous Transitions of Sex Chromosomes in Diptera
Source: PLoS Biol. 2015 Apr 16;13(4):e1002078. doi: 10.1371/journal.pbio.1002078 (PMC4400102; doi:10.1371/journal.pbio.1002078)
Supplement: S3 Data — (XLSX) [file pbio.1002078.s003.xlsx]

## Sheet: Sheet1
This worksheet contains the expression values for each of the tissues examined, as well as their corresponding expression in several D. melanogaster tissues
All D. melanogaster expression values were obtained from: http://www.fruitfly.org/sequence/download.html#modencode_expression_scores
gene	Gene name (using the D. melanogaster nomenclature)
Fcov	Female genomic coverage depth of the scaffold where the gene is located
Mcov	Male genomic coverage depth of the scaffold where the gene is located
chrom	D. melanogaster chromosome that the scaffold containing the gene was assigned to, based on its gene content
DFbody	FPKM for D. melanogaster female, whole-body (TAKEN FROM MODENCODE)
DMbody	FPKM for D. melanogaster male, whole-body (TAKEN FROM MODENCODE)
DFhead	FPKM for D. melanogaster female, head (TAKEN FROM MODENCODE)
DMhead	FPKM for D. melanogaster male, head (TAKEN FROM MODENCODE)
DOvary	FPKM for D. melanogaster female, ovary (TAKEN FROM MODENCODE)
Dtestis	FPKM for D. melanogaster male, testis (TAKEN FROM MODENCODE)
Fbody	FPKM for female, whole-body
Mbody	FPKM for male, whole-body
Fhead	FPKM for female, head
Mhead	FPKM for male, head
Ovary	FPKM for female, ovary
Testis	FPKM for male, testis
Fantenna	FPKM for female, antenna
Mantenna	FPKM for male, antenna
Figures using this data: Fig. 3, Fig. 4, Fig. 5, Fig. S7

## Sheet: E.hians
gene	Fcov	Mcov	chrom	DFbody	DMbody	DFhead	DMhead	DOvary	Dtestis	Fbody	Mbody	Fhead	Mhead	Ovary	Testis
128up	18	14	2R	38.6798	16.6613	13.609	10.563	77.9516	76.6125	20.5208	36.8945	11.8484	11.1222	37.0511	34.1855
14-3-3zeta	16	8.6	2R	30.5376	25.7217	76.2853	100.539	48.6616	11.3422	1534.96	1240.53	1073.42	1277.2	1674.42	769.268
140up	16	8.8	3R	7.02224	3.83363	3.64108	5.22436	14.7333	7.49638	12.7507	5.35719	12.3612	12.4677	11.6093	1.33503
18w	18	11	2R	4.487	5.48968	9.7792	13.5263	2.79706	1.11498	5.85152	2.22842	10.2527	10.4316	8.21172	1.77476
312	18	6.2	3L	2.99806	3.83704	0.734329	1.74999	3.37925	15.6395	19.8887	18.4998	13.2463	13.4821	9.57049	18.1764
4EHP	16	11	3R	1.25793	1.34229	13.6658	19.6295	10.5855	2.23701	17.766	14.0159	12.4949	10.2162	27.0458	14.9163
5-HT1A	15	10	2R	0.0148059	0.119081	0.526582	0.85999	0.00180979	0.0218543	1.46947	1.36567	12.252	13.0066	0	0.638073
5PtaseI	33	16	3R	3.62181	1.37221	3.86258	5.5567	6.46438	0.212691	23.0401	32.9018	26.2665	29.015	8.87049	11.7046
A16	20	13	2L	15.5605	8.81531	13.3324	16.9588	54.7153	82.8094	5.89206	41.5597	13.9553	11.321	16.1964	56.4884
A2bp1	9.2	2.7	3L	0.173936	7.08658	1.33421	2.64962	0.310745	16.61	1.5719	3.08225	15.625	5.97731	3.67772	8.1905
ABCB7	23	6.6	3L	10.9242	13.0114	6.66551	9.80507	12.5919	21.4082	34.4619	14.6014	51.7018	45.3238	36.9655	6.30143
ACC	13	8.9	2R	19.4521	30.4053	43.949	45.5194	5.71204	8.19945	21.3017	21.0184	15.1598	18.9145	34.979	8.26657
ACXD	18	7	3L	1.11018	3.29416	0.0499641	0.220447	0.0668054	1.20411	3.73089	53.9401	0.861425	2.76647	16.8656	69.5283
AGO2	28	15	3L	28.726	22.5249	48.891	49.4802	46.3269	25.4707	20.8885	61.1757	55.4537	51.878	64.5843	174.432
AIF	15	8.6	2L	24.2522	22.958	3.55607	7.18157	53.586	52.9357	3.40663	166.749	4.81125	6.85901	20.6201	362.294
ALiX	17	13	3R	20.2494	25.5193	10.4341	15.3079	20.256	37.0159	37.2493	72.1932	34.5176	49.8965	68.4835	72.8177
AP-1gamma	10	6.4	X	13.3856	6.29172	13.0426	17.3172	24.0109	3.14987	11.7399	10.9297	25.0061	26.4068	37.198	11.0444
AP-1sigma	17	9.7	3R	7.93336	4.20003	18.7839	29.2595	12.1162	4.57882	42.923	71.1526	31.585	19.8103	39.689	28.5452
AP-2	23	6.5	3L	0.0178225	0.0922472	0.706264	0.884708	0.00170683	0.0356131	2.0806	0.777412	7.24831	4.46953	0	0
AP-50	18	9.6	3R	26.8248	15.7224	9.38606	15.6745	27.4243	34.2324	33.839	35.9738	44.4306	46.4764	35.9536	28.9552
APP-BP1	23	6.1	3L	7.24896	16.0197	2.96169	3.78434	9.93727	58.6781	4.46899	8.33074	6.59224	7.31401	12.0381	10.7318
AQP	12	8	2R	3.03756	22.2103	0.481252	0.757882	0.00762158	3.05592	107.423	198.013	200.302	231.323	12.6917	220.529
ARY	17	7.4	2R	0	2.11063	4.10787	9.75927	11.5967	8.03826	21.4293	286.078	17.3353	26.1412	11.5994	396.216
ASPP	25	16	2R	0.293648	0.717224	1.56377	2.2715	0.154538	0.218939	3.96806	11.4412	11.0274	10.071	5.10063	40.3523
ATPCL	23	12	2R	31.9973	33.1843	24.7706	45.5931	30.5849	8.62734	94.3828	48.7559	69.4821	72.0348	111.81	17.7102
ATPsyn-b	20	6.2	3L	176.01	286.262	91.5146	129.736	73.7068	241.249	2320.13	975.448	1746.99	1872.52	759.672	92.5
ATPsyn-d	9.3	5.9	3R	168.144	280.331	277.851	204.756	190.739	180.736	2633.12	1151.95	3710.8	3667.36	1559.79	269.548
ATPsyn-gamma	20	12	3R	170.514	299.755	74.2229	79.8216	78.9053	65.2423	2344.55	1078.67	1645.73	2009.99	867.916	59.6206
ATbp	15	9.6	X	3.36218	1.32782	11.9282	17.0746	6.27729	2.11015	1.77973	3.85683	4.8043	4.75341	6.589	12.6243
Aats-ala	31	18	2L	51.8592	12.3908	7.49904	8.22763	48.59	20.8139	26.0239	19.4474	16.2102	16.0846	52.6579	15.6305
Aats-arg	27	14	X	23.8854	4.82002	4.92414	4.98373	34.6732	2.66792	20.8908	18.0752	13.2302	15.6557	26.1256	16.3729
Aats-asn	22	15	2R	60.4008	18.6879	13.5617	14.8189	48.4013	25.5757	23.2168	14.7038	23.4991	20.329	13.7716	9.98371
Aats-cys	2	2.2	2R	17.9378	4.52607	2.61576	4.12665	19.8911	8.46152	4.7339	9.9618	5.62642	4.8316	19.9695	14.5759
Aats-glupro	14	9.5	3R	27.2394	7.10092	7.16852	8.54454	39.5149	4.92795	19.7613	36.9453	21.3718	21.0778	42.5147	45.6895
Aats-gly	27	8.5	3L	40.5573	11.7002	8.56341	10.9553	44.7457	19.3033	37.8846	16.6186	24.7886	21.0916	68.0164	15.5274
Aats-his	12	8.6	3R	20.3374	6.09696	5.66331	6.39257	18.6952	7.4789	31.7636	20.9966	36.6832	39.0296	40.6093	23.3257
Aats-ile	21	5.8	3L	34.1424	7.08613	7.80843	10.61	51.0901	4.72219	7.87782	7.46279	6.98092	6.64672	16.0282	6.93783
Aats-met	11	8	3R	1.53088	1.02896	0.290889	0.504397	1.05164	1.14342	3.29524	6.12341	4.71383	3.96573	5.91487	9.98814
Aats-ser	13	11	3R	9.17952	4.22931	2.20886	4.05278	16.203	9.04694	34.0194	69.8269	22.4721	17.0195	31.9984	31.1729
Aats-thr	14	13	2L	47.7394	15.2115	20.1339	25.0138	54.3287	31.8058	44.6849	35.9175	47.4288	55.2794	82.2547	43.5162
Aats-tyr	22	5.7	3L	41.1556	15.3817	19.4827	19.1482	48.8193	30.3616	15.6566	7.10626	14.0539	13.2066	35.2981	4.55779
Abi	19	13	3R	14.7165	8.58435	20.2603	23.3897	59.8678	15.7913	26.0237	13.4472	31.0314	25.9235	34.2533	21.4251
Abl	28	10	3L	3.83796	1.51283	3.23535	5.06593	8.0556	1.4203	2.45219	2.92716	10.4786	7.80353	7.44664	4.14543
Ac13E	27	18	X	0.499729	1.01718	1.61786	2.37026	0.425278	0.189739	2.33663	2.54791	4.1843	6.40135	4.72886	1.55587
Ac76E	23	8.1	3L	0.341106	1.4397	1.14261	1.36811	0.0302483	0.15077	6.94026	4.70418	14.5984	17.9799	8.7492	0.447446
Ac78C	25	7	3L	0.0885794	0.296744	0.306508	0.408882	0.0197937	0.0942252	2.12258	2.09516	0.564389	1.88427	6.08278	0.426429
AcCoAS	17	5.1	3L	21.6715	26.9598	46.9241	72.6774	7.48195	2.44233	7.62688	14.0895	32.9405	26.1257	25.1307	15.2246
Acer	18	9.9	2L	21.5692	28.4942	25.5458	27.038	13.9628	57.837	10.1247	19.4971	115	184.626	14.7721	13.0596
Acf1	22	14	3R	22.0847	3.75294	8.13411	11.9173	92.0757	8.73867	3.07286	13.9437	10.3032	10.4306	9.61633	31.9123
Ack	20	11	3L	8.51578	13.1904	6.17042	8.81484	12.8786	47.4181	23.8219	23.1663	23.3761	21.0183	14.6883	30.8124
Acon	21	14	2L	125.289	274.172	117.221	135.985	88.7784	15.7896	1153.09	655.881	962.569	883.487	353.39	206.42
Acp1	16	9.5	2L	0.972654	4.44085	15.6045	14.2565	0.00866415	0.866778	1001.1	842.338	7712.71	6246.39	577.425	47.0185
Acp65Aa	14	5.3	3L	0.668899	0.756729	0.513596	0.192987	0.0247682	0	503.601	114.288	14.2059	24.1856	252.993	24.6632
Act79B	12	8.1	2L	32.5251	319.731	48.148	42.9892	0.150596	3.44398	0.663091	1.84709	1.52181	2.79006	1.85424	6.11497
Actn	15	6.4	X	12.4807	20.0922	16.9232	15.9334	26.8974	2.51573	667.533	293.686	1241.32	1050.66	168.648	7.96052
Actr13E	19	12	X	18.6242	8.56321	2.02022	3.35473	11.0445	2.37074	22.0923	25.6584	17.9484	19.3212	8.2397	26.8012
Ada2b	11	8.9	X	25.5356	3.31109	3.59485	6.96747	59.9859	6.98483	11.5279	3.32983	20.617	17.5486	5.01702	0.246229
Adam	11	4.7	2R	30.3433	18.2802	69.2011	76.9625	81.0752	57.989	66.2596	356.302	64.3265	64.0378	107.455	768.782
Adar	15	9.6	X	2.18153	2.18378	5.40901	9.70033	3.23801	0.292517	3.35257	3.29571	45.7628	24.5824	4.7925	5.26476
Adf1	14	6.5	2R	5.43798	2.79428	3.56839	5.10127	13.831	2.2394	14.5531	40.0918	21.3411	15.8205	24.1887	78.9637
Adgf-A	21	7.6	3L	1.88331	9.49727	0.849137	1.36183	1.45235	15.2644	48.4015	14.074	1.15902	3.26469	65.5954	1.38379
Adgf-C	18	12	3R	0.38705	3.63376	3.00826	4.21149	0.0726839	2.47187	2.0841	0.6419	3.48694	3.09192	0.691999	0
Adk1	18	10	3L	4.15569	21.3998	9.81015	15.5403	3.61999	55.8135	0	182.661	0.203301	3.76305	0	243.016
Adk3	8.8	5.1	3R	6.64084	28.1296	3.51	7.37845	10.2028	182.423	62.4619	212.353	162.558	209.987	325.552	242.434
AdoR	12	7.6	3R	0.101677	0.375242	0.453972	0.536292	0.0246652	0.0904246	1.07427	1.11384	3.98352	2.91875	6.51657	0.729172
Ady43A	21	11	2R	7.37329	9.46541	10.8412	11.5019	16.6335	5.51793	31.4539	140.157	28.1921	22.9182	17.4009	108.774
Aef1	17	5.7	3L	20.6871	4.48992	21.6454	25.1651	81.8833	4.84899	2.47629	2.96568	5.76527	4.57052	17.1871	15.0572
Ag5r2	16	9.2	X	48.7358	27.4966	0.0415798	0.0200287	0.0223488	10.6799	1097.77	197.058	18.2698	113.665	311.785	12.7502
Ahcy13	27	18	X	130.066	21.7071	23.679	26.6356	147.514	42.2684	198.075	66.7818	276.927	350.469	716.614	53.2942
Ahcy89E	16	8.4	2L	1.22955	3.97165	1.73111	2.27295	0.0421708	0.154991	0	91.4695	0	0.83546	0	38.9572
Ak6	12	5.9	2R	7.70953	1.23722	2.3481	3.03679	15.0191	2.27504	33.9177	31.473	7.64635	9.91864	34.6226	41.1665
Alas	29	14	2R	28.0935	98.3677	58.9699	66.8236	39.1709	101.687	449.695	392.397	372.275	379.911	310.742	406.668
Ald	17	8.8	3R	55.5762	103.203	120.493	156.395	32.4788	80.5488	4162.71	2192.73	2236.71	2135.15	905.735	359.486
Aldh	11	6.6	2L	60.0497	92.6533	87.8369	100.475	53.3051	314.189	116.354	55.4846	49.2716	55.5015	85.2371	20.7731
Alg-2	15	8.7	3R	4.61508	1.47853	2.14214	3.82674	7.57077	1.98747	146.785	133.478	87.8058	118.299	133.215	47.0757
Alk	18	10	2R	0.313913	1.99627	11.7228	18.705	0.00739921	0.0260088	1.41791	0.508703	9.86637	5.99855	0.722608	0.034285
Ama	22	13	3R	0.265865	0.188038	0.0113963	0.0666194	0.0247751	0.292588	6.5746	498.696	3.4001	7.9161	13.2931	441.962
Amun	21	13	X	36.6786	11.1859	90.3223	114.886	206.733	33.3592	11.4952	8.89374	25.0301	19.9288	42.2642	16.6781
Ance	21	12	2L	13.424	42.0853	6.38441	11.3791	0.677287	110.937	84.4245	171.518	36.8037	80.0472	294.132	114.553
Ance-4	11	8.1	2R	7.39672	7.75468	26.3628	22.7056	0.128315	1.36754	55.3634	17.3758	35.9858	66.0162	82.7747	2.81406
AnnIX	13	8.9	3R	15.4262	20.5274	11.5517	16.3323	9.92286	12.4472	503.387	335.391	218.457	363.928	334.332	44.943
AnnX	15	6.3	X	18.2959	32.1669	23.0942	24.8732	12.4134	27.0355	174.703	53.8896	105.006	150.333	58.5677	6.4771
Anxb11	15	10	X	4.8295	5.96096	8.83263	11.4152	5.42969	12.4463	28.4419	16.0266	32.9185	41.828	51.3536	8.885
Apc10	17	9.8	2R	8.83203	4.48838	3.48236	5.19619	21.4622	15.5953	12.6017	13.0499	2.62118	2.42587	7.7501	6.3265
ApepP	26	15	2L	23.573	10.8838	1.8505	4.81531	43.9359	21.155	25.1329	66.7754	17.6748	18.0059	53.0695	30.0988
Appl	19	12	X	0.279776	1.33795	16.4466	28.7365	2.49811	1.68257	6.11927	3.82799	100.898	63.3274	1.0259	0.100572
Aprt	18	5.2	3L	11.7396	4.54327	6.71214	7.2267	14.8036	7.05921	4.61745	7.94029	8.13316	5.42711	20.3282	18.8071
Aps	12	4.7	3L	34.5314	13.2329	40.8748	47.016	184.26	28.1284	17.5195	17.8114	61.2618	34.9324	55.56	62.4072
Arc2	20	10	2R	5.73709	1.42419	1.10634	1.88689	12.1113	1.49135	7.37326	7.53409	10.6953	16.299	26.1097	1.63095
Arc42	28	12	3R	20.5655	12.0874	9.91446	9.63037	28.3567	13.3927	104.329	54.4609	68.3215	98.5084	128.384	4.29697
Arf72A	17	6.3	3L	19.8931	14.1895	13.138	19.9002	50.905	58.3029	10.2784	43.9378	15.2286	10.573	26.3257	54.7877
Arf79F	22	5.9	3L	52.604	28.0653	87.6336	118.926	200.742	31.1912	377.754	244.333	137.671	110.537	287.187	82.5081
Argk	18	6	3L	22.2194	49.728	39.3218	55.6813	14.7439	26.3257	4052.73	2206.13	3565.33	4045.99	1370.19	163.155
Arp11	26	15	X	13.6786	11.0821	4.15853	5.5497	8.16859	15.6509	27.091	17.1261	21.6763	25.4776	26.0487	11.4569
Arp66B	19	5.1	3L	26.9955	9.72456	6.7933	8.78424	32.9726	11.6486	27.4567	59.7625	15.2308	18.299	34.9127	20.9206
Arr1	10	6.6	2L	63.3338	268.372	979.553	1452.53	0.0957351	10.0031	163.437	103.557	1211.96	1776.37	0.200574	0.144311
Arr2	26	7.7	3L	122.631	429.476	1819.97	2416.18	0.238095	4.45414	617.093	225.14	1276.59	1990.38	0.566896	0
Ars2	20	12	2R	22.3505	6.29516	22.381	27.7541	115.731	5.68024	32.0871	20.6943	39.6162	47.035	48.9299	18.4946
Art1	23	12	3R	78.6616	8.9591	4.82297	5.93154	86.6722	17.4397	42.6997	40.0676	18.4715	19.645	81.3089	60.3656
Art4	26	16	3R	19.0521	1.57478	3.55126	4.6053	50.0048	0.909739	8.06655	18.4971	8.75309	8.35094	12.1676	22.7685
Art7	17	5.3	2R	9.89537	5.1058	1.80302	2.94377	10.0381	7.53505	2.86006	2.35691	3.0581	4.02433	7.20203	1.76385
Asator	21	11	4	1.40859	2.03707	12.3394	19.9145	10.2878	0.21193	43.9794	27.7691	72.3886	79.1584	9.13489	9.5465
Asph	13	7.9	2R	1.99945	9.21626	13.306	14.1523	3.16088	4.6981	69.9426	25.5516	290.067	217.874	17.5912	0.546004
Ast	16	11	3R	0.331907	1.57306	4.09681	6.93471	0.0163208	0.479402	24.3088	159.797	5.547	13.9038	8.08144	68.5461
Atac1	24	6.8	U	3.62074	1.94944	3.70374	4.58341	16.2069	4.06558	6.02344	6.4995	7.81088	4.87018	13.3633	4.90458
Atet	30	17	2L	2.14607	2.73803	6.46574	8.87746	1.32333	1.36395	26.7852	11.3371	38.8666	45.84	16.3307	2.78217
Atf-2	19	9.3	2R	5.25341	6.7116	21.7532	31.3288	2.97005	3.97306	17.076	7.51704	42.0725	48.3248	3.49892	1.50215
Atg1	24	7.3	3L	4.32884	2.05604	2.65981	3.85047	6.7906	0.713818	25.0832	11.9852	28.2615	26.1858	33.322	8.75634
Atg13	21	12	3R	14.5488	6.94179	9.1637	12.5121	48.8946	11.015	2.30644	4.00769	20.9017	12.3084	27.5678	5.63701
Atg18	18	14	3R	10.4935	8.15208	5.08416	7.754	10.9461	3.27942	34.684	23.0272	42.0664	63.869	28.8071	0.614245
Atg2	30	17	3L	12.1454	9.29542	7.46475	8.32026	16.5798	7.61557	29.2661	14.6772	24.6852	26.2149	34.2899	8.24974
Atg5	27	16	X	1.59009	0.607522	0.622732	1.23283	1.52399	0.0807609	55.9968	21.3039	36.3649	36.5466	70.7665	10.4961
Atg6	20	11	3R	7.63272	6.61808	7.00598	7.53839	11.8957	14.3051	12.1184	9.66837	16.5859	16.5585	20.6786	12.9022
Atg7	27	16	2R	6.54399	3.38426	1.14747	1.54819	7.12171	1.45397	11.7053	3.55646	11.3055	13.0261	11.3288	0.996603
Atg8a	15	7	X	26.0269	40.5566	91.7364	114.814	40.2465	20.5124	2000.81	1132.55	694.41	683.684	664.861	349.172
Atg9	25	14	2R	11.4031	12.6731	5.74936	7.08665	9.04317	1.70008	122.985	51.6228	28.4032	34.9467	39.0593	10.9931
Atox1	15	4.4	3L	21.0514	12.8154	13.2134	24.9079	23.6427	16.5627	27.3229	26.4011	76.0071	67.3103	48.0325	39.8963
Atpalpha	9.7	5.5	3R	17.0638	29.8917	171.777	258.822	32.7549	7.99955	450.491	278.749	663.618	660.262	650.489	116.59
AttA	24	14	2R	22.9846	4.32011	46.6369	27.0509	1.1036	1.49922	9.26413	143.271	41.4385	11.4749	74.3782	0
AttC	24	14	2R	2.43121	0.613236	107.059	21.6572	0.952024	15.0237	41.6135	299.412	69.4105	40.8017	89.6329	0
Atx2	7.7	4.1	2L	11.7736	11.6319	19.8206	29.8553	36.6625	14.0411	662.369	272.788	573.748	594.211	258.214	27.3192
Aut1	24	6.9	3L	13.4604	10.3979	17.8254	19.8555	15.8561	11.9631	15.2012	13.6118	14.6406	13.3124	25.6698	12.428
Awh	21	7.2	3L	0.0155609	0.169054	0.308845	0.485062	0	0.0346958	0.478947	11.0937	0.486617	0.671636	0	7.64424
B-H2	17	5.2	3L	0.022455	0.47472	0.178449	0.570329	0	1.15882	16.1573	27.1781	31.3958	23.3305	3.73535	46.6296
B4	27	17	2L	1.67945	2.19647	2.73091	2.7464	3.40635	24.1192	3.3972	3.50386	1.97632	1.83798	2.47855	7.06382
B52	26	13	3R	31.3179	16.8622	92.0776	110.966	113.313	23.1958	80.7706	61.2509	60.5525	74.0061	127.92	46.5436
BCL7-like	20	9.5	X	9.98669	1.18899	3.3135	3.44924	42.3011	2.01914	7.58781	2.42331	13.7817	10.2394	17.2075	1.22465
BHD	24	7.4	3L	196.609	105.773	1.53861	2.88186	1.61147	6.39573	10.7234	10.324	14.3274	12.6004	10.1821	9.24498
BRWD3	19	8.7	3R	14.8006	3.66922	3.38329	5.53688	23.5691	3.72404	3.82357	2.80722	5.83592	5.72177	5.00758	3.52348
Baldspot	20	6.8	3L	6.02632	7.48609	16.8055	13.6678	8.09538	4.61515	33.4535	21.2045	81.654	64.6685	73.5571	11.5697
Bap	24	13	X	31.9669	18.443	17.8632	27.0564	35.7254	11.7703	26.5764	23.6195	32.6672	45.4845	38.7065	10.6836
Bap60	11	6.5	X	34.4783	6.29254	6.74859	7.57962	53.3496	7.41756	7.18377	11.0652	14.6139	11.1975	22.8939	17.1915
Bem46	15	9.5	2L	7.67938	6.38036	4.00161	5.68607	14.1624	20.2174	6.95112	28.7516	5.91009	6.35244	10.4671	36.0537
Bet3	19	5.2	3L	10.1196	5.68598	4.22439	7.33104	18.6905	16.8149	7.36696	18.6466	11.9407	12.2632	17.0702	29.475
Bet5	23	12	3R	6.11283	3.35911	4.54859	6.94975	8.59372	5.88407	26.1368	28.9573	27.329	20.8973	34.947	63.6619
Bgb	31	7.1	3L	15.2571	5.96191	18.7672	29.2846	73.7028	15.8813	8.34842	11.2162	24.687	26.0394	19.3246	17.1768
BicD	16	12	2L	9.80869	3.06918	5.31465	8.95737	25.6114	3.22072	19.6374	17.0286	48.661	37.7904	41.7824	17.051
Bili	22	12	3R	0.195953	1.24663	4.81631	6.58581	0.0245427	0.457175	1.80736	0.596683	3.02523	2.44293	0	0
Bj1	27	7.6	3L	75.0226	13.1951	10.9635	11.8788	260.113	102.039	22.6937	9.79275	5.35165	3.54564	67.2604	16.7083
Bka	29	19	2L	14.1368	3.70454	10.0536	9.25348	40.6964	14.5494	37.0779	37.6947	17.3891	17.7155	107.661	84.7522
Blimp-1	13	4.8	3L	0.325884	1.68121	4.03159	5.08343	0.0326081	0.135326	3.44348	1.71537	22.1453	9.36579	10.9073	0.548546
Br140	28	16	2R	19.5823	4.85833	2.52997	3.2354	40.102	13.0497	1.59573	3.67672	2.0141	1.41555	3.17046	9.56271
Bre1	24	7.5	3L	23.737	4.44183	9.59583	13.5013	88.7815	6.49113	8.00103	27.196	8.93984	7.79207	10.5346	41.1805
Brf	19	11	3R	3.53502	3.67051	0.824593	1.30787	2.31867	1.07705	2.93266	1.95704	3.89825	2.81839	5.46191	1.58277
Bruce	23	11	3R	9.69665	10.1682	7.34117	11.8811	14.3037	5.85801	72.298	31.545	43.5156	52.6189	66.819	2.59712
Bsg	12	7.8	3R	4.6587	4.52322	23.1273	34.0907	10.9898	1.25423	24.3539	22.6696	16.8882	21.5734	59.5204	2.80792
Bsg25D	15	9.9	2L	12.0471	3.59864	6.70034	10.5721	28.6353	1.51173	0.813578	29.0819	4.64161	2.65246	3.57774	54.7066
BtbVII	12	4	3L	18.1916	8.80851	16.4155	25.0066	35.9584	11.5297	7.39619	3.53629	29.3418	16.7492	20.2931	3.66641
Bub1	19	13	2L	12.0462	6.9785	6.12327	9.35494	38.2627	19.7785	1.21514	3.98685	6.6933	4.69974	5.22878	12.2788
Bub3	17	11	3R	30.1697	5.19095	2.83381	4.61785	43.465	17.3956	9.96865	35.9485	7.44524	5.92564	26.6697	49.4889
Buffy	12	7	2R	0.41565	1.52153	0.324463	0.81131	0.214785	0.572864	14.4463	4.07386	16.6998	16.3195	7.47445	1.84545
Bx	15	6.8	X	0.580519	0.275082	1.4973	2.22886	0.761693	0.332064	6.20086	1.94831	8.07755	6.31442	2.34833	0.237633
Bx42	29	16	X	25.9568	9.46524	9.56342	12.9374	47.4414	12.8403	18.2901	18.8025	14.7375	14.9485	28.643	27.1573
C1GalTA	11	7.2	2R	5.68515	2.01053	3.5466	4.3606	9.91437	1.72989	1.51034	0.66808	2.90959	2.53104	1.26762	0.823987
C3G	14	8.3	X	2.58191	2.51271	4.4505	6.26616	5.04928	0.96033	8.06554	4.60856	22.6239	21.9613	13.822	2.63337
CAH2	18	5.8	3L	11.676	22.2757	22.1467	42.1487	10.427	4.00828	1.41746	0.83721	2.9724	5.08727	0	0
CAHbeta	9.1	5.4	3R	6.27027	4.18913	3.64203	6.18872	9.75254	0.0695772	5.0764	3.2188	20.598	20.6535	28.4885	2.2599
CAP	17	14	2L	1.16148	5.93512	8.00616	9.68087	0.632008	0.805133	323.325	148.375	345.809	276.77	416.249	19.3727
CCHa2r	19	11	2R	0.00970019	3.10827	0.0713143	0.0588242	0.000933492	0.205465	0.196567	0.481222	0.531376	0.943766	0	0.6026
CCKLR-17D1	23	6.8	3L	0.0263055	0.387981	0.181643	0.251055	0	1.63185	1.98043	1.50397	7.18127	5.78592	2.51489	1.21273
CCKLR-17D3	19	9.1	X	0.0461452	0.252197	0.238921	0.420615	0.0111781	0.120654	3.16683	1.2113	4.08759	3.7982	0	0
CCS	16	13	2R	7.30731	5.87089	5.41547	9.34911	17.4012	5.28533	4.15855	21.0098	7.46779	8.26521	14.839	32.1256
CD98hc	27	14	3R	39.4427	15.2837	23.9383	38.1617	66.6831	14.2942	363.932	159.605	170.39	257.662	186.06	42.0571
CDC45L	20	8.6	X	28.6151	2.48434	3.68281	2.66513	55.8	2.12793	12.0926	7.14138	6.47412	4.56544	14.2889	2.37935
CDase	16	9.3	3R	1.52154	4.1798	3.16781	5.40048	0.0334532	1.23286	49.0873	21.5215	57.0935	59.5784	90.4299	3.01307
CG10000	12	9.8	3R	0.108831	0.421537	0	0.0308303	0	0.270986	1.18976	1.54201	0.680285	0.798712	6.41045	0
CG10006	15	4.4	3L	0.873036	2.30087	0.718417	1.55452	0.0155862	2.43188	8.31628	2.53428	10.037	8.39956	31.0016	0.663492
CG10011	32	19	3R	0.833718	1.34202	3.64656	5.18061	1.53941	0.438672	3.56666	2.39349	8.6319	9.84022	4.01598	1.1818
CG10019	15	7.1	2L	0.0203814	0.110656	0.368188	0.463728	0.0222425	0.0419616	1.91632	0.750961	5.30284	5.20346	3.50047	0.073434
CG10026	11	5.9	2L	0.568282	2.28502	2.55981	5.84515	0.125065	9.24526	16.4709	11.0948	7.76036	17.4142	12.1515	0.594931
CG10038	29	16	3R	8.69544	3.48247	1.03428	1.28911	7.83135	4.91586	24.222	12.8104	18.5074	13.1745	61.6307	26.9657
CG10051	18	11	2R	0.533007	0.634244	0	0.0206337	0	0.127495	2.68167	2.98345	0	0.222143	24.0481	0.94568
CG10053	21	12	3R	3.33391	9.42537	2.0784	4.50861	7.638	44.6736	5.39752	2.82665	3.64976	3.34919	4.2538	1.46304
CG10064	21	6.9	U	0.071381	46.4198	0.105478	0.0224647	0.00619843	147.483	0.925369	112.832	0.251524	1.51919	0.949125	139.216
CG10068	17	8.9	3R	7.37581	4.21886	5.51417	7.56398	13.5435	2.36319	12.6796	18.5021	12.5708	10.8022	15.3023	14.2672
CG10075	20	5.9	3L	11.8455	12.1378	5.74329	9.31353	13.3917	43.724	162.786	66.8494	152.517	122.975	106.933	24.2609
CG10077	25	7.3	3L	32.2496	64.0091	195.777	254.614	67.7066	72.8863	14.6753	34.6237	93.5921	60.354	30.7491	98.2542
CG10082	16	8.9	2R	4.61974	6.54064	13.6634	21.0574	9.74322	3.46803	17.9593	25.5943	62.6401	38.9769	34.3059	36.2312
CG10086	6	4.5	3R	1.63585	5.66744	0.0076576	0.0102358	0.0377432	6.17622	9.22251	3.74954	4.26675	8.36419	27.8362	0.911374
CG10089	23	6.2	3L	0.425395	7.80422	2.88022	5.5304	0.0861455	19.3122	3.20432	105.442	4.91653	3.74191	3.1863	108.104
CG10092	18	11	3R	7.72878	4.76404	2.32981	2.3967	7.93423	1.13594	13.4898	72.1979	18.4563	22.7309	31.1622	53.7023
CG10098	17	8.9	3R	11.3849	5.04239	4.48549	6.10341	12.6945	6.19484	9.06143	33.8729	17.8428	18.4956	6.36223	55.7889
CG10103	18	9.9	3R	11.6214	7.90113	33.4591	39.9232	46.5994	23.8998	2.73593	3.49526	1.17092	2.80634	0.382749	2.71798
CG10132	34	17	2L	0.694403	3.68781	5.00732	9.54042	0.0477106	0.556146	7.86231	4.556	27.1906	31.3533	3.98276	0.223075
CG10137	26	17	2L	1.66302	3.31198	3.46128	5.52537	0.0787628	0.796917	1.97901	0.480491	3.13093	4.82137	0.123553	0
CG10144	19	5.5	U	8.24879	6.05699	1.01239	1.62581	10.3393	11.4307	3.87073	1.5937	2.96189	4.77217	4.48309	0.678665
CG10147	19	5.8	3L	3.12937	1.05923	4.37178	4.58514	8.94696	0.124975	3.18941	2.02041	2.90783	3.83484	3.37907	1.46157
CG10151	15	5.2	3L	0.802268	3.02705	2.62568	4.85067	0.627096	20.6554	89.2734	32.1382	84.5089	69.0055	29.1722	1.42237
CG10158	20	11	2L	14.0645	28.3265	7.09859	8.60357	41.1359	141.684	30.3896	73.5666	14.6554	15.4878	31.7425	50.1092
CG10165	17	9.9	2L	2.59047	3.95731	0.733084	0.800199	1.00572	0.681546	8.99496	3.09757	1.93883	4.16134	19.3084	1.11829
CG10166	20	7.3	2L	17.0862	11.5515	6.63546	11.9372	18.4444	12.3465	21.1361	49.7352	22.0954	22.0457	63.458	122.416
CG10171	21	6.2	3L	8.19134	22.3095	1.91671	3.40082	11.2723	21.9874	2.99367	61.0788	3.62031	5.24163	4.9992	90.0372
CG10178	23	18	2L	2.36074	4.10716	3.40636	5.43038	2.06493	0.117151	1.00798	12.16	0.580844	1.49608	5.0713	4.14835
CG10185	15	12	3R	0.191279	1.7305	0.279753	0.563756	0	1.26699	2.18769	1.42654	3.24497	5.34246	0.91268	1.27639
CG10186	29	17	2L	5.13787	16.2043	41.3771	69.7758	0.0152148	0.176731	9.27539	3.83227	25.8076	30.8553	0.249452	0.17924
CG10188	24	14	2L	9.55655	2.35086	9.5305	17.2432	30.0146	1.46762	4.34306	4.27928	12.6751	10.5751	10.1287	7.10376
CG10189	19	10	2L	3.02117	3.04047	2.29149	2.40185	2.64504	4.89085	3.92416	6.16351	2.93419	2.44907	6.58204	5.46639
CG10208	20	12	3R	3.92379	8.32986	8.98983	9.48118	7.15257	12.4485	4.23429	2.48135	2.31235	5.28452	9.20316	4.10865
CG10209	19	13	2R	9.54976	2.91867	2.61037	4.21767	8.82281	2.92568	11.1551	13.8886	21.618	24.7396	17.2785	44.716
CG1021	20	12	3R	4.02474	3.21577	7.75487	8.93195	7.44756	0.765253	29.1842	17.3687	41.4841	49.9193	37.5675	10.3731
CG10211	29	19	2L	0.316407	1.02807	1.97691	3.36223	0.0470341	0.984106	259.624	45.7116	441.646	636.601	10.3721	2.71297
CG10214	17	10	3R	20.4367	10.2164	8.20385	11.8207	54.9068	9.04722	23.4281	7.40537	14.0615	18.9677	12.8888	1.59513
CG10217	17	11	3R	22.0319	8.41253	4.9389	6.78555	24.2289	8.77798	26.5372	17.2548	24.8529	27.577	24.145	8.18187
CG10222	13	3.4	3L	9.04123	2.1835	1.6988	1.80591	13.1952	3.16647	12.9455	7.26663	8.61712	8.03734	33.1657	8.8291
CG10226	22	7.1	3L	1.02676	3.10519	7.16117	14.0615	0.119792	2.31046	3.40806	1.89671	11.3344	11.7109	5.03376	1.19413
CG10237	14	9.7	2L	18.2031	8.14579	5.30555	13.7921	25.0942	0.468239	103.598	50.2789	66.6994	87.8284	39.9943	1.3589
CG10249	28	15	2R	0.742687	4.93758	1.64843	1.91002	0.265817	17.1121	20.5934	20.9205	36.4304	39.1287	30.3262	10.9223
CG10253	27	14	2R	0.761826	12.4634	0.975636	2.18682	0.00665953	8.77887	9.68343	14.647	32.0352	36.3325	2.79753	29.8265
CG10257	14	8.3	2R	0.213725	1.01815	3.11086	3.72045	0	0.00245164	6.86159	3.26072	14.7364	23.2856	0	0
CG10268	24	14	2L	5.58747	4.11583	1.30471	2.9935	10.3179	10.254	35.492	42.7885	11.1051	10.644	14.5374	9.91532
CG10274	17	4.8	3L	6.9083	2.31747	2.08766	2.93672	10.5651	1.61081	7.8205	3.92181	17.1834	14.3895	16.6069	2.9295
CG10283	19	8.9	2L	1.04287	0.541636	2.05548	3.39187	1.44087	0.376249	7.76432	2.74606	14.1774	16.0137	17.9522	1.99406
CG10298	21	13	3R	0.104637	28.9038	0	0	0	47.7194	7.82912	240.365	9.10791	14.773	17.8221	149.44
CG10300	16	10	3R	0.91031	2.08134	0.0188238	0.0490638	0	0.18401	1.82539	2.79374	0.280883	0.513188	14.079	0.321865
CG10306	19	6.8	2R	85.88	60.8419	71.8976	65.4283	129.58	182.482	248.29	151.859	131.384	191.826	367.195	149.34
CG10307	16	10	2R	4.77579	37.1136	7.27924	4.51494	0.103518	98.1265	6.01735	70.5577	8.54055	12.0853	10.1712	181.73
CG10311	16	8.5	3L	1.06872	4.2263	2.6055	4.30753	0.0541621	0.267065	281.024	303.061	219.746	215.497	302.322	331.987
CG10321	20	6	3L	17.5227	7.76813	14.0314	21.0519	47.9712	15.0052	4.22103	3.04912	18.2302	11.0391	18.3524	4.78122
CG10324	11	6.6	3R	4.70383	1.45603	3.93311	5.16733	12.9701	1.23118	9.62392	6.51467	19.7049	17.0974	19.6155	9.43717
CG10336	20	12	2L	14.6596	1.25536	0.766503	1.00606	36.0734	4.81868	2.67478	5.4985	2.99362	2.34826	7.49164	17.7816
CG10338	12	9	2L	5.56469	3.22323	2.24336	3.55934	8.3537	3.18393	2.22668	4.5523	1.93122	3.54662	3.83539	6.60066
CG10339	18	13	2R	0.0644016	0.362291	1.39708	3.67206	0.028964	0	3.42434	1.56252	0.988128	0.461558	1.19232	0
CG10344	15	8.4	2R	7.88607	7.15735	1.14144	2.77422	44.7523	32.9402	3.92048	21.0998	1.97728	2.25996	13.813	26.7746
CG10348	12	9.2	2L	0.0293764	0.456503	0.229391	0.478054	0	1.09272	3.61646	0.582032	15.915	7.37292	2.68934	0.347621
CG10352	9.8	8.3	X	0.190737	0.957877	1.0653	3.41482	0	4.25453	3.03455	0.737529	17.042	26.9034	0	0
CG10353	16	11	2R	3.99406	5.30101	7.78482	8.88212	5.81098	1.69429	2.80855	3.7899	3.32832	3.99336	2.20994	1.85367
CG10359	12	3.6	3L	0.304171	1.41342	0.521561	0.607676	0.055087	0.364495	6.21782	2.68345	10.3266	12.1777	8.7952	0.65154
CG10361	27	15	3L	2.07328	2.85249	6.29311	7.15703	0.0169551	1.97975	13.9362	5.67098	46.327	58.1997	6.68475	0.131688
CG10362	15	9.6	X	0.26835	1.63928	8.90741	12.3611	0.00744481	0.171281	5.77649	2.3423	14.8136	22.1496	0.745128	0.049704
CG10365	14	8.2	3R	3.08847	14.9796	2.65213	2.32389	2.34096	77.6799	492.062	323.297	146.248	131.33	53.3563	292.566
CG10366	23	12	2L	9.99992	6.71136	5.40307	6.65111	25.5761	11.676	1.50389	2.66632	2.73337	1.74704	1.7432	5.53658
CG10375	21	14	3R	11.0288	6.50987	11.8347	12.8425	27.8243	35.753	13.2778	31.6117	21.0036	19.3718	24.9691	74.3245
CG10383	25	15	2L	5.99734	10.6763	2.82776	3.69173	9.71567	16.3038	745.512	293.798	117.789	151.992	75.0061	304.048
CG10384	16	12	2R	0.122055	0.948307	2.74274	4.35535	0	0.00729363	1.98302	1.62018	27.661	20.5301	2.21943	2.1154
CG10399	22	11	2L	5.12623	3.964	1.68199	1.73171	2.63604	0.625767	31.1308	39.2363	18.7726	22.1085	35.0206	34.1826
CG10407	20	10	3R	39.7202	147.205	0.582109	1.04671	10.1882	814.084	75.3794	6.08021	3.88696	6.09441	69.0746	4.39245
CG1041	28	15	3R	7.34788	6.9012	4.78677	9.78192	9.28629	2.72833	191.339	512.341	88.3695	94.8881	58.8721	262.585
CG10413	17	9.5	2L	10.9381	7.55773	3.06487	7.38698	18.5767	8.2603	11.2537	16.7499	11.5772	14.858	18.6763	15.0835
CG10417	14	10	2R	24.1316	4.3601	20.4356	34.1102	170.129	11.5182	14.4086	34.3875	27.9788	25.8211	40.1659	76.6011
CG10418	20	6.7	3L	18.9294	10.1635	2.84406	5.42672	17.5078	12.5936	6.35877	1.94158	0	0.586553	3.08478	0.73248
CG10424	20	11	3L	12.4364	7.76531	2.83271	3.61219	14.0154	6.32818	7.98442	4.69843	17.6448	15.4864	16.8163	3.3291
CG10425	23	15	3R	11.5089	6.6391	2.67608	3.18131	16.0474	10.2427	10.8543	32.4781	17.3906	14.0365	26.9213	47.9368
CG10426	22	6.9	3L	2.58651	4.54953	2.72006	3.97435	2.52051	4.09291	1.33741	0.691189	5.4672	4.16966	0.222953	0
CG10435	21	11	U	9.93543	5.97955	5.97285	7.33313	22.7213	13.4118	18.1512	189.199	21.3703	16.2497	24.2443	156.389
CG10440	20	15	2R	0.0284366	0.805605	0.750674	1.86103	0.00638942	10.9109	1.01611	1.48578	12.5196	10.4484	2.20712	2.7314
CG10462	20	11	2L	10.9012	2.44642	4.16319	4.53904	45.4672	0.984588	14.3909	23.059	14.9869	15.2261	24.3452	26.6407
CG10463	33	20	2L	6.30043	1.7207	1.52294	1.90134	12.8564	1.99107	18.4628	5.95671	7.32528	10.4743	33.7316	5.03868
CG10466	25	14	2L	4.86721	3.67238	0.187692	0.2311	0.390988	1.35272	39.1235	190.876	16.3535	18.6487	31.0121	155.259
CG10467	20	13	2L	10.6756	13.5257	2.02784	2.90147	3.99079	2.17468	8.73313	6.334	5.91788	11.4796	15.423	1.53149
CG10472	16	5.6	3L	110.61	236.726	0.371963	0.53637	0.0215543	171.929	703.272	286.32	0	0.165965	1604.4	12.2187
CG10477	18	7.1	2L	21.8034	59.2827	0	0.0839069	0.02688	7.48909	2607.5	827.73	0.918922	1113	5196.06	39.7122
CG10483	24	6.8	3L	0.372769	4.49632	3.41398	5.62208	0.0442384	1.97607	11.6915	4.67781	18.1314	15.2388	6.69429	0.425392
CG10508	20	6.7	3L	0.363171	2.23576	15.9206	22.0495	0.0398556	7.70155	4.72189	2.0544	14.7865	18.6566	2.50535	2.67349
CG10512	20	7.3	3L	2.32887	6.04967	2.8064	6.05695	0.223922	3.3673	52.5775	9.32626	35.2378	36.6211	35.0203	1.4422
CG10514	17	9.3	3R	16.0889	48.1927	5.95428	6.77917	0.751992	40.2908	22.1513	31.9275	0	1.06363	235.615	12.5043
CG10516	22	7.7	3L	4.8076	8.10719	3.46853	14.1498	2.81598	14.1477	2.83369	35.8857	3.00434	2.72014	6.02395	65.3427
CG10543	15	4.5	3L	5.99139	3.98056	6.85027	9.08482	12.9181	2.21845	1.10073	2.47848	13.8328	5.10082	4.03981	8.4005
CG10553	10	5.6	3R	2.41267	9.7687	8.9842	18.3591	0.221712	10.0411	3.34063	2.34126	10.8683	8.83461	18.0689	2.39314
CG10555	18	9.2	X	14.2274	2.32768	8.15769	16.2813	48.5659	0.865843	1.91371	1.53682	5.88626	4.16466	14.5136	7.91997
CG10565	26	6.9	3L	42.9382	26.2802	22.5588	25.6157	100.448	108.505	33.8415	88.1416	37.2488	27.0985	45.4049	105.263
CG10576	23	16	3L	99.58	29.968	18.4159	15.6809	116.689	90.5979	4.50332	102.552	19.0751	15.5319	14.538	169.982
CG10585	23	6.3	3L	9.64734	6.39691	3.02191	6.20796	12.6934	7.27566	12.0531	8.38029	14.1583	10.7497	4.83894	6.77289
CG10589	17	5.6	3L	0.216564	37.9483	0.0115746	0.0735413	0.010883	81.4258	0	271.634	0.502429	4.77726	0.152804	358.144
CG10590	32	10	3L	18.1638	16.8752	3.87606	4.95752	15.9394	23.1826	13.8936	27.56	26.8436	22.4963	32.973	32.2082
CG10600	17	11	2L	11.0516	14.5671	21.3588	26.2534	60.4537	53.952	5.417	5.85185	18.2475	16.6295	20.3224	7.44278
CG10602	17	11	2L	32.3532	12.6024	7.64478	11.0526	50.746	18.7506	38.861	48.4189	24.5908	33.8892	86.6151	42.3918
CG10616	18	7.1	3L	12.009	34.2632	3.17607	4.84908	17.601	102.874	0.70049	13.4529	2.8838	1.2618	2.40008	9.45933
CG10621	24	10	2L	10.0651	8.48891	19.6092	23.6596	0.394624	0.920788	1.45454	1.11314	17.4636	28.0587	22.518	8.30542
CG10625	16	5.9	3L	0.187092	0.159564	0.364544	0.841007	0.107069	0.0497473	16.6716	9.28434	58.973	40.819	78.37	4.08296
CG10628	26	17	2L	7.01059	3.50687	1.30825	1.90723	5.78838	4.26029	14.3349	8.62275	16.9426	18.7438	20.2162	7.83172
CG10635	15	5.6	3L	42.5826	20.2464	17.4134	22.5439	65.8229	61.4988	228.442	255.821	45.3431	43.7029	89.9142	91.8849
CG10638	15	6.5	3L	9.85413	4.48509	1.40745	3.69983	12.8046	5.3968	46.5341	76.0462	40.0174	43.8717	81.4034	54.2169
CG10639	19	9.8	2L	6.97173	17.0201	9.9497	10.3048	6.24849	29.6118	15.1569	13.2946	11.2755	13.5855	25.4059	8.55472
CG10641	10	7.3	2L	3.22324	1.74011	4.83474	7.71641	4.47161	0.910132	20.01	10.0889	31.0037	31.9414	24.208	2.60233
CG10646	25	7.4	3L	6.36085	3.08702	1.46148	2.09383	6.32491	2.65235	5.30209	3.67314	4.28281	5.71178	5.25598	2.82751
CG10657	14	4.7	3L	0.432638	8.60343	0.815137	1.82289	0.00451234	0.646889	35.915	16.1669	95.8207	99.8941	32.8131	1.41837
CG10660	17	4.3	3L	1.31401	7.92942	1.0472	2.43843	0.27202	14.4582	13.5345	6.38427	15.3506	12.9963	19.411	0.964119
CG10663	18	6.3	3L	0.105422	0.457894	0.249957	0.195664	0.0242002	0.159929	3.34874	1.13889	3.14109	2.88935	4.70057	0.523678
CG10671	21	5.8	3L	14.5404	19.3242	8.27696	9.34229	25.9905	11.7815	13.1093	60.7196	9.91192	10.3305	33.0868	66.8269
CG10673	18	8.9	3L	10.8826	8.55178	5.1372	5.32684	12.492	17.1179	41.3403	39.4912	10.735	11.9311	22.3295	19.1008
CG10681	25	7.4	3L	3.29874	3.28973	0.459672	1.60397	4.38271	3.4383	11.4563	4.20037	19.571	19.5956	15.7577	8.54415
CG10688	19	8.1	3L	20.906	14.1094	6.88114	6.75269	14.5854	7.77777	28.9492	13.4131	33.1178	24.2707	95.9837	14.1497
CG10703	27	19	3R	15.6606	8.88227	12.3328	19.7209	31.4521	23.6841	16.8774	22.3006	17.6517	17.474	15.5886	25.7144
CG10721	15	9.2	2L	4.47108	7.02921	2.11484	3.28371	3.82286	8.60803	16.6924	19.3571	27.4999	21.031	23.3792	29.9557
CG10725	17	5.1	3L	1.41382	2.39319	0	0.0277903	0.0154353	0	0.191741	1.14414	0.680664	0	0	0
CG10732	19	6.4	3L	5.32022	21.7404	8.51193	10.2399	16.3805	57.3474	25.6813	32.1487	44.0112	32.5677	10.1512	62.3025
CG10737	14	9.4	2L	4.47321	16.3421	11.4637	16.3544	4.82243	1.87581	2.31303	1.84965	6.81154	5.94298	3.76582	0.168211
CG1074	27	18	3R	12.9507	5.30097	1.10815	1.76596	13.2595	6.68355	10.8528	11.4339	8.75113	9.47148	19.3758	14.1846
CG10741	8.1	3.7	3L	1.78645	0.931821	3.84862	5.50605	7.7754	3.96952	1.83934	0.783182	8.83382	5.45055	6.70164	5.86256
CG10747	12	8.3	2L	4.09266	5.88171	1.75264	5.23969	1.69822	1.74481	2.40943	11.9811	4.36317	5.31935	5.17215	16.926
CG10750	24	17	2L	0	20.414	0	0	0	85.9259	0.077394	319.403	0	5.03138	0	309.99
CG10754	22	9.9	3L	18.9966	8.37265	6.25202	6.0528	27.0385	24.2234	10.1458	87.0061	16.7091	18.278	37.6119	266.926
CG10778	21	11	U	11.3477	4.54232	0.642418	2.3489	7.62396	3.58327	26.9422	36.346	11.2176	15.473	20.5343	32.8016
CG10793	16	11	X	0.0783805	5.82751	0	0	0.0503472	12.1162	0.197638	121.178	0.666811	2.311	0	143.42
CG10795	16	9.2	2R	15.1416	6.29915	12.4927	18.1683	47.7298	13.6748	7.32464	4.84828	29.9691	20.7196	26.7036	8.1345
CG10802	24	12	X	13.9039	9.51234	4.25065	8.17892	16.6454	6.0941	109.024	100.296	69.4065	91.8542	59.2876	43.3849
CG10804	25	18	X	0.192521	1.03551	14.9493	20.6615	0.0159972	0.00659027	1.98497	11.3813	4.11557	3.51662	0.121476	10.3795
CG10809	21	5.4	3L	8.47533	9.11985	4.92313	4.8415	15.2638	18.9596	4.75239	1.99446	9.27167	6.50833	9.66745	3.05285
CG10814	11	10	X	4.0571	0.0126675	0.244714	0	0.0189687	0	1.21572	0.574287	0	0.761329	0.175949	0
CG10827	22	13	3R	14.9383	15.9823	0.00481167	0	0.0229779	7.95143	49.4839	60.7955	0.37408	0.498778	237.776	2.464
CG10830	23	14	3R	0.877288	4.31855	31.7233	50.8161	0.232603	0.44433	1.23285	0.382667	5.1075	3.22688	0.651317	0
CG10839	24	14	U	0	4.81295	0	0	0	64.4096	17.9407	161.076	21.6246	25.465	53.6362	271.075
CG10841	27	15	3R	0.00286114	46.0585	0	0.00982503	0	98.2272	0	304.367	0.063696	4.1093	0.102066	347.971
CG10864	23	14	3R	0.250649	1.16822	0.346415	0.913896	0.0416441	0.0731559	2.57141	1.21165	1.4719	2.39199	1.06818	0.478293
CG10874	15	9	2L	10.0599	4.74241	14.0189	13.9949	41.586	10.993	31.0398	16.5944	37.9698	38.534	29.5684	12.7795
CG10877	20	10	3R	5.80927	3.38826	0.442214	0.602773	8.91512	2.13575	8.68239	14.557	7.81809	7.4011	12.1583	10.8237
CG10889	16	13	3R	8.33591	1.83759	1.03816	0.993801	6.57773	1.32491	7.59063	9.96035	14.8676	13.048	16.5847	47.1976
CG1090	19	11	3R	0.402368	2.39156	13.169	26.9019	16.3821	6.77123	4.40036	9.20491	42.1476	35.0949	3.00657	14.5172
CG10903	10	7	3R	6.58724	2.87783	2.2538	1.7792	8.00533	5.25077	14.3728	11.8583	2.54622	3.73458	11.3608	12.1464
CG10907	23	6.7	3L	3.68481	4.25402	2.36867	2.92686	9.85011	4.95812	49.4064	19.3102	27.1002	21.6181	38.9109	8.09937
CG10914	10	7.4	2R	5.11352	1.80708	1.92901	2.03031	5.52388	3.42988	4.01298	3.77781	4.78372	4.41324	12.7922	3.2069
CG10915	17	9.2	2R	13.0603	5.29867	10.1594	15.7707	27.1507	2.19784	4.23874	5.29803	12.0943	10.0891	8.6784	8.23592
CG1092	16	12	3R	1.21229	3.94526	5.69718	9.82905	1.36735	2.99876	21.5312	3.21797	23.3358	28.1686	42.3128	1.39436
CG10933	17	9.4	2R	0.132709	1.35594	1.28373	0.520995	0.0142714	6.08156	0.967622	1.19008	1.1491	1.437	1.67301	2.08861
CG10936	18	10	2R	0.933933	0.459668	0.440074	0.458352	2.45798	1.18	3.13297	1.90634	6.33145	3.70998	1.50775	6.24072
CG10947	10	9.6	2L	0.275155	4.47959	3.42999	5.10811	0.0123087	24.9354	1.84916	32.1615	12.9459	6.31331	1.08516	99.5295
CG10948	24	6.2	3L	3.68209	3.3178	10.7293	16.1847	11.2688	3.11201	4.77598	2.09193	7.80211	6.13244	6.10381	2.29629
CG10960	23	5.7	3L	8.27621	6.35131	3.16294	7.54296	8.17699	0.983623	45.0811	17.999	37.8024	24.5987	81.2391	1.34588
CG10962	17	12	X	9.36215	2.78879	18.7922	15.7217	11.2846	1.77705	15.1852	4.20639	11.9084	16.0075	33.9667	3.32811
CG10979	31	18	3R	17.64	3.38802	4.01019	6.06065	59.9389	10.2129	8.44882	12.4957	13.9251	13.4642	12.9876	25.8922
CG10984	23	7.1	3L	5.99282	5.60528	10.0143	15.0093	22.1947	15.1296	16.625	5.78292	48.388	33.0818	37.9589	3.02853
CG10992	16	11	X	62.5768	77.058	34.4933	42.5624	29.8296	57.958	290.192	141.942	196.793	217.065	338.216	41.9077
CG1103	14	8	3R	11.9184	3.25882	3.65845	3.88181	27.9279	9.12418	4.44316	3.37863	8.54432	6.98459	10.0206	3.12918
CG11030	17	9.3	2L	1.73089	3.68769	0.730069	1.19473	1.97171	1.53771	9.3087	5.90268	11.9148	10.7855	25.0592	12.2634
CG11035	18	11	3R	7.13472	11.306	5.75909	9.34056	8.7458	18.5498	18.9718	53.6165	20.5791	24.7514	16.7249	64.1328
CG11041	17	7.6	2R	0.019574	0.237975	0	0.10928	0	0.0434845	0.42787	453.044	0	9.56384	0.377197	620.249
CG11044	14	9.5	2R	0.502695	3.1749	0.460247	0.360959	0	0.0700926	8.69373	5.02122	18.6227	14.486	3.2084	4.42778
CG1105	9.1	7.9	3R	5.53578	6.3255	4.17693	6.32945	9.03842	12.5742	32.7876	30.779	47.9973	49.1668	65.0978	62.8159
CG11050	17	9.1	2L	11.7744	8.19777	12.1207	12.8008	15.7957	1.05509	40.9885	14.4936	26.307	21.4978	16.4974	4.81432
CG11055	11	4.6	2R	25.4024	10.7307	4.51785	6.59116	24.5621	6.77884	13.0495	8.10207	13.432	13.1751	6.35578	8.31129
CG11089	24	12	3R	22.3005	5.46738	12.1557	21.3101	11.3688	4.01611	282.559	124.123	340.012	291.971	589.917	17.3034
CG1109	15	7.9	3R	13.2752	5.18375	3.20279	4.23467	23.5418	16.7211	5.31216	6.78911	6.21163	5.53438	7.55461	11.6326
CG11099	16	8.4	2R	0.742524	4.17356	16.9076	28.5484	0.00271984	0.00699612	0.907571	5.72063	10.0555	5.48487	0.107601	6.86255
CG11109	22	5.9	3L	10.1637	6.15614	4.57277	4.69532	18.3875	9.09879	4.07039	1.20843	1.42741	1.32854	13.567	0.209514
CG11110	18	11	2R	13.2225	23.1659	7.76468	11.4809	19.7056	105.338	6.42163	103.581	13.5504	8.21245	6.04176	110.617
CG11137	15	5.4	3L	37.8126	29.0367	4.70426	13.8152	20.2517	77.8668	0.940453	0.905302	1.04504	1.13837	2.171	0.12453
CG11141	14	8.5	2R	7.60787	16.3753	2.1579	3.56843	12.2715	44.5299	3.09911	10.2288	4.11112	3.95995	4.74679	24.2525
CG11148	27	14	4	14.9137	5.46681	20.6546	16.9975	72.0319	3.0313	32.4047	21.2467	32.886	37.6967	37.5541	18.0667
CG11149	10	5.9	2L	0.749359	2.36597	0.00316334	0	0	0.0524711	17.6141	15.5897	2.05837	1.56012	41.5477	2.13234
CG1115	17	11	3R	11.0264	9.18325	9.42244	11.8417	15.4714	18.9692	51.3717	56.7756	67.4845	69.0246	76.4773	62.9443
CG11151	17	7.4	X	32.8932	52.6319	39.9141	52.4527	46.4177	55.7218	364.334	290.751	311.382	451.807	1837.73	100.574
CG11155	17	14	4	0.692819	1.57189	8.94129	16.255	2.39298	0.405961	4.00325	1.5276	22.57	23.5393	0.29607	0.421947
CG11160	14	9.1	X	0.501377	2.95855	0.648356	0.514796	0.0034219	0.13169	41.3554	12.1514	8.1343	8.8247	7.66838	0.111828
CG11162	19	11	X	1.29124	2.78854	0	0	0	0.176917	56.1776	21.8174	9.69254	7.11469	132.395	4.80581
CG11164	24	14	X	15.2712	0.71722	0.392991	0.797948	43.2732	2.50735	5.15763	1.65078	1.25038	1.3718	6.33675	0
CG11190	12	7.9	X	16.8581	10.7568	3.66718	8.13912	17.4696	18.3932	6.63703	85.875	8.84118	13.0277	16.7886	146.835
CG11200	14	10	2R	4.57732	3.34001	6.63652	11.357	9.19308	5.73156	18.9342	10.3964	29.9886	48.2843	34.2488	2.99356
CG11203	18	4.2	3L	0.154444	1.10917	2.49867	4.44063	0.0346091	0.000217725	0.244518	1.97932	0.843444	1.12179	2.9886	5.63284
CG11208	16	11	2R	42.0093	15.0433	4.25371	6.59135	36.0237	7.56695	18.8861	18.4162	18.4951	27.1662	90.56	12.344
CG11210	26	15	2R	9.76029	7.51	5.5385	8.44349	15.0941	3.75542	52.4076	70.1285	28.3774	34.7259	49.7114	27.3807
CG11221	22	12	2L	0.0722544	2.26735	0.701747	1.28907	0.0123204	0.0193062	5.24939	2.40081	13.7097	13.1636	5.98633	0.233126
CG11236	12	8.5	2L	5.59724	9.15084	10.3224	9.01113	0.00598523	0.531046	26.352	19.7377	36.4891	63.2459	164.696	7.53956
CG11247	22	10	3L	6.50033	5.63907	11.236	16.767	21.8432	5.20378	15.7947	81.3103	10.3448	13.2467	14.7698	46.0378
CG11249	16	9.4	3L	0.174963	17.1226	0.0174541	0.0152088	0.0201891	81.3189	0	148.745	0	2.50175	0.060614	233.461
CG11253	19	7.7	3L	0.516387	17.9358	0.0284459	0.00899997	0.131354	133.821	0.068762	113.234	0.099259	1.95254	0.237118	108.247
CG11255	22	5.6	3L	20.6192	10.4608	30.755	39.8436	30.4896	9.23821	75.2509	55.7607	80.2949	74.3535	141.48	19.5715
CG11266	25	14	2L	14.9533	17.6588	35.1937	56.4241	25.6188	4.349	38.1896	21.137	79.0781	85.4561	43.8614	13.4706
CG11267	23	5.7	3L	122.5	22.8749	42.4471	52.9931	331.897	65.3182	119.027	39.3256	72.7236	95.0915	305.432	29.8788
CG11284	19	9.8	U	11.6385	3.08425	3.24645	4.2333	20.1855	1.14169	10.1146	16.5874	12.6448	9.98532	16.9704	20.8418
CG1129	19	11	3R	8.04586	7.15801	2.80117	5.2388	11.6375	5.3412	6.02572	43.1878	3.78778	3.15818	16.9663	45.6021
CG11306	11	7.3	3L	13.0887	9.25681	10.5394	16.6685	16.5062	13.2187	11.6727	13.5039	6.94313	8.71053	17.8408	8.09789
CG11309	19	5.7	3L	13.4404	17.6916	6.88535	12.2461	6.9726	4.65827	7.4206	11.4411	17.1818	15.8209	55.4594	10.5292
CG11317	19	12	3R	0.106193	0.687682	3.55673	4.96584	0.00250701	0.191052	1.39954	2.29617	12.14	9.25214	0	2.12681
CG11321	17	12	2L	1.0933	7.47439	7.1899	6.66523	0.0317491	0.0391525	28.0592	16.6407	28.3101	30.2368	5.97124	4.92338
CG11334	8.2	6	3R	13.5355	8.35843	3.45373	4.36033	14.3329	11.644	68.5282	51.1947	38.4162	47.7985	107.471	31.6892
CG11337	14	7.8	3R	7.09662	2.43966	1.43956	1.64603	11.8413	2.86814	7.6849	22.4013	13.0762	17.7052	10.0367	29.6354
CG11353	16	11	3L	0.710679	0.390702	0.100763	0.109975	0.165118	0.0622246	5.03456	2.45628	3.47512	5.5907	6.74608	0.384144
CG11357	19	5.3	3L	4.48126	1.88419	2.01703	3.17824	7.72427	1.68436	3.40539	4.11969	13.1422	8.6382	7.41851	3.4673
CG11360	17	9.7	4	3.29142	0.47341	1.06171	2.16967	1.99984	0.189352	0	3.68413	0.238612	0.259576	0.158681	11.1238
CG11376	19	10	2L	4.93331	2.01087	7.33212	9.74092	17.7719	0.415949	2.38671	6.66047	6.98319	6.4405	5.09194	8.28003
CG11377	13	8.7	2L	19.8609	8.65385	5.31416	7.78435	23.1496	4.615	2.9953	6.59063	1.44495	1.87938	4.51553	1.97646
CG11378	8.3	7.1	X	12.1235	15.1717	7.38144	15.4434	3.91904	17.8125	5.36772	8.42631	0.904899	1.2451	29.2508	0.176671
CG11388	17	11	2R	4.91063	8.60043	31.1077	40.2188	5.03747	1.34843	14.6423	6.75623	24.2204	23.1578	8.8325	5.04716
CG1139	23	6.1	3L	0.460178	1.24297	0.00664218	0.00284755	0	0.655606	26.9331	30.9699	0.120957	1.0868	136.257	7.43468
CG11399	18	5.7	3L	19.4669	2.3662	5.12174	7.1383	36.0038	0.872679	4.26067	1.49951	11.4122	6.87688	6.99363	1.10458
CG1140	12	4.2	3L	8.49224	9.68	3.16497	3.69758	2.69028	4.80622	224.7	52.6897	214.565	198.236	198.132	8.97093
CG11409	19	13	X	0.466061	0.431918	0.231876	0.332766	1.33187	0.22623	0.971509	1.16209	1.33129	1.46982	2.09112	1.27175
CG11414	13	8	2R	18.5698	19.2343	12.3228	17.702	46.9135	44.5729	11.5948	77.1368	12.977	11.4664	18.3821	130.824
CG11417	18	13	3R	25.9003	3.12678	6.56231	8.9361	65.1634	10.0505	3.60154	3.24405	3.32681	3.70161	13.9964	8.75351
CG11418	10	6.9	X	7.32987	7.1662	0.948998	1.21802	8.29632	15.5089	1.03454	24.6396	2.16253	2.57176	5.15497	49.1542
CG11426	16	4.9	3L	1.67451	5.66442	4.47416	4.112	0.229886	1.90877	4.72778	1.52607	10.612	10.3262	9.91235	0
CG11438	12	4.8	3L	0.723139	7.30039	1.88655	1.49259	0.0471721	16.1476	3.73076	2.86748	10.0495	10.2598	2.86067	1.0793
CG11444	22	13	X	50.2835	22.9515	36.2024	42.1218	164.42	145.611	157.702	137.938	37.7873	39.9109	72.5369	50.1605
CG11447	17	10	3R	7.02503	5.15495	2.83347	2.95088	8.60713	2.73481	3.03758	6.5578	1.6687	3.5462	5.13674	5.8696
CG11449	17	9.6	3L	0.0107222	0.136366	0	0.027072	0	0	0.043152	103.535	0.367468	1.38322	0.050664	169.783
CG11453	10	6	3R	0.957892	1.76504	0.0682152	0.234092	0.259927	0.0760191	1.68395	1.4845	0	0.425238	6.28642	0.220052
CG11455	18	8	2L	8.77542	10.2965	14.5938	5.29562	6.18636	3.4451	531.317	185.481	277.949	287.264	110.171	33.6374
CG1146	12	4	3L	6.66229	15.5242	6.08563	5.41	7.85871	27.8483	40.384	10.996	70.1195	39.2119	44.7216	1.51552
CG11504	25	13	3R	14.7563	6.55467	7.19716	10.3513	37.6473	28.8863	10.8621	10.8822	15.2292	13.3846	15.1423	8.75002
CG11505	19	7.5	3L	18.8961	17.9013	4.88074	8.29346	39.571	24.2661	6.01243	20.104	56.3368	28.5066	28.2206	62.8629
CG11526	46	19	3L	19.792	31.0715	4.33549	5.84369	12.6879	40.8812	18.9472	150.724	29.9302	26.4279	32.7798	176.042
CG11534	18	5.6	3L	7.72122	4.48169	0.661977	3.13736	5.68443	3.56161	3.67154	1.48923	4.42311	3.00004	8.12371	0.193824
CG11539	15	7.4	3R	5.20037	4.81949	1.77673	4.94789	13.0638	14.2377	4.88358	9.35042	3.87911	3.98162	3.4764	17.8
CG11550	14	8	3R	0.865865	2.33746	9.51126	10.0551	0	0.526648	6.0895	2.33513	12.4759	17.0276	2.0137	0.317253
CG11576	19	10	3R	7.60932	7.40919	1.64236	3.39524	4.89506	2.77852	38.179	28.3326	15.1514	20.7809	32.4751	7.11591
CG11577	26	15	3L	11.1243	3.58419	5.98842	10.5705	32.9673	7.65716	22.7104	15.9556	15.3726	15.607	27.0406	12.5475
CG11583	18	10	U	29.2115	3.87991	8.38298	8.92308	67.0302	9.52558	39.3724	21.9156	9.78502	12.3444	58.6841	17.6979
CG11586	26	7.6	3L	14.1424	14.0203	20.2467	29.8825	43.1146	123.546	239.215	83.9745	58.8896	45.6121	77.3713	23.8274
CG11592	22	11	2L	0.966804	1.43107	0.47145	0.988498	0.0174656	0.564539	4.68969	3.09759	1.92379	1.31283	10.0655	0.531798
CG11594	21	5.4	3L	9.84304	23.0961	22.7816	28.4947	0.394045	7.23141	15.2355	33.1044	16.6357	15.7672	28.3815	26.9588
CG11596	26	7.6	U	6.74934	1.50901	1.93459	3.15498	7.64634	1.17957	3.53788	2.10066	10.2247	8.53702	7.16732	2.14663
CG1161	14	8.9	3R	19.8065	20.6588	14.7962	23.2331	12.4413	15.8702	77.2047	61.8208	69.6914	65.086	59.3449	46.262
CG11617	19	10	2L	0.841591	3.10044	1.2424	1.86834	0.0460162	0.179962	44.4624	15.7604	35.5149	23.6597	12.17	1.21782
CG11638	12	4.8	X	0.198239	0.469969	9.11357	4.09093	16.4454	0.194864	4.07442	19.2049	4.4069	4.7963	1.03694	8.19705
CG11652	18	6.2	3L	9.4181	5.48226	1.71007	2.63191	11.147	6.13864	23.9358	21.4739	30.09	22.6162	49.5045	42.4102
CG11656	17	9.8	3R	0.257484	25.8194	0	0	0	226.537	0.601358	473.145	0.194801	10.3923	0.480899	360.316
CG11658	21	4.6	3L	1.1035	2.80357	6.11177	7.24192	0.963665	5.83379	45.9826	7.02532	53.5116	34.2462	17.0997	1.24103
CG11660	22	5.7	3L	16.0211	1.73236	4.29033	5.93979	46.5128	2.88048	5.8131	6.83559	5.59254	6.22134	17.1175	6.87136
CG11665	22	13	2R	6.42925	2.9771	1.42606	2.25293	7.44227	1.44392	56.0142	23.0943	42.0476	42.0647	44.9458	5.63349
CG11679	19	10	X	7.1152	4.51339	1.83672	3.09706	17.5801	5.87054	2.63689	47.6933	1.5666	2.33598	5.89818	55.0841
CG11686	17	9.6	3R	2.50233	4.20126	2.05356	3.83109	2.02267	0.73922	147.807	86.5466	180.25	141.695	129.074	8.06089
CG11695	28	15	X	5.43385	4.26031	7.52532	4.23542	8.283	9.74447	1.69058	1.05958	1.15097	1.58252	2.40958	0
CG11696	28	15	X	11.6702	3.41543	4.54045	5.36824	23.6477	12.1789	2.16875	1.25332	1.60443	2.96229	5.36538	1.46589
CG1172	13	8.1	3R	8.93104	6.55396	3.49233	4.30366	18.1441	22.8434	8.27535	217.234	8.9306	11.2674	16.3618	284.205
CG11722	21	8.7	3R	6.32045	15.6928	7.78072	10.2044	15.1996	194.073	18.6704	11.1094	23.1502	20.6893	20.8264	16.9025
CG11737	9.5	7.6	3R	8.38494	10.1813	3.29211	6.43723	16.1036	12.2977	6.55391	4.45362	6.78973	8.50391	20.9065	0.65629
CG11755	26	13	3R	6.07402	5.95637	2.30359	2.25979	12.991	20.1178	2.21812	5.99307	3.078	8.37511	5.75397	12.8037
CG11760	16	10	3R	8.96338	2.52958	17.1699	19.0938	89.9593	5.10211	16.1079	10.9233	8.16557	5.618	1.43653	0
CG11768	21	12	3R	7.37502	1.2993	1.97235	3.7394	0.00132834	0.063989	2.69924	1.26454	20.8154	15.0922	0.580257	0.584941
CG11771	25	13	3R	16.7737	13.7054	5.94497	10.0999	31.2521	43.7654	26.9403	74.5726	23.6941	28.9391	35.6319	60.2714
CG11777	22	15	2R	8.00356	3.87217	2.12772	3.22259	20.1936	13.2866	54.1783	84.2101	23.6572	40.3317	51.3696	115.603
CG11779	25	16	3R	38.3357	15.6006	4.67377	5.9306	21.2307	61.6994	70.5495	504.926	35.5345	36.2543	42.0421	558.346
CG11781	27	18	3R	13.9792	7.68629	0.816404	1.65368	3.28028	4.67354	59.7765	166.718	35.7789	37.8377	71.0401	164.453
CG11786	20	11	3R	0.0217994	0.164376	0	0.0246243	0.204024	1.63062	11.4771	63.651	3.46726	4.50434	7.5825	22.7443
CG11788	27	14	2R	7.25595	1.28422	0.364942	0.867473	5.8432	2.94184	8.62625	3.96497	0.813248	1.05896	11.3248	2.46023
CG11796	14	4.8	3L	13.9876	12.4979	30.7172	43.0462	0.00995671	0.0894827	108.924	18.5868	141.894	155.867	46.4123	1.37188
CG11802	18	11	X	10.9158	7.22077	8.65203	11.5745	31.6394	32.1187	0.698514	4.23564	1.99097	1.55353	2.90824	3.41026
CG11807	27	17	2R	9.43828	6.30301	6.11197	10.783	33.0256	13.2841	18.8531	12.0489	21.3385	22.2643	19.5717	10.931
CG11808	17	12	2R	5.54955	2.53774	7.46521	10.9341	29.1668	41.9855	6.06306	14.2696	2.8764	3.30612	8.47028	10.8278
CG11811	27	13	3L	25.6236	4.8983	10.4101	13.5735	84.2508	10.8822	30.4417	10.6033	30.0338	26.3568	34.0803	12.0196
CG11836	23	14	3R	5.54401	0.602585	0.438478	0.786116	13.6916	0.880714	4.295	3.35953	8.82946	6.86346	2.892	2.21845
CG11837	7.4	4.5	3R	13.5098	1.77056	2.38661	2.23211	14.8421	3.48788	13.201	5.67106	3.9779	3.99506	33.2254	17.1483
CG11851	20	9.9	3R	11.7106	1.77801	0.853395	1.81444	19.6694	0.962731	1.79814	5.56466	0.65932	1.55836	5.95803	8.43573
CG11852	9.4	6.5	3R	2.17992	7.05903	1.42191	2.21826	0.600902	5.08916	31.2624	17.2465	22.1862	44.4598	1.88895	0
CG11857	19	11	3R	30.7269	25.1226	23.1835	37.6967	49.9866	25.7877	66.7439	126.864	62.9992	67.8139	103.882	95.2893
CG11859	20	11	3R	15.1361	5.31975	4.21755	6.24322	17.6695	6.4591	17.1599	40.754	8.93391	11.8116	25.5711	46.5475
CG11873	14	14	3R	2.61918	1.51476	3.0979	4.83697	5.48322	1.02801	2.5161	2.15729	6.39808	3.94251	4.44414	5.46067
CG11874	24	17	3R	17.601	5.10958	4.96648	7.4688	29.9116	1.99031	12.7434	25.7286	21.6065	22.4749	16.8265	37.4597
CG11876	19	13	3R	41.5568	107.078	27.8741	38.0295	27.6625	139.241	910.633	626.018	759.026	831.15	297.9	253.151
CG11877	21	15	3R	7.93117	10.2341	15.4449	21.0657	26.3303	45.1322	16.1246	11.0212	22.104	28.0576	22.0982	15.1922
CG11880	17	9.1	3R	17.9935	14.0542	3.32893	4.80264	23.8662	15.5866	48.7461	28.3528	65.5426	71.1843	61.493	10.4438
CG11883	26	15	2R	1.03324	0.739014	4.73473	6.97768	3.13367	0.700912	6.33329	5.49807	15.2176	18.2553	5.58355	3.34172
CG11897	25	13	3R	53.6104	4.97862	4.00698	3.93149	109.391	3.50499	35.7183	8.18335	17.9157	22.7702	39.1213	1.87298
CG11899	15	9.4	3R	50.8158	18.5297	15.3181	21.7331	28.6662	14.9002	149.465	136.465	323.914	336.469	605.994	86.8218
CG11913	17	12	3R	0.0276207	21.219	0.00233926	0.176194	0	107.568	0.027882	163.323	0.088154	2.86573	0	132.015
CG11920	21	15	3R	9.24793	1.82145	1.28503	1.9399	20.9393	4.01274	62.572	55.4832	26.6528	31.6591	60.6472	22.775
CG11975	24	15	3R	8.63178	6.49628	5.1186	8.26033	14.6197	11.6639	15.7379	7.3095	34.9263	23.3271	36.0874	2.98966
CG11980	16	10	3R	43.2021	7.90681	5.47939	6.81377	54.7623	5.90449	27.8941	8.58119	11.585	14.6598	38.1905	4.84263
CG11984	15	8.6	3R	27.5165	33.2727	10.9895	16.5238	36.9196	38.7046	54.8188	60.4626	83.6606	79.4425	30.7179	41.2393
CG11986	15	8.6	3R	6.88085	5.43654	0.242318	0.87959	9.11575	12.1733	22.2161	69.5248	16.4145	15.2624	24.8625	101.812
CG12001	17	10	3R	3.0287	4.04195	1.76798	3.37775	3.96059	2.80162	12.1703	65.9439	13.7697	17.6443	13.7043	123.594
CG12004	15	4.8	3L	8.8423	8.14532	4.91509	7.56444	13.8221	7.21626	46.196	52.7465	55.1604	49.8037	82.152	55.7398
CG12006	16	4.5	3L	17.9021	5.80644	4.97877	6.18023	41.2681	6.88263	4.42976	46.0274	9.30403	7.51317	13.6951	76.1559
CG12010	21	5.3	3L	4.99984	0.894239	0.568428	0.999736	6.64748	0.470977	18.0033	7.85797	10.7393	16.0207	19.6308	4.69782
CG12012	12	5.1	3L	11.7336	9.45199	18.6099	26.5074	40.7673	17.2055	49.654	32.2587	58.8222	44.8124	52.5164	34.0509
CG12014	14	5.1	3L	0.157405	0.47681	1.02694	1.16628	0.0642021	0.0273269	5.27231	2.65585	17.888	17.3078	7.39032	5.54218
CG12016	21	6	3L	10.3549	10.2522	35.6725	36.4641	20.4676	22.7227	31.089	4.22395	38.5663	28.7108	59.0374	1.60394
CG12017	30	9.9	3L	0.00486221	0.104352	0.00416733	0.0200801	0	0.101696	5.83232	3.00761	13.824	14.9101	4.5601	0.779402
CG12018	22	6	3L	14.5109	4.21921	2.28056	1.62217	35.5487	32.9474	3.16435	1.53655	1.99802	3.38983	10.7642	3.49981
CG12020	14	10	3L	0.00972237	28.5512	0.00100353	0.000735421	0.0387357	170.398	0	183.957	0	3.54107	0.225088	229.072
CG12024	22	5.9	3L	17.2006	10.1564	42.2828	46.4301	82.0262	49.7261	12.0959	70.761	10.9243	15.7397	14.0492	56.5253
CG12025	20	5.4	3L	10.6828	10.379	18.9697	35.4481	25.1335	11.3869	64.5085	86.2765	49.6183	43.4583	62.1059	135.416
CG12034	20	5.4	3L	21.3349	16.1882	3.84566	5.77964	26.0215	35.6212	21.2567	14.5717	78.0045	51.8357	27.0803	35.3292
CG12050	14	8.8	2L	10.1822	4.06957	0.994357	1.36416	12.8206	7.96397	4.69046	3.28791	3.61668	3.13355	17.337	4.02586
CG12054	23	14	3R	8.27767	3.5075	9.86304	17.1176	26.0199	7.15092	12.6064	13.0582	32.3271	22.9743	23.9324	19.4342
CG12069	17	11	2L	0.0525296	18.9664	0	0.0297336	0.0253181	53.5253	37.6537	22.5627	54.031	68.8305	38.0466	20.3803
CG12075	16	8.9	X	0.473612	0.433427	0.508567	0.868312	0.327972	0.162199	20.3504	4.03387	34.5528	25.511	14.3806	1.31417
CG12077	16	5.3	3L	5.59776	1.49726	0.951173	0.967974	10.2227	2.84046	7.149	29.151	4.11454	4.43382	12.8037	25.6545
CG12079	20	6.2	3L	61.3167	130.116	22.7819	27.3728	19.7188	73.0289	494.131	258.38	635.264	599.392	278.067	75.5029
CG12081	11	8.3	X	12.1557	8.01603	6.45334	8.29185	25.0314	15.6532	5.76785	6.63919	27.4669	20.5616	21.44	11.8031
CG12082	23	6.3	3L	36.141	12.5341	5.87672	9.60972	49.6447	29.9178	8.23884	62.4966	5.75896	9.82206	23.0663	95.9711
CG12091	16	9.5	2L	45.4129	55.5979	29.0217	44.6379	34.8737	11.9436	68.8728	212.521	78.159	79.4439	100.119	190.501
CG12099	18	4.8	3L	21.1585	29.9299	37.4175	50.1346	45.1561	33.6764	111.873	155.364	166.707	135.018	85.5918	258.611
CG12105	31	8.2	3L	1.80872	7.54101	0.783953	1.09818	0.0407256	0.186896	6.93354	4.58579	19.009	13.554	6.98759	0.171647
CG12106	12	7.8	3L	7.73095	20.4782	0.827058	1.12218	4.83587	0.0645426	80.6821	170.984	49.1703	40.8444	20.568	95.5462
CG12107	18	14	2R	33.2629	15.2802	9.88285	17.8503	76.4939	24.0931	27.3873	109.301	7.97377	13.2424	30.2493	47.9476
CG12119	9.7	5.6	X	2.38589	6.33541	4.30606	4.45191	0.139457	0.320289	28.8913	6.79147	8.59386	11.3672	7.6685	0.524044
CG12125	11	5.4	X	21.0557	6.89812	3.39995	3.93341	28.6811	10.6004	6.14664	9.69198	6.50955	7.79107	18.1111	7.61295
CG1213	19	14	3R	7.32407	21.3142	12.893	16.0471	0.0753342	1.27455	67.8756	16.4333	3.92958	7.74514	141.993	0.572792
CG12140	19	10	2R	23.8459	21.6295	20.7722	26.1833	35.8275	7.26696	74.0972	46.3804	90.3569	115.956	159.003	6.33032
CG12162	14	6.5	3R	14.5309	84.9876	10.4375	19.6374	24.2527	408.485	43.0064	135.373	56.3056	54.4558	36.4556	177.78
CG12163	11	7.8	3R	9.2718	18.3703	8.52283	11.1894	8.41179	19.481	293.417	149.409	298.226	389.376	271.089	22.9363
CG12164	24	17	2R	0.0446133	0.236103	0.0353815	0.0155572	0.0597102	0.291642	3.83574	2.22643	1.72205	0.542269	0.965725	0
CG12170	22	15	3R	12.747	14.4222	2.53858	4.47448	5.56376	19.1535	20.6722	12.0605	16.2829	20.3822	28.3971	8.22364
CG12206	11	6.2	X	0.369754	1.67474	0.00116065	0	0.08587	1.28619	0.130362	10.9294	2.10883	1.23788	0.779585	36.1221
CG12213	26	15	3R	9.80611	7.11747	14.1849	22.2809	27.192	23.596	7.8155	8.71556	14.0585	11.4638	10.6276	5.19965
CG12214	17	9.4	2R	14.2572	46.0162	30.8331	33.4928	28.1645	162.237	91.0425	142.04	167.283	153.153	92.6426	270.263
CG12229	19	5.7	3L	0.447644	53.9056	0.0152496	0.146135	0	207.037	0.431544	111.274	1.94891	4.31541	1.03763	121.112
CG12236	17	10	2L	21.6908	9.17963	6.29019	8.19747	18.2156	0.332856	17.5946	60.8724	22.7688	24.0958	23.1969	154.778
CG12237	22	12	X	30.6176	14.0425	8.29099	14.5274	31.4583	15.8718	9.67051	6.41032	14.1848	17.2268	9.95283	5.50325
CG12241	19	11	3R	9.23822	10.5985	4.37131	6.08351	20.7739	23.3469	2.049	35.1528	2.23936	2.61752	2.37602	34.6306
CG12253	14	10	2L	4.8243	1.35193	2.76143	3.94585	19.0234	5.79528	1.96597	1.76745	2.12784	1.69525	3.88862	3.93134
CG12259	19	8.4	3R	8.95825	4.33524	8.73946	14.0078	23.3199	21.1344	6.65299	6.04883	11.2282	11.1282	19.4758	17.5341
CG12262	26	7	3L	77.28	62.9071	11.1075	13.2225	36.5735	6.89955	450.599	248.757	442.132	541.14	887.494	26.432
CG12263	18	9.9	2R	8.91816	3.89504	1.70901	3.37888	12.9566	3.48799	9.37276	30.2347	3.773	4.43945	8.64891	36.3555
CG12267	11	8.2	3R	5.07008	1.01366	3.32104	2.17037	12.1856	1.27371	2.23229	2.16968	0.22579	1.04756	4.83648	1.83627
CG12268	22	8.2	3R	0.605441	11.4257	0.207351	0.509673	0.0262574	1.23547	14.5407	12.0918	7.90068	11.5439	54.388	0.944429
CG12272	17	5.6	3L	8.29831	7.40341	1.69666	2.201	4.33669	1.92359	39.9295	20.8177	71.7168	65.5381	94.4721	9.54885
CG12279	17	4.6	3R	10.3997	12.4602	5.4388	9.05159	15.7334	106.58	87.7904	56.4461	85.6908	74.0229	239.361	9.60111
CG12288	28	16	2L	10.5776	0.459317	0.160223	0.451913	24.8733	1.29212	31.1758	11.2922	11.6398	12.7268	49.6197	6.70827
CG12290	26	16	3R	2.81862	5.1508	4.20809	5.72572	0.570502	1.04	15.8727	11.227	30.6832	32.1613	18.9007	0.528601
CG12299	15	9.6	2L	15.8272	3.31078	10.2858	11.7638	53.8039	5.84931	2.70916	30.1881	6.53155	7.11914	4.5605	77.1551
CG12301	19	5.7	3L	10.414	1.27622	3.99355	3.23658	28.4765	2.48746	2.89698	1.59344	3.53688	4.06232	10.7134	2.96154
CG12304	17	4.7	3L	21.8237	10.9912	7.19461	11.5578	34.4083	54.275	30.1394	24.4316	30.3201	33.0791	36.4796	23.4723
CG12309	19	9.8	U	0.0861301	49.0976	0.00656366	0.0440603	0	172.589	3.42982	834.642	0.9848	15.1679	3.16995	360.127
CG1231	16	13	3L	0.0139483	0.446589	3.49148	5.3578	0.107445	3.90747	4.6215	4.69396	5.98069	4.0707	6.44579	5.33423
CG12320	13	10	3R	4.79162	2.37655	1.3567	2.69187	5.63173	7.5914	11.9236	92.0474	12.2909	9.76176	22.7774	180.418
CG12321	9.1	6	3R	43.2132	44.7438	7.92136	15.6531	48.747	125.881	90.6201	126.994	13.3866	23.8189	50.0573	66.2811
CG12325	10	8.6	2R	10.0134	0.845765	2.32313	2.40937	15.7877	0.399545	3.05846	1.23829	1.06253	0.838428	12.6404	1.76971
CG12333	22	13	3R	9.04029	9.15188	7.43394	10.5794	14.0677	18.8913	3.36329	28.7534	15.1464	9.92962	5.94407	44.005
CG12338	22	12	2R	9.9186	17.9256	21.9904	12.287	1.87591	2.56958	84.88	93.93	38.7415	51.5855	106.122	109.383
CG1234	30	18	3R	15.9662	3.6696	3.90661	4.22709	27.1724	9.04518	6.75776	2.71315	4.37362	4.03247	21.268	3.53
CG12341	29	14	2R	7.91483	6.01244	5.86048	5.74859	14.4959	3.67594	25.9612	17.453	19.319	16.4736	24.1766	8.87723
CG12344	16	9.7	2R	8.19948	8.06457	13.9021	15.4779	9.99554	6.65105	1.71036	1.53422	12.9158	9.40385	0.124264	1.76492
CG12355	13	4.9	3L	0.852394	3.88629	1.82546	3.18243	0.116833	3.3694	31.3821	9.87814	23.7829	43.6536	15.9088	1.83489
CG1236	15	9.7	3R	21.2793	8.25169	5.33892	7.8455	37.991	22.3043	1.77663	2.11846	5.73724	3.51409	1.68458	1.09023
CG12379	21	8.7	X	3.77104	3.38058	1.21417	1.62686	1.27248	6.73889	34.5805	65.6242	22.0967	21.3754	26.8731	36.7208
CG12384	20	11	2R	38.7147	35.2187	64.2747	63.8745	79.12	86.5003	331.863	117.967	153.146	207.603	950.049	175.717
CG12391	24	14	2R	24.6359	4.26945	10.0333	13.1309	88.4466	2.58142	5.77073	2.79847	6.72478	7.7634	7.90155	1.93183
CG12393	15	8.7	2L	9.5408	6.50992	3.71286	6.534	12.1069	18.5535	14.4702	10.6399	35.6554	30.3489	30.8127	27.6706
CG12398	11	7.4	X	12.0403	0.067493	0	0	1.47026	0	3.91703	0.180725	0.217811	0.063091	12.0142	0.082687
CG1240	21	6.4	3L	62.0819	25.499	30.224	53.4913	172.588	147.926	24.9385	12.4197	8.94794	7.43572	25.0249	11.1898
CG12400	11	8.2	2L	42.393	79.196	24.2048	41.1727	16.2202	95.768	485.51	240.011	841.24	1121.72	394.048	126.573
CG12404	12	9.8	2L	4.01517	4.01809	1.15795	1.34516	3.24692	4.37243	29.9789	54.5743	28.0691	28.9689	41.317	68.1273
CG12413	23	13	3R	3.57541	1.60748	0.923656	1.51008	4.31952	0.751395	3.91027	4.52291	6.73869	6.77664	11.5924	7.9544
CG12428	12	7.8	3R	10.0864	7.8837	2.70816	4.43917	15.5802	1.48378	22.9136	23.6778	17.6961	22.7784	57.6534	2.94069
CG1246	20	5	3L	6.50697	10.083	0.00921205	0.0414846	0.080554	2.16333	11.8218	8.59606	0.833034	2.93066	55.6523	2.37068
CG12470	14	9.9	X	0.00657557	46.3097	0.102606	0.179824	0	259.067	0	2373	0.493939	27.4516	0	1685.97
CG12484	10	7.1	2R	0.07248	0.311216	0.978494	1.46967	0.00348527	0.0299105	2.69413	2.55229	15.7899	11.0173	0.366187	5.59318
CG12499	14	12	3R	19.8799	1.07351	1.31006	1.82682	29.9956	0.507468	2.08198	1.28145	1.11156	1.02905	7.14938	1.23083
CG12502	23	6.7	3L	0.973196	0.15527	3.55786	6.89198	0.0139012	0	1.72899	0.322916	4.3161	4.12201	0	0
CG12512	20	13	2L	4.66927	6.67468	3.38058	4.85958	6.05511	1.80014	9.18327	8.13123	7.51698	13.1596	18.0505	2.00266
CG12547	23	14	2R	12.2527	3.855	8.55794	12.9894	27.1769	3.15046	32.7875	15.7587	23.6751	22.4062	42.173	6.64438
CG12567	25	13	2L	3.72389	0.734052	4.08275	6.65315	10.3639	1.32402	39.4277	123.955	15.6658	14.7225	29.4132	48.1345
CG12582	20	11	3R	8.14933	6.35101	5.11198	6.07456	8.68906	7.03043	56.1139	16.9142	47.4866	68.7771	56.9049	2.69808
CG12605	16	7.8	3L	0.194651	10.8003	9.75039	16.2159	0.129185	42.6043	1.23507	1.15985	36.9175	17.592	0.083258	2.92721
CG12643	17	11	2R	1.38902	2.26329	0.991617	1.9357	0.130085	0.682015	1.16881	1.18703	0.217568	0.861437	2.01625	1.87967
CG1271	22	6.8	3L	3.01144	6.07294	2.6645	2.4553	1.52631	5.43179	10.4681	8.76388	8.39332	10.2816	19.1239	1.84339
CG12746	21	11	3R	8.40031	11.3389	20.6091	22.3721	18.0807	31.5977	7.99086	201.938	13.2467	18.6652	7.8996	131.53
CG12768	19	7	3L	0.0983916	0.217429	1.61589	2.31357	0.0963894	0.296977	5.06285	1.79372	13.4738	9.60696	1.56888	0.253911
CG12769	16	11	2R	0.609181	0.776408	2.64697	5.12413	0.373775	0.0265044	2.92132	1.91626	7.36301	6.96843	1.45476	1.02989
CG12773	18	11	X	19.1767	7.22928	7.78276	10.1073	28.8203	7.57864	4.81281	13.9596	6.90515	5.67661	19.0962	23.0062
CG12796	15	9.6	X	0.107776	0.186199	0	0	0.0131725	0	10.0383	5.63775	2.67121	7.19139	29.8955	1.19943
CG12814	20	11	3R	0.295392	1.18355	2.61123	2.5448	0.0670376	1.2649	23.9437	15.0861	58.825	60.1343	30.3148	1.18979
CG12817	18	10	3R	0.138581	4.43923	5.75116	14.0352	0.0819	21.3381	7.73419	5.06249	28.0119	36.6784	0.574164	4.34348
CG12818	14	13	3R	4.33374	2.16212	2.39689	2.97064	17.1493	12.0458	9.47638	7.19743	13.8871	14.7288	11.8972	23.2043
CG12822	18	12	2R	18.6821	18.1388	19.5977	34.3658	25.95	16.9642	14.0517	8.2565	21.1355	26.7728	20.611	5.08984
CG12848	16	10	2R	8.19541	17.3487	11.9985	14.3671	27.9375	31.0642	59.3374	47.3221	81.025	85.3292	82.1788	91.5134
CG12851	18	9.6	2R	0.181276	1.71472	3.00968	5.62886	0.0453728	1.20387	2.68621	2.05358	7.64053	9.35908	0.940128	0.329383
CG12877	15	8.2	3R	13.2941	3.21903	6.29687	9.95519	48.7762	10.3529	3.3336	209.277	5.28416	6.26598	5.77107	210.444
CG1291	26	7.8	U	10.1672	9.66322	4.07323	4.30163	9.6363	11.7479	21.6262	9.39935	11.2786	15.9526	27.2366	3.41546
CG12913	20	12	2R	7.70983	8.15282	1.51776	2.49772	0.0013244	0.712596	4.01039	3.40453	13.1426	11.4889	8.07518	0.351243
CG12935	29	14	2R	12.4744	4.3896	0.878738	2.1634	9.99256	3.89142	37.5805	17.2883	15.665	17.0113	60.4953	29.6581
CG12950	20	12	3R	0.198279	1.38018	6.07278	9.39528	0.0330612	2.01056	2.90797	1.5685	13.3253	17.4065	0.118333	0.169665
CG1299	22	8.4	3L	2.33502	8.21371	10.278	11.5213	0.0655916	1.33156	101.076	42.6384	97.9866	113.596	28.9045	1.63834
CG12991	15	7	X	0.481351	2.59146	1.83806	3.60997	0.663221	6.80972	19.9676	11.3278	46.8877	51.9866	26.916	2.85168
CG12994	18	9.8	X	0.400421	0.701727	1.12513	1.60049	0.00152495	0.0328503	1.28616	4.15397	19.5333	14.6764	0.141803	18.004
CG13001	25	8.9	X	5.13969	1.38961	4.33768	6.40734	17.1404	4.66683	0.76302	4.56321	3.32149	2.14944	4.35088	7.84708
CG13003	13	10	X	0.14414	0.604498	0.630541	0.783126	0.0298344	0.0139703	0.659802	1.01673	12.6214	6.48534	1.73222	2.02265
CG13024	17	4.8	3L	0.843581	0.619283	0.209637	0.357472	0.00183837	0.0653652	0.704038	1.53256	2.15383	4.11312	1.86505	0.228372
CG13028	22	5.2	3L	0.0933392	0.0627569	0	0	0	0	9.79003	5.67226	9.61865	18.7929	11.5291	0
CG13032	18	11	U	0.0175229	27.6709	0.0150702	0.104677	0	162.793	0	161.664	0.178992	3.8864	0.049064	271.141
CG13062	12	4.8	3L	0.0126738	0.0484199	0.0514089	0.281144	0	0.0852466	1.7704	2.00181	4.60647	3.21293	0.187889	0.256785
CG13063	15	5.3	3L	0	1.16524	0	0.293059	0	0.135669	1.14088	7.1817	35.1768	93.6424	3.60286	4.28025
CG13064	13	4.9	3L	0.0190525	0.0121316	0	0	0	0	0	3.04433	0	0	0.155686	3.00011
CG13074	7.7	3.3	3L	0.609346	0.595557	0	0.0915319	0	3.56017	4.06489	2.30161	2.55645	4.72948	3.15612	0.317118
CG13082	31	15	2L	0.577479	2.07534	3.11864	4.18553	0.0798439	0.0687453	2.07404	1.62016	18.9115	13.8815	2.25125	2.0922
CG13089	16	9.3	2L	13.5097	5.3129	1.17602	3.40541	17.2095	12.8718	9.0988	58.0601	7.97591	11.3561	19.1243	36.7841
CG1309	23	7.4	3L	16.6529	25.9912	8.20599	14.6087	18.3483	49.5414	57.9846	33.0288	53.6858	48.639	48.7749	19.8746
CG13090	18	12	2L	10.5989	8.34321	2.46423	4.64736	17.9271	30.7342	9.48856	5.19652	3.92362	3.87965	8.20106	1.08965
CG13096	26	7.8	U	35.6238	6.60924	22.2841	25.0769	97.533	43.7839	17.0138	10.6985	18.8517	13.8703	73.5774	18.7698
CG13120	27	14	2L	0.0049115	0.0282865	0.172881	0.0270154	0	0.0104972	1.23498	1.78516	0	0	0	1.916
CG13126	15	10	2L	8.27935	1.68948	2.83048	4.183	16.2964	2.01675	9.98743	6.8315	8.07772	10.5007	14.1546	3.20828
CG13133	11	8	2L	0.520536	4.43863	0.409663	0.471212	0	0	1.03813	0.428377	9.37801	10.9643	0	0
CG1315	17	9.9	3R	3.21278	16.0573	3.27101	1.22258	0	2.60601	17.4859	7.56784	35.9377	58.3902	52.3632	2.32602
CG13154	19	12	2R	0.548363	1.61373	0	0	0.0873685	0.0721643	2.00829	7.30792	0.830071	1.9071	2.56795	18.0029
CG13155	16	10	2R	4.9136	4.3025	0.486583	0.0185424	0.0610007	0.0058364	17.4041	6.20345	8.14633	6.83964	106.317	5.01511
CG1316	21	5.3	3L	11.7554	15.0455	99.5474	108.041	63.6157	71.5057	47.3419	78.4343	22.6245	21.9346	29.9364	43.2505
CG1317	18	4.9	3L	11.8377	39.8402	23.5193	40.2565	15.8004	89.4475	0.317542	2.44267	15.1533	6.02668	5.66357	1.36437
CG13183	12	6	2R	0.0193988	0.059232	0.210493	0.217265	0	0.0751064	3.12716	7.89429	15.1792	13.6423	3.46095	18.042
CG13185	30	17	2R	6.97983	0.581129	2.76814	2.84057	13.2186	0.568358	2.67586	1.73772	2.53531	1.48928	12.861	2.43694
CG13186	16	14	X	0	23.1232	0.0112416	0	0	112.949	0.094414	589.568	0.228177	6.39309	0.189944	558.952
CG13189	18	9.8	2R	7.12834	8.57544	4.75858	7.14986	9.0374	10.4713	63.6832	28.5661	39.6316	47.3174	73.2142	15.6513
CG1319	17	10	3L	29.3017	19.8251	8.09133	6.7696	36.433	22.1748	12.1372	19.248	10.8493	9.86888	9.51419	17.3889
CG13197	15	10	2R	3.93989	4.6617	4.8607	6.69095	20.2739	16.811	5.61563	339.772	7.01748	9.58112	11.4659	512.807
CG13204	24	12	2R	1.02924	1.3311	2.21839	4.52938	1.70555	0.447587	1743.83	577.299	183.562	335.965	592.393	25.671
CG13248	13	5.1	3L	0.294808	2.1568	8.33324	13.664	0.0339245	0.34305	1.04779	0.347794	5.35226	5.73505	0	0
CG13252	14	6.3	3L	1.01743	1.16174	1.23105	2.29376	1.07243	1.11095	2.1456	0.607771	10.0832	5.58491	17.9773	0.484631
CG13258	22	13	2L	0.0292902	0.250097	0.0346566	0.0498476	0.0191926	0	0.151625	8.58737	0.34327	0.644201	0.853988	5.17889
CG13278	22	12	2L	0.0406194	0.144789	0.0571958	0.00732589	0	0.0107406	1.69934	1.14883	0.937801	2.96335	1.39299	2.62159
CG13282	15	8.4	2L	0.787127	0.948002	0.0666351	0.146022	0.260965	3.83502	4.0153	26.9002	2.84309	2.96525	31.2852	42.1037
CG13285	17	6.5	3L	0.392556	1.15599	0.619261	0.291915	0	12.0673	21.2167	7.63567	24.7469	20.5033	28.4968	0.414142
CG13295	19	6.4	3L	5.16778	4.60194	5.55166	6.29891	10.0878	3.81209	14.9175	6.48225	24.5777	22.1727	11.0832	4.341
CG13298	23	7.4	3L	31.3262	18.2637	14.1364	24.0673	72.5945	62.0078	63.5227	37.4116	57.9686	66.9063	98.1163	30.0046
CG13318	23	14	3R	1.44015	1.09547	1.25302	2.90287	0.0572488	0.0576019	3.96511	1.84654	4.86928	7.05207	0.291777	0.209761
CG13321	14	8.5	2R	18.4705	31.446	0.0346771	0.144599	1.85021	9.16209	13.3651	73.2438	7.03909	7.08894	78.9063	158.288
CG13322	13	6.6	2R	10.5724	17.5352	11.7605	16.5388	71.8206	93.6902	3.71198	40.0227	8.72523	7.56374	8.71142	49.3202
CG13326	17	11	2R	0.00580118	22.6831	0.0145677	0	0.000842517	52.4672	0.480214	81.1715	2.53362	3.72451	0.182757	146.737
CG13333	8.9	7.5	2R	0.668337	0.177818	0.0283735	0.143419	0.040653	0.0813697	2.41908	10.1016	0.562474	0.671079	21.8613	1.5244
CG13360	11	7.9	X	5.27767	18.6096	22.7892	23.4706	0.240186	4.84511	0.538676	2.04304	0.137261	0.124303	0.887388	2.08022
CG13364	29	16	3R	86.0712	31.9258	61.6298	81.8356	151.645	93.9622	2.72454	4.10652	3.95689	4.54934	5.24518	4.5814
CG13365	19	9.5	X	13.068	16.7916	7.94921	8.66696	8.61081	7.85049	46.724	17.0652	91.0757	64.4416	64.6067	10.0986
CG13369	28	13	X	14.2649	13.0097	8.17684	7.93548	8.83372	15.5503	34.0516	11.2527	24.1638	15.8781	71.7036	8.0742
CG13384	24	12	2L	6.25012	3.83595	3.76183	6.74908	5.44573	2.8515	17.7875	16.0457	24.8946	34.2714	34.2507	12.6423
CG13390	26	13	2L	5.70693	3.44984	2.58217	2.69811	4.83462	2.39954	14.7239	7.84039	13.9688	15.1213	26.8243	7.5374
CG13392	25	13	2L	8.62962	2.99249	1.77313	2.54767	10.9319	1.09137	29.3756	15.8592	34.021	45.1326	43.5034	7.48952
CG13397	25	17	2L	11.1155	2.1226	4.44207	3.67795	19.5686	0.727245	4.93806	3.86481	6.44935	9.35498	8.47892	3.08175
CG13398	21	12	2L	6.89922	2.1132	4.53276	5.18746	21.7021	2.07755	8.15056	13.9403	14.4586	15.1314	10.4804	22.9876
CG13404	18	9	X	0.973082	2.14174	1.99463	2.42772	0	0.0150904	3.25823	1.82934	5.94743	14.8657	1.12441	0
CG13409	24	14	3R	0.666823	3.14934	6.09554	10.9275	0.0268278	0.540539	9.96661	5.22428	18.7319	29.3187	7.86122	2.08722
CG13436	23	16	2L	1.05801	17.6983	0.792762	1.27397	0.0238486	37.8684	4.88282	1.57466	0.535577	0	4.38212	0
CG13442	21	12	2R	0	29.9233	0	0.0131407	0.00295785	161.114	0	380.868	0	5.84092	0.091968	498.891
CG13449	20	6.4	3L	0.0117801	5.74097	0.110027	0.409399	0	47.8998	0.149459	1.49654	0.077059	0.481137	0.254972	0.70154
CG13458	15	4.5	3L	0.237437	1.59962	0.864298	0.705497	0.00615387	0.230127	7.28856	3.11439	8.66846	9.65974	0.245672	0
CG1347	10	6.3	3L	9.87803	4.2633	12.5098	12.1056	25.1066	2.36349	3.9816	39.9934	15.1718	12.3921	13.6308	112.851
CG13472	17	5.6	3L	13.6668	4.3838	7.14976	9.12223	31.1605	8.22326	2.15984	78.4377	10.5517	10.4589	7.81539	402.119
CG13501	16	10	2R	0.017874	9.33249	0.104222	0.00378567	0.0187243	22.5251	0.056256	173.83	0.14101	3.58595	0.223956	166.06
CG13510	11	8	2R	6.58728	15.2525	14.8904	12.3225	4.00663	60.8088	65.9742	74.105	104.575	105.53	1292.44	76.54
CG13531	21	10	2R	6.35674	3.3214	2.02098	2.74288	7.70612	1.59201	8.67688	6.47883	10.1914	9.85649	12.302	1.96743
CG13532	20	9.6	2R	0.138591	0.774316	3.40321	5.83388	0.00981954	0.0724145	22.6308	10.0492	34.5901	41.2755	2.87068	0.582958
CG1354	6.6	2.9	X	40.3721	10.6886	12.8986	14.0458	62.5035	16.863	66.491	49.85	53.2032	55.9807	172.536	73.6303
CG13601	23	15	3R	17.8118	8.44588	2.38412	6.64305	20.992	10.4972	10.8198	81.433	11.6393	14.5868	13.992	101.606
CG13603	16	6.2	3R	20.4886	13.3609	2.91532	6.96152	8.98114	5.71579	92.6987	35.3971	26.8217	30.3418	28.7665	6.59821
CG13604	28	15	3R	2.29544	1.72526	2.38835	3.91013	6.01206	0.543152	9.69804	14.8479	29.6601	34.9621	15.5977	27.206
CG13605	15	10	3R	13.5966	10.5112	4.99488	6.93875	19.2344	21.5909	15.5347	71.1473	29.8847	27.9822	32.4404	162.012
CG13624	20	6.9	3L	1.54026	1.13236	3.88004	4.77787	4.47399	0.372349	8.33314	9.41972	10.3236	14.956	14.8867	15.8075
CG13625	15	11	3R	12.1863	1.9116	17.0879	19.4401	86.335	8.30889	1.99324	7.82228	4.90208	2.89703	8.92026	30.9321
CG13630	23	15	3R	29.7884	16.7466	4.86736	5.45948	14.3997	53.987	24.5252	44.9246	16.4562	22.8757	33.1166	41.4978
CG13631	20	11	3R	6.17512	21.9325	26.6252	36.1039	4.64101	3.93022	25.7535	13.4095	14.2993	18.2002	18.7123	1.00283
CG13636	19	9.3	3R	1.05632	0.852352	2.09925	3.00472	2.84898	0.0998699	18.0886	7.20587	56.3742	53.412	18.0693	1.32923
CG13643	17	12	3R	0.0302278	7.00399	0.245507	0.755963	0.0231567	0.0176067	3.81259	2.25155	16.9782	8.41932	7.20879	2.51614
CG13646	27	14	3R	0.00902709	0.128397	0	0.0344906	0.0173283	0.0447641	6.57241	0.622687	0.184195	0.166923	0.560797	0
CG13650	22	13	3R	0.501594	2.39375	17.3681	24.7644	0.604283	0.354684	5.67234	2.82852	24.325	23.4946	1.94664	0.526457
CG13654	14	9.1	3R	0.216707	0.594171	1.07264	1.22347	0.0267185	0.0158747	4.01653	1.24478	6.97978	8.61037	4.02013	0.269937
CG13667	21	5.2	3L	4.31997	11.8341	1.74265	2.12284	5.19229	52.2537	11.7469	60.6877	11.809	9.93164	18.3906	96.6023
CG13675	14	5.5	3L	0.00668516	2.9935	0	0.00564505	0	0	1.57528	0.681449	0.863591	1.04596	0.446176	0.440989
CG13676	19	6.6	3L	0.197365	0.107255	0.119727	0.0974482	0.252169	0.28697	5.61004	4.22095	30.8463	24.198	10.75	5.69323
CG13685	14	6.3	3L	0.16204	1.1648	5.69426	9.03106	0.0135505	0	1.64874	0.772036	27.0417	11.7285	0.173917	0.11947
CG13692	24	14	2L	0.156422	0.531643	0.0190735	0.0150529	0.10301	0.202869	0.64032	0.772095	0.602674	1.07948	0.255243	0
CG13693	25	17	2L	1.9421	11.6629	0.741899	0.638511	0.156989	38.382	0	168.166	0.204229	3.43888	0.084496	278.572
CG13698	10	4.1	3L	0.976588	0.432819	0.283987	0.426481	0.893966	0.241283	7.71343	3.88914	19.6819	13.2218	7.0779	0.983736
CG13705	16	8.6	3L	0.0160833	1.39326	0.00543657	10.6588	0	0.672213	3.09907	2.42809	9.70748	10.6951	0	1.83357
CG13743	19	8.9	2R	0.102138	0.927617	4.41011	9.02133	0.00446179	1.52444	1.0941	7.45247	2.79892	3.38354	0.16741	1.81996
CG13748	18	12	2R	0.0600338	0.541304	0	0.183097	0	2.46011	8.40464	12.4792	24.487	22.9559	35.6258	2.98358
CG13759	17	6.6	X	0.0846493	9.17369	0.49671	0.920829	0	4.61363	8.79934	6.19204	5.12555	3.81918	2.35188	0.42697
CG13760	17	6.6	X	6.83545	4.32514	17.5287	23.82	30.1801	14.7092	29.8286	31.2018	33.628	28.0884	21.9464	32.8462
CG13779	22	8.9	U	98.9936	33.7464	31.2635	44.4094	183.493	83.8166	133.672	160.741	14.5164	21.6553	36.9177	52.7449
CG13796	13	7	2L	0.736322	1.13853	0.893497	0.828748	0.470672	0.143936	21.2617	7.74906	7.36524	8.73235	14.374	0.735224
CG13800	21	5.7	3L	0.720148	2.94925	2.57399	4.09124	0.92435	0.968073	2.31284	1.20537	6.71426	4.0996	3.36168	0.08272
CG13806	24	6.2	3L	0.651278	1.84005	0.00331141	0	0.0134546	1.61775	3.00825	1.69868	6.52663	6.12756	0	0
CG13813	14	8.9	3R	2.17307	0.358786	0	0.0401104	0.131151	0.253765	19.9894	15.3145	15.3958	16.2346	22.0513	13.0732
CG13850	16	11	3R	5.39002	7.84754	0.873423	1.28263	5.57775	1.51868	15.0355	95.7791	14.7997	15.6549	14.4909	79.8015
CG13865	19	12	X	13.5859	4.11715	8.94798	13.13	42.7863	6.3145	107.729	187.391	78.8745	62.9578	57.4707	168.871
CG13868	14	7.6	2R	12.9964	45.2112	15.6323	23.144	0.787864	3.87449	224.724	63.9002	144.752	192.854	67.4715	7.23225
CG13876	20	7.5	3L	8.1086	2.97143	2.55761	3.87654	15.8448	8.41783	6.68061	17.2317	10.9464	8.39447	9.81442	23.6101
CG13887	22	6	3L	34.838	27.5224	22.2315	30.7443	65.2863	76.4178	112.476	163.44	141.288	156.623	244.238	122.557
CG13889	18	5.7	3L	0.0431894	5.41231	0.0967028	0.283563	0.0097271	28.9395	0.086665	2.69804	0.28593	0.179079	0.410862	3.85905
CG13894	17	5.9	3L	0.0427694	0.201907	4.66995	0.944345	23.1864	26.8331	1.72767	0.972248	14.5384	12.0539	9.63337	1.09518
CG13895	21	5.3	3L	2.96487	1.82408	12.6857	17.3671	9.71444	1.66593	2.23343	0.920473	2.51289	3.3013	6.68392	0
CG13900	24	6.3	3L	40.7219	6.72524	9.14239	6.11877	28.8042	3.19956	30.0736	9.97467	10.0442	10.9764	65.0675	4.05836
CG13901	24	6.3	3L	8.06083	17.0244	6.70036	5.65348	29.2633	289.224	27.4161	40.4545	21.0927	16.5722	23.1905	85.1988
CG13902	23	6.4	3L	7.12861	3.61032	11.2448	3.4653	8.39007	5.5884	2.66215	4.5864	8.53555	7.89277	8.60021	10.3354
CG13907	14	5	3L	25.3244	16.9579	12.5463	23.4772	37.5208	13.5135	48.2879	19.5722	81.119	52.1725	84.6716	3.31845
CG13908	21	7.6	3L	1.62661	3.85215	32.8938	51.9264	1.24726	0.0778129	1.0322	0.907324	14.2167	7.55443	0.801971	5.56919
CG13912	21	6.9	3L	5.48975	8.0516	19.5766	16.0335	1.45278	1.62658	26.3777	8.36462	29.414	44.0771	45.5489	3.14761
CG13917	25	6.1	3L	6.17604	4.41883	5.20722	8.9897	9.19924	0.910373	4.41049	13.698	14.2509	10.9607	7.36335	16.0574
CG13924	19	4.6	3L	0.272426	0.297211	0.179896	0.497639	0.093728	0.134656	0.08325	1.5773	0.411703	0.329069	0.044268	3.20662
CG13926	23	6.6	3L	9.8661	10.3315	3.41616	4.39549	20.0269	25.1539	66.4975	30.1842	21.0972	13.198	65.0108	8.56599
CG13928	25	14	3L	2.21122	14.5215	139.968	205.39	0.274774	7.50031	31.4677	28.9064	128.64	167.889	2.78922	59.7658
CG13933	14	4.5	3L	12.9581	7.11717	7.43073	11.4225	22.2906	2.78421	3.83217	6.41299	10.074	6.97669	7.04899	12.1658
CG13936	21	5.6	2R	0.294635	0.313394	2.82408	3.92711	0.0589018	0.334617	5.32099	3.11019	4.78856	5.90403	6.713	1.29045
CG13937	24	7.5	3L	0.706709	3.89711	10.8498	17.5245	0.128349	1.82926	14.2918	7.88563	21.8556	20.9712	14.9911	1.83628
CG13957	8	7.3	X	4.2485	1.9734	2.05845	2.13707	5.00612	0.80094	9.80451	4.2518	9.14332	9.18298	10.401	3.04202
CG13982	8.2	5.5	2L	0.125164	0.33374	0.736226	1.63462	2.97761	0.0285083	1.33332	0.572404	12.848	11.7368	1.28011	0.56526
CG13991	24	17	2L	0.00312336	32.5018	0	0.00529217	0.00297806	93.9061	0	196.44	0	2.37558	0.028123	289.6
CG13994	19	10	2L	9.87876	21.8052	8.3996	13.8703	31.1594	158.069	34.5063	213.451	46.5705	47.5794	111.293	705.557
CG14010	7.5	4.4	2L	0.0269586	0.194989	0.427198	0.753353	0.00102953	0.153538	1.11053	1.34824	6.92647	5.24709	0	0.158241
CG14015	19	9.3	2L	0.328518	1.70342	4.20885	7.11417	0.0215289	0.032389	2.63917	1.04963	4.97452	5.35751	0.444665	0
CG14020	15	9.6	2L	0.404838	6.42963	0.0678969	0.0223617	0	19.5447	17.9849	36.9507	31.8058	23.5583	21.5725	75.0098
CG14023	21	11	2L	10.9875	3.59178	8.65315	13.6601	35.402	2.42612	6.14832	3.7477	20.8655	15.038	14.2457	6.69295
CG14024	14	12	2L	0.11834	0.65245	7.17452	11.9141	0.00924823	0.0436468	2.72173	21.5135	25.3996	22.9246	0.369728	28.2066
CG14043	26	16	2L	15.9338	24.3861	4.98717	6.0793	21.7917	84.359	6.86938	70.9083	11.6059	13.1462	12.6147	116.31
CG14073	18	5	3L	4.25848	2.73954	3.24932	5.19433	15.4656	6.86846	4.05903	1.86138	15.6762	10.6538	8.32049	2.26564
CG14100	20	5.2	3L	9.17937	2.47378	1.25111	2.48808	15.2635	1.54838	3.27911	2.01398	5.63505	4.19893	13.0025	3.88848
CG14101	21	5.4	3L	0.0221279	48.2005	0	0.045825	0	434.342	0	188.738	0.192945	2.37699	0	301.182
CG14105	14	5.7	3L	0.924841	2.25018	2.06501	4.67199	0	0.0318777	25.5067	6.70496	34.7644	43.8754	11.5571	0.578278
CG14120	27	7.1	3L	4.82584	9.32311	0.014676	0.0323574	0.0138509	7.16404	27.8437	15.5796	0	0.565942	74.4756	1.87749
CG14126	16	6	3L	0.219262	0.840806	0.492845	0.519531	0	0	0.485973	1.64161	2.4909	1.48058	0	4.44188
CG1416	17	11	U	26.098	8.61112	11.0219	16.9012	84.5495	41.8398	19.6702	65.8203	20.789	20.89	68.6798	180.028
CG14168	15	5.5	3L	0.161362	0.618877	0.0508261	0.0130365	0	0.0935042	74.7901	34.7711	55.7615	8.2149	0.914211	0.051483
CG14182	25	6.7	3L	4.12004	2.81775	1.30474	2.77131	3.17837	1.07822	5.64868	4.11296	5.30897	1.41064	3.1177	2.84508
CG14183	14	9	3L	0.897086	14.01	0.321677	0.290083	0.250247	37.1198	0.025077	208.314	0.281057	3.42955	0.17243	421.424
CG14184	11	6.3	3L	14.8503	12.0843	24.097	24.176	45.0744	13.9207	65.3679	42.0625	22.2517	24.6292	31.5248	24.7653
CG14194	14	13	X	20.9335	12.3805	35.1804	35.0463	68.506	56.0548	16.7806	204.712	13.7842	13.2128	7.03764	94.4396
CG14195	13	7.6	X	0.580245	3.64455	0	0	0	1.21093	3.32253	3.85342	0	0.065923	14.2302	1.02164
CG14196	20	12	X	1.18209	3.7034	1.32752	1.73797	0.104237	0.682537	8.69421	3.34789	5.13855	4.52029	7.54008	1.02538
CG14207	9.7	7.9	X	7.97254	16.1032	32.9702	34.1605	21.6686	11.3005	893.766	722.876	719.756	698.932	343.56	560.494
CG14222	25	13	X	19.8246	5.29984	11.9407	12.0161	53.5149	7.01478	30.5577	42.0937	22.9173	20.4134	23.2736	37.725
CG14231	18	8.9	X	9.98466	3.32431	1.53939	1.63483	6.6362	5.34084	4.39583	1.84839	3.39859	6.21348	5.71897	1.31466
CG14232	19	13	X	11.9372	17.8906	13.2605	17.7262	23.6787	61.17	23.7482	32.8245	20.0048	19.5048	24.8925	20.9689
CG14234	19	10	X	0.183356	1.44901	6.28049	12.3139	0.0217472	0.295914	3.45567	4.67123	6.37809	6.3018	2.33982	1.15044
CG14246	14	8.5	3R	4.11922	16.238	0.188099	0.234826	0.0234074	10.9561	35.5443	13.4435	19.9972	30.9065	174.201	0.822627
CG14274	14	7.5	2L	0.139208	0.670408	3.41689	4.99034	0.00872819	0.0526349	1.90459	0.798888	3.02535	1.82	1.26969	0
CG14277	10	7.3	2L	3.60686	15.125	10.9143	20.6272	0	0.601387	100.833	43.2814	300.069	361.485	0.348276	0.504021
CG14282	18	12	X	0	20.8563	0.0055667	0	0.0493653	214.475	0	707.014	0	10.1651	0	598.135
CG14286	16	9.4	X	15.2988	3.01376	1.6558	1.68793	20.7909	6.73788	9.48397	13.0722	10.2077	8.69407	43.986	35.4513
CG14290	12	8.6	3R	32.262	73.8013	31.2175	34.9891	27.9439	43.8394	77.4413	108.103	90.2295	63.8693	39.1439	202.816
CG14291	16	9.8	3R	0.44875	1.27699	1.19583	2.94939	0.242421	1.25455	6.37013	2.50532	10.7355	16.9803	5.92604	0.383786
CG14299	23	12	3R	18.9735	3.95172	2.58148	3.45376	8.68759	1.34988	10.0329	4.17912	7.11366	8.29989	11.0268	1.28437
CG14301	17	9.2	3R	0.0301371	0.152434	0.0912065	0.209036	0.00739106	0.672036	3.44027	2.12917	8.44109	10.1331	1.60671	0
CG14305	17	12	3R	0.119324	62.768	0	0	0.0344313	232.847	0	473.173	0	8.75363	0.332727	398.853
CG14321	19	5.5	U	0.28152	1.56222	2.24158	4.25953	0.0419242	0.0753183	12.0175	97.4958	34.6211	38.0855	35.2174	274.897
CG14322	8.2	6	3R	1.98756	0.831502	1.01506	1.38676	7.68303	0.724069	2.10307	2.02633	7.93432	6.53296	5.05232	4.52147
CG14353	18	5.4	3L	3.46009	10.9311	1.65616	2.29437	4.60958	59.3731	2.82907	141.003	3.31206	7.50655	7.65281	317.505
CG14367	18	9.9	3R	2.35819	11.4759	0.67564	1.27033	0.0284901	0.0114712	2.34509	2.71183	2.10776	2.3746	0.574135	2.71813
CG14394	21	9.9	3R	0.930766	1.8087	0.0718549	0.249639	0.103359	0.0678307	9.04966	12.081	35.306	2.93127	15.5268	0
CG14395	25	17	3R	0.00310218	0.586444	0.00186218	0	0	0.625268	0.373782	2.28017	0.930411	0.856406	0	1.07291
CG1440	8.2	4.9	X	32.3348	20.2704	7.96626	10.2811	51.1302	26.5649	48.3091	401.788	38.2853	47.5107	82.523	308.733
CG14407	14	10	X	27.5852	40.5994	13.6923	26.6145	27.0715	66.4095	156.47	92.7389	135.051	147.808	88.3857	126.239
CG14408	12	10	X	6.19264	5.18085	12.8901	17.7219	11.0308	1.05361	3.2793	1.57394	13.8918	14.9386	0.830538	0.811438
CG1441	10	5.4	2R	0.795131	3.34363	3.28686	6.36762	0.0257222	0.3559	20.0031	5.79185	13.5442	15.9113	3.99814	0.226636
CG1443	16	9.6	3R	0.787155	2.49609	2.55246	2.60605	0.0251181	0.578865	9.19871	3.95195	27.9101	32.2275	7.32053	0.642465
CG14431	28	16	X	0.300065	0.163753	0.477511	0.759641	0.00215901	0.0872375	5.12854	0.256519	1.22956	0.461603	0.13946	0
CG14439	12	8.8	X	1.20023	3.69034	2.07873	5.23534	0.0141041	0.4126	41.2669	7.30446	52.9367	41.6032	9.40426	0.110055
CG1444	17	8.5	X	31.9717	51.146	36.1153	45.0552	35.7222	42.4531	142.084	110.463	173.761	298.061	225.68	28.6855
CG14442	28	14	2R	21.6704	5.59813	16.9301	20.6269	72.2277	1.89317	10.5593	62.4168	13.2122	13.6326	13.647	80.3188
CG14446	26	14	X	5.6566	2.82087	20.1949	29.6988	15.4446	0.712951	31.1691	29.0531	39.4963	48.1616	20.1767	13.3357
CG14450	20	5.4	3L	8.4551	3.36579	5.09986	7.73284	20.0726	8.20636	9.99115	3.44522	14.3511	11.9734	10.2257	2.58678
CG14464	21	12	2R	19.2447	2.56589	9.19518	10.7364	55.7474	6.18177	43.7373	39.8557	12.9887	17.5189	24.6064	15.5521
CG14471	19	12	2R	1.2986	0.941948	1.8855	2.39336	2.16941	2.10206	2.1956	1.67241	4.16337	2.85605	5.25539	0.985357
CG14476	29	16	X	49.0727	47.7424	49.8374	58.0451	60.7138	87.7813	72.2214	92.0199	30.6729	40.2617	352.401	46.4065
CG14478	17	9.6	2R	18.3686	4.29044	22.7013	31.5179	89.8552	4.52363	17.6301	55.7496	95.3358	51.7361	57.0753	241.293
CG14482	21	12	2R	67.8463	133.275	8.18823	15.5152	12.1014	10.1782	611.785	228.997	189.07	256.033	73.8177	14.0313
CG14512	20	11	3R	4.7482	1.5607	11.0361	10.0365	29.2806	5.89219	16.9315	12.8076	10.4532	24.7764	29.8957	3.03053
CG14516	20	11	3R	30.3627	1.228	0.943521	1.65564	55.3137	0.971288	5.58688	15.0164	2.22633	3.19872	6.32083	8.36278
CG14521	17	9.6	3R	0.0154278	0.122833	0.512084	0.702089	0	0.0202791	1.51957	0.978812	9.22653	8.57817	0.08395	0.235674
CG14528	14	8.4	3R	1.8006	2.98115	8.44881	11.3276	0.00756577	0.0422631	5.11425	12.8023	14.1128	17.1473	43.4416	10.631
CG14535	13	9.1	2L	0.0550841	0.261128	1.76167	2.81966	0.118748	0.0142545	0.902361	0.989956	3.52946	3.17846	0.719788	1.42799
CG14543	15	10	U	12.0143	6.74613	12.2175	21.9857	35.7129	79.8466	44.9921	42.2372	34.8834	48.7568	63.6421	45.4766
CG14544	15	9.8	3R	5.73227	0.395354	0.531109	0.577798	5.33288	0.694976	2.7949	3.07661	1.41839	2.40115	11.2355	7.49754
CG14562	27	7.2	3L	5.18011	2.26521	2.57638	4.01748	9.57307	1.64177	16.2835	105.227	23.0771	27.1346	12.3444	79.2266
CG14590	28	15	2R	0.425556	2.78043	0.471693	0.62102	0.0258947	2.89529	9.18978	94.1791	23.4498	16.7656	12.8781	73.1904
CG14607	16	12	3R	0.336197	1.02641	0.306129	0.393196	0	0.00918948	19.6126	3.78389	1.57778	0.697968	30.1944	0
CG1461	17	7.6	X	7.06808	9.18484	42.2868	62.3708	0.0439111	0.402106	300.896	63.6275	80.7223	98.1775	42.7259	2.15325
CG14613	16	8.3	X	14.2965	11.5458	6.86714	10.2548	35.1316	42.5348	31.498	321.004	10.688	17.9228	18.3385	327.642
CG14614	12	9.2	X	15.6151	3.9445	15.1227	12.9187	75.7928	3.51713	24.2382	35.388	12.0391	6.99503	17.8494	35.9067
CG14619	18	14	X	4.71374	7.20019	7.82589	11.5117	7.32784	11.4902	5.9924	123.72	22.1484	17.3441	8.07621	246.841
CG14621	16	9.7	X	11.8363	7.3186	4.19877	4.85072	13.7165	6.87178	25.7782	30.9079	20.6894	24.8938	30.8627	24.7621
CG1463	16	11	X	6.60914	1.46857	4.48807	6.61118	14.6521	1.06529	7.05995	2.75099	4.01355	4.37032	10.0876	1.60286
CG14641	19	11	3R	28.3168	15.7956	10.0154	10.1687	42.2473	58.7627	19.9208	19.1534	19.9018	15.4927	28.5467	72.6695
CG14642	28	15	3R	0.215944	2.48777	0.598611	1.58767	0.0469834	19.9278	5.76297	4.66289	41.3741	39.1155	28.0367	1.9363
CG14646	26	13	3R	3.44508	2.34508	6.89521	8.38407	8.15401	4.896	13.3997	73.2601	11.2184	10.1766	14.829	95.3653
CG14651	31	15	2L	0.00508439	7.7429	0.75049	0.298376	0.0652547	19.4444	0.149398	68.7869	0.12531	1.35625	0.307503	121.515
CG14654	26	7.8	U	0.125267	1.70053	9.43939	27.9078	0.0420789	5.70712	6.93279	5.62721	11.9889	11.4564	20.1219	14.4262
CG14655	18	11	3R	0.983955	3.33998	2.33986	1.60396	0.099797	0.868083	3.86174	0.881652	2.52723	1.77029	1.00865	0.198115
CG14661	23	14	3R	17.4875	19.1597	46.2558	68.7459	0.374514	1.03066	665.883	228.926	293.613	400.789	273.152	3.67946
CG14669	13	7.5	3R	0.0725616	0.865413	2.58754	2.46532	0.0296065	0.131383	1.54825	6.19693	8.66683	9.59646	0.133912	0.565555
CG14683	18	9.7	3R	20.322	10.1304	15.8812	26.9876	56.1672	21.7946	71.7263	31.3369	55.9919	55.8469	28.5309	2.64873
CG14687	27	18	3R	8.7897	24.1989	127.09	148.572	2.87206	5.85719	213.786	88.7419	438.565	468.863	159.936	13.3496
CG14688	13	4.7	3R	12.5225	8.08016	14.4506	14.8368	8.14133	2.71372	109.417	64.0971	111.322	124.694	112.062	4.8459
CG14691	7.5	5.9	3R	0.0108769	7.4297	0	0	0	7.65032	0.048067	164.447	0.126157	2.49672	0.294313	160.899
CG14696	17	10	3R	0.420187	1.80996	0.85044	1.71311	0.0691211	3.93248	27.4851	8.18392	32.1683	32.5792	15.0294	6.68958
CG14701	8.2	5.5	3R	5.89168	2.3645	1.12078	3.33596	3.4507	1.51016	63.9388	15.1113	14.9558	16.0433	42.8048	16.3188
CG14710	29	16	3R	6.25713	1.51801	1.94215	4.32369	21.1809	4.62728	3.00274	1.77434	6.0981	0.554222	1.01996	0
CG14711	22	15	3R	13.8191	5.70883	3.88948	6.25821	40.6783	21.2381	4.67295	63.9877	4.23498	5.98371	8.27589	113.605
CG14722	26	15	3R	16.4965	9.38871	12.9369	14.2979	39.3994	24.9916	16.5098	23.2764	14.8047	15.2102	28.5457	22.6504
CG14741	20	12	3R	0.297654	1.65074	2.34232	4.35339	0.160635	0.790366	5.87006	4.4894	13.0216	12.4135	5.68387	1.21885
CG14757	18	11	2R	6.67084	49.1778	12.5069	21.7315	3.09973	119.968	626.868	409.838	440.161	494.42	174.8	193.589
CG14762	20	12	2R	4.917	13.6109	157.615	230.639	0.311882	0.744729	32.348	13.6697	110.506	105.058	16.6223	0.707197
CG14763	13	9.6	2R	3.57592	12.8135	0.197378	0.9359	0.265033	89.7686	0	254.995	0	8.84885	0	256.337
CG14764	17	9.8	2R	1.55251	5.84863	3.50339	4.46511	19.1695	0.851788	7.56992	3.58248	34.9159	24.8423	26.5491	3.23927
CG14767	21	13	2R	16.3537	20.0551	19.5607	34.8999	18.674	8.61596	81.145	93.4994	80.2311	75.4243	92.7934	91.9508
CG14777	19	9.4	X	5.73838	16.2822	7.89065	12.6531	0.870618	2.03055	38.6218	16.8312	92.1919	100.677	54.7769	4.24437
CG14778	11	8.1	X	3.74037	13.2635	3.10546	4.77928	0.257751	0.958701	52.59	209.648	79.2704	77.1014	2.03368	117.858
CG14780	10	8	X	0.423694	0.609669	0	0.117244	0	0.150316	8.31956	2.97133	2.08549	5.88228	10.7786	0
CG14786	11	9.8	X	8.6538	7.36624	3.04136	4.11674	5.60133	6.02729	9.82128	9.94353	8.40225	10.0249	11.5171	7.57055
CG14795	15	7	X	0.73859	1.31851	0.862563	2.63556	0.143895	0.16425	89.0939	36.6325	75.0914	100.556	44.0127	1.97044
CG14814	14	11	2L	47.6126	2.72239	0.972485	1.60834	206.301	7.98743	8.46468	15.1725	16.3827	16.988	13.9979	42.1837
CG14817	20	11	X	26.3667	19.4049	22.093	27.5448	47.5827	49.8633	17.4632	15.9277	24.3527	29.9518	35.2216	9.27645
CG14820	25	15	3L	2.34919	3.09447	0.0875054	0	0	0.376144	6.69706	4.80223	0	0	39.0211	1.71569
CG14830	14	4	3L	0.451945	1.49858	1.05486	1.36308	0.0968705	0.261419	12.7475	2.96047	31.2734	24.17	18.3387	0.460519
CG14838	23	7.6	3L	0	4.39579	0	0.0191514	0.0128647	20.2491	0.153744	35.5635	0.249644	0.66861	0.174542	44.6037
CG14841	26	14	3R	0	5.56786	0	0.0556907	0	35.1579	6.31404	10.365	4.42922	5.32196	5.42746	13.4761
CG14853	17	11	3R	0.13557	0.926551	6.8499	18.1206	0.00529168	0.0095125	2.55551	1.08959	12.7534	14.6868	0	0.157647
CG14880	18	12	3R	0.278543	1.57551	2.98384	4.67864	0.00728041	1.95108	5.55044	2.91328	39.9898	28.0076	9.85787	0.935793
CG14881	13	10	3R	8.32425	2.02756	0.722042	1.81996	6.08645	1.32994	8.08926	4.42284	4.01584	5.39107	5.50121	1.54492
CG14883	8.3	5.2	3R	11.3935	2.3457	6.59813	10.4826	56.6612	1.53592	1.61893	240.402	0.857293	4.64609	0.795541	122.155
CG14894	18	13	3R	24.1848	21.5596	14.4645	20.1667	79.7039	97.2722	12.0289	185.544	10.7302	11.7743	18.604	213.273
CG1492	19	11	X	1.68433	1.64719	0.604428	1.31056	1.10737	0.0492502	3.08244	1.10315	4.71079	7.43451	0	0
CG14921	17	11	2L	0.239428	13.4868	0.0580037	0.119032	0.32729	72.6032	0.395609	422.033	1.21527	8.15942	0.620599	402.091
CG14945	14	7.6	2L	2.74396	4.52391	5.87223	11.4696	0.114643	1.48174	9.54538	9.88529	19.3138	26.9414	21.5552	1.23451
CG14949	13	6.4	3L	7.44042	12.043	0.0743034	0.0846228	0.167629	1.71611	57.3906	31.6911	0.845102	1.78699	234.79	11.0302
CG14963	24	6.4	3L	3.55043	15.8577	0.366729	0.126081	0	1.13791	295.3	114.798	0.132691	2.36462	1426.23	98.8251
CG14964	21	6.7	3L	0.961497	5.64235	4.7605	4.39079	0.266647	0.102676	11.7165	3.47444	24.889	23.64	4.43691	0.105389
CG14966	20	5.9	3L	9.49534	4.40341	1.02545	1.31626	5.94906	6.60997	7.53676	11.3834	3.65686	4.33398	20.4546	12.8365
CG14967	24	6.6	3L	9.19065	5.23252	3.05056	4.07281	20.6997	6.74086	3.35175	19.7826	4.66634	4.96686	6.51298	21.3133
CG14968	13	7.1	3L	1.15795	9.71516	0.117477	0.140022	0.0200526	6.98879	6.77777	3.86239	2.89768	3.05508	42.898	0.886588
CG14971	22	7.4	3L	6.90986	4.79098	2.71255	4.62988	11.1139	7.91585	2.25877	2.50974	3.1803	2.9222	5.05102	2.20733
CG14980	26	6.7	3L	5.63351	5.39916	2.32831	3.63063	3.58221	5.02713	31.1052	17.1227	39.5234	28.8609	40.0494	15.5803
CG14982	15	4.9	3L	0.19057	2.13212	5.95399	12.0436	0.0153723	0.635911	3.65024	1.32619	20.3432	22.7184	0.112566	0.051441
CG14984	20	11	3L	1.17596	5.65684	3.17769	5.59727	0.00702245	3.93727	54.4886	71.5766	241.24	302.247	173.205	81.1531
CG14997	23	11	U	4.89092	10.0209	3.02551	4.03543	6.35614	19.9713	191.14	126.703	206.508	264.981	276.167	9.46733
CG15012	26	7.1	3L	22.4381	20.1331	14.9188	25.0005	21.3471	32.1451	177.75	129.15	34.1172	24.8215	32.7741	6.25574
CG15080	15	9.2	2R	0.0564085	0.0719318	0.294442	0.28145	0.0399354	0.0836799	5.59062	2.03139	23.3822	11.7236	5.5502	0.658087
CG15082	21	10	2R	0.0446304	0.515146	0.284293	0.710931	0	0.0175227	5.87272	3.0581	7.45624	3.76969	0.932021	6.00274
CG15084	27	12	2R	5.07529	2.9663	1.34231	1.95687	4.782	5.37628	6.5082	66.1934	5.27735	5.31699	13.8872	90.1676
CG15087	21	7.6	2R	6.29038	3.96431	3.24973	7.12196	16.919	16.652	8.53616	7.82949	14.4379	11.2323	16.9122	8.2586
CG15093	10	4.9	2R	66.329	49.9648	38.3215	43.2106	53.8168	16.9653	203.759	72.8744	221.413	229.282	499.047	23.5282
CG15097	21	10	2R	0.238089	2.40002	1.43067	2.89093	0.0491959	0.391195	3.0928	1.25604	7.6567	10.6277	2.03201	0.569509
CG15099	27	15	2R	11.6937	7.17951	6.36851	9.79245	20.214	5.68756	8.65842	39.5767	22.765	21.2168	18.7663	40.2201
CG15100	14	9.4	2R	21.7643	14.8311	3.50734	5.27496	29.5696	32.9665	14.0588	21.2681	22.4651	16.3517	32.6636	53.4242
CG15117	18	10	2R	0.457116	9.50169	0.891111	1.78957	0.386935	8.49659	16.9425	16.2167	12.7745	18.6779	61.7041	2.75487
CG15118	22	11	2R	7.45484	10.6837	6.76137	9.63442	4.84929	10.5029	28.2897	70.371	42.5525	52.5048	19.0041	68.0873
CG15128	24	13	2R	0	44.2789	0.00345555	0.0355541	0	81.7418	0	405.858	0	3.90512	0.083166	315.94
CG15143	25	17	2L	0.142626	3.03584	0.00186942	0.110146	0.00890416	6.97013	0.110265	51.4394	0.449111	1.66675	0.334869	95.3567
CG1516	29	16	2R	11.4172	16.7817	18.7783	29.7106	11.3042	13.7774	73.7033	81.8187	185.716	169.4	300.836	83.0899
CG15168	18	9.6	2L	25.1351	12.6786	14.9543	15.232	55.1485	24.8637	41.3622	107.343	87.4465	97.9432	148.46	332.268
CG15170	20	9.2	2L	1.72558	1.15797	0	0	0.00827387	0.156331	0.298685	2.73828	0	0	0	3.16992
CG1518	11	6.8	X	35.0712	5.83587	7.31971	9.96777	53.2126	7.88198	17.3402	31.1	8.55629	10.1462	18.033	21.8006
CG15186	15	10	3R	0.153665	0.773917	1.81372	2.21284	0.0518571	0.227181	1.54363	0.595747	5.17175	3.6636	3.39991	0.429284
CG15211	11	5.6	X	0.891688	2.17841	1.90941	2.36707	0.0755446	1.26985	141.703	83.274	98.133	148.505	137.595	8.98156
CG15221	8.4	5.1	X	1.65318	3.88732	0.0933346	0.0428354	0.0852794	0.034203	7.81842	4.26034	0.78837	1.49073	6.66919	0.562777
CG1523	25	13	3R	10.6977	5.48248	4.4045	7.12565	17.134	9.09581	7.7433	10.1724	15.9451	13.7523	18.4035	16.3481
CG15239	23	11	X	0.00414149	0.230041	0.0250848	0.00120561	0	0.0836311	3.96501	1.40101	0.957635	1.37861	0.935511	0.111065
CG15247	17	11	X	0.968805	3.95291	11.5451	3.83591	0.0967129	0.509919	11.7676	4.0256	20.0875	20.2012	3.61457	0.10769
CG15249	14	7.5	X	0.0044901	0.00569302	0	0.00390408	0.00142707	0.00417296	3.51032	1.28777	2.17113	2.92624	1.60634	0.844965
CG15309	14	9.5	X	2.22698	2.19337	15.8048	16.5044	16.2462	13.2931	53.667	34.5567	77.4603	51.0025	44.9435	29.0383
CG15312	21	11	X	1.96663	0.533861	4.43365	6.39662	5.9642	0.0486101	7.57661	1.85584	8.6536	10.0605	7.21773	1.80492
CG15347	21	11	3R	16.4399	28.8175	0.310158	0.976352	1.92072	9.8538	7.67249	8.72954	2.12442	3.11551	19.8826	5.59525
CG15390	19	13	2L	3.32473	1.19009	3.80767	3.20876	13.9155	1.32483	14.4204	184.84	8.38295	11.6985	13.0138	223.841
CG15406	23	16	2L	6.58655	29.0623	0	0	0.140215	16.2687	30.1233	19.6881	0.10203	0.277622	68.5998	2.36658
CG15412	22	11	2L	3.37592	12.2694	4.621	3.12867	0.0781318	1.02355	11.7216	162.561	14.2514	19.4606	9.657	120.306
CG15414	15	9.3	2L	0.0243663	0.0706967	0.205943	0.172353	0	0.00469812	4.01577	2.5992	8.95613	9.30605	2.5101	4.65569
CG15418	13	8.1	2L	2.59857	12.5515	0.741526	0.258711	1.16725	199.901	1.89104	85.1198	5.91727	4.73071	1.28496	153.257
CG1542	25	15	3R	27.9045	9.53641	10.846	10.7806	60.6029	76.635	22.8993	21.1766	14.4587	10.0178	38.0632	36.6008
CG15431	19	9.9	2L	0.117787	0.992564	0.681737	1.31462	0.0319656	0.0435722	0.88808	0.500873	3.06917	3.30777	1.55217	0
CG15434	19	14	X	4.85321	28.3479	0.00692199	0.0353058	0	41.046	8.62525	2.91485	48.7709	25.6136	20.1513	1.25039
CG15435	27	16	2L	8.67429	4.53012	2.21952	2.5646	24.9273	35.7602	2.34418	6.23666	6.10253	6.07901	4.57962	8.86222
CG15439	14	8.9	2L	8.88398	1.88609	2.698	2.95752	26.628	3.73133	1.72563	7.57131	3.31036	2.50913	7.39098	20.398
CG15443	24	12	2L	9.03012	6.11903	5.20418	7.08236	14.2467	3.58773	1.35743	6.82153	1.17384	1.09905	3.09636	1.57009
CG15449	12	7.5	X	0.64699	1.19028	1.09323	1.3666	0.0155368	1.47345	5.46999	4.7391	17.6876	17.3633	0	1.79371
CG1545	8.6	4.3	X	0.211307	0.846042	4.27241	8.5462	0	0	34.1499	7.38965	78.3294	93.036	0.437366	0.627597
CG1550	14	6.5	2R	12.5489	6.90117	6.70844	8.18534	12.3447	8.97193	10.1683	26.0741	5.7796	7.62162	19.2467	14.569
CG15515	18	10	3R	0.519651	2.82956	0.777212	1.57114	0	0.0600826	84.7297	30.469	66.1029	68.0046	70.8105	3.53818
CG1552	12	5.1	X	2.00336	9.55064	31.8702	40.8361	0.014375	0.406181	26.8955	5.59809	30.5862	45.9698	1.03843	0
CG15525	12	9.5	3R	7.39111	6.0106	4.98846	7.18324	28.2202	35.1186	14.5429	10.0839	10.7954	11.2833	41.8148	27.8804
CG15528	14	5	3R	0.567928	3.69836	0.381796	1.49965	0.0236819	0.0285107	4.86261	3.17778	8.667	7.52635	4.90814	0.213167
CG15535	16	8.6	3L	6.43846	1.67034	15.0497	15.0794	36.9012	19.7216	3.62098	1.71038	9.96027	11.2856	0	0.466632
CG15544	20	11	3R	0.0345795	0.177133	0.336163	0.443782	0.0170439	0.016439	1.23002	0.82681	12.1181	8.23789	1.62241	0.177154
CG15546	14	11	3R	1.65637	7.72592	5.17941	5.14856	0	0.0259927	54.2203	8.7999	36.5642	25.9543	13.3843	0.211914
CG15602	13	9.3	X	7.14518	5.24529	10.4205	12.5923	26.9347	15.7864	18.7152	26.7896	23.2081	17.1619	22.6531	24.167
CG1561	17	10	X	10.1057	28.2285	225.624	291.779	0.0303875	0.487955	4.82225	4.31897	10.093	14.433	0.443911	0
CG15611	16	9.3	2R	1.68829	4.03256	2.22039	3.36022	0.609971	2.22185	13.6067	6.01083	20.1663	20.2974	17.7879	0.933559
CG15628	15	7	2L	2.19901	14.6372	18.2686	38.8802	0.0638802	0.0889996	22.0314	8.52133	62.9231	55.4311	0.587171	0.168644
CG15653	20	8.9	2R	6.83278	2.6252	0.595463	3.04254	17.2373	39.2256	25.0653	21.0858	27.3457	29.436	16.267	31.8816
CG15661	21	11	2R	0.802714	1.37613	7.24086	7.2048	0.219572	0.0512913	1.0016	0.807081	8.95186	8.14097	0.304724	0
CG15666	13	9.1	2R	0.0831379	0.33114	0.0874268	0.506826	0	0	1.97009	3.56649	1.61376	2.79405	1.72163	6.03217
CG15706	17	10	2R	2.30371	2.94682	0.722622	1.48894	1.81292	0.820787	3.78886	2.53177	4.18658	3.33591	9.57848	1.35137
CG1571	9.9	8.3	X	0.0142876	11.5483	0	0.0732673	0	27.8926	0	141.258	0	4.0561	0	329.786
CG15725	8.9	5.3	X	0.133524	0.404765	0.69481	0.669323	0	0	0.57579	2.83431	8.22158	5.94247	1.53597	5.64886
CG15729	12	7.6	X	0.0413358	0.288831	0.250646	0.518111	0.0139051	0	0.518633	1.13933	7.18217	4.54561	0.120666	0.165439
CG15735	12	6.6	X	27.1926	7.01183	18.5157	25.7968	68.9603	9.86895	38.7507	261.72	34.6044	42.3799	77.1968	307.518
CG15743	6.4	5.5	X	14.246	5.90888	1.76059	2.62682	12.6139	4.96562	12.1135	30.8475	13.3628	17.862	19.8716	11.7979
CG15744	17	10	X	8.49395	2.18548	2.04531	3.23413	14.0307	5.19241	0.944538	5.39849	1.7735	1.5601	1.89755	14.3149
CG15745	16	9.1	X	7.00912	9.55128	5.31239	9.4514	0.56928	2.15507	7.88336	3.66777	24.6057	18.0306	41.7918	3.10786
CG15747	23	13	X	4.07331	1.9651	7.191	7.87501	13.9109	5.95357	11.9877	9.71449	12.4505	10.1982	21.5382	19.7391
CG15765	16	12	X	0.297879	1.85153	26.8969	37.0221	0.0354917	0.0525591	12.1638	7.57442	90.6608	80.6863	0.276309	0.578629
CG1578	11	8.7	X	19.2286	5.4559	10.368	12.5292	29.8533	1.25334	25.525	21.9869	34.7783	27.8417	22.4266	23.6007
CG15803	19	13	3R	0.0344886	0.242491	1.18355	1.6901	0.00297305	0.0681128	0.937847	4.14371	12.9378	9.18227	2.24827	12.7534
CG1582	19	12	X	14.253	10.7238	3.28144	4.47572	17.6066	16.0663	4.05653	6.88511	3.39992	3.83318	7.12108	6.79283
CG15822	17	5.8	3L	0.637593	0.92674	0.589619	0.649245	0.942358	1.5148	5.17065	2.04304	5.25735	5.29677	5.5882	0.851419
CG15824	19	10	2L	0.0173366	9.10041	0.000959791	0.0433126	0	22.0487	5.34406	47.2366	3.47611	3.61377	4.8642	51.4196
CG15829	17	6	3L	3.40037	0.865853	0	0.342426	0.143163	3.86015	131.124	120.704	0	28.5694	2881.13	25.4048
CG15831	14	7.7	2R	0.00533485	0.00681937	1.25574	1.94992	3.31459	13.0698	7.37532	3.3355	17.8119	7.23579	0.447935	0.875083
CG15863	11	8.3	2R	5.26128	1.92211	3.27113	2.90429	15.7566	8.43941	21.1554	9.92359	12.7415	13.4775	11.6876	5.0626
CG15877	20	6.2	3L	12.2888	2.23264	2.76704	2.72512	22.8993	27.5418	9.84748	9.07911	12.0906	9.49266	18.8695	13.0358
CG15881	21	6.4	3L	9.05291	2.48677	1.28982	2.24408	9.87595	2.3749	13.4424	29.0425	15.575	15.8972	57.7654	53.3775
CG15890	15	8.4	X	0.516675	0.561738	1.20179	1.52889	0.116797	0.881343	5.26538	2.53143	14.2504	12.6991	1.41551	0.467679
CG15892	18	7.6	X	0.412899	79.7398	0.475958	0.658229	0.00662839	268.512	0.10762	298.402	0	6.58706	0	857.233
CG15896	13	8.4	X	7.59959	2.96129	0.915472	1.48046	5.41516	4.07377	6.9622	5.59476	6.03358	5.94443	7.46192	9.42533
CG15914	16	8.5	X	2.62724	1.06096	0.251249	1.26837	5.78643	2.33196	2.21055	1.90013	5.25516	1.26229	4.26981	1.28347
CG1597	25	12	X	14.8973	9.47537	3.54408	5.60075	10.2608	16.6364	5.98539	40.9117	11.7738	10.8736	16.8014	71.595
CG1598	18	11	2R	27.0201	26.0402	12.284	20.2915	35.0712	60.967	60.2467	248.753	29.1984	34.0762	68.8808	244.15
CG1600	10	7.7	2R	2.81312	7.1479	15.6052	19.7152	1.13081	0.828507	144.748	110.973	440.103	468.621	275.541	19.1171
CG1607	14	9	3R	0.700289	1.98156	6.04612	10.0617	0.0585004	0.095845	85.5518	21.2152	33.6667	38.4955	20.0136	0.280599
CG1622	16	9	X	18.8398	2.77535	13.7128	13.7638	138.303	11.8887	5.94786	4.07456	5.19472	5.51003	7.77702	3.65892
CG1628	11	8.7	X	2.63239	6.38933	8.72254	11.094	3.39169	53.8608	101.091	227.468	7.67935	16.6726	36.9705	182.399
CG1632	19	12	X	0.804913	0.3725	1.4339	1.46884	0.0181263	0.275063	4.72044	2.37476	8.17704	7.14287	3.05643	0.632155
CG1637	29	13	X	14.4049	14.0475	9.34447	12.89	14.0646	12.0423	47.8481	64.6508	42.3383	45.2826	55.7417	50.768
CG1646	27	16	3R	10.6057	8.77256	18.8288	27.5542	17.5236	16.5888	19.9704	15.4697	42.3859	31.0773	41.5133	21.0818
CG1648	11	7.9	2R	6.49595	56.2737	23.5724	31.3014	1.37158	16.4496	905.803	311.297	341.207	408.614	311.503	11.8989
CG1657	13	9.8	X	12.2492	6.68277	6.44901	11.6681	16.1043	2.2205	17.1744	9.53456	23.7009	24.7798	25.6741	4.17203
CG16700	8.2	6.8	X	2.37205	2.29293	4.00004	6.32627	6.59209	0.211157	12.3434	295.838	13.776	19.4733	19.9949	465.038
CG16717	18	5.1	3L	9.67139	4.27898	1.62088	2.50002	10.7242	3.39961	13.015	7.37366	9.7561	6.18263	15.6473	10.4403
CG1673	17	9.9	X	7.49139	13.657	16.9017	36.9216	6.44715	2.31334	2414.02	503.407	1165.49	1460.23	1130.08	46.1952
CG16749	25	16	3R	34.4355	50.2354	0.371173	0.807722	0.26829	8.04422	52.4841	32.3966	0.213725	0.190488	714.618	22.2465
CG1677	21	12	X	2.53482	1.91645	2.37467	3.21954	6.74391	2.41675	46.9775	42.6798	32.4616	37.0342	49.9571	32.2006
CG16771	17	9.7	2L	2.7516	3.35706	3.33525	5.1809	1.62014	2.15006	5.92916	5.60148	3.20992	7.48514	25.9575	4.51114
CG16778	19	10	2R	0.0444977	0.236078	1.04337	2.0143	0.00431495	0.447888	0.18176	3.64909	1.60484	1.22177	0.389746	10.5485
CG16779	22	17	3R	0.119497	1.14231	1.80025	3.70238	0.00855809	0.929638	2.38798	0.788309	7.8025	4.64388	0.561297	0.563708
CG16786	26	16	2R	0.0785906	0.531302	3.93865	4.96571	0.0253929	3.14133	20.1511	11.523	75.793	68.4966	34.3637	1.57052
CG16787	28	12	2R	10.2684	9.58158	2.6603	3.69995	8.27191	15.3313	50.8963	52.883	72.748	57.4621	60.9664	48.7956
CG16790	22	11	3R	2.77722	2.57457	0.636005	1.96065	4.72571	1.14753	8.51769	7.07561	1.53594	2.86809	14.195	12.7652
CG16791	14	11	3R	0.443872	1.80445	8.68182	13.7289	0.210167	0.607319	8.51866	5.96422	35.1818	32.4756	14.2276	1.53036
CG16799	24	17	2R	2.67569	6.79852	5.99584	3.57781	0.0702332	3.0979	98.5568	49.3351	186.081	184.295	326.364	18.1481
CG16812	29	17	2L	11.3076	7.01959	2.91642	3.51976	16.836	29.9451	35.8979	41.3847	28.123	23.8043	43.3322	50.7661
CG16817	16	8.6	3R	117.677	52.5164	69.4546	73.8572	359.539	241.091	1151.98	1026.7	133.201	131.055	548.452	580.432
CG16820	9.6	5.4	2L	0.351586	5.61501	2.10916	2.27492	0.0376816	0.917333	43.5912	20.1574	67.6677	102.898	28.9507	8.80025
CG16838	26	7.5	3L	19.5185	0.773309	1.08952	0.748406	64.0289	1.08327	1.84157	2.51937	1.25583	2.07005	4.71727	4.67576
CG16848	15	8.1	2L	0.187758	8.28151	0	0	0.0685411	7.57591	49.5426	447.292	62.5521	67.4746	41.8207	713.171
CG16853	19	11	2L	0.00793272	16.2329	0	0	0	29.7129	0.017701	160.999	0.14369	3.90348	0.123179	492.127
CG16857	27	17	2L	1.53701	7.56087	18.1249	27.7741	0.138478	0.632313	52.9473	23.3663	73.0563	82.5882	12.6061	1.33951
CG16865	21	9.4	2L	7.77447	2.55375	4.05175	5.82441	26.5987	17.6536	31.2888	22.3757	31.2837	24.0011	34.6615	41.7908
CG16868	18	12	2R	13.3849	3.00502	1.73529	2.01682	22.2292	2.18476	1.7823	0.879882	3.57896	3.17402	3.57065	0.73003
CG1688	15	11	2R	0.382405	0.811163	0.700982	1.04633	0	0.0730841	1.3203	0.99096	6.01567	9.07959	0	4.96991
CG16884	12	9.1	2L	0.119281	0.462327	0.228341	0.876128	0.096007	0.349068	105.563	51.2382	593.081	293.275	52.9579	8.45744
CG16886	12	7.3	2L	0.0367428	0.204881	3.84063	5.20331	0.327698	0.183953	45.182	43.7394	632.611	335.789	50.3233	7.57492
CG16903	13	4.6	X	23.2916	12.3698	8.73456	9.74953	34.3031	35.1468	17.1793	10.6039	19.1113	20.7957	29.688	20.3647
CG16908	19	9.5	3R	5.91461	1.51576	0.766663	0.85542	4.76484	0.120114	4.314	2.82553	4.22131	3.44183	4.54712	2.40911
CG16935	13	8.9	2R	14.395	18.916	6.11176	7.67875	7.79576	30.3453	22.4797	216.047	23.0759	22.2118	19.8446	214.968
CG16940	26	7.5	3L	16.4707	10.6457	6.12049	8.00602	40.2171	15.4963	5.00396	80.8197	8.64785	7.74174	8.87618	113.221
CG16941	28	15	3R	14.6288	5.31851	5.86178	7.7045	29.2597	10.2254	29.9372	14.0486	32.7753	37.9446	53.1594	13.7704
CG16947	7.8	5.7	2L	1.02254	0.998675	1.78566	2.45916	0.74015	0.135063	8.33071	2.62206	16.4666	12.6555	4.42926	3.56582
CG1695	27	13	X	0.32485	2.64134	4.1108	8.32889	0.0238179	0.252327	7.57944	7.55295	14.6553	18.5179	2.4517	3.80424
CG16952	20	11	X	10.4688	4.72302	8.51696	11.4546	17.3602	2.33178	3.56897	14.5989	12.1906	10.0738	4.63543	18.8189
CG16953	14	9	3R	21.298	21.3242	98.352	79.3458	33.2094	27.1037	68.2873	28.6232	95.2848	80.1606	92.0031	18.123
CG16959	14	3.9	3L	0.18555	2.78375	1.27564	0.757385	0.0382656	1.22479	0.642569	1.22989	1.10479	1.04913	1.30877	0
CG16972	13	11	2L	6.54641	60.2411	2.15507	3.89811	16.7592	128.271	1.02128	77.2737	2.5429	3.42544	2.17973	129.909
CG16979	14	5.1	3L	9.57046	30.0291	1.81084	3.39956	8.51845	80.6249	10.259	84.7852	12.3951	11.6584	9.72531	64.5996
CG16986	20	5.5	3L	7.9963	16.0313	22.0412	37.74	15.2401	59.3787	35.4193	11.9059	60.4363	37.3207	14.923	6.02797
CG17002	24	13	2R	7.49142	3.7824	2.05464	4.49251	13.199	7.86092	15.4637	9.12878	33.8142	38.7824	36.109	10.6445
CG17005	25	12	U	0.035938	10.9711	0.104002	0.168558	0	46.8143	4.81697	59.3303	3.0497	4.60211	2.9732	76.432
CG17018	25	15	2L	5.03342	0.150519	0.0407934	0.0294864	15.3718	0.111816	18.885	2.47435	1.01446	1.10872	56.1839	6.06115
CG17019	20	10	2R	16.2825	5.41039	6.07741	6.63982	24.9027	2.7754	3.7942	9.73921	2.76838	2.47484	7.33651	20.3799
CG1702	21	9.8	X	9.99556	8.75821	0.739961	1.35564	8.46904	0.326247	83.1242	35.9928	49.1952	43.9669	102.034	5.47736
CG17027	14	4.3	3L	1.59584	5.42739	3.16667	7.92629	0.0732258	2.75997	4.46645	1.13011	13.4268	13.1863	5.46757	0.392193
CG17029	12	4.4	3L	7.98652	19.8625	12.09	20.5608	2.4636	25.1209	84.5275	34.1673	53.8868	84.3564	124.305	5.32513
CG1703	16	7.8	X	41.9582	11.9372	16.366	17.8721	71.5754	38.3244	12.9652	22.6724	26.935	18.4705	34.1192	40.4023
CG17036	11	6.3	2L	4.36228	3.74754	0.0871449	0.459475	4.8204	3.11478	10.7873	4.46013	2.99977	1.98141	19.3741	0.452393
CG17065	14	6.1	X	5.92481	13.1056	8.20664	10.6469	4.10711	24.61	18.0192	7.16829	23.3862	31.8081	32.4261	2.17661
CG17068	15	7.1	X	10.9347	2.822	0.897361	1.53184	7.60117	0.408038	14.544	7.98369	26.5255	25.1675	12.8415	5.86976
CG17083	24	13	3R	0.0176424	40.3605	0	0.0153905	0	79.7203	0	503.687	0	8.25982	0.147449	641.536
CG17111	16	8.6	3R	1.94574	7.5827	7.6587	10.3221	0.115738	2.17471	5.54876	3.18322	23.4726	19.8701	6.24029	0.597708
CG17118	16	9.5	2L	0.359906	32.698	0.366451	1.19218	1.67619	109.79	0.140491	312.547	0	6.06296	0.716506	465.012
CG17119	31	15	3R	3.80673	3.96119	0.737062	1.14589	5.17901	10.8815	23.4885	8.10308	13.9877	11.1714	28.2201	1.89878
CG17121	22	14	3R	1.1082	5.95639	2.14861	2.31887	0.460306	3.54754	34.2074	20.9117	30.2957	40.2944	22.0963	3.92874
CG17122	18	11	3L	0.017634	23.5756	0.394057	0.402519	0.0169812	151.925	0	212.784	0	2.28318	0.05762	231.261
CG17127	17	9.2	2L	0.599742	2.27545	1.18887	0.679508	0.382811	0	117.188	49.4493	13.2704	45.3409	102.894	9.2434
CG17147	20	5.4	3L	0.0792023	0.210422	0	0.00530808	0	0	0	2.78361	0	0.257521	0	0.661717
CG17150	19	6.1	X	0.00299542	2.87042	0.00159001	0.0056244	0	7.03392	1.71894	0.397322	4.9023	3.89012	3.30209	0.606966
CG17163	22	12	X	23.0166	2.19381	1.78733	5.37379	25.7364	0.276248	14.5811	13.584	59.9259	57.0621	11.7858	33.4215
CG17168	25	13	X	21.457	5.37177	16.3258	15.4273	39.5622	3.25166	6.15201	14.2112	7.58108	8.84035	14.8776	23.9235
CG1718	21	13	3L	3.01119	2.99101	2.59103	4.38611	6.10282	0.868262	20.8768	16.6564	15.8629	14.1481	72.5874	2.92357
CG17180	18	5.6	3L	2.75205	5.58079	8.40032	9.97509	3.05928	13.7454	10.2528	4.2225	13.0734	9.03085	6.46962	1.83261
CG17181	23	7.7	3L	0.234894	1.47377	2.49293	3.66091	0.0211774	0.570932	0.309314	2.53439	0.284595	0.170452	0	3.63603
CG17184	24	13	3R	10.8456	8.52451	3.83533	7.5574	19.9972	8.54293	9.47453	11.4772	13.48	14.1814	15.3388	14.5048
CG17187	8.2	5.5	3R	5.38696	2.00224	2.35724	4.27771	12.2038	2.8389	6.26508	3.7892	4.02314	3.26416	8.91042	2.11631
CG17209	16	9.4	X	11.2362	7.46773	0.441841	0.810277	6.80538	0.885741	1.30135	0.671101	0.258621	0.710846	2.90744	1.05522
CG17221	20	12	2L	6.68529	7.3951	2.6097	4.25156	5.25654	8.71059	26.2081	19.0646	31.2664	29.1923	15.0027	7.70803
CG17224	15	12	2L	8.07578	13.6615	11.7223	15.4352	1.224	18.9454	194.912	31.2211	32.2805	29.9774	69.6292	19.4081
CG17230	11	7.8	3R	1.23915	6.43475	0.415764	0.524616	0.783624	17.4945	1.29055	70.8484	0.303823	1.92455	3.68306	159.669
CG17233	17	5.3	3L	8.40575	3.03411	5.54922	7.64611	17.2917	1.13397	2.69801	1.56232	12.8623	6.6754	6.02819	4.01091
CG1724	8.6	4.8	X	0	10.2008	0	0	0	42.0549	0	202.203	0	3.042	0	185.142
CG17249	23	6.5	3L	5.33083	2.91566	5.51055	8.61582	26.668	12.5371	7.40609	11.7351	7.74255	6.48235	9.51459	12.7338
CG17258	16	11	2L	0.114101	4.39213	0.0261845	0.0849705	0.0350058	25.5286	1.39068	25.4499	1.96772	2.17416	1.55444	29.5992
CG17259	23	16	2L	59.3636	22.1339	22.8674	18.6795	78.142	37.4396	79.0558	99.3533	26.9718	35.0551	89.1647	86.8312
CG17260	28	17	2L	6.1405	11.7976	2.25491	3.75344	11.589	117.21	155.632	113.78	71.6904	79.9778	73.3207	87.527
CG17265	26	16	2L	0.275033	0.237149	0.32407	0.431935	0.266273	0.426335	46.3203	12.4411	54.8272	54.0416	21.0798	2.07671
CG17270	14	9	3R	1.08375	0.779805	3.37506	5.30437	8.92499	0.0217822	1.66955	1.35097	6.96068	7.95814	0	0.463448
CG17271	14	9.4	3R	19.856	16.2671	18.1008	16.4865	19.5325	6.9939	25.6257	25.6195	25.8705	20.8161	48.6891	45.0489
CG17272	5.5	2.4	3R	186.43	99.0243	0.664587	2.28785	4.82942	1.16592	1763.75	490.401	457.963	556.454	2117.03	235.442
CG17273	11	8.5	3R	33.4072	22.8741	15.5543	13.4207	38.307	11.8877	317.249	110.565	93.1397	118.164	127.13	6.36696
CG17292	24	11	2L	7.58951	10.7132	7.73004	11.2039	26.2996	7.50351	30.3221	14.4464	40.131	42.2416	31.6168	1.77137
CG17294	22	13	2L	3.13348	2.84657	3.45707	4.91928	5.75091	2.36445	17.7385	19.8575	14.0972	14.1836	18.156	15.8648
CG1732	25	14	4	0.626006	2.08842	3.2961	10.004	0.0418183	0.00761472	12.3909	6.27721	61.5477	52.8122	0.280578	0.082673
CG17321	29	18	2L	0.123201	0.600848	7.68173	9.91599	0.00497828	0.0144633	2.27149	1.01861	22.6317	17.4786	0	0
CG17328	18	11	2L	4.37272	1.20988	1.34688	1.65564	12.0663	2.71597	4.04378	9.62583	9.28261	8.76342	9.95088	34.4879
CG17337	21	12	2R	41.4977	15.8327	11.4034	14.4965	62.2346	8.67328	75.374	151.037	52.1834	60.0472	121.233	158.915
CG17341	18	12	2L	0.0152103	0.0794328	0.36825	0.610074	0.000631999	0.00237221	25.8141	0.313092	2.30679	1.26055	0.321909	0
CG17349	24	10	2L	0	30.5783	0	0	0	62.3614	0	199.919	0	4.22194	0	196.278
CG17350	15	8.1	2L	0.370756	2.70996	0.380142	0.83375	0	7.15224	3.88974	2.14601	17.6171	13.937	2.18063	0.111004
CG17352	16	6.2	3L	2.38167	10.4078	35.3879	46.6997	0.548192	0.592851	17.5696	3.71697	65.8344	72.7169	0.121894	0.034
CG17360	19	9.4	3R	5.47626	7.56692	10.7182	15.7482	13.9228	10.3451	13.8636	10.8466	10.9058	8.41925	9.71803	13.0198
CG1737	29	16	X	28.5134	5.33761	4.49901	5.30885	38.4785	0.919883	6.47591	3.98294	16.6163	11.4298	21.0278	4.61811
CG17370	26	17	3R	6.44495	1.76128	2.58897	4.70581	9.68218	1.13293	26.3818	14.1057	29.6314	30.7922	20.9899	5.91996
CG17374	24	19	3L	5.31772	6.3455	0.0154589	0.191406	0.282729	0.127672	48.3491	28.7624	0.057188	0.053557	91.7231	0.706984
CG1738	18	10	X	9.30345	2.13458	1.90379	3.5674	23.0801	9.02646	26.3898	19.1588	12.8256	8.52942	37.6526	23.3164
CG17385	24	13	2R	25.4985	14.0187	20.8318	24.4808	51.1493	44.8712	18.5637	8.28549	16.8949	18.1268	24.2634	9.60865
CG17386	17	12	2R	0.134952	0.652474	7.75597	7.12061	0.0392694	0.0319825	2.94077	2.53058	29.2017	23.3566	13.6945	0.661784
CG17450	31	17	X	0.0716136	36.2144	1.42277	2.43359	0.167685	376.283	1.09824	715.846	0.930119	6.04534	0.415387	286.02
CG17454	22	9.6	3L	8.44668	2.96903	21.229	25.9126	50.6636	5.28508	85.4717	316.512	43.6765	40.1499	72.2482	362.843
CG1746	27	13	3R	231.251	172.593	270.583	324.076	319.293	61.0327	6864.37	2424.16	8042.91	7202.71	2966.74	197.17
CG17471	27	16	4	2.70716	2.92429	3.46904	5.24383	6.09191	0.924699	27.5201	32.0471	29.9852	34.8823	37.743	34.6012
CG1749	23	13	X	24.584	8.27397	4.08665	4.60472	33.7969	19.6443	10.5969	19.4808	9.04125	7.40009	14.6274	21.0213
CG17493	22	14	3R	4.4945	1.42008	9.78087	14.6202	23.7666	3.85003	20.1596	12.5482	24.0448	26.7288	27.707	7.59927
CG17494	16	11	2R	12.2584	11.4994	5.86639	7.29987	42.1476	29.8752	28.2897	11.4045	42.8116	42.7257	22.0497	1.79236
CG1750	23	11	3R	5.89648	2.55944	3.09746	3.60149	6.2267	2.87137	10.7034	7.78043	10.9107	14.56	12.0026	7.59127
CG17508	29	17	2R	16.569	14.0283	24.2624	20.3219	22.7696	4.4905	226.244	115.793	542.276	559.054	271.636	68.87
CG17514	29	16	2R	3.16522	0.585561	1.14665	1.90831	8.82155	0.163669	8.33304	12.0283	8.48247	8.6114	18.7343	5.42365
CG17544	14	7.5	2L	5.17129	11.5508	1.56952	3.16281	2.81613	5.43285	20.2243	8.48728	15.0139	22.1346	19.4443	1.65923
CG17556	28	13	U	16.153	13.6993	3.70608	6.74653	17.6887	11.9761	35.6039	106.805	33.7652	32.7164	40.2682	122.399
CG17568	17	11	3R	5.9598	1.66814	3.03996	3.94145	14.9155	2.30874	4.16416	5.81515	6.44158	5.43074	9.51852	8.27033
CG17593	17	12	2L	31.3934	19.238	7.27659	14.0518	46.1292	55.4774	3.63725	220.411	6.13442	10.3154	7.8183	696.772
CG17598	25	12	X	5.39924	2.57449	4.43203	6.51071	8.4274	1.03807	11.1386	88.9639	33.0175	30.2194	21.1781	121.84
CG17600	25	14	X	2.46464	1.26289	0.606361	1.34031	2.33891	0.849805	3.79719	2.54868	9.82683	11.9894	1.89388	1.68511
CG17618	15	11	3R	4.10648	3.58635	21.5646	23.3999	16.2608	3.83148	3.89698	5.93783	8.6145	4.36195	4.3752	3.35302
CG17633	27	18	2L	165.945	246.403	0.0213391	0.0951233	0.0249422	35.785	2233.04	1018.35	1.00741	145.319	3140.23	27.0937
CG17636	18	11	X	0.366551	1.21909	1.0443	2.07302	6.57426	1.08602	0.499959	97.1509	0.317718	2.32766	0.252296	170.909
CG1764	15	8.6	X	3.80946	2.33413	4.33095	7.73	9.64322	4.7106	47.9424	18.43	11.9772	13.9512	20.2905	2.38151
CG17652	24	13	2L	3.68437	1.72959	2.99347	4.01804	8.74014	4.44642	30.4385	13.0007	7.3858	3.58239	20.8178	10.1255
CG17660	25	15	2L	15.6523	12.4687	10.5055	14.1823	37.4235	23.1392	12.3137	49.7326	14.2783	16.03	21.9232	114.208
CG17669	23	14	2R	0.0200901	12.2849	0.0238363	0.0480372	0	80.2416	0.041777	143.113	0.206337	4.18913	0.426408	280.409
CG17672	16	5.5	3L	0.193712	0.331153	0.00268602	0.0146867	0.166324	0.780942	1.15884	4.16854	0.847011	2.62073	1.36234	5.50403
CG17684	19	10	2R	0.0353304	0.0965167	9.06253	0.476043	3.66898	0.0202766	6.65049	2.47082	15.437	20.192	0.162368	0
CG17687	27	15	3L	0.0295282	3.42089	0.178999	0.137663	0	6.63669	1.18766	71.8483	8.29905	6.01625	0.057195	65.8557
CG17717	17	11	X	0.0769524	22.293	0.000630928	0.0980875	0.034642	33.8051	0.221911	593.753	0.414879	14.5446	0.505301	864.733
CG17734	11	6.4	3R	26.9597	15.1963	16.456	25.5713	46.1693	8.61529	126.05	57.0511	207.416	135.371	127.828	34.7918
CG17737	20	6.2	3L	83.196	48.8882	52.3082	69.0387	132.045	124.56	52.6567	91.9294	168.608	99.9113	94.801	264.229
CG17739	9	9.5	2R	3.84752	18.1312	44.0281	63.9699	0.240738	2.15091	14.5124	5.10097	24.0909	29.1955	3.92463	0.575154
CG17746	14	5.6	3L	22.3618	10.6699	3.98	5.21352	36.6617	11.9959	1.09818	81.8139	3.42768	3.88584	6.39745	285.656
CG17752	14	9.3	3R	6.99847	20.3624	0.00588941	0	0.0967601	4.93366	3.85692	3.70486	0.573746	0.657856	36.3128	2.00059
CG17754	10	6.7	X	5.70756	7.63718	5.59677	7.70313	16.8297	21.9234	91.8639	44.0082	56.0322	61.6647	46.0472	10.1181
CG17776	17	6.6	X	37.0995	27.557	17.6735	20.4283	43.976	65.1706	105.483	133.662	19.1624	24.6579	27.6629	33.7194
CG17834	13	9.5	2L	1.31839	0.955305	0.586573	0.577667	2.45675	0.716162	23.0879	16.7066	20.0201	22.7835	69.6979	10.5367
CG17839	12	3.9	3L	0.372227	1.74062	4.66403	6.87559	0.0512619	0.375057	14.6401	4.75707	86.3188	51.3875	17.096	1.21541
CG17840	22	13	2L	4.04807	4.57087	1.63754	1.89285	2.54305	1.7327	3.78074	2.21576	4.20282	2.91255	6.50457	3.01397
CG1785	23	13	X	26.2482	4.91828	16.0857	11.8466	95.7501	21.4919	41.4321	111.742	17.9279	17.4975	59.6619	318.563
CG17883	22	10	2R	2.12175	0.616301	1.11576	1.05238	2.2031	0.318853	37.172	19.3999	12.594	15.3153	15.4759	5.81093
CG1789	21	11	X	16.1858	4.13565	24.2038	30.1085	89.5451	54.1508	8.24211	5.79956	5.61467	4.78074	20.9453	18.4575
CG17896	18	11	X	47.3731	42.1727	23.4956	23.9237	26.0369	17.3845	423.428	102.489	279.206	304.398	325.196	23.43
CG17912	19	12	2L	3.10803	2.78297	9.43132	13.0622	11.4181	2.78565	5.68431	10.5129	14.9523	11.4006	25.4596	24.4926
CG17919	21	13	3R	6.65557	20.9546	4.53937	10.6958	0.0790594	10.432	34.3092	26.05	87.3378	116.524	32.2934	16.2209
CG17928	24	15	2L	2.32808	6.23961	9.17877	17.1009	0.511518	0.470462	18.1133	9.04543	8.2424	8.31444	21.1541	0.881999
CG17931	21	11	3R	21.4831	18.954	32.818	44.9821	119.846	65.8736	136.823	524.288	79.4499	81.2648	88.1988	622.465
CG17985	18	10	2R	44.0648	26.6261	11.844	13.9365	51.4291	40.4136	22.5697	32.378	31.2696	29.096	30.9448	60.7255
CG17996	16	8.7	2L	10.1873	15.4412	17.678	24.7389	24.3592	70.546	39.558	56.3477	21.47	29.195	28.3316	41.7196
CG18003	29	15	2R	4.64355	7.43751	11.8029	10.5559	2.15986	4.94155	4.67006	2.71877	16.7367	13.0437	25.4692	0.221142
CG18005	15	9.1	3R	9.75163	6.94871	13.9801	22.6446	32.5874	33.7473	25.7484	12.9869	27.9607	29.8557	28.1054	15.4336
CG18011	9.7	7	2R	2.93214	1.38523	0.305254	1.3637	5.20422	0.640691	3.5506	2.75169	5.74202	7.33399	5.00669	3.76919
CG18031	17	12	X	2.30981	11.0509	0.192892	0.54483	0.0247492	1.14234	119.873	74.7842	0.109949	0.88968	150.133	4.18294
CG18048	28	15	3R	7.27794	1.24887	0.9781	2.90691	16.1227	3.70779	8.42025	15.4262	8.49892	7.59568	11.2159	14.6346
CG1806	13	8.4	X	0.938275	2.07279	2.96038	4.47991	0.471645	1.06227	17.8606	11.9752	26.9013	32.7599	11.8543	1.90718
CG18065	14	9.2	2R	4.23552	3.06367	5.31032	9.72829	5.48109	0.677981	19.8492	33.0038	9.3728	18.4849	12.0474	16.9756
CG1812	15	12	X	8.40859	4.06045	7.37778	8.8211	19.8786	9.06215	2.40745	2.21124	6.42974	3.55869	4.47717	1.5595
CG18130	18	8.1	X	0.0226254	14.3414	0.0560886	0.141576	0.0188508	71.3284	0.016111	117.345	0.4447	2.32373	0.121321	231.669
CG18135	20	16	3L	19.3452	29.9177	12.5792	20.1909	17.8852	5.19167	153.216	127.601	74.9367	64.256	84.7153	121.215
CG18136	16	13	3L	0.589901	2.8162	1.67898	1.13579	0	0.0544507	22.3124	8.59297	12.7563	12.9968	0.480585	0
CG1815	14	11	3R	7.42167	4.7578	6.23762	7.82583	19.3278	6.27803	2.02392	1.47857	1.14377	1.3899	3.72775	0.872423
CG18213	21	10	3R	4.05918	0.528088	0.182973	0.250706	13.0282	0.806204	0.834217	27.2477	0	0.389508	2.1363	14.6468
CG1824	14	9.8	X	12.7583	12.4252	3.25732	4.67966	5.72938	8.85423	44.7309	29.7856	70.211	63.9942	57.418	12.9954
CG18259	18	9.2	X	13.7932	10.7131	1.82293	1.85109	15.5373	22.1939	5.16323	32.8597	11.7912	9.80358	26.0659	116.536
CG18262	17	7.8	3L	5.75391	3.43463	2.16403	3.67296	8.34419	6.55244	2.92745	156.12	4.37876	7.43748	5.02946	324.398
CG1827	15	10	2R	3.67095	18.2007	2.0402	5.81074	1.60565	67.2774	2.84798	105.84	3.46103	4.41014	2.70378	92.4411
CG18278	14	10	2R	11.2652	21.1996	0.85608	1.8411	10.4231	1.19379	3.26532	3.47668	5.44829	5.77794	4.65224	2.63355
CG18292	15	8.4	X	14.0307	4.15706	2.88225	4.53872	22.0346	2.40432	15.8309	5.16522	27.5104	19.9683	28.153	9.17636
CG18304	27	19	2L	0.608976	5.02465	3.1811	2.98518	0.31267	2.43569	26.1816	49.4432	53.0305	40.828	7.25711	51.9815
CG1832	15	8.8	2L	21.5931	11.1646	6.78877	9.18325	32.597	14.5503	8.76432	13.0642	20.9375	20.1809	23.8385	23.0583
CG18347	18	13	3R	14.5714	5.09196	3.22848	5.62058	18.6319	1.62875	47.0781	46.1582	58.2152	60.7548	44.8675	23.0974
CG18367	12	9.7	2R	0.225206	3.74326	0.00949066	0.0271425	0	8.10742	12.7197	2.47093	1.35914	3.60717	0	0
CG18417	20	13	X	1.11295	2.64497	0	0	0.0830929	0.100808	2.39527	1.68236	0	0	21.1042	0.219863
CG18437	24	13	3R	0.529291	3.9944	11.7172	20.4979	0.0101766	0.0628694	2.47329	1.41885	6.08676	9.69324	0.064837	0.446259
CG18480	17	11	2L	1.93573	2.97993	0.00612608	0.0466898	0.277137	1.78325	3.34624	5.22646	0.800009	2.12593	34.9086	0.942239
CG18493	19	11	2R	15.1937	22.3635	0.00465375	0.108861	0.0262539	21.6709	0.196567	1.08275	1.06263	0.471851	0	0.602591
CG18508	11	6.3	X	10.097	17.4124	14.0182	16.3697	24.198	32.1514	46.9485	304.989	122.018	120.016	153.943	1937.88
CG18516	16	10	3R	0.0654608	0.347057	0.00764971	0.021845	0.0365441	0.0317077	19.7635	5.72358	32.0404	52.9932	2.87491	0.126991
CG18528	14	9.1	3R	4.27977	0.691391	1.02644	1.32041	12.9851	3.45323	6.1578	12.1551	7.14034	5.90152	12.0383	16.2482
CG18547	18	12	3R	6.45456	11.8395	4.52406	10.3797	4.05892	2.30595	7.11939	4.83988	6.71999	12.9995	34.8532	1.11932
CG18549	20	12	3R	4.70118	4.28711	3.837	6.89152	8.17836	3.80237	25.0724	7.93196	47.5869	46.4935	22.9805	0.911816
CG18585	15	6.8	2L	6.36213	9.44866	0.00522027	0.0179037	0	7.19514	67.9904	26.6981	0	1.0896	176.818	7.91365
CG18596	14	7.7	3R	5.85393	3.52979	1.19745	2.26476	13.2604	3.13777	0.4123	2.25664	3.49014	2.05028	9.37003	0
CG18599	16	9.1	X	0.152602	0.211476	0.473661	0.536426	0	0.109926	7.42213	3.20971	24.1218	23.5384	37.0081	4.85714
CG18616	32	8.6	3R	8.38736	4.73361	2.49333	3.13215	10.9675	20.2782	5.46775	27.0502	6.16396	8.76787	10.2584	32.4948
CG18619	22	11	2L	6.34939	10.0532	98.1457	85.4577	23.2342	43.7784	503.623	217.101	184.939	223.475	234.687	53.6045
CG18622	19	10	3R	0.883855	1.15636	2.10053	2.33762	0.567651	0.710689	45.1664	13.546	9.66552	9.64849	12.7487	0.535042
CG18624	15	7.1	X	76.8506	119.775	81.5943	65.9407	77.705	60.6306	1965.15	648.088	1153.46	1109.9	527.271	197.597
CG18635	25	15	2R	0.501687	1.4453	0.0172552	0.0822243	0.00787575	0.350414	20.8216	18.7504	1.82907	8.73483	98.4538	3.28573
CG18643	22	10	3R	3.00684	1.85947	1.43458	2.14444	2.28697	0.305524	21.2136	24.3878	36.2097	22.0583	24.8327	17.3198
CG18675	17	10	3L	0.830072	4.27622	11.1587	14.5851	1.0891	30.829	0	153.743	0.151077	2.3819	0	152.28
CG18766	20	8.4	3R	2.40082	4.24654	6.73419	8.49906	4.34499	4.11451	4.30345	2.46305	11.0627	8.03579	7.82719	1.40962
CG18769	16	5.6	3L	0.752038	0.838109	0.444031	0.805494	2.69372	0.618611	13.486	4.52619	19.1913	13.5675	11.5104	0.697534
CG18789	23	14	2L	6.59867	8.23728	0.678821	2.1437	8.50013	9.40626	4.28385	26.0506	4.37224	3.55082	7.19437	27.7135
CG18809	22	12	X	7.01486	8.07204	16.5934	25.2058	15.4254	10.4141	8.96452	24.0848	21.4209	19.5184	10.2332	31.3841
CG18814	23	5.8	3L	0.136135	0.37478	0.0673067	0.180051	0.121548	0.100573	1.50096	1.33495	2.85005	7.2619	0	0.233181
CG18870	24	14	2R	7.1604	1.82764	0.929189	1.45836	6.67754	1.93991	5.99822	4.65352	16.5117	17.5958	5.25853	2.59582
CG1902	16	9.8	2R	11.9277	5.87226	3.6997	4.74491	3.90374	14.4366	34.3003	116.132	68.0794	48.0039	52.4042	104.135
CG1909	19	11	4	0.45807	2.15997	10.4723	19.6578	0.103675	0.117	4.23432	2.67575	18.6386	25.9504	0.221707	0.093245
CG1910	17	10	3R	23.042	8.20342	11.3597	16.2262	57.3958	5.33526	14.8588	7.85648	43.9015	39.1384	70.6523	11.1141
CG1927	12	4.2	3L	13.6421	18.7762	12.1846	12.881	9.73225	5.8963	46.4965	15.3524	27.6949	27.9509	57.0668	1.25131
CG1941	18	9.7	2R	1.43667	2.37458	0.30543	0.559192	0.224757	0.301129	13.7523	13.7058	8.11327	11.8159	47.8868	3.33891
CG1965	11	8.3	3R	5.8342	3.82856	8.54001	12.5347	9.8533	1.21162	5.36469	6.97672	14.874	19.4658	9.83311	5.81226
CG1970	18	9	4	39.3943	57.2825	57.9493	81.404	39.8524	13.6473	389.987	183.294	308.463	346.114	109.569	17.7086
CG2006	25	15	3R	16.5261	19.434	1.37898	1.34904	3.76309	11.14	28.9081	32.7252	17.9633	21.5257	42.1607	33.9475
CG2010	22	9.6	2L	1.89612	14.8809	4.02065	4.19891	0.0423834	0.218214	7.49584	0.493061	4.372	0	0	1.23386
CG2016	20	11	3R	0.435084	1.75859	9.40884	12.5482	0.0152906	0.262702	14.5379	1.77102	12.7397	17.5117	3.28216	0.215841
CG2017	30	15	3R	5.47768	23.5845	10.6462	11.2978	1.98214	12.6914	56.1609	20.9074	37.4387	41.5786	10.4489	2.13261
CG2022	5.7	4.3	3R	0.555217	2.02498	5.57995	3.71692	4.54526	2.43055	0.743696	2.97365	8.88711	1.31083	0	2.45754
CG2051	22	11	3R	20.5546	12.0022	0.989694	2.86136	31.9593	24.6579	21.053	20.8832	7.18686	6.03409	28.2398	26.2093
CG2061	14	8.6	2R	7.13287	21.2835	4.8714	7.68945	13.4229	39.8726	4.93067	110.335	6.92008	13.4261	4.63229	156.322
CG2091	20	13	3R	10.7565	2.89598	2.44506	4.48375	22.986	4.21217	23.8021	8.63899	26.2535	22.5518	34.523	5.76934
CG2100	13	9.5	3R	12.6752	12.3562	1.95188	3.67939	22.3177	75.7134	17.5702	45.3838	15.562	18.3093	30.0012	77.5904
CG2121	18	11	2R	0.160743	0.63805	0.40126	0.777619	0.00434152	0.0244269	19.9344	16.5703	23.7017	21.7473	5.4732	7.49999
CG2124	22	13	X	3.75045	4.5523	0.939536	1.77242	2.85902	2.19281	4.19564	2.92346	2.58794	3.51032	4.46646	2.95628
CG2144	18	10	2R	6.06335	5.85218	3.20596	5.36929	15.3298	11.854	3.14458	30.5234	6.55502	5.89245	7.72004	36.4857
CG2145	13	7.6	X	9.13365	22.349	108.685	134.827	0.44695	6.30793	38.8248	21.036	166.581	183.708	84.6611	8.92544
CG2150	12	8	3R	0.0475464	0.0342849	0.0997397	0.14912	0.369056	2.68039	3.26782	1.63081	13.46	9.42388	5.67537	0.400843
CG2182	21	8.8	3R	33.9555	10.538	25.4191	34.2996	119.028	29.5055	30.2894	28.3365	31.3957	27.4688	48.6906	26.7164
CG2183	18	11	2R	14.4732	3.06244	2.57039	6.17987	23.2784	2.2729	17.1406	7.55435	8.31951	10.3186	15.8021	2.78073
CG2186	13	9.8	X	7.72314	3.23753	10.4455	16.2953	13.0389	2.20131	4.59355	3.59172	11.5749	9.05954	12.1615	7.34509
CG2200	11	3.6	X	13.1018	8.81144	3.15157	3.37275	7.822	6.04562	26.5773	16.7328	11.9821	10.3776	53.1489	4.55046
CG2201	11	7.2	2L	5.88306	4.5461	5.54884	8.09376	15.3805	2.82959	39.6643	30.708	70.6921	61.3623	83.6615	28.7427
CG2202	19	11	X	11.3759	6.3556	3.05799	8.50406	22.4235	23.0875	1.629	2.72609	3.03614	2.41682	3.20474	3.00654
CG2211	22	5.8	3L	11.8651	8.12143	0.644875	1.65654	7.63956	8.84876	109.127	44.8943	104.706	83.6257	104.524	9.98193
CG2218	21	13	3R	24.7447	11.6914	4.98978	6.41505	34.3987	15.3383	11.6486	50.0709	21.1027	19.2831	25.1898	117.941
CG2224	4.7	6	3R	7.1638	15.5538	7.19413	8.99631	16.6126	56.2746	3.83156	6.43491	7.62	5.98683	5.92713	7.60147
CG2254	19	8.7	X	12.774	40.934	28.3071	71.373	0.241935	8.1654	53.2062	49.9761	79.2978	93.3833	500.808	16.2363
CG2256	19	8.7	X	0.105	0.57941	0.1819	0.154573	0.00247408	0	3.13845	1.09675	3.06632	8.17699	3.18731	1.01408
CG2258	18	11	X	5.42131	3.01719	3.8385	5.67869	7.97212	3.52298	2.66704	5.09901	6.71015	5.54638	2.39677	6.24642
CG2269	15	9.8	2R	0.790116	11.0117	37.3807	64.1048	0.0290779	0.0617977	34.3337	17.1962	106.316	130.398	1.49992	1.9384
CG2277	22	12	3L	9.30238	31.5832	3.33309	4.8749	11.5105	257.178	183.905	199.456	73.8763	76.0252	68.5923	149.196
CG2292	17	9.6	2R	2.69714	4.91307	0.153086	0.634416	3.52515	5.10145	1.31938	49.8003	2.43008	3.42704	2.96811	58.4225
CG2310	17	10	3R	8.46547	2.8752	1.27584	1.25023	11.3023	1.60262	13.726	12.5309	27.0706	45.8021	25.7261	1.11296
CG2469	24	7.4	3L	18.5954	9.0379	6.5178	10.6812	24.4171	9.2409	8.34433	6.62774	7.17643	7.6658	13.5447	5.45699
CG2493	16	11	2L	25.6654	13.2256	46.4713	63.6448	55.3302	14.6365	29.4806	14.408	31.2231	40.8809	63.7572	5.24054
CG2540	14	8.9	3R	6.12274	4.07658	1.91868	2.51667	9.91751	1.85449	20.4909	14.7922	13.8084	13.7025	23.7678	15.3151
CG2543	16	11	X	1.09576	0.910407	0.991395	1.64913	1.39254	2.63753	92.8787	25.516	27.9201	46.8549	46.3785	7.97465
CG2556	20	10	X	2.08184	1.55829	0.213262	0.350418	3.36744	0.753834	26.8683	15.3769	19.7137	19.8672	108.716	5.68419
CG2604	27	16	3R	36.543	62.5644	29.558	40.0573	35.0783	52.8706	85.4889	214.151	41.4913	55.7652	133.45	104.781
CG2608	21	15	2L	13.8875	4.34567	4.8613	9.96428	26.7963	2.95216	17.9093	19.6424	29.3012	21.8663	21.3402	34.507
CG2614	13	7.7	2L	9.56304	1.92788	1.25217	1.93749	13.6993	0.870016	5.74284	5.31529	4.79334	5.44801	9.94237	7.27169
CG2656	6.1	2.4	3R	10.2321	5.23811	0.671521	1.22313	2.5633	2.42368	21.2036	6.2467	9.73635	10.9698	21.0642	7.40423
CG2658	28	15	X	18.4008	16.9633	3.33765	5.94553	18.2778	34.9193	56.5178	127.499	50.0454	58.9164	45.8952	94.9611
CG2663	14	9.9	3R	0.0539471	7.03794	0.00478011	0	0	1.6543	0	2.54829	0.989034	6.18218	0	0
CG2685	12	6.2	X	8.38505	3.62744	10.2297	12.983	32.1072	8.55014	2.33388	3.21966	6.35135	4.62577	11.4057	7.04988
CG2736	18	8.7	2R	7.98819	10.826	38.8449	54.9563	0.222699	17.1013	206.51	41.822	130.719	84.7446	211.455	4.15634
CG2747	32	19	3R	6.19703	3.71162	7.23295	14.9711	8.71783	1.15685	12.7449	15.2149	26.5859	28.542	19.8273	21.4856
CG2765	18	9.6	2R	21.73	58.9799	12.1567	18.2061	22.5494	21.8383	72.0675	126.331	72.3331	89.5191	126.323	215.781
CG2772	16	11	2L	3.7324	6.43142	0.0254716	0.127719	0	0.0209499	39.1009	21.7093	0	0.348171	225.9	8.76389
CG2789	19	11	2L	57.4634	55.4495	22.8535	40.2475	76.2194	79.0053	17.98	5.33629	31.0243	37.2679	57.0003	3.46942
CG2790	22	16	2R	8.28116	5.79343	8.69002	11.6903	23.3014	15.9738	18.3125	68.1869	15.9827	13.9913	16.2122	100.648
CG2794	13	11	2L	8.48326	14.1719	1.67749	1.39179	5.15988	42.4924	3.39769	14.5405	7.41489	5.63343	7.09558	42.8837
CG2807	18	10	X	14.7788	5.69297	5.98334	9.51034	22.3132	7.02081	13.7138	7.59864	19.1128	21.8873	25.3827	7.3896
CG2837	13	9.7	2L	0.110028	0.109433	0.0581707	0.37368	0.0355599	0.00529546	21.2601	6.50326	16.5081	21.4388	10.1128	0.685374
CG2862	15	7.8	2L	62.1694	51.3747	4.85461	7.7339	17.2165	27.3742	226.225	172.575	116.914	164.063	237.335	67.1242
CG2865	13	6.9	X	37.5057	1.90452	2.24887	3.97576	11.3935	6.88442	7.4509	11.3028	58.1592	33.438	18.2219	42.5815
CG2875	25	13	X	5.58618	0.489982	1.52777	2.04512	24.8112	0.386083	15.9457	33.6418	11.4473	10.0473	23.5988	30.0745
CG2893	17	14	X	3.43547	0.856599	3.78911	5.76151	6.31773	0.743437	8.27557	6.27353	31.0884	31.2777	6.49623	2.47354
CG2915	20	10	2R	32.8611	14.158	6.29103	6.7478	46.6093	43.3064	17.0283	14.792	22.8674	28.631	56.8201	6.29466
CG2918	14	8	X	36.5961	31.3812	30.3333	39.3027	72.1663	28.2019	6.09927	10.7929	8.28816	5.47857	20.0523	14.2953
CG2924	13	7.7	X	21.608	3.05802	14.1046	18.5436	122.244	1.62675	16.2882	7.01037	18.6964	14.7329	23.561	8.33735
CG2938	24	13	X	14.9407	3.20725	2.26894	2.40383	19.7248	0.389954	5.08535	2.85455	5.79803	5.58916	7.57252	0.669938
CG2943	15	9.2	3R	29.9873	30.1181	7.52886	12.3985	29.3319	36.7504	12.7426	57.4434	11.2121	12.4046	32.2137	59.7385
CG2950	15	11	2L	9.80964	16.7846	20.1063	27.7118	28.5643	43.1381	60.1781	27.9956	82.3596	71.2107	40.713	8.34186
CG2970	23	14	U	8.83919	20.9655	1.57277	2.09057	4.69233	48.5798	38.4301	185.656	33.2965	34.3395	53.3137	155.542
CG2972	32	18	X	26.116	5.667	5.4273	6.67936	38.251	10.5918	45.4578	41.4671	33.67	31.5666	65.6354	72.2748
CG2982	17	7.4	X	63.7344	6.83901	3.18281	3.07877	86.0036	10.6106	14.736	5.54782	4.21676	6.84669	31.8904	11.2101
CG2990	24	14	X	6.31131	0.156381	0.039605	0.0137402	13.4729	0.330258	1.69057	1.39954	0.487779	0.677458	5.21218	1.34684
CG2993	14	11	3R	3.50443	5.83714	26.0704	40.5832	1.20755	0.26243	1.38466	3.18695	11.0964	8.81342	0.846047	7.32149
CG30001	16	13	2R	1.77347	0.323426	0.259504	0.0660784	3.93023	0.983307	1.29052	2.18705	0.657256	0	4.39193	0.766641
CG30005	17	7.4	2R	4.74347	5.86282	2.65689	2.95696	14.2239	1.16552	87.6075	41.2359	25.1544	36.4579	39.9145	1.05584
CG30008	15	8.5	2R	19.9969	97.7351	0.0412839	0.286172	0.111846	11.7262	839.6	385.538	2.92957	4.79015	1022.48	52.4386
CG30015	23	17	2R	0.648971	5.71202	2.66766	3.42771	0.271898	14.174	19.7584	217.741	48.8709	49.5502	27.1719	372.174
CG30022	15	4.9	2R	8.01019	6.42698	3.53981	5.53416	7.38627	1.60065	38.4411	20.0495	0.323527	3.39953	140.637	3.30532
CG30025	28	17	2R	208.404	150.572	0.0054265	0.26986	0.338895	2.11441	281.577	42.7563	23.965	18.3957	85.7136	4.57283
CG3004	25	12	X	11.5594	2.80054	4.27982	4.44297	23.5935	2.09675	17.8496	9.2474	20.3664	18.6431	30.3378	6.70962
CG30051	19	11	2R	5.33297	7.25109	2.53642	5.20712	15.2565	50.1227	22.0804	18.1604	9.17356	7.00241	8.09668	8.82661
CG30069	24	13	2R	1.59823	3.6543	25.335	29.517	1.50905	0.831108	15.319	10.5627	14.5275	24.7611	17.6815	0.376212
CG3008	30	17	2L	13.9422	12.1749	13.6152	17.6291	34.9458	19.1926	67.3198	46.6641	42.3621	38.4238	56.1384	49.0191
CG30085	24	13	2R	19.3094	0.617646	0.555293	0.742037	70.9282	0.27901	4.29601	10.0501	3.5316	3.23504	17.3314	10.2295
CG30094	16	9	2R	5.20104	9.4907	5.56679	7.05731	10.1722	28.621	15.9945	175.227	9.17758	4.95657	11.0855	23.0913
CG30100	20	11	2R	12.9531	5.52085	1.44765	2.49853	6.21344	2.96478	27.7436	47.8109	58.914	52.5962	51.9633	56.8632
CG30109	5.8	5.8	2R	11.5678	14.4115	2.10737	2.11645	20.4231	49.8943	10.7112	84.4163	7.78051	14.8559	26.5408	83.4492
CG30116	18	8.4	3L	0.363511	0.923224	1.99119	3.63033	0.0252444	0.408187	5.5895	3.69357	12.196	10.3676	2.6217	2.09072
CG30122	19	10	2R	21.6338	10.3014	18.4682	27.9241	49.543	17.8943	17.9466	15.629	29.3082	34.1775	62.6884	24.8419
CG30127	18	13	2R	0.0346843	17.2085	0.454638	0.824556	0.00138976	0.0839008	0.575935	1.37629	7.65118	4.10082	0.410366	4.02005
CG3016	18	10	X	14.0683	22.9118	7.93646	9.67134	26.7414	98.2661	3.9636	39.3642	11.4196	9.95776	10.5532	37.2517
CG30160	14	6.9	2R	23.574	81.2668	0.562714	0.739921	0.306557	10.5325	74.1279	79.7111	13.5806	39.0827	360.067	10.0586
CG30172	19	11	2R	1.1098	3.54817	12.1741	17.5607	0.0264499	0.0592759	60.4809	28.1857	78.2021	94.1916	0	0
CG30185	32	19	2R	25.2575	11.9074	14.9457	25.6797	57.1884	42.1056	27.5498	24.9603	24.0433	27.8529	56.8034	30.6024
CG30197	17	10	2R	10.6394	26.2799	30.1644	72.572	1.06007	7.0872	261.354	155.309	304.642	432.089	355.906	7.87038
CG3021	20	8.6	X	8.48765	6.64874	2.56325	3.04792	12.11	55.2433	36.8073	31.3635	40.9358	40.7779	13.5827	16.983
CG30265	16	10	2R	0.139293	0.0398525	0	0.0141882	0	0	5.33102	0.850511	0.558056	0.754264	1.98283	0.162052
CG30271	25	16	3R	0.0567029	12.6644	0.5703	1.0745	0	47.3657	27.6125	28.459	26.8269	24.1699	36.8325	49.4826
CG30291	19	10	2R	19.1368	15.0038	11.7468	12.9039	29.2474	36.7955	17.9766	9.2346	12.7448	13.9143	16.5728	5.96978
CG3033	19	11	X	18.1304	10.4751	6.57835	8.71971	25.7422	27.8527	9.11852	56.9688	10.4822	12.6813	22.9157	81.9272
CG30338	17	9.7	2R	20.2704	0.710933	0.168341	0.623153	0.571345	2.29844	10.2834	97.5875	5.42119	8.62651	13.168	78.1976
CG30344	31	16	2R	8.92669	12.1321	2.92218	3.64528	5.89112	3.85466	40.102	16.0264	37.1132	43.5853	62.4347	3.2808
CG30377	20	11	2R	2.81517	0.125669	0.0287842	0.0667744	3.16411	0.0212933	1.91311	0.338216	1.19349	0.410538	3.88333	0.213882
CG3038	18	13	X	5.16903	0.333925	0.534662	0.725716	14.9759	0.932184	3.01301	1.08048	5.09189	2.72317	2.16193	1.04337
CG30394	15	9.2	2L	5.51837	2.99217	6.62717	8.04236	10.6552	5.36982	10.7429	5.40815	13.1158	13.1149	14.6266	1.49612
CG3040	21	9.9	X	10.5886	9.84446	11.189	20.3319	40.1288	59.1113	68.5676	61.631	16.5754	24.0099	41.2695	10.3591
CG30427	16	7.8	2R	0.290656	8.53293	1.14488	2.02177	0.00381998	0.739801	3.69266	15.3245	19.7847	28.9397	3.32732	12.7446
CG30429	23	13	2R	0.0281893	9.18685	0	0.0915733	0.020826	83.6878	1.34712	87.1647	2.13013	6.14173	0.849643	216.65
CG30456	5	7	2R	2.33386	3.10066	0.821435	1.31106	0.738454	1.42128	11.6403	5.60882	16.3358	11.0321	34.9419	2.4806
CG30460	19	12	2R	0.562052	8.29094	3.18885	4.65221	0.466097	16.8369	7.85747	27.4896	21.673	15.765	10.1949	80.0857
CG30463	13	7.1	2R	4.3714	3.82371	0.444414	0.78407	1.71937	0.748098	4.30809	2.40835	17.7897	14.5998	10.7919	0.389623
CG30491	23	14	2R	3.0667	9.40075	3.33445	5.52242	6.25703	36.1382	51.0242	35.2469	52.3167	71.958	82.2751	26.5966
CG3061	14	8.9	3R	18.2378	27.6614	30.0328	43.0692	35.8966	75.6443	148.649	297.402	124.506	139.632	112.614	287.786
CG3065	15	13	2R	13.9887	7.94574	8.56905	11.5691	35.572	15.7332	9.86868	14.2225	13.5712	15.9321	18.3003	24.0558
CG3077	19	11	2L	7.33244	3.98214	10.9092	18.3826	32.9934	11.038	22.3883	19.5454	27.119	31.187	18.8447	12.6165
CG3081	12	6.7	X	0.00214847	0.170299	0.0210741	0.020077	0	0.0723697	0.088621	7.84233	0.364226	0.787105	0.124222	17.1461
CG3092	19	6.2	2R	0.00665301	55.5417	0	0	0	229.892	0.14776	150.669	0.100658	1.9383	0.083226	158.821
CG31028	28	17	3R	0.0624007	0.17857	0.0994945	0.147786	0	0.0430281	2.14909	2.17087	6.41453	8.63477	2.781	0.068728
CG31038	18	11	3R	0.717216	2.33739	3.7227	5.28385	0.541691	1.66046	22.3026	14.8543	70.5178	61.1689	13.9408	22.3159
CG31051	18	10	3R	0.246155	1.13051	6.48747	10.7281	0.0237364	0.0551963	2.22121	2.26824	3.09801	6.86797	1.69756	1.15941
CG31064	20	11	3R	1.71194	4.4312	5.33688	7.89939	4.2546	5.51256	10.4419	6.19056	29.1125	29.6813	2.76451	3.21506
CG3107	29	16	2R	12.7344	3.61612	6.01738	9.24254	35.824	2.6766	11.882	104.662	23.2232	22.8605	41.9349	105.804
CG3108	20	13	X	0.00977619	0.0286446	0	0	0.009346	0	0.484226	2.26322	0.900253	1.76487	0	0
CG31087	12	7.7	3R	2.76818	3.26203	0.0144865	0.00530808	0.00582085	0.464732	9.28126	9.65973	2.36878	3.86167	30.3878	2.372
CG31098	21	11	3R	7.65319	4.75085	2.4822	5.32319	10.1478	2.30725	8.43482	9.69298	3.95566	5.36726	25.2883	5.62897
CG31100	11	4.9	3R	0.341696	2.36608	1.80876	3.27562	0.0715809	3.83704	3.48813	1.06535	9.65578	8.31478	8.98999	0.516126
CG31102	21	11	3R	1.43	4.55645	3.37662	2.03879	0.0352839	0.497553	11.5255	7.02883	0.922431	3.05954	28.8806	0.523282
CG31103	18	12	3R	1.97262	4.68942	4.11258	7.20451	0	0.00170322	16.5389	4.85274	23.9507	26.4097	4.16271	0.713375
CG31108	28	14	3R	7.43017	5.69744	3.04905	5.12365	23.4765	12.5349	6.26748	296.586	10.2464	15.3375	4.73548	337.834
CG31109	24	11	3R	7.30597	3.82399	3.40899	5.1785	15.4705	10.2534	96.8622	282.569	33.4829	37.9815	52.7708	134.74
CG31120	30	17	3R	8.98407	5.6719	3.17399	3.72097	15.0519	23.4781	9.32401	49.8078	6.71691	6.46721	9.75107	40.3812
CG31121	22	13	3R	0.447405	0.676612	0.281398	0.49517	0.0865496	0.0908611	3.74264	2.97403	10.7241	14.8074	2.70235	0.229343
CG31122	15	11	3R	6.31283	3.81161	7.14663	9.86818	16.4327	3.5454	3.30762	13.8912	12.6253	10.7173	10.4524	67.4103
CG31125	24	15	3R	0.198335	1.92151	2.06199	3.4851	0.201925	13.194	8.15006	7.24657	10.9311	14.7106	12.621	6.01294
CG31156	10	6.5	3R	3.33271	5.26534	2.03188	3.12672	11.181	1.05834	5.46783	4.71295	2.37857	2.56969	5.22618	4.41128
CG31161	19	4.6	3L	0.235173	42.6232	2.07753	2.4444	0.778302	216.421	0.120651	1.2016	0.216521	0.431723	0.0546	2.86969
CG31183	21	11	3R	0.184438	2.04806	1.06675	1.46478	0.0551834	0.0917337	7.85615	3.42559	13.5556	12.7439	7.56283	0.789136
CG31198	17	12	3R	64.3284	103.14	0.30236	0.379176	0.360465	81.0494	65.1662	79.6713	0.146772	0.44787	827.716	11.4319
CG3121	20	14	2R	0.0102748	22.6981	0.0186284	0.0354326	0.0302105	328.047	0.131105	202.263	0.134619	3.259	1.15609	452.481
CG31211	17	11	3R	8.83884	6.87298	16.7398	25.8066	6.986	10.579	20.9064	22.1087	40.9522	41.2591	17.339	24.5379
CG31221	9.7	6.3	3R	0.0751494	3.65859	4.65965	8.79073	0.00504257	0.00277216	2.27537	0.71509	24.4737	8.41737	0	0
CG31224	16	10	3R	15.3885	8.2323	11.3935	18.6158	47.1542	15.4006	2.51434	3.37288	17.4176	8.61443	12.3684	9.87302
CG31229	15	11	3R	8.15157	9.47422	7.99554	8.69467	13.07	53.7913	18.9374	141.639	13.6417	16.8499	20.0598	89.9165
CG31233	22	15	3R	31.1297	51.0267	0.0132593	0.278855	0.189498	15.8529	42.859	38.7417	0.133336	0.571916	823.777	17.216
CG31235	21	13	3R	0.0190064	0.13431	0.281988	0.723638	0	0.152949	0.968672	1.32567	3.50271	5.4517	0	0.473578
CG31274	23	12	3R	1.68936	0.403812	0.782152	1.49032	15.7053	0.629714	21.0819	16.2257	44.8644	38.9113	142.677	5.64459
CG31301	19	11	3R	21.5526	6.77031	8.63334	8.57628	46.4366	12.226	12.8027	13.4648	15.6689	12.7106	39.1927	14.4984
CG31320	16	11	3R	2.3608	9.12591	0.618249	1.36739	4.39293	22.6927	6.99196	82.9714	6.85992	6.33015	5.44911	80.6901
CG31321	16	10	3R	0.580607	0.95056	1.75821	1.84505	0	0.156071	14.758	6.04886	23.1268	29.5211	7.2811	0.148638
CG31323	19	7.8	3R	1.52157	1.92229	0.422992	0.865563	0.0457178	0.34891	5.5184	7.0269	7.03129	6.06819	4.31598	0.519784
CG31344	20	13	3R	6.03156	3.36056	4.25528	6.67739	5.22331	1.52652	36.2489	9.40031	22.3827	29.3483	19.8041	1.94433
CG31357	22	9.4	3R	16.1599	9.7306	9.04865	14.0878	29.7674	2.95289	100.933	85.2857	25.9674	28.7736	40.9262	18.9051
CG31365	21	9.6	3R	14.608	2.62006	3.11543	3.84267	42.875	4.3043	2.98629	7.50141	5.48174	4.66716	6.71513	22.5125
CG31368	19	11	3R	4.7866	1.45988	0.746398	1.17051	4.08313	0.812167	4.07604	3.93923	4.35961	4.39	12.4061	4.39669
CG31381	27	16	3R	22.3005	5.46738	12.1557	21.3101	11.3688	4.01611	3.63882	1.61549	3.16902	2.94105	6.42158	0.309905
CG31391	28	18	U	0.149743	19.6958	0.00392084	0.0650467	0.0927378	84.6864	0	161.409	0	3.0293	0.084824	221.307
CG31414	14	9.1	3R	0.54572	2.58583	4.25466	9.63294	0.0387677	1.23893	20.6763	5.47485	2.97923	4.99066	10.204	0.480643
CG31436	21	14	3R	1.04742	1.87884	2.59922	4.5629	0.175528	0.016155	26.824	16.0915	2.09564	6.53795	102.751	11.1757
CG31510	31	18	3R	5.50904	2.77663	3.74293	5.55054	20.3451	6.64958	3.9134	16.2511	7.3214	6.07487	4.71814	31.5084
CG31522	18	10	3R	2.56084	5.26426	11.9981	12.7476	11.4235	5.00459	145.102	98.0054	154.437	228.356	131.047	5.55665
CG31523	16	5.3	3R	10.0491	19.053	9.85972	11.928	14.4262	8.06178	110.945	72.7518	21.6065	39.0774	83.0389	1.03831
CG31530	16	9	3R	0.282931	1.09241	0.980388	1.50545	0.0359606	0.326552	1.81908	0.766296	0.546734	0.276231	22.2827	0.996242
CG31547	17	9.5	3R	0.922462	5.827	5.15518	7.59513	0.0826418	1.69303	9.21673	2.80487	3.23086	4.01085	15.9877	0.644614
CG31549	12	7.7	3R	32.2902	22.1916	4.81614	7.43862	22.2685	42.0629	30.5496	11.2169	21.6809	30.1437	43.6345	6.29804
CG3160	22	11	X	7.11846	3.14808	1.5983	4.31498	11.035	1.97484	7.5199	29.7911	13.3523	12.7836	13.424	44.072
CG31619	16	9.8	2L	0.180643	0.88141	2.92046	5.01846	0.0110966	0.323549	0.864176	1.23458	2.57595	2.32418	0.304837	0.773544
CG3163	18	10	2R	6.08345	4.32827	13.8097	16.7313	52.2304	59.3083	39.4259	123.954	22.625	16.5381	21.7492	49.3665
CG31635	28	17	2L	6.29325	5.9505	5.73912	8.11268	16.5316	10.1049	4.24139	23.7084	12.8013	9.02074	9.0259	57.7602
CG31637	13	8.9	2L	0.884125	0.924758	1.92441	3.24041	2.23943	0.280183	1.29054	71.2185	6.68205	6.42199	1.18683	112.195
CG31638	25	7.6	2L	6.31552	3.84495	3.83253	6.40149	4.43219	1.70738	45.0801	32.0093	48.592	39.9428	34.0794	16.5077
CG3164	16	8.9	2L	17.753	27.3864	30.1097	55.459	7.33486	6.11229	153.427	111.163	222.286	240.571	344.266	11.2258
CG31648	20	5.9	3L	13.6233	7.21411	3.79733	6.08569	19.2228	24.873	7.82897	11.8701	14.6778	15.5292	20.2644	25.9056
CG31650	14	7.8	2L	10.2545	10.4635	15.3709	25.3705	36.3824	46.8999	55.2057	43.4456	56.9416	63.9736	17.6038	32.254
CG31663	12	9.7	2L	0.320989	2.75828	1.58554	2.82722	0.00691777	0.760547	36.3033	14.4087	11.2215	11.9923	51.9146	1.40357
CG3168	19	14	X	9.77423	18.321	8.51768	9.99694	1.01214	11.5153	955.474	565.241	104.562	123.716	1962.94	70.7758
CG31683	20	13	2L	15.3525	10.2675	13.7564	13.8254	23.7909	11.7634	113.293	34.3233	52.3396	65.8353	83.414	8.41126
CG31688	9.7	8.1	2L	3.64415	2.10419	8.57516	11.1738	6.80221	2.62666	6.78842	5.41052	14.9489	7.06923	12.2175	15.5022
CG31694	19	9.5	2L	17.6483	36.8839	17.3542	20.2072	55.3973	74.7393	57.4482	137.425	78.2011	69.3442	146.36	125.484
CG31705	22	12	2L	11.9141	21.9322	119.946	123.25	12.4026	15.9815	68.8508	32.74	215.736	229.413	133.234	12.9526
CG31712	14	10	2L	6.71856	10.153	41.0545	54.3367	16.3943	8.73935	9.52766	8.06958	36.5862	27.5989	10.3127	12.7838
CG31715	19	11	2L	9.85657	4.68737	4.26089	8.65271	19.5423	31.4661	91.6684	235.568	67.7273	72.4691	153.49	249.52
CG31729	12	8.8	2L	8.98054	11.4942	6.39748	10.2851	9.24348	12.8376	13.7665	21.3079	26.0493	27.792	19.8602	34.9003
CG31731	25	11	2L	9.80663	8.55445	3.75895	5.93108	16.2583	5.40478	17.0872	29.0596	23.5336	29.4445	20.7165	36.0777
CG31743	15	9.2	2L	2.39871	4.04377	7.72647	7.59528	0.882165	1.95342	12.3021	5.04267	10.3743	12.1938	13.3835	1.39829
CG31751	16	7.9	2L	9.82803	3.56456	6.78893	11.3147	2.0536	3.04492	109.51	81.5056	39.5575	60.2455	156.523	7.78992
CG31777	11	5.1	2L	8.23596	8.39216	4.36555	6.25444	0.1177	0.919827	25.6724	7.75641	18.0361	30.8584	30.0903	1.83316
CG31800	15	8.7	2L	6.06445	7.52848	4.26472	7.10488	9.01973	12.0275	89.922	79.5062	56.1281	55.6959	88.3622	84.6081
CG31803	19	11	2L	0.0986561	17.7674	0	0	0	95.8284	0	184.641	0.22208	4.09799	0	275.495
CG31808	13	9.6	2L	0.801525	4.2189	18.3786	27.7864	0.805024	0.333433	11.3309	22.96	36.7087	26.6956	33.0161	25.7753
CG3184	19	11	X	3.83411	3.06931	1.08648	1.03987	2.08269	0.806105	1.49475	2.34786	0.65664	0.57734	3.71385	1.80863
CG31855	27	15	2L	13.7522	8.54616	7.76558	11.2287	39.4556	36.1886	24.4595	55.3125	8.85916	7.80667	17.4318	34.4565
CG31860	14	6.3	2L	0.0103406	5.33785	0.388671	0.175901	0	8.56645	0	58.7902	0.053125	1.39325	0	139.404
CG31886	8	5.3	2L	2.61165	1.11879	1.63601	1.69901	5.74781	0.373109	1.92395	6.37381	1.16827	1.61725	8.82811	1.09386
CG31908	18	10	2L	17.2049	16.3847	5.19934	6.77705	18.6072	30.4122	5.12933	139.505	34.3107	28.8609	35.6099	519.312
CG31915	18	6.2	2L	4.99995	1.70189	2.94495	3.80731	18.2852	2.91246	8.98065	6.24479	21.9477	21.3465	40.0135	3.40452
CG31917	20	14	2L	21.1218	16.3584	25.7242	32.0153	75.1363	188.627	18.7682	22.7815	42.4098	40.6609	69.6771	54.7837
CG31935	18	12	2L	1.41669	2.24352	1.08635	1.71441	2.65279	3.70643	9.58892	5.69055	7.07499	10.6821	12.4351	1.47451
CG31937	28	16	2L	35.7392	39.7287	18.2657	25.0265	20.3389	17.0865	18.6724	21.749	13.2356	15.3226	33.0521	20.3141
CG31961	15	9.6	2L	9.94846	3.93302	8.50353	15.6082	37.5397	7.33744	137.945	156.265	172.923	164.873	133.496	214.265
CG31974	22	14	2L	9.00176	15.5778	7.34823	8.7296	0.522964	2.87444	14.4913	8.67039	16.5528	15.5049	32.5438	0.858948
CG3198	22	12	X	5.80244	4.07513	19.3381	30.9227	14.4891	1.84814	11.9211	19.695	26.3477	23.4402	23.313	29.7828
CG31997	20	11	4	3.27637	9.74569	48.5714	60.5717	4.04195	11.5286	834.974	642.339	2211.49	2986.52	959.18	122.181
CG31998	16	8.5	4	9.05599	2.48542	11.2616	17.9829	49.9862	20.204	0.294089	1.30046	1.28178	1.17732	0.670604	3.15613
CG31999	24	12	4	2.10067	1.79928	8.60671	13.8297	58.3176	5.10057	10.9	5.13314	12.0503	11.5421	31.7854	1.59645
CG32016	13	6.2	4	3.98281	1.48355	6.58896	5.59812	23.0925	1.70841	6.71004	10.5804	43.7856	29.0297	24.6193	25.5393
CG32032	22	6.4	3L	2.38285	8.30678	20.3585	26.8293	0.151551	0.667937	39.9077	18.195	94.7516	120.44	97.9221	3.71336
CG32037	20	6.2	3L	0.104452	0.203012	0.352114	0.22673	0.0140201	0.00578639	11.3673	0.306535	1.93473	2.58545	1.37875	0
CG32038	19	5.7	3L	14.9809	10.0065	13.6132	21.2539	30.1277	8.24177	133.296	50.7446	175.716	170.61	201.535	97.7347
CG32066	13	4.5	3L	2.02973	1.84275	0.492729	0.960931	3.05734	2.32221	10.726	11.121	30.84	17.3531	35.0259	12.2803
CG32068	18	5.7	3L	25.3738	27.7821	44.3084	38.0968	21.7418	11.1826	70.0912	31.0832	57.2881	77.8982	95.2384	12.4515
CG32069	25	7.1	U	11.7175	7.2423	1.56993	3.26051	4.01528	3.003	53.1273	79.0199	48.4709	75.7591	101.454	93.1131
CG32075	21	7.8	3L	7.69076	1.7405	2.4833	2.3629	13.6696	0.954323	6.19094	105.673	8.10215	8.60639	13.594	209.485
CG32085	9.2	3.4	3L	0.0745719	2.15958	1.91393	3.02305	0.014513	6.1269	0.668348	0.508262	7.34138	2.13373	0.233975	0.24767
CG32100	20	6	3L	5.81037	4.38201	7.06994	10.3072	36.5567	34.2755	1.17724	3.67942	3.23003	0.602373	4.94769	4.19963
CG32103	15	4.7	3L	5.29192	5.59616	3.39446	6.00837	14.5375	6.70615	72.7403	67.2664	111.207	85.4971	137.963	93.5958
CG32104	25	7.4	3L	3.0712	1.05236	0.206656	0.576549	4.17316	0.81695	1.34889	5.99313	1.98108	1.98173	4.41499	6.00871
CG32112	19	10	3L	2.73697	8.41536	10.4827	15.9705	4.85901	14.3667	9.4972	60.9458	9.29655	9.32308	12.6808	88.8771
CG32121	19	5.5	3L	0.474373	4.38702	1.25017	1.94102	0.00589003	6.72194	8.80404	2.53959	15.022	5.47182	0.359936	3.43914
CG32137	20	6.7	3R	0.720042	2.79781	1.6882	1.74645	0.661345	6.58224	25.2034	13.1421	23.1356	29.9535	33.161	3.18237
CG3214	13	8	2L	57.9028	137.644	81.8058	112.365	50.5129	120.499	579.762	255.731	1132.84	1079.48	478.525	78.2157
CG32147	16	5.7	3L	6.19796	2.59936	2.35526	4.36124	14.6134	0.958955	6.02794	4.94736	15.7089	12.6144	23.1401	1.71644
CG32164	22	6.3	3L	34.4798	21.1131	3.50348	5.7115	37.8202	16.0959	66.1676	44.2094	54.2164	62.3301	114.069	26.3708
CG32170	19	6.4	3L	1.75313	9.82893	10.4639	11.4568	0.158711	1.47361	14.8762	6.19579	49.7187	41.9092	19.3495	0.854152
CG32174	15	5.2	3L	8.53546	5.40355	5.68523	5.77234	12.2388	4.56372	26.0229	13.9326	23.7466	21.2643	30.98	6.3908
CG32176	19	5.7	3L	5.19722	26.9089	6.23952	9.1979	33.7927	5.02559	7.51245	4.02804	10.6256	8.35187	12.4642	1.95637
CG32191	11	4.2	3L	2.96384	4.62627	2.31144	3.60729	0.379531	1.2454	1.14851	0.466312	1.20694	1.66201	1.88896	0.138689
CG32225	15	9.2	3L	0.694384	3.84835	7.43435	14.041	0.0486395	0.121082	13.8902	6.52612	49.8478	53.3805	1.42981	0
CG3223	23	13	3R	10.0972	15.8998	1.50862	4.35015	12.7809	45.6017	23.6625	33.6599	22.182	21.9479	28.8386	57.5274
CG32230	13	7.5	3L	12.506	14.7008	3.65944	6.99354	4.79178	3.1249	2567.43	1037.12	360.041	371.781	149.467	15.5686
CG32237	16	8.6	3L	0.00286669	0	0	2.22355	0	0.0101992	2.49723	1.30799	11.6199	14.198	0	1.39975
CG3224	25	15	X	32.029	13.4232	15.5014	17.0241	28.8089	16.2578	55.6551	35.9787	29.7943	38.9693	87.4847	39.8904
CG3225	29	14	2L	2.22442	3.59806	1.03605	1.82227	3.84724	5.25539	2.56191	3.90944	6.07389	4.09626	7.43426	3.67125
CG32250	23	6.8	3L	10.4233	16.3902	3.88483	4.67558	13.6506	41.6909	15.7684	53.4511	24.6293	34.8673	54.2024	50.7936
CG32251	21	8.4	3L	12.1204	0.101358	0.899531	0.600535	81.9031	0.0862716	0.994095	1.86027	0.101753	0	3.41385	2.35838
CG3226	11	4.5	X	63.4087	21.0687	8.28352	9.95698	89.493	32.005	106.452	123.071	34.2069	38.565	94.4731	167.915
CG32262	20	5.4	3L	6.81038	45.3131	3.01959	5.77856	6.55434	82.8601	9.31842	214.272	18.439	14.2154	2.17419	365.489
CG32280	20	11	2R	2.09977	5.22243	3.37677	4.21382	0.271936	1.29993	3.93455	6.81774	0	0	1.34252	3.96263
CG32333	29	7.8	3L	0.157656	0.730243	1.66232	3.18615	0.0121823	0.00776248	1.5445	0.622744	11.2546	9.51539	0.454513	0.159221
CG32344	23	6.2	3L	12.6501	1.77586	4.8378	5.82455	25.3531	3.81711	16.0319	9.83934	12.91	20.469	43.7379	11.4358
CG32354	30	7.6	3L	0.812828	1.4814	1.30882	2.37111	0.115146	0.191169	0.420521	2.05901	2.62994	4.95693	2.50087	2.64972
CG32365	20	8.2	4	1.06294	0.152081	0.38999	0.282834	2.06322	0.0621057	1.26478	0.175178	2.85865	1.22955	1.95568	0.174422
CG32379	21	7.4	3L	0	0.00595135	0.0111842	0	0	0.412272	3.63373	4.71066	0	0	41.6164	1.03877
CG3238	10	6.8	2L	9.91903	0.424805	0.327999	0.30574	26.4075	0.455719	1.04095	1.11915	1.75868	2.57661	3.10373	0.587724
CG32396	25	15	3L	0.00505474	25.7581	0.00512591	0	0	162.282	17.2914	170.183	1.60326	4.87766	43.3032	162.967
CG32406	15	5.2	3L	0.0237536	0.668814	0.583777	1.10667	0.00198829	0.00973332	1.42802	0.096014	3.84104	2.00048	0.37958	0
CG32409	23	7.2	3L	30.7457	5.8158	6.10373	7.2034	50.3718	45.5008	15.7827	5.72929	8.37424	9.94452	22.9449	4.79792
CG32432	16	6.5	3L	0.112933	0.653206	5.95786	10.9993	0.00360214	0.092794	1.65573	0.333564	9.92675	5.17049	0.052374	0.147029
CG32436	25	7.3	3L	0.946702	35.0321	0.00753508	0.0941704	0.0448012	110.717	0.054498	177.251	0.399194	2.52325	0.141567	300.434
CG32444	17	4.9	3L	11.5262	60.4329	67.9955	133.021	0.681936	192.298	0.047382	215.413	0	1.61365	0	161.551
CG32445	17	4.9	3L	0	104.891	0.00650217	0	0	279.245	0	950.884	0.190928	13.8971	0.233985	1977.67
CG32448	14	4.5	3L	84.9913	118.382	0.834118	1.13463	0.663164	1.63661	77.3586	32.2641	87.9331	109.219	83.4455	13.9888
CG3246	8.4	6.3	2L	18.2507	31.2003	65.2173	56.2406	0.379686	3.318	20.385	11.8938	64.104	52.1946	100.143	3.92834
CG32473	20	12	3R	18.2476	11.9278	2.98867	4.19038	35.189	16.5131	13.6611	23.0274	21.7088	22.4447	59.3922	31.3825
CG32483	21	10	3L	6.09388	10.0785	0.054754	0.0658618	0.0527479	0.345972	10.8185	15.5614	0	1.50233	87.0136	2.2255
CG32485	18	6.6	3L	5.70297	11.871	6.45533	12.8565	4.78286	10.4559	21.6339	21.5569	44.2427	42.5716	54.322	21.3713
CG32512	16	6.3	X	6.67875	5.18332	5.09309	9.03263	26.3271	9.58333	15.2617	12.0778	26.7267	26.5513	65.324	4.20722
CG32521	9.8	6.2	X	0.797373	1.70589	8.2615	10.0716	1.00683	1.37771	89.5926	35.0213	113.431	139.551	63.1702	6.19797
CG32528	20	10	X	20.467	15.2388	12.3421	17.2211	40.2547	17.1198	408.927	175.302	263.12	370.597	248.154	41.4648
CG3253	17	8.1	2R	0.118439	1.48628	2.19717	3.87189	0	0.707147	89.1592	44.0829	50.6693	55.7013	40.8222	14.5002
CG32533	15	9	X	3.14182	1.57969	0.683238	1.22731	2.26642	4.27426	2.74495	2.46565	5.02423	5.39188	5.11	1.69279
CG3257	15	8.6	3R	0.402591	2.84232	15.9981	25.7826	0.0229351	0.00223005	3.08401	1.68685	28.0678	27.3209	2.66518	2.04104
CG32576	20	8.8	X	39.0432	67.7934	0.648744	0.637644	1.50389	0.460031	7.47156	22.9779	4.86092	5.09782	6.85663	15.0784
CG32590	19	11	X	3.08269	1.49411	3.43828	3.8	6.20471	0.142508	15.3863	10.763	4.63596	4.8859	4.70383	2.78587
CG32642	15	4.3	X	35.6935	0	0.15549	0	18.115	0	1.39107	0	11.292	3.85804	3.50393	3.53938
CG32645	18	10	X	0.839885	0.222837	0.195755	0.40484	0.33941	0.0623873	1.50372	6.19228	1.44466	1.67753	4.02239	3.92262
CG32668	21	9.8	X	0.0574692	0.276434	0.0154229	0.199838	0	0	1.2733	1.53707	5.43627	4.01405	1.48563	0.948825
CG32676	9.9	8.4	X	4.48276	2.64393	1.67789	2.80412	11.8079	3.8206	2.6609	13.6506	38.8203	14.4311	14.7801	51.5766
CG32683	21	14	X	0.0124394	0.238619	0.380793	0.627086	0.000743126	0.00471519	0.326772	7.32317	1.15889	2.11177	0	16.4584
CG32687	14	8.8	X	7.16744	11.7234	24.8364	29.3699	3.45275	4.32851	29.5034	11.6592	35.9922	45.408	90.3037	3.34482
CG32699	18	12	X	7.87136	2.15151	20.8866	23.4443	21.9873	3.33367	17.6386	194.928	38.4129	37.0749	20.4604	256.162
CG32700	24	17	X	0.248584	0.584022	2.07327	3.90982	0.224907	2.60674	2.446	0.983188	9.92848	9.64929	0	0
CG32702	19	10	X	1.65217	1.64241	0.407952	0.790629	0.590555	0.354349	1.97141	1.48892	0.54123	0.819497	6.90635	0.386961
CG32732	23	15	X	2.90081	1.23585	0.545822	0.584849	5.18757	0.199787	12.126	5.28123	20.0365	23.1124	13.8449	3.88622
CG32767	18	4.7	3L	13.6654	5.27271	5.57477	9.88563	41.6206	6.68858	3.63398	3.43926	21.0395	11.8318	7.45561	5.91398
CG3277	16	10	2L	1.53235	5.93049	0.226146	0.20576	0.0275947	3.09742	5.40629	2.86817	3.00548	4.04247	13.6443	0.547059
CG32791	15	10	X	0.261254	0.250487	0.140443	0.446821	0.113407	0.00232265	1.44433	1.84506	2.09742	3.35296	0	1.51495
CG32803	14	7.8	2L	9.25408	6.59281	1.75228	3.14937	10.2364	9.88543	23.9035	38.0378	17.0594	28.2368	21.1148	27.0142
CG32816	17	12	X	9.23489	8.15431	6.29521	8.58481	14.071	22.5826	1.23802	0.499585	1.9378	1.70308	1.59468	0
CG32846	14	10	3L	0.0691827	14.8955	0	0.00501829	0	49.275	0	54.8132	0	0.435883	0	31.9191
CG32850	18	9.2	4	0.647472	0.600146	8.27368	11.1899	2.97381	2.25217	42.2293	40.1868	33.7411	39.3965	38.3997	41.0412
CG32982	13	8.4	2L	0.109695	0.460237	1.35872	1.81458	0.0231835	0.171484	29.8202	12.2078	60.6963	53.6093	17.2439	0.968582
CG33013	12	9.1	2R	0.0328777	0.0999159	0	0	0	0.0307781	35.0103	13.3167	13.5613	22.2331	45.4545	2.67462
CG33051	19	5.8	3L	6.90846	2.0853	17.9941	18.4248	22.0397	26.6296	8.56866	8.85885	7.19003	9.08046	12.44	8.93458
CG33052	19	5.8	3L	9.20772	2.86825	5.23603	7.74817	36.9614	1.43239	7.10658	4.12841	17.893	14.6022	19.0501	7.14747
CG33056	15	5.5	3L	4.20548	8.32223	4.11771	5.64574	1.99748	0.889003	30.422	11.0368	33.2809	26.8456	12.8421	8.31129
CG33057	13	6.5	3L	1.53733	1.34365	0.514906	0.553965	1.0432	4.28579	4.14374	26.0323	1.99407	3.56362	4.39669	31.7349
CG3308	14	9	3R	11.2267	33.3497	81.8403	124.996	24.2863	7.19249	100.291	44.924	67.1642	85.4817	42.4751	5.13661
CG33080	24	14	X	2.22275	7.16112	1.97528	4.71176	0.209312	0.811192	15.5481	10.3237	10.2423	11.7232	64.347	4.92853
CG3309	25	14	X	10.6684	2.58384	1.34512	2.56182	13.808	3.95328	5.75481	23.7262	6.59806	7.81717	6.54255	23.5196
CG33090	17	7.2	2L	5.18276	10.3262	2.29608	3.02118	9.08509	27.3788	7.81278	5.90708	13.6932	16.0807	11.0539	2.50972
CG33098	14	7.9	3R	0.612766	4.43287	0.885843	1.0414	0	13.5815	12.8092	7.68293	10.6817	8.49339	1.20533	0.557691
CG33116	22	14	2L	9.08303	6.64272	1.3801	3.02106	14.052	129.247	4.73639	1.379	5.03087	1.07396	7.06489	4.16629
CG33123	8.6	7.5	2L	30.8283	5.90325	7.19842	10.481	48.0633	4.70407	5.9191	8.31285	3.01462	3.07993	19.2132	6.96541
CG3313	11	8.3	3R	8.36097	10.1255	1.54236	2.54644	12.3517	60.305	5.81071	52.116	8.09236	8.09587	5.46603	72.0395
CG33138	11	8	2R	33.0559	27.7343	19.1398	27.8287	28.4626	5.39334	155.488	75.2526	226.392	188.429	290.861	11.1969
CG33145	17	4.9	U	9.75022	2.3008	2.8581	4.41673	25.0719	2.12667	2.00244	2.39592	6.61255	3.86191	6.16672	1.48228
CG33156	19	11	X	13.3625	2.09749	1.42861	1.89893	21.3173	2.49635	11.4955	3.44033	63.0224	22.6079	14.3473	2.99872
CG33158	21	7.6	3L	0.54876	0.536097	0.0810503	0.098814	0.382404	0.378676	4.45987	6.54745	2.36622	1.91389	4.44377	6.80016
CG33172	24	17	2L	6.73841	0.308584	0.550062	0.369253	14.5552	0.0406104	6.72502	24.9338	11.8715	9.34001	11.6527	30.9531
CG33178	26	15	X	3.18214	7.72407	4.19052	6.34502	0.0780018	0.00295357	42.4486	134.856	69.4753	77.4526	43.4303	201.546
CG33181	19	9.8	X	3.46416	2.36979	7.15477	12.0986	12.4965	1.22971	55.4918	65.2629	76.3371	93.9883	63.9212	26.2868
CG3321	15	10	3R	111.321	190.579	36.9117	57.3576	47.9115	51.7097	3502.24	1656.63	976.322	1241.57	608.647	135.116
CG33214	25	7.7	3L	12.7407	7.69415	5.6587	6.75467	17.7802	5.23252	17.0618	10.8672	17.3772	19.1599	26.8082	7.46583
CG33229	18	5.3	3L	44.1311	37.442	96.4908	137.368	84.9204	4.54119	249.402	37.8715	305.408	152.728	235.49	13.7336
CG33230	23	6.6	3L	8.02369	5.87979	6.21363	5.39393	12.4425	5.42015	14.008	6.23433	16.8072	13.1991	17.3436	0.444439
CG33232	24	7.4	3L	2.52219	7.08796	2.2082	2.58176	2.30302	10.5867	3.89922	1.10511	5.32621	2.528	3.62263	2.31044
CG33257	7.9	2.5	3L	0	0	0	0	0	0	0.350313	0.460158	0.680961	1.14411	0.549666	0
CG33262	20	12	3L	0	0	0	0	0	0	0	224.428	0.187469	4.99463	0.308531	549.048
CG33275	23	7.3	3L	0.687733	1.08802	1.04619	1.72844	1.83302	1.18045	3.93886	2.97681	20.4266	15.2867	6.70392	1.42365
CG33276	20	6.4	3L	2.19569	0.35887	5.64221	6.07133	11.6846	0.531654	61.2689	15.8919	49.9465	39.7095	45.467	10.5542
CG33288	23	8.1	3L	0.518293	1.38835	0.397649	0.159354	0	0.535412	0.378999	2.84149	1.08326	1.45559	0.158958	2.07957
CG33291	17	5.6	3L	0.011999	0.0767734	0.0293811	0.0537104	0.00155739	0.512975	2.55392	0.792932	3.25986	3.11746	1.23217	0
CG33303	24	14	2L	32.4245	22.1681	10.1896	13.3553	46.1599	24.8418	94.0885	60.9021	53.3204	53.76	148.531	30.1662
CG33331	12	8.4	3R	5.9354	1.07037	0.342874	0.939432	4.76771	1.37761	3.08567	1.53559	1.12197	2.07716	2.19323	2.61269
CG33332	13	8.5	3R	5.33655	0.876498	1.59535	2.56478	15.9672	3.0838	2.31185	1.66774	1.00864	0.829189	3.70569	2.47953
CG3335	12	7.8	3L	11.5138	1.88615	4.41479	5.23432	26.5378	2.54902	5.45202	7.8358	3.96174	3.91765	14.8826	8.2969
CG3338	12	9.2	2L	7.12107	3.52245	2.96711	5.11549	12.4307	4.52631	6.71709	11.5879	7.70556	9.28078	7.34267	7.57833
CG3345	23	14	2L	0.0699131	44.243	2.82615	5.69362	3.00685	156.121	0.157613	397.351	0.194838	6.01659	0.52454	447.261
CG33510	22	16	2L	0.397954	0.392992	0	0	0.010833	0.00298984	6.0699	1.05555	5.15162	6.70368	4.10611	0.268019
CG33511	22	16	2L	0.0505284	0.186831	0	0	0	0.14608	2.7102	1.36911	8.46606	11.8387	10.6734	1.00344
CG33514	18	11	3L	2.61356	7.4472	0.0455517	0.0886959	0.0927793	1.10235	2.17736	6.11924	0	0.146568	41.8244	1.128
CG33521	30	18	4	1.82804	3.59578	7.88235	5.25472	0.257481	0.135965	424.805	201.544	289.399	317.03	104.574	23.8398
CG3353	20	15	3R	10.3732	3.9443	3.06517	4.55507	23.6109	26.0571	19.2134	74.2468	16.91	19.3202	31.5302	76.6428
CG3358	9.7	5.6	2R	7.9547	2.05185	2.40967	3.98113	15.5819	3.53368	10.3541	6.10206	3.42945	3.30201	11.8994	4.16497
CG3363	16	9.5	2R	4.76294	1.37946	2.19491	3.47335	13.0619	2.09121	1.04841	1.35643	2.44191	2.31834	2.40981	2.10085
CG33671	16	9.1	2R	22.3791	10.6719	11.8213	11.623	99.5963	41.1586	21.008	46.9354	24.5382	21.635	30.0757	61.818
CG3376	17	8.7	2R	5.20632	3.48407	5.73958	4.915	8.77008	7.45627	14.1021	5.99359	26.1726	19.821	27.9424	2.37865
CG33774	16	9.9	2R	16.1512	10.4984	0.187285	1.94459	3.59689	2.27108	133.144	86.7072	95.7764	111.056	191.95	102.147
CG33786	18	11	2R	13.6807	5.56101	4.10195	4.15556	16.4561	10.5889	7.64458	15.8238	5.12629	5.08457	24.3293	31.9682
CG33932	19	8.7	X	25.7659	14.4979	35.5088	38.4147	92.8254	35.8239	22.0249	35.3655	12.1547	1.92408	17.0859	0.89923
CG33958	21	11	2R	2.13723	1.74592	0.0618567	0.17007	0	0.0645634	1.40863	1.59314	2.60657	1.99126	0.066721	0.284608
CG33966	22	10	3L	1.45386	3.49348	0.016192	0.10724	0.00634352	0.944573	28.0201	19.9968	0	7.3385	161.959	4.62511
CG33969	20	6.4	3L	9.2049	12.3129	0.823606	1.04647	3.16237	1.86432	2.25063	6.15304	6.94129	4.70285	7.89342	15.7055
CG33970	18	14	3R	0.456583	1.8438	0.766201	1.5474	0.0684986	0.259642	34.9133	23.6232	41.5381	64.5127	26.0766	1.02389
CG33977	19	10	3R	7.3234	3.64045	2.56546	8.05956	12.3672	6.7822	17.6172	23.087	23.8456	26.4929	43.7582	24.5681
CG33978	22	19	4	0.115826	0.316528	7.17982	10.3039	21.4362	1.79626	12.6803	8.33166	42.923	38.046	14.5093	1.78061
CG33986	12	6.3	3L	0.00472676	0.00601949	0	0	0	0	0.547437	0.566952	4.50892	2.92651	0.639522	0
CG33988	13	8.4	2R	0.0533696	0.462842	3.46043	6.27854	0.00828727	0.205293	1.17497	0.373629	13.2481	7.22822	0	0.945577
CG33993	11	3.6	3L	0.0162153	0.095755	0.26581	0.368014	0.000938899	0.0241042	0.559723	1.57088	3.0345	3.22033	0.098216	0.806777
CG3402	22	6	3L	11.6724	2.24181	5.43982	6.16944	33.0002	4.42769	7.97136	2.84165	5.19568	8.414	8.96987	2.00956
CG34026	12	5	X	18.3323	23.547	0.0640505	0	0	5.31909	346.902	101.884	20.5382	212.744	62.9957	1.14029
CG34039	22	6.6	3L	2.32637	3.17916	9.11762	8.3002	13.7841	26.3753	17.5472	4.52349	23.2163	15.6195	23.5958	5.09036
CG3407	20	8.8	2L	6.19369	1.20718	1.45943	2.12472	17.0501	2.02489	2.8535	5.8876	2.70211	3.02533	4.78528	4.91441
CG3408	17	5.2	3L	7.08113	7.00363	1.17527	2.15795	39.8454	47.6328	4.98019	8.71051	9.87874	7.09714	14.1729	10.1526
CG34104	8.2	4.4	X	0.217755	0.0868062	0.709726	1.01403	2.06777	1.30873	3.09434	4.18313	5.3391	6.80012	10.649	4.24638
CG34107	25	14	3R	0.0202544	35.576	0.174586	0.171594	0	217.452	0.751784	622.585	0	22.97	0	1417.59
CG34114	11	7.8	3R	0.0175086	0.211245	0.836448	0.990734	0.00276232	0.00362072	0.919848	2.44447	19.6449	13.2584	0.097483	3.49835
CG34115	17	12	2R	0.0648463	0.717239	0.00934823	0.0351757	0	0.0618596	5.5415	5.00161	35.0196	49.808	43.8277	1.04864
CG34117	18	12	U	21.6372	26.5133	6.0041	8.73146	13.9469	86.2703	257.983	135.925	138.425	207.487	82.0709	3.5914
CG34120	19	9.8	X	1.60289	7.70648	3.79628	7.87006	0.817566	5.65874	24.1008	15.3012	29.744	38.6174	18.2091	1.39924
CG34126	11	8.6	2L	7.73799	4.41002	5.6938	7.57972	9.24203	1.44098	3.75102	4.21588	5.58712	6.61492	6.95474	4.77753
CG34132	17	9.4	2L	35.0982	5.40764	5.23487	9.16567	41.8194	11.7312	48.476	50.5815	6.52598	8.47347	13.8196	17.8687
CG34133	29	14	3R	12.8656	10.2617	4.08427	6.34147	27.7826	19.2621	17.5689	82.0017	29.6202	39.9316	21.307	192.548
CG34141	17	11	2R	0.845106	1.44298	1.61183	1.4391	0.196318	0.352747	8.62581	10.9348	40.6394	38.7583	11.0749	29.0478
CG34149	18	12	3R	2.08012	0.875442	1.62731	1.25697	9.11477	0.869733	5.84302	5.8853	5.26437	4.88335	12.5817	11.2768
CG34172	15	9.1	2L	2.72134	8.7362	0.509745	1.20606	0.0309439	0.375584	1091.52	329.187	452.122	93.643	4.86412	0
CG34183	12	6.1	2L	45.5477	15.0963	0.52779	0.517303	2.59295	0.68909	21.3324	25.0836	8.13747	11.2403	21.0823	38.8671
CG3419	14	11	2R	5.65721	3.35776	4.7426	6.52837	12.7019	8.22602	2.41057	13.7108	2.86532	3.60445	3.25319	21.4321
CG34191	22	12	2R	22.6881	9.20099	14.0754	20.5281	36.1905	8.69435	101.434	70.1787	42.9759	68.2677	110.975	48.3483
CG34213	13	7.5	2R	11.9273	35.244	0.170212	0.766542	2.23176	0.57584	41.6465	12.8435	6.08938	8.28226	10.1971	1.38824
CG34221	5	4.3	2R	0.0302651	0.0800876	0	0.0239281	0.00751077	0.0138885	10.1584	3.48511	3.84805	5.54292	0.895226	0.302074
CG34228	11	7.7	2R	5.86602	5.49057	25.9426	36.3246	19.3459	9.87682	49.1147	52.4333	57.0223	78.8913	88.3504	35.749
CG34282	26	17	3R	0.0873879	0.0222576	0	0	0	0	52.6747	20.7878	19.9739	28.749	50.0209	0
CG3430	59	16	2L	16.1606	0.84004	0.274095	0.649182	37.005	0.562134	40.9103	16.0587	28.8344	25.5763	84.0907	10.9808
CG34325	15	10	X	0.899205	3.87108	2.24818	1.76675	0.686782	8.22473	4.9624	659.461	13.2256	23.8764	8.35449	1029.34
CG3434	23	7.7	3L	7.50721	8.24634	1.19205	1.74559	4.96151	4.46668	2.8752	1.63515	2.96697	1.20366	7.5163	1.70975
CG34347	14	10	3R	0.475748	0.482409	6.41708	7.94878	1.29984	2.29375	0.921815	1.15194	2.20317	1.49224	1.66786	0.822436
CG34348	8.4	5.6	X	5.96179	1.40595	1.76432	2.33984	7.69399	0.417919	10.5456	7.78867	14.8083	18.395	20.1756	3.63608
CG34349	22	11	3R	1.48012	1.84772	2.02862	2.99025	2.06676	0.674205	26.9722	15.7452	13.4493	13.0028	18.454	1.47168
CG34353	7.3	5.9	3R	0.0131555	0.13241	1.04096	1.17011	0.0258284	0.261307	1.20313	1.16096	13.649	6.62476	0.516544	1.46797
CG34355	15	7.8	3R	0.116773	0.534676	1.18976	2.24653	0.0949043	0.689454	0.846519	1.33274	6.79349	6.48068	0.583763	0.83288
CG34357	13	9.6	3R	0.0220561	0.86392	0.745734	1.16815	0.395564	30.5828	1.04518	0.442897	8.19496	6.20757	0	0.200663
CG3436	27	16	2L	20.4534	4.79938	6.6514	10.33	41.5147	5.03561	11.2818	43.9927	19.8706	16.7771	20.1784	79.0613
CG34369	10	6.3	2R	0	0.00764113	0	0	0	0	0.125883	5.29107	0	0.147451	0	5.83103
CG3437	17	6.2	3L	11.6678	3.43525	1.36616	1.10188	12.8875	3.19651	3.59465	57.7017	4.37479	3.59138	7.6887	71.6442
CG34370	16	9.4	2R	0.0242244	0.444744	1.50828	2.03532	0.00458717	0.0277937	1.51963	5.72165	23.8139	12.4023	0.110556	2.20348
CG34376	19	8.7	3R	1.41335	3.18258	7.61383	8.36137	1.29693	4.18161	5.2833	4.1142	26.0677	20.6011	35.1127	5.6651
CG34380	16	12	2L	0.0767189	0.361552	3.56178	5.45218	0.021876	0.073026	1.97935	2.12569	16.3944	12.0415	1.54434	2.2149
CG34382	50	11	3L	0.0223147	0.158	0.00748839	0.0299268	0.00298343	0.283355	1.68547	1.55638	25.1853	12.4945	1.75132	1.11085
CG34393	18	15	2L	0.0220338	0.176899	0.606615	0.869423	0	0.132651	1.86192	33.2337	9.70358	12.5548	0	117.517
CG34394	17	11	2L	5.29019	3.02414	5.85166	6.87029	8.57616	3.10422	19.8115	50.0402	23.8805	24.1565	26.279	40.8504
CG34398	27	19	2L	0.352221	1.83328	3.60072	4.08019	0.0214547	0.233746	10.5899	4.65335	35.9341	29.4085	12.8147	2.89043
CG34401	17	11	X	7.39589	2.9588	2.11348	3.54518	13.685	2.60366	2.31445	18.6075	16.4631	8.85953	7.06186	52.8682
CG34408	25	15	X	5.73138	5.76844	3.70291	5.86873	5.28061	1.14472	6.61626	5.84659	8.72905	9.90479	10.6484	3.51164
CG34409	18	11	3R	0.941789	8.68045	1.37315	2.02699	11.0164	2.33335	3.7228	136.369	9.10148	15.4148	4.17476	286.551
CG34411	8	6.3	X	0.949208	0.734694	0.112952	0.237743	0.00150552	0.0072	9.49616	4.35693	4.43361	2.01265	3.2774	2.04643
CG34417	14	12	X	2.74892	6.08219	21.4849	20.9688	5.42344	1.05604	57.7902	34.6948	129.55	108.042	56.0926	16.8398
CG34422	9.5	8.6	X	6.53868	3.44617	3.23804	4.81714	7.43148	3.36591	4.8742	4.25085	12.4533	7.97676	10.04	12.1024
CG34423	17	12	2R	5.87881	15.1739	22.1441	37.4193	3.9576	18.5679	186.393	218.532	76.9241	78.6533	45.2198	338.091
CG34424	21	9.5	2R	14.5646	12.7433	5.77668	8.62646	3.11952	2.55822	7.05872	4.06583	11.5937	18.0743	22.1869	1.50763
CG34439	19	4.6	3L	21.1034	47.6705	4.46725	8.642	3.70583	34.0329	0.149849	1.32997	0.360194	0.329067	0.221345	2.79046
CG34441	11	7.3	2L	14.4708	7.47616	4.08555	6.32951	27.8908	6.49915	7.08628	10.3029	28.4975	21.9891	13.7038	20.965
CG34445	15	9.5	2R	0.668706	1.92207	0.796923	1.1988	1.36732	2.50047	32.3611	14.427	57.3593	81.9885	19.4549	2.79714
CG3446	12	7.6	X	61.5921	105.824	57.7843	71.046	38.7967	53.2682	726.966	436.224	838.461	965.86	454.642	145.4
CG34461	17	8.1	3L	0.0192642	0.0490333	0.140264	0.353553	0.113882	0.0616038	1.02182	3.18364	40.3858	38.7462	6.24867	4.81712
CG3499	27	13	2R	20.5686	45.5631	10.1239	10.3522	30.156	176.236	36.608	208.178	39.9545	41.1697	56.5425	190.22
CG3500	5.9	5.2	2R	12.0015	15.2495	0.924354	1.64033	4.01261	12.2438	24.544	204.277	19.4891	29.436	26.2618	306.884
CG3501	16	5.8	U	17.1686	16.5155	9.27472	16.2249	35.0765	54.1963	17.436	48.6042	6.20617	9.03582	22.4715	32.0498
CG3517	19	14	3R	0	109.653	0.00304606	0.0305372	0	896.091	0	582.957	0.181124	8.5283	0	695.726
CG3520	12	10	2R	1.53297	1.21122	0.744146	1.07438	7.26926	1.13185	2.30423	1.6702	2.94738	2.84897	4.89029	0.860381
CG3523	16	11	2L	49.2296	64.3466	333.194	259.286	11.6625	10.2314	31.5821	30.3733	41.7688	49.9252	91.3792	48.5131
CG3527	18	7.9	X	15.2606	3.8268	2.58852	2.29522	15.4486	3.75539	31.1351	12.9645	11.5322	14.1011	35.5348	2.85968
CG3529	15	4.4	3L	6.31735	6.32021	5.44101	7.87865	8.05426	5.64593	24.0742	20.4267	54.0794	50.5275	49.3818	5.0452
CG3530	17	9.2	2R	4.05397	4.41236	13.9455	23.8162	9.90029	9.87585	2.25746	26.8585	14.6858	11.2791	4.99554	56.5985
CG3542	27	16	2L	10.9494	2.52834	4.75415	7.22124	35.9811	6.93401	5.21736	7.08211	5.86883	4.94129	17.8984	11.3929
CG3552	23	7.7	3L	7.73169	10.153	1.31522	1.0187	5.29905	16.9436	6.05356	242.978	3.46741	10.6745	14.9578	716.592
CG3556	19	6.1	X	0.530811	3.12621	29.6613	49.455	0.0602249	0.390256	2.75508	4.78804	19.7132	13.0377	0.348342	2.44989
CG3568	14	9	X	2.19042	5.38597	0.421946	0.806971	0.50949	4.36979	23.9405	18.9749	7.67217	14.7946	12.6481	9.46874
CG3570	15	9.5	2R	10.1839	5.28958	0.899992	1.75191	17.1649	5.24222	14.164	5.44394	10.1072	13.5791	17.6279	2.8235
CG3587	19	12	X	10.0564	7.75798	2.32986	2.00882	14.468	45.9342	19.6967	94.7039	9.34346	11.5983	18.6933	86.9685
CG3588	19	12	X	1.10851	0.923637	7.47625	11.2497	0.0943218	0.163402	18.6646	11.8089	46.695	46.3451	14.4862	0.495544
CG3590	24	13	3R	27.3917	5.14851	10.6355	25.2721	40.9763	9.73473	202.951	78.459	241.351	237.481	443.404	28.9428
CG3597	20	10	2L	23.9232	29.1447	45.3387	36.9365	0.256805	2.38114	32.8631	19.3383	21.5372	29.821	78.7876	9.55853
CG3603	14	12	X	5.68253	11.0057	1.08434	4.29671	6.37625	52.5566	73.7711	31.6064	29.1801	40.2864	101.927	3.96379
CG3605	25	17	2L	21.5884	6.80818	16.0857	21.5663	66.3373	18.7063	7.70155	19.2727	9.94545	9.25055	17.5825	22.1458
CG3608	20	12	2R	8.9858	10.3423	0.701252	1.25261	10.1579	3.09307	12.9878	11.9636	15.57	12.4339	13.8582	6.75356
CG3618	25	6.8	3L	8.28781	7.01555	29.4353	41.9224	28.1629	20.7077	7.97799	3.18295	42.3353	43.9273	7.78282	6.07158
CG3621	18	7.9	X	48.0112	104.417	36.8416	65.924	51.1809	139.847	775.123	296.37	1099.95	894.535	315.028	149.877
CG3626	13	9.1	X	8.3486	6.16776	4.68739	5.41806	11.4618	1.52012	52.1678	48.0364	49.5526	51.9904	22.3991	38.1776
CG3630	15	9.2	X	2.56524	7.72493	1.67561	2.62325	2.25853	0.198993	123.41	151.733	465.039	333.307	58.1614	558.525
CG3632	11	4.9	X	7.98264	4.03619	6.0562	6.9613	15.8013	1.47971	5.02449	5.8265	10.8259	11.1712	8.31002	4.0733
CG3634	26	6.2	3L	10.9834	5.53285	8.8949	18.4115	24.5979	14.607	8.30341	9.96825	5.45963	5.06006	12.5338	10.3392
CG3635	27	15	2L	0.244172	0.439462	0.0930385	0.141416	0.0182312	0.0111765	11.879	171.736	22.3103	35.8872	38.6244	321.009
CG3645	21	16	2L	0.965774	6.92619	1.64478	3.1885	1.89335	0.786156	4.31611	2.47307	3.1332	2.96083	6.4156	2.30406
CG3655	18	9.8	X	0.877837	0.294165	67.3747	0.699793	6.8598	0.0333207	6.78533	23.9321	6.5802	7.30729	22.8209	20.2812
CG3680	22	7	3L	21.8864	5.76807	5.20726	8.27121	47.8225	11.0233	5.17667	7.46554	11.6812	9.43658	19.3472	15.0018
CG3683	10	7.9	2R	40.4839	63.7225	7.02398	16.2752	15.284	48.8548	384.848	200.085	436.057	419.491	169.883	27.4401
CG3698	16	4.3	3L	0	15.9438	0	0.0664095	0	107.108	17.8398	37.6356	37.1744	21.2808	58.3719	135.467
CG3702	26	15	2L	40.3096	44.9535	10.2579	16.2212	51.023	135.497	33.8161	218.319	31.1242	36.5133	61.7982	224.134
CG3703	15	11	X	2.47474	2.8483	6.01533	9.09224	6.64099	9.51762	5.37566	4.08408	18.2038	23.7986	1.75981	2.40814
CG3704	14	10	X	20.5474	5.03444	32.8967	6.57689	51.7911	12.2533	29.4064	20.9029	5.56345	5.91918	22.2109	17.2761
CG3706	17	11	X	3.1539	4.02397	1.0789	0.398193	4.99849	3.81422	16.5447	6.19101	0.102674	1.08194	47.3754	0.35201
CG3709	18	10	2L	2.04749	0.927257	0.937149	1.42458	2.17513	3.16256	111.363	76.1645	92.8169	101.428	96.2207	63.7745
CG3714	15	9.6	2L	4.67584	6.49483	6.71349	8.16028	3.03397	0.909177	8.38777	3.94805	27.1592	12.6375	32.8339	0.903997
CG3726	14	6.7	X	1.26594	0.812085	0.564123	0.855581	1.50507	0.199461	6.78012	3.89271	26.3572	20.5283	13.8409	1.88226
CG3732	14	8.7	2R	16.3415	7.84021	18.1016	31.1176	47.4377	39.158	6.86934	10.9086	6.1026	5.81015	6.85242	20.5624
CG3735	26	16	2R	9.31145	3.30323	3.6785	3.37848	29.9587	2.4985	8.49657	7.33722	15.588	14.5565	26.2544	8.54434
CG3744	10	8.2	3R	17.4128	8.0417	7.17482	10.2847	32.4773	14.9658	7.30874	13.2673	14.836	14.8911	8.65114	32.4869
CG3746	9.5	5.3	2R	1.16839	3.95134	0.295104	0.878619	0.17256	0.10641	4.65198	2.75633	5.21263	5.46441	8.10317	2.93773
CG3759	13	7.1	2L	1.14018	1.2677	0.166961	0.806761	0.0722839	0.0377747	1.5016	1.64693	4.14095	2.89046	4.58502	0.198032
CG3760	16	8.8	2R	50.2302	18.437	14.0214	17.7641	104.714	71.0263	94.7875	323.558	83.256	99.7218	145.241	547.09
CG3769	13	12	2L	0.0358623	0.303949	0.426762	0.073078	0	0.212485	3.91048	1.98849	2.2145	4.08811	5.60688	3.02546
CG3773	19	12	3R	6.58643	6.65437	2.0248	2.45866	16.8925	1.98875	1.36498	7.80126	2.43534	1.37591	3.93186	19.7796
CG3775	17	9	X	7.43421	10.0614	15.0168	14.2922	0.0721946	1.58024	3.88367	1.46892	13.8891	27.7449	14.6165	0.808839
CG3776	22	15	2R	20.4054	14.3544	14.434	14.7723	28.6084	50.3373	213.998	115.784	75.4899	72.3543	52.1003	24.2408
CG3790	24	14	2R	0.503143	0.478294	0.40274	1.22299	0.00742642	0	6.48405	3.36033	25.7199	30.2007	0.192138	0.292485
CG3792	11	7.2	2L	25.5222	14.8353	12.0431	23.2015	24.498	17.9356	6.24925	25.5402	6.28552	6.74983	13.1835	28.7127
CG3797	10	7	3L	13.7515	3.51604	3.54821	5.05223	29.6991	1.42539	36.4731	25.5447	42.9597	43.2946	43.6714	26.6987
CG3800	12	8.8	2R	266.288	60.3585	664.103	759.276	2009.37	251.32	27.4883	25.023	49.6497	43.7821	99.0087	53.2148
CG3803	25	14	2R	7.22267	5.17198	2.92572	3.72945	6.28917	11.3735	28.734	51.4442	31.9202	36.4274	49.2326	50.5931
CG3808	25	5.9	3L	11.9119	1.5969	1.62089	1.87695	16.4149	0.399888	17.3189	9.1403	9.23457	8.27692	28.9232	6.57937
CG3812	22	11	X	1.30814	0.674647	6.53974	8.89114	4.31576	0.407168	12.1812	5.75824	47.5212	50.0416	14.8871	2.11796
CG3815	13	9.3	X	12.4483	4.90438	1.86955	3.16524	22.4956	13.7332	3.13403	11.1825	3.39642	3.9754	7.47217	39.398
CG3819	15	8.6	3L	9.04996	15.9355	0.0903512	0.127992	0.0208727	0.161415	62.5439	117.75	3.51949	49.9091	35.3712	117.164
CG3822	21	13	3R	0.162626	0.864562	5.37204	6.35076	0.00540765	0.232214	2.20954	1.0371	3.84665	6.53304	0.252897	0
CG3829	18	9.8	2R	3.5064	5.31663	18.5067	34.9463	0.176411	0.991719	42.8965	13.7949	59.5425	36.7546	96.603	2.19309
CG3835	13	10	X	14.5148	43.9203	20.4027	24.7213	1.66115	9.86639	30.7902	10.4695	16.7303	21.3121	23.5523	1.80604
CG3838	11	7.1	2L	6.08355	2.56601	3.52117	3.89097	13.7989	2.05195	86.1201	19.6272	87.9353	93.4548	71.2428	7.4294
CG3841	13	11	2L	3.99685	5.14575	0	0	0	10.4961	49.5746	11.3487	0.166359	3.81783	59.704	0.284028
CG3847	13	9.5	X	28.8788	8.43896	14.4246	20.1066	59.8645	4.56244	11.2529	8.48289	18.3547	16.1161	22.4954	8.11457
CG3860	19	12	2R	9.71834	8.4695	23.9797	36.8665	33.9454	12.6276	134.095	50.3199	44.4064	47.2964	38.6641	6.24644
CG3880	21	10	2R	0.0522566	0.169702	0.033007	0	0	0.20912	17.4817	21.5047	12.8671	15.4579	9.44353	10.7951
CG3884	13	7.5	2R	8.72249	13.2481	0.0787498	0.0734159	0.642417	3.63602	9.16563	8.9895	2.72896	5.45841	68.8416	4.07395
CG3887	8.2	5.3	2L	39.8942	36.4052	45.2313	94.3785	130.864	408.192	30.7448	54.799	57.7137	39.9365	99.6492	50.2726
CG3894	16	10	2R	0.681997	1.7313	7.78368	7.73674	9.86982	24.8824	7.32335	6.6991	11.2486	12.0118	15.9727	11.6914
CG3902	9.2	7.3	3L	25.6724	17.9066	16.5381	25.2534	13.4532	1.60804	273.444	86.4121	159.373	192.401	280.013	9.92678
CG3918	24	14	X	17.1708	3.36064	12.3614	19.1327	67.0401	17.1867	49.3277	51.8849	7.17195	8.8392	16.2534	10.5889
CG3919	19	6	2R	1.95111	5.41235	0.10956	0.246524	5.48882	6.2801	13.0272	4.46211	12.6163	9.58059	14.0111	7.24713
CG3921	23	11	2L	0.87934	1.05324	0.612198	0.960457	0.714462	0.339335	3.47775	2.56239	5.23031	6.82107	12.1505	0.692109
CG3925	16	9.2	3R	9.50381	14.5386	5.87474	8.80307	12.5099	52.1829	13.8939	86.391	20.0677	20.3015	15.9298	149.945
CG3955	17	11	2R	0.874937	11.4538	10.2951	23.4195	0.0141858	36.194	1.27982	1.29576	3.09863	3.10241	0.244334	1.01584
CG3964	16	9.2	2L	0.92081	61.7959	0.0678204	0.0841493	1.14047	239.873	6.50081	227.353	12.4882	9.93947	8.53922	467.789
CG3982	16	6.4	3L	0.117001	276.718	0.390038	0.560421	0.166719	325.388	2.29807	402.54	2.96184	19.3819	0.781582	2672.44
CG4000	12	6.3	2R	25.6934	93.1252	70.0708	48.4795	0.126803	1.127	350.001	275.391	1009.58	883.093	64.4453	5.45865
CG40002	21	12	3L	41.1191	60.781	14.862	37.3644	18.9793	11.9385	827.088	452.198	896.827	817.674	464.601	226.509
CG40045	20	8.9	3L	6.70005	2.03709	1.6484	3.95317	12.4553	2.00252	191.17	94.2212	44.8787	54.8204	184.651	41.9961
CG40160	22	16	3L	2.41811	1.68147	1.06809	2.5207	4.97353	0.518969	54.1542	24.6585	72.5907	83.9444	124.147	5.64732
CG4019	21	9.3	2R	6.04412	13.3543	15.14	31.0892	0.121791	1.33341	19.9045	12.0086	18.6028	29.9299	69.8566	1.77912
CG4022	22	5.2	3L	6.48144	3.49865	6.68477	7.9465	23.5201	16.2243	2.7257	3.67465	14.0394	10.6029	6.11755	4.39761
CG40228	21	12	3L	4.15407	0.789411	3.80434	7.27689	9.22615	1.23118	291.618	224.406	35.4091	35.4506	54.388	11.7075
CG4036	22	11	2L	3.46571	2.33639	1.48472	3.68496	2.53297	16.4003	31.6075	12.4716	16.3116	12.791	24.0778	7.98444
CG4038	14	7.4	2R	52.8025	5.76694	12.5888	13.4986	64.8413	5.33009	19.8032	22.3294	27.6475	16.4708	112.052	41.2995
CG4041	33	18	X	10.6847	4.19608	1.23744	2.84361	6.58874	2.74593	11.4956	8.52544	11.9003	13.1612	15.593	10.8885
CG4042	20	4.6	3L	9.28858	6.35046	2.21184	6.03834	10.8181	10.0732	10.8611	27.7538	16.515	13.2363	14.0567	45.2917
CG40470	22	17	3L	0.00477745	0.0800796	0.741493	0.738794	0.0278402	0.371778	47.8483	20.4659	85.3982	105.072	0.594374	0.190403
CG40485	15	10	X	2.23019	6.27623	32.3847	25.0949	0.0404609	0.967786	41.7818	30.629	9.22478	18.0347	161.355	9.49888
CG4049	26	14	2R	7.08531	1.86284	5.03248	7.11291	27.5754	1.65996	2.97095	9.02657	10.2398	9.43556	8.01594	14.4192
CG40498	21	11	2R	0.0808887	0.318342	6.84512	8.93113	5.54985	26.6819	5.82189	2.44146	9.53126	8.18765	0	0
CG4050	20	11	2R	11.0522	2.67522	2.91369	3.15853	12.3285	1.90362	5.73472	21.6837	9.58755	12.3945	7.55382	20.7539
CG4065	16	11	2R	10.8665	9.69683	3.88388	4.7137	19.8516	42.6328	18.3466	142.512	33.014	33.8473	27.4553	320.653
CG4069	27	7.8	3L	17.6676	4.45937	2.50498	3.01441	23.7745	7.7693	61.1728	25.4373	31.285	28.7665	41.2129	9.39814
CG4074	22	5.8	3L	4.20462	1.47999	1.2386	3.44628	9.40054	2.93533	6.83325	7.59325	7.2819	6.57437	4.11993	11.7641
CG4089	22	16	3R	2.99244	2.03535	0.625367	1.36963	4.88961	1.76755	4.78486	4.38494	7.3798	7.08972	13.2884	8.02208
CG4091	23	8.7	2R	10.0324	3.34999	6.69909	11.3519	35.5315	2.01775	26.9691	14.719	24.3071	30.7382	21.8021	9.04525
CG4096	16	8.9	X	0.507276	1.96973	1.05347	1.0106	0.000800672	0.0184911	3.08713	1.78643	5.55074	4.5522	2.20012	1.3799
CG4098	22	5.7	3L	6.95912	4.27024	3.03587	5.34699	14.4057	12.3864	8.72676	3.96053	9.81752	6.84891	11.2836	2.83222
CG41099	25	15	3R	4.35762	0.853198	1.64036	2.78931	12.6555	0.522785	12.7991	12.2636	11.5109	12.3058	14.2874	8.60876
CG4119	11	7.6	X	15.0146	4.15574	5.55577	8.82076	32.078	5.5925	7.99289	7.5398	16.4455	11.8703	30.1977	11.5578
CG4133	21	16	2L	0.319656	1.89254	7.40574	11.8471	0.0423826	0.427098	1.65182	0.768861	11.8341	9.06593	0.343565	0
CG4159	21	9.7	3R	7.21796	2.72981	3.16923	4.47762	16.0917	12.4532	5.64693	3.54163	6.00113	5.62673	15.9424	2.42838
CG4164	20	12	2L	23.1166	15.7539	17.0599	22.2488	55.4686	51.8231	21.4384	103.319	23.4767	22.847	60.3445	343.445
CG4169	21	6.2	3L	117.706	292.712	84.2086	94.8745	64.4785	244.592	868.85	410.064	353.099	435.533	180.843	30.0516
CG4199	17	8.4	X	6.20168	6.32717	1.66384	3.75384	11.4606	9.66902	36.3239	66.4385	43.8015	49.298	32.8179	59.6816
CG4203	17	9.2	3R	9.47532	2.45265	2.88293	4.2319	23.3048	1.66146	12.8329	12.0696	12.8548	17.817	22.4999	16.9505
CG4213	17	10	2L	1.29468	8.48478	3.31603	2.38944	0.0399206	9.37832	104.693	34.381	61.4193	55.6931	15.0574	0.974247
CG42231	14	10	2L	10.8931	2.53928	7.71095	13.0061	45.1113	2.09046	2.59863	6.19149	6.1767	2.86871	5.81262	10.0286
CG42237	17	7.2	X	0.198204	0.935433	0.00256379	0.0419579	0.0403587	0.281722	13.7313	5.98827	23.7659	29.9148	7.5762	0.719003
CG42240	17	7.3	X	33.4165	20.3229	64.9595	79.5189	161.768	9.93644	22.3901	14.9713	162.542	74.1833	54.7429	5.08291
CG42249	15	9.6	X	2.12259	3.80371	33.1243	49.4957	0.282761	1.50387	43.8899	33.9925	1.84703	2.39497	161.14	10.2522
CG42251	10	6.6	X	0.566654	1.1415	3.00333	4.65256	0.760134	0.0272614	2.75498	2.06407	24.1918	23.0298	0.272871	0.374595
CG42255	24	9.3	3L	0.316004	0.712267	0.00159273	0.0307449	0.168373	0.441634	1.85367	1.7986	1.47772	1.99976	2.8495	2.20016
CG42268	19	8.5	3L	0.510826	3.18323	6.22136	9.92431	0.0946358	1.82308	5.38908	2.69637	39.1357	20.5674	8.17609	0.633473
CG42269	21	6.4	3L	0.303287	0.713684	0.110989	0.453638	0.138928	0.00678502	4.14052	2.35995	10.6201	11.7004	1.35241	0.417163
CG42271	15	9.4	X	7.68039	5.74165	4.08721	6.48859	11.5898	7.66899	6.87478	12.0601	11.9705	14.8128	12.6231	25.2896
CG42272	22	7	3L	0.969178	1.01582	0.132477	0.159882	0.0134197	0.326687	0.808935	0.743108	3.18565	0	0	2.33653
CG42284	17	11	2R	0.109685	0.326711	0.21671	0.305788	0	0.00446019	1.95291	0.832665	1.05857	2.86071	0	0
CG4230	18	18	2L	5.3756	15.4392	13.376	19.4033	7.85845	22.7003	50.5657	225.713	75.1915	96.4418	51.1993	307.127
CG42304	13	4.1	3L	2.04457	2.84051	1.5272	3.35127	2.75015	5.57527	0.755625	0.641551	10.6943	6.72433	0	4.80432
CG42313	16	9.8	2L	0.016275	0.367502	0.376973	0.605541	0.00229845	0.0441102	2.01923	2.02263	11.9908	14.5382	0.176493	1.28761
CG42319	16	10	2R	1.97729	9.93585	10.5031	7.14616	0.0054292	0.0880671	64.7517	34.5635	53.0869	48.6847	12.4684	0.395493
CG42324	19	6.2	3L	1.33679	0.459006	2.84884	3.34293	0.247535	0.0718185	1.29017	0.808	9.17287	4.83296	9.34055	0.947823
CG42327	5.9	5.2	3R	2.76472	2.15071	3.07245	5.63795	6.50366	0.470715	1.27328	1.03669	1.57479	1.39217	2.035	0
CG42331	27	18	3R	0.030188	0.147342	0.948472	1.35292	0.0764784	0.0163457	0.064606	8.44384	0.437456	0.692945	0.24824	7.70881
CG42336	9.7	7	2R	8.74153	7.52803	10.8394	8.61305	11.2997	20.4773	27.6202	16.1486	9.97189	15.3906	90.9296	1.47229
CG42340	15	8.7	X	0.0194544	0.245461	0.622621	0.752781	0.0591375	1.3921	1.31947	0.430956	6.80941	8.09862	0	0.160658
CG42354	19	6.5	3L	5.4823	5.5792	8.17133	10.2843	10.0494	2.06832	4.13	4.23855	7.89229	6.66955	11.5558	8.54243
CG42358	33	20	3R	14.9902	6.82335	2.69508	3.95898	15.6564	19.8796	35.8612	14.1643	9.51727	12.1503	59.2356	20.4647
CG42376	26	15	U	13.9206	4.46758	3.2828	5.79661	23.051	2.32463	24.0188	36.3962	21.2313	19.1634	23.9363	65.4013
CG4238	15	7.1	2L	2.47774	1.72477	2.88851	3.19339	5.99889	4.51357	2.63941	3.55371	22.3696	17.2532	4.71715	4.68098
CG42382	18	9.3	X	2.96938	1.25177	1.67512	2.18196	4.71455	1.76313	4.53714	3.64165	1.62792	1.90756	3.50639	3.58699
CG42388	19	9.5	X	3.59137	1.09927	2.33794	2.54712	17.3667	1.33915	16.3886	11.7114	22.4572	22.3774	18.368	8.57105
CG42389	18	10	2L	0.637076	1.33131	0.387275	0.619815	0.787216	2.62138	2.53799	1.68485	14.8753	9.40634	4.67387	1.08066
CG4239	11	8.4	X	3.36245	13.104	5.51403	8.49231	2.75776	1.28954	280.275	118.819	356.123	355.559	30.995	2.57788
CG42395	17	10	3R	0.474968	0.680931	0.187225	0.0959178	0.0387053	15.688	13.3065	24.5761	18.7556	15.8359	6.46763	19.8673
CG42399	24	12	2L	0.380499	0.853557	0.780915	1.28478	0.141565	1.13264	2.90298	43.6787	6.41576	8.37784	1.85394	70.8474
CG42402	18	12	3R	0.0130983	0.0638783	0.258407	0.509401	0.011713	0.0132477	1.91948	7.73082	7.02048	6.1658	0.975922	13.1517
CG42450	16	10	X	0.418488	1.62995	4.29561	7.71598	0.42465	0.125484	1.72989	1.1473	44.9982	18.0553	2.34787	0.849412
CG42492	19	10	X	0.383045	2.5309	25.2381	34.5956	0.16816	0.0846801	23.0987	9.73905	71.3347	84.2796	0.682423	0
CG42495	20	6	3L	11.6028	1.44885	0.530191	1.07036	1.33386	0.301305	27.6439	14.8744	20.9669	19.2983	29.6431	21.9248
CG42514	19	6.1	3L	3.08172	3.70434	5.17443	5.79861	8.12582	1.32861	17.7857	5.29351	14.0523	17.3266	35.3785	3.39491
CG42518	15	7.7	2R	13.275	19.4962	13.0136	19.0956	28.6891	73.0022	71.8576	59.7265	36.3011	54.1005	24.3193	23.0571
CG42533	8.3	5.3	2L	1.15329	4.29232	3.58893	4.80344	2.6494	0.622139	1.46703	2.71328	1.381	1.68227	2.62757	4.3932
CG42540	9.6	4.6	3L	0.142633	0.798899	13.9877	21.2707	0.0152944	0.0441097	2.92997	0.658085	8.31212	6.02176	0.180371	0
CG42541	18	10	X	0.0490866	0.313798	1.53298	3.61662	0.00771368	0.0350075	0.499699	10.8518	6.80358	5.23305	0	2.5772
CG42575	18	4.4	3L	11.6793	3.82704	9.31749	19.6241	27.0531	1.03519	12.075	5.55493	30.6742	22.4641	20.2107	2.87932
CG42593	20	12	X	14.924	7.59655	4.70763	6.95526	16.0497	8.61153	4.44392	79.7819	5.88641	8.43194	8.76726	126.82
CG42629	15	7.7	3R	0.0168645	0.153448	0.762245	1.25354	0.00104598	0.0306569	72.7295	226.676	55.497	40.5097	20.7846	151.366
CG42637	22	6	3L	2.03166	2.72632	0.853344	1.3751	5.91521	0.339214	4.59809	1.6114	9.45366	5.85929	12.2439	0.669226
CG4266	14	9.5	2R	11.8144	5.24869	7.47118	10.4058	22.9028	7.87039	7.25333	6.57376	14.4948	12.7135	11.6553	12.1699
CG42663	21	13	2R	0.22686	0.32181	0.264674	0.593421	0.121496	0.230025	6.76373	3.53558	14.6885	9.91842	10.164	6.34712
CG42671	22	4.1	3L	4.33073	6.89356	5.78448	9.91882	6.50053	2.81979	6.40597	4.91625	25.3054	17.4069	13.5926	3.06303
CG42675	17	12	3R	2.45216	18.3456	0.835452	0.704021	0.0187413	85.7466	1.64237	282.019	7.91722	16.3598	3.41669	1112.32
CG42676	22	6.9	3L	3.98265	5.81244	4.2306	4.98567	12.5201	11.483	4.27052	4.16473	18.5022	12.2481	15.2737	14.2732
CG42683	15	11	X	0.0281529	0.662133	0.661237	1.0622	0.00254379	0.00830266	0.885603	1.45311	9.62096	6.71713	3.73585	1.44226
CG42684	30	18	X	2.37047	1.06692	1.05762	1.87027	4.12679	0.773409	39.0853	15.1404	42.0976	41.0557	41.7351	6.51301
CG42700	15	7.7	2R	0.1784	17.6655	0.448743	0.904373	0.000643758	0.0595704	6.34179	1.85232	13.4593	6.3247	5.56852	0.615756
CG42724	14	11	3R	8.22612	6.08689	32.5512	52.4297	24.6121	9.64329	8.37665	7.81779	40.8216	35.3103	11.8778	17.4636
CG42730	27	15	2L	0.0215032	3.43015	0.0120868	0.145876	0	22.7315	0.788936	37.2484	1.57288	1.41342	2.06944	65.0421
CG42732	17	9.1	2L	0.433331	2.99547	1.17775	1.80368	1.19331	12.5131	46.0577	14.9248	30.2946	24.4885	20.5073	4.43539
CG42747	14	5	3L	0.021063	0.0251115	0.0115895	0.0228654	0.00961048	0.0205217	0	0.937306	0	0	0.583626	0
CG42788	15	10	3R	0.669513	1.15109	2.98611	4.56003	2.59543	0.773306	3.32674	2.79232	11.7551	12.4257	6.42631	1.13145
CG42796	26	16	3R	0.00686669	0.0536521	0.0729336	0.090868	0.00103587	0.0739084	0.778808	1.49477	2.25504	2.57262	0.414187	0
CG4281	19	14	X	24.7279	6.32105	5.83273	7.77081	58.1978	7.1929	7.4849	16.2494	5.94157	7.86364	10.2806	18.5452
CG42813	9.3	6.2	3R	26.9956	35.5789	19.369	21.4684	26.7584	53.1452	28.4077	106.063	16.9645	19.0858	40.4679	90.215
CG4288	24	8.8	3R	0.373338	6.07323	2.11775	7.81631	0	26.8301	61.2307	38.7024	38.3626	26.7348	222.834	5.2391
CG4291	14	9.3	2L	4.19582	3.66185	3.81696	5.08995	12.3351	20.8644	3.88643	5.23531	3.26246	2.16222	5.36211	4.96301
CG4297	26	20	2L	1.71299	2.04895	1.41381	2.41094	0.203918	0.353497	0.993295	1.19914	3.29284	1.31544	0.900382	0.415644
CG4300	27	8.3	3L	23.3908	9.46358	12.1962	18.8277	54.5521	9.56151	10.8995	4.90733	25.9998	23.3994	17.7981	3.76502
CG4301	10	10	X	1.05516	2.16794	0.278705	0.298887	0.0157234	0.132372	6.63852	7.24235	0.47091	1.05882	23.6298	5.02078
CG4306	15	4.3	3L	3.04393	7.14368	1.57386	6.30511	0.386372	17.5968	19.7445	32.289	14.9138	16.627	20.6054	74.3079
CG43078	26	8.2	3L	3.90246	23.1216	17.1885	23.3739	0.2539	0.41479	22.2555	11.0304	68.7071	42.8171	27.7218	0.682315
CG43102	14	10	3R	0.447494	1.55758	3.77627	4.65032	0.15624	0.542429	4.2582	4.12774	6.95455	5.62531	4.09044	5.30444
CG43129	4.8	5.3	2L	4.68141	4.71333	0.591064	1.34539	0.125958	0.328287	6.18366	2.42132	7.98989	8.40172	1.01437	0.484022
CG43143	25	15	3R	1.20885	2.30065	2.25143	2.60648	1.80983	2.52788	5.20964	21.4513	9.7107	6.10729	3.25592	49.788
CG43154	19	11	X	5.89671	5.2044	21.8401	30.9109	12.6511	2.60688	23.9339	7.37244	43.8658	20.023	28.0853	4.43994
CG4324	16	6.3	X	0.0556602	0.130066	0.0382904	0.26591	0.00355052	0.00795693	26.9278	19.3701	17.0251	15.3258	9.53521	8.74911
CG4332	15	7.8	X	22.8067	3.20232	4.20851	4.12361	46.913	7.96744	6.53864	13.8484	7.15299	7.97387	18.3797	18.3411
CG43320	19	9.1	3R	3.91087	1.80483	0.576735	1.60153	4.76309	1.91053	0.94259	2.37792	0.838228	1.54009	3.43237	1.17143
CG43326	8	8.4	2R	0.142056	2.0548	0.0334563	0.252619	0.0108472	8.78815	21.4572	8.18103	19.8048	25.2336	7.47337	3.31625
CG43333	23	13	2L	1.56613	0.00993981	0.00588244	0.00953635	0.479671	0.0132633	0.515639	1.29398	0.829458	1.13587	1.24341	1.28662
CG4334	29	17	3R	5.58169	1.97912	1.32078	1.5728	8.30597	1.84434	42.5731	73.0702	16.3124	16.5443	44.9081	75.2672
CG43347	22	25	X	0.13344	2.85629	5.21842	9.52303	0.0141252	4.78766	0.647951	8.10769	7.85297	3.4189	3.53265	19.2685
CG4335	14	9.9	3R	2.97242	4.62672	4.3006	5.65044	0.033036	0.0123271	9.21477	9.01374	9.60683	62.4541	90.8796	4.18855
CG4341	25	15	2L	0.0565154	0.378893	1.38187	1.85817	0.00140396	0.0408705	8.13132	3.73995	36.8743	50.6867	0.598118	0.158124
CG4393	16	7.6	3R	0.367112	1.46234	3.7164	4.29978	0.2132	0.396032	0.620018	0.553876	2.34388	1.5572	1.12443	0.825974
CG4404	14	8.1	X	20.9701	9.44277	6.9201	7.55671	18.5079	2.2411	22.9096	3.8889	28.0792	20.4111	12.422	2.48129
CG4406	23	11	X	17.6562	10.1567	8.04477	8.37898	17.9304	18.618	17.6392	109.767	11.7406	21.9279	24.2669	92.0186
CG4447	23	9.7	3L	14.6401	4.40737	5.94434	5.78425	26.7789	7.20238	34.0095	32.3355	31.8865	14.8289	29.4877	28.1924
CG4452	14	5.2	3L	12.6093	9.13748	14.365	14.6629	43.36	37.4976	12.7641	15.7252	8.93099	9.94994	12.0943	12.857
CG4455	17	10	2L	7.09096	1.39395	1.11637	1.73109	18.8893	0.907394	1.46146	5.74186	26.5801	22.5262	14.5749	1.86737
CG4459	18	9.3	3R	0.28656	0.994714	0.133964	0.205748	0	0	0.676697	1.27405	0	0.45351	3.32401	0
CG4461	12	5	3L	38.3132	170.586	24.6096	18.6608	0.0191333	2.02007	185.266	84.4644	93.1386	126.223	11.6102	0.794465
CG4467	14	8.6	3R	0.186833	1.0168	10.0328	14.979	0.0168395	0.0150042	2.59907	1.29076	12.1615	12.479	0.046295	0.468605
CG4476	14	9.6	2R	30.0528	0.791524	0.133177	0.0739843	22.2835	0.629548	2.29062	1.31194	3.41877	1.58977	0.937356	0.692777
CG4497	17	9.2	2L	7.99831	3.01963	1.24647	2.48245	22.2419	9.71507	0.525254	0.900038	2.91129	0.782353	2.40486	3.72192
CG4500	24	18	2L	0.222264	0.175775	3.02811	2.83375	0	0.00492203	1.2405	0.538171	0.383226	0	0.293086	0
CG4511	21	11	3R	37.8093	24.898	17.955	20.5162	168.342	77.481	37.4889	517.225	19.3191	24.4541	28.9854	424.245
CG4538	21	11	3R	10.8854	41.2236	19.8881	21.4203	19.3975	127.838	62.3089	271.815	65.325	69.8495	78.5578	428.463
CG4542	11	7.4	X	6.87423	4.1962	2.13519	3.27511	7.35515	3.84069	6.27643	4.27142	2.14615	4.99477	6.40267	2.35288
CG4552	18	14	2L	11.2829	22.5385	15.5173	28.9189	24.8076	55.7652	4.26031	70.8425	3.40515	4.52614	7.38631	105.971
CG4553	16	11	3R	6.37066	2.19008	2.59717	3.39911	17.3449	5.60629	4.26942	5.45482	7.80811	9.52373	12.5582	9.40928
CG4557	18	8.5	X	8.36741	9.18391	5.15993	8.32261	12.591	19.2328	6.058	10.4156	10.2089	10.7536	10.0238	16.6202
CG4562	20	12	3R	6.73735	12.37	0.714489	1.4106	1.89441	6.29327	11.019	6.28644	13.3587	11.2068	37.1938	0.640033
CG4572	17	10	3R	41.0971	56.5694	13.3454	23.9695	39.4967	86.9788	65.0979	30.8315	44.3531	48.9564	107.116	41.0175
CG4573	24	6.4	3L	2.49973	1.0452	0.208074	0.369936	3.32738	0.200208	13.0984	5.75245	12.1667	10.814	17.7596	3.34784
CG4585	23	14	2R	26.6079	13.176	4.56854	5.74206	30.5492	9.94069	284.666	149.371	93.1328	125.667	329.35	75.0134
CG4586	18	10	X	12.4397	0.315851	0.0610996	0.0899179	30.5959	0.180463	13.4212	7.78704	4.28414	8.20932	24.1715	1.45097
CG4603	15	8.1	3L	19.3379	30.5	8.238	12.5046	25.5574	66.0609	15.2262	114.417	30.3974	25.5377	22.7051	114.605
CG4610	20	11	2R	12.8193	6.70849	4.4995	5.92531	18.7667	8.85054	11.6892	8.16342	10.439	13.6602	17.2798	7.76906
CG4611	18	8.9	3L	13.5795	16.8125	3.45101	6.17756	13.0013	30.7886	16.5332	42.9433	18.3482	14.9583	26.7447	24.5007
CG4612	20	10	2R	18.0753	5.40105	58.3751	76.9273	115.497	4.09391	62.8454	85.3618	222.51	221.044	82.6941	117.598
CG4613	11	4.4	3L	0.0138702	0.0235127	0	0.0241199	0.013225	0.211213	0	2.74934	0	0	0	3.51668
CG4615	20	10	X	5.7679	3.26395	6.88976	11.8636	18.0032	0.949624	24.8609	57.0113	8.28551	11.0041	6.12497	7.25706
CG4617	19	6.1	X	4.29036	1.82331	2.33987	3.3657	8.18631	0.830123	1.71222	0.306156	3.75246	3.00217	3.72683	0.722632
CG4622	25	15	2R	1.05542	1.19787	0.585815	0.800331	2.5759	1.92075	6.3048	9.71035	12.0433	10.0233	15.0662	13.6726
CG4623	22	6.4	3L	2.64451	5.53233	0.282044	0.342921	0.0588481	4.14997	36.0887	27.7591	12.8628	33.1976	102.486	4.69421
CG4629	15	8.5	2L	0.505833	1.5417	2.46594	2.36823	0.0197864	0.231725	3.87991	2.4741	19.1535	16.4627	7.91207	2.49842
CG4630	20	12	2R	0.763279	2.68129	0.921638	2.08425	0.0370511	0.0835927	8.1552	6.7547	15.0237	17.9611	22.4112	6.62502
CG4645	15	11	X	12.4864	8.27592	5.07064	5.76741	20.2472	6.96533	4.61434	26.6291	11.8858	12.2329	16.4948	37.4819
CG4660	18	9.9	X	0.621639	2.3287	4.6027	6.53961	0.0403842	0.123502	7.63699	160.373	27.8144	41.2867	2.67533	238.518
CG4674	16	10	3R	5.39368	6.88678	0.809084	1.14966	4.33955	0.668121	1.83261	13.0545	9.35421	6.88926	9.57741	51.7736
CG4676	15	8.4	2R	1.31565	3.04275	1.23049	1.18132	1.50157	4.68996	1.91874	34.9445	0.895985	1.29821	1.00454	17.68
CG4679	17	10	2R	15.1048	4.19994	7.35305	9.98614	33.4014	5.93255	14.8546	13.0316	26.6023	23.819	28.1413	15.7632
CG4688	17	10	2R	0.956118	2.14577	6.13924	11.0673	0.536015	0.162293	1.78835	4.77205	1.1281	1.18633	5.95089	10.424
CG4692	14	10	2R	180.087	274.271	51.7445	64.2883	51.5008	93.9708	1938.71	1091.35	1816.93	1843.95	901.232	218.044
CG4705	23	12	2L	7.29329	8.75153	1.063	1.47336	8.77993	16.1981	6.27993	2.82111	7.27363	6.34822	12.5787	1.96272
CG4707	15	9.5	2R	5.90422	9.19163	4.35238	4.02329	20.0067	81.0786	1.21306	2.46795	2.17033	1.90422	2.2842	14.7638
CG4734	17	10	2R	53.2415	30.2541	0.00693291	0.0643213	0	1.31499	403.981	134.393	0.220049	167.445	1077.93	14.6946
CG4743	20	6.1	3L	5.89639	4.8094	1.96514	3.80815	4.10545	4.74555	1.24986	0.683914	10.0331	1.9913	0	0
CG4747	19	11	2L	33.479	8.29838	33.8284	40.1113	168.021	24.4314	8.17883	13.3122	9.30864	6.59539	22.8582	36.4172
CG4749	12	9.2	2L	5.21493	1.90899	2.86947	2.83279	9.56362	2.40663	11.2733	7.82952	12.407	15.3296	17.0437	11.395
CG4751	23	13	2L	5.1604	2.8541	5.05236	9.10841	14.7687	4.35766	0.696876	6.94422	3.04693	3.53701	2.35098	17.6229
CG4752	20	12	2R	6.42277	7.61538	2.5964	4.70344	6.03504	11.6188	37.1194	17.9956	14.397	19.3441	79.9239	4.98238
CG4753	24	6.2	3L	19.6846	14.8327	2.56836	1.76833	12.4199	1.85072	198.665	107.089	76.2598	72.8599	185.434	14.1815
CG4764	12	6.7	2L	19.7606	18.0563	6.38962	8.33203	28.6969	22.3704	19.9101	22.0878	36.736	37.4813	49.9946	39.3157
CG4769	16	4.4	3L	76.9493	163.982	60.9193	72.2315	47.0158	14.1511	1428.55	653.074	2298.78	2019.87	656.048	150.346
CG4781	18	13	2R	4.2996	10.3921	0.0141333	0.0290835	0.0640658	6.07112	41.3516	47.7672	1.67066	8.76006	147.272	3.62562
CG4797	22	13	2R	1.82499	3.40341	2.82194	4.46921	0.185829	0.408611	1.27199	1.1982	0.96695	2.0334	4.05971	0.505812
CG4806	21	12	2R	14.1971	3.20364	21.8479	18.9235	60.9796	15.3224	5.99524	11.3366	3.72295	3.18328	22.8243	26.4555
CG4822	19	11	2L	1.93206	4.60499	3.54285	5.96443	0.181714	0.160851	20.0304	10.7763	19.0118	18.2299	19.687	2.42528
CG4825	15	5.8	3L	16.1793	9.55318	7.48229	29.0914	24.6969	12.8117	14.1675	96.6531	12.246	13.1304	22.7302	111.999
CG4829	13	11	X	0.404617	1.47141	4.89258	8.29176	0.0999959	0.640812	25.6166	12.5919	58.2246	73.7453	23.5218	3.51645
CG4835	24	7.5	3L	0.314349	0.558816	0.0151663	0.253773	0.0303975	0.797802	35.0592	28.2866	4.91776	38.7092	291.075	43.2013
CG4836	21	6.9	U	0.0154836	414.76	0.125348	0.204488	0.00369082	1812.91	0.116545	1096.34	0.562111	14.2184	1.401	2150.03
CG4839	15	12	2L	1.63355	2.84715	0.0753903	0.131007	0.115185	0.254793	2.53734	2.64276	0.806187	3.1707	10.4819	1.6203
CG4847	22	15	2R	11.7357	104.637	60.835	82.0072	0.243698	97.0246	450.732	139.396	346.746	497.868	129.395	4.57597
CG4858	12	5.6	3L	10.2377	9.71409	3.89937	6.70026	4.47482	12.3253	26.9382	26.4906	26.8664	27.9893	49.4751	64.8001
CG4866	25	14	U	8.89835	2.16802	0.700906	1.94481	11.023	7.73504	44.594	34.1912	9.75925	6.90108	21.4384	10.8155
CG4893	13	3.4	3L	1.09215	3.62116	2.4922	3.72133	0.0378977	0.450839	57.9574	18.3299	143.158	120.368	149.716	4.1144
CG4908	26	13	2L	6.17716	2.06776	1.14469	2.34958	6.86447	1.13603	44.4267	33.7886	50.3243	44.6615	35.4974	23.6999
CG4911	18	8.4	3L	17.7214	5.64077	24.5524	27.4989	44.4695	8.78124	8.01603	188.96	14.1909	10.058	7.61753	130.428
CG4914	23	7.8	3L	0.0402488	0.144882	0.98339	1.36531	0.0231032	0.0151875	1.99214	0.256323	0	0	0	0
CG4925	22	6.7	3L	6.88432	3.30024	4.89676	5.76437	18.2703	7.34802	13.847	8.22796	12.6435	14.8916	15.1579	6.0458
CG4933	22	6.7	3L	12.4407	33.4724	0.871293	0.818118	6.12519	1.07096	29.7501	12.9103	102.289	147.187	5.53596	2.37982
CG4935	22	12	2L	3.10439	4.04604	0.341883	0.893489	6.46893	18.7512	5.89267	6.5685	9.10519	13.9152	8.94598	4.44162
CG4942	18	8.4	3L	4.23093	2.35109	0.147944	0.409234	3.05296	1.78361	14.9079	9.55602	8.29459	7.1368	4.07563	5.89031
CG4945	12	11	2R	82.0396	52.8241	1.49866	1.85944	0.0466167	0.285429	8.00966	2.29469	14.1866	11.6594	3.28108	0.329042
CG4950	17	6.5	3L	1.64469	2.59527	9.37318	12.1405	0.116509	0.286703	7.27973	1.93765	48.1063	27.368	15.5079	0.870274
CG4953	16	11	2L	8.98346	2.93563	2.8356	3.02911	16.2074	1.42946	6.03546	16.404	6.63872	6.14101	7.08591	18.0175
CG4957	19	11	2L	5.05681	2.87174	9.62508	8.67361	32.995	8.90534	4.77733	42.741	7.05218	8.29739	12.0732	63.2196
CG4960	22	10	2R	0.276438	10.4054	0.00574571	0	0	17.4122	52.3135	221.299	28.7078	41.2465	42.3582	115.471
CG4972	15	11	2L	21.5258	8.31537	5.90678	10.0363	36.7073	4.9584	15.124	24.8549	33.0531	31.8892	49.1211	60.5587
CG4980	29	18	3R	13.9275	4.11767	3.26324	5.37122	26.6644	12.6146	17.4485	25.2368	10.7929	9.9042	19.4116	36.3043
CG4982	10	4	3L	0	0.0374904	0	0.26702	0	0	69.7714	33.4147	212.668	248.59	0	0
CG4991	17	7.7	X	49.1331	2.46408	2.55749	2.71161	81.8402	0.590511	18.4597	7.26956	5.14711	7.33968	33.759	0
CG4996	7.9	5	3L	8.87378	2.15388	2.83336	5.30382	21.9934	1.16836	14.8044	11.7516	8.54839	9.76029	8.87687	5.68771
CG5002	14	11	2R	2.79511	7.74459	1.09221	2.87742	0.190142	9.54589	2.80596	1.8406	4.32295	9.11814	7.34247	2.29101
CG5003	23	13	3R	14.1474	4.7411	4.07019	5.52934	20.6591	4.83362	3.74407	12.8036	8.20542	8.84483	6.70991	35.9151
CG5004	15	8.5	X	3.26426	0.689073	1.2275	2.22352	6.61359	1.04632	18.6902	5.75391	12.6692	15.4615	14.1411	1.36575
CG5009	16	10	2R	10.433	15.0319	10.3564	15.4649	6.1836	7.44665	47.4618	39.6138	27.4233	38.7759	73.2202	2.55792
CG5010	14	8.2	X	36.9887	50.5245	151.128	142.783	177.9	105.101	678.522	816.416	683.049	818.428	484.58	404.239
CG5013	17	11	3R	4.4013	2.98789	0.679922	1.57982	3.79721	12.7806	27.2633	21.9969	28.0614	22.2706	32.3596	10.7489
CG5022	28	17	2L	0.260338	0.458201	0.762395	1.44931	0.0125085	0.00635214	2.42614	0.737768	2.50869	4.08149	0	1.13577
CG5027	24	6.4	3L	8.28382	4.49697	6.76047	8.36784	8.13727	1.35316	7.79329	40.5209	19.448	19.2764	9.03578	34.9105
CG5028	5.2	4.2	3R	45.8264	97.6512	61.3023	71.8475	41.5908	7.2052	564.051	256.114	829.352	712.228	129.942	29.1284
CG5033	13	8.4	2R	23.5132	3.0482	5.743	6.25918	46.4682	5.00756	9.75691	9.40729	6.38011	4.53679	28.497	14.6663
CG5036	13	8.2	2R	2.01474	2.39265	8.68269	14.5145	11.2665	0.877508	1.73228	1.18365	9.22809	6.14176	5.80243	0.445957
CG5037	21	11	2L	23.9429	31.0394	11.4674	18.1889	29.9526	25.0556	46.7613	117.714	75.6241	74.3764	38.0675	129.829
CG5044	25	16	3R	26.352	24.2608	9.07292	10.5769	23.313	7.9643	178.814	73.8016	64.6954	69.7719	125.226	10.9336
CG5045	25	13	2L	23.9868	83.2543	10.3751	10.7327	17.7438	153.986	33.4712	434.082	29.6693	37.7615	41.9654	470.344
CG5056	18	9.5	U	20.9906	14.7344	5.92831	7.17997	29.7361	65.322	92.444	63.8049	31.9216	30.4112	45.3685	28.0664
CG5068	25	8.6	3L	10.5418	5.57048	5.22224	8.3582	12.6502	6.8055	38.8825	53.3492	43.4491	37.7973	36.0397	93.7798
CG5080	7	4.7	2L	6.80457	16.0237	16.6483	26.2435	0.674642	3.1531	20.2309	11.5433	47.576	55.6704	61.2447	1.88933
CG5087	19	7.8	3L	10.6273	5.33059	4.82255	7.88387	16.8091	4.63652	2.8168	2.8141	8.69436	5.94907	6.44425	2.92207
CG5098	22	14	2R	8.78748	6.02673	7.40901	10.404	28.7443	9.58826	1.04072	12.0488	5.37067	4.43574	3.57877	25.3091
CG5111	19	12	3R	0.00864726	13.836	0.0109613	0.0589927	0.00835348	74.8979	11.7926	98.4524	5.70224	8.26647	7.88088	101.549
CG5114	18	5.6	3L	20.8724	8.47341	8.75309	9.59082	19.8638	20.0423	10.3723	67.4875	10.3104	6.2887	22.5268	79.5889
CG5151	17	6.4	3L	2.03633	1.36502	2.23969	3.29274	7.39365	0.708621	4.47406	2.98044	24.1523	20.3973	22.6719	3.59914
CG5160	14	7	2L	0.169094	0.579025	0.211482	0.140705	0.00157367	0.0356613	6.06011	3.53151	8.85813	11.6827	2.56742	0.671774
CG5168	17	8.6	2L	27.3803	18.3127	8.02235	10.5899	23.1959	30.3224	19.8074	59.7129	20.0187	23.8803	34.9901	61.4115
CG5171	9.2	6.3	2L	1.00508	2.09816	4.82609	3.09659	0.0193125	0.57213	50.1503	34.2859	121.819	135.498	278.885	9.21187
CG5174	22	11	2R	15.6889	12.3157	14.9303	19.7766	23.4822	22.5258	52.1352	217.091	16.8936	19.1492	35.3849	74.1539
CG5177	9.2	6.3	2L	5.03209	29.5096	16.1963	13.783	0.629495	2.9325	628.996	260.635	985.747	982.767	390.47	15.4892
CG5180	11	8.3	3R	9.83808	6.45935	3.2391	4.07915	12.7418	17.0642	3.08793	1.34889	5.04775	4.74375	5.49715	2.52313
CG5188	26	13	2L	4.42999	3.98103	0.740807	2.13192	5.38563	5.06509	32.8607	32.6203	33.4712	33.0458	31.1571	14.4022
CG5189	17	11	2R	6.35565	3.39536	1.13271	1.30171	0.652123	0.890457	24.6399	17.3724	32.8941	35.3803	56.5887	27.0523
CG5190	23	14	2R	9.39892	6.39628	8.45817	13.5195	17.7892	16.0536	4.48905	5.52486	5.97518	6.24762	13.9677	6.08705
CG5191	23	11	3R	3.12957	2.8901	4.03481	3.82758	3.26227	1.31254	32.1361	26.1619	52.956	65.0009	17.7899	9.5971
CG5196	16	9.9	3R	8.16454	4.72155	3.16557	3.83601	9.67703	5.76976	15.255	6.41512	19.4813	19.0665	20.7276	4.38803
CG5199	11	4.6	3L	11.8249	1.45297	1.60508	1.435	31.6975	1.77106	2.57036	0.766958	3.74197	4.30093	2.81876	2.68835
CG5214	22	10	3R	55.6635	137.643	22.3429	31.3773	31.9857	70.7871	492.994	427.026	887.296	736.919	218.906	432.578
CG5246	12	8.8	3R	6.13487	7.22945	0.00405112	0	0	2.12583	19.4091	14.0828	31.4922	101.526	96.8161	2.29714
CG5261	15	9.8	2L	36.8214	97.1314	42.0293	48.8098	26.4574	64.0831	382.683	273.588	499.011	341.874	133.548	270.155
CG5273	14	7.9	X	17.2276	40.5641	141.914	219.828	23.0883	24.0594	87.937	42.7707	173.708	199.804	101.82	9.86593
CG5278	16	6.5	3R	0.290127	4.96322	0.391435	0.262766	0.0887905	0.496217	4.77687	3.98014	9.72718	6.67557	0.198086	0
CG5280	14	4	3L	0.262338	32.4057	0.0118529	0	0.115432	109.79	0.505097	166.312	0.562037	3.05718	1.85156	134.22
CG5282	19	13	3L	0.508284	3.04417	7.36929	18.3915	0.00986937	0	6.4889	2.56651	10.2664	16.5792	0.09569	1.10909
CG5285	25	6.9	3R	3.11335	0.659458	0.209385	1.52967	3.28733	0.0668095	5.36906	2.78485	7.25815	6.01529	10.0185	2.50766
CG5287	18	13	2L	4.70786	3.78302	2.69642	4.57411	2.74671	1.8466	5.46639	149.908	13.3358	15.631	12.7395	241.251
CG5290	18	5.4	3L	7.74747	1.74541	0.953522	1.21857	6.92129	2.65247	8.94411	7.01878	5.08747	5.1922	14.7305	4.73384
CG5292	26	20	3R	10.0027	2.18691	2.7736	2.76995	12.5628	3.01095	2.33099	2.37182	0.806369	0.720628	0.634904	0.915869
CG5315	27	15	3R	26.5264	40.4033	79.5663	77.1588	23.6768	49.0593	131.571	234.827	100.352	130.858	113.415	137.447
CG5316	19	11	X	5.39436	3.88121	16.9268	19.9233	37.0887	22.3995	16.5031	14.1298	5.87052	9.85152	9.46763	2.33411
CG5323	21	12	2R	25.2287	12.0118	3.889	6.58001	24.7495	24.0541	95.7508	50.6396	17.5238	16.0091	69.0174	41.9819
CG5326	22	10	3R	5.65102	7.51316	4.72725	6.89074	2.34828	0.374139	13.2393	67.3251	17.2087	21.2059	5.66763	33.8583
CG5327	21	12	2R	1.44998	14.2194	0.0185024	0.0399053	0.0573975	33.7522	3.27656	150.566	0.723044	5.71532	0.587646	101.591
CG5337	23	14	2L	1.7988	3.95628	8.1323	14.8736	2.72839	1.12179	5.3632	7.09999	14.809	17.404	2.88938	24.6851
CG5339	18	11	2R	19.8278	7.03738	3.43181	7.15878	58.4224	26.3243	7.33688	42.1326	7.96856	10.6961	16.6431	167.792
CG5343	18	7.6	X	16.777	52.7799	2.91777	3.3515	15.3783	88.2678	0.052012	283.708	0	8.03459	0	922.71
CG5355	12	7.9	2L	140.959	75.689	9.50157	13.1872	70.7219	30.9738	60.7848	59.0359	35.5146	37.0354	83.7347	38.1047
CG5359	20	13	3R	6.68015	2.18106	0.719807	1.43284	11.7106	5.8581	19.1659	107.557	4.95775	8.14544	2.5651	28.0101
CG5367	23	7.4	2L	2.56746	0.0684405	0	0	1.09696	0.0233167	16.4265	0.05322	0	0	23.6506	0.497956
CG5377	28	15	3R	6.91156	5.26338	1.74686	4.07563	8.47245	0.913674	40.2896	27.7503	18.1768	26.7257	79.3004	6.13785
CG5380	17	18	3R	5.29811	2.85193	3.24851	2.59551	11.2668	10.137	14.7294	9.17584	4.57731	3.97434	17.7679	8.96077
CG5381	21	13	2L	2.7979	5.68325	17.9544	16.3837	5.31869	4.69195	241.164	96.1281	137.039	139.487	94.7847	2.32653
CG5382	20	11	3R	12.5057	10.7232	4.87867	9.3356	16.5777	24.1692	6.83936	25.5442	5.63538	8.59287	15.4866	43.2476
CG5384	22	11	U	51.1615	21.9813	7.23063	10.2393	51.0441	20.3331	53.8692	88.6953	22.2009	25.052	70.2579	49.8334
CG5389	16	10	3L	0	13.6968	0.00574719	0.044722	0	76.8655	0	74.198	0	0.448358	0	74.5041
CG5390	27	14	2L	7.88425	14.7509	22.6184	42.8619	3.11612	5.74524	155.808	88.0515	129.136	204.149	152.827	8.76272
CG5397	12	8.5	2L	3.8802	11.9944	8.39906	15.7491	0.151748	2.58507	9.48999	2.54041	14.2672	23.7393	5.24688	0.070833
CG5404	14	3.2	3R	0.33113	1.13377	1.12094	3.61587	0	0.081604	3.41695	1.60406	8.69708	12.5156	3.92091	0
CG5414	20	6.3	3L	4.24703	0.685758	0.602728	1.19184	6.43766	0.587134	11.8656	133.011	12.9572	18.1578	7.55713	104.696
CG5418	14	9.9	X	0.160009	0.419627	0.981597	1.06283	0	0.0414385	18.0495	6.89495	7.89186	7.65055	46.1083	1.89256
CG5435	15	10	2L	2.02443	27.1466	0.0503249	0.0665236	0.0376318	80.3417	1.55537	400.429	0.693942	5.93802	1.71068	215.19
CG5445	15	8.4	X	7.16828	4.98832	3.69909	4.19691	5.49987	5.09561	45.2234	27.4483	58.4095	54.74	82.1214	91.9593
CG5451	23	14	3R	20.95	4.70393	1.48393	1.97322	5.62054	6.26469	4.49593	13.7289	7.67069	6.48777	12.7479	26.7858
CG5458	17	10	2L	0.845237	24.5759	1.24387	2.87455	1.43157	91.382	0	465.917	0	5.53637	0.123267	307.586
CG5463	22	13	3R	5.17275	2.26812	1.41484	1.9566	6.08615	1.26455	43.088	16.084	32.3538	30.502	28.8949	4.51231
CG5482	11	5.9	2R	19.3477	31.3173	18.829	25.4528	45.4017	81.2311	79.6167	303.463	86.7752	95.7354	108.16	292.725
CG5484	16	12	3R	18.4686	14.2032	4.91758	5.7045	23.5262	22.0733	15.9505	90.9693	12.3459	13.196	24.5817	118.04
CG5493	22	9.6	2R	1.21931	4.66413	11.1239	23.0098	0.0250853	0.342533	633.71	161.979	335.665	285.701	469.394	13.0028
CG5508	15	9.2	3R	15.9651	13.9364	12.1857	10.2935	13.4716	11.8566	39.5005	45.8088	24.6749	33.6272	39.7903	65.0726
CG5510	22	12	3R	18.4609	13.1659	4.47042	5.84259	21.2399	20.9215	21.8286	89.1594	25.1487	20.5588	30.6575	110.491
CG5516	20	10	3R	10.2496	8.67173	5.08114	5.79929	30.834	49.0981	15.9908	126.021	6.42854	10.278	10.2306	120.553
CG5521	24	15	3R	7.08329	2.47651	1.8701	2.51864	9.32237	0.27133	6.3383	3.86716	16.7439	11.2556	13.9884	2.10347
CG5522	21	12	2R	5.29537	1.79213	12.9379	20.4757	28.8754	1.34129	46.8393	97.4084	18.908	12.3305	20.1624	54.4945
CG5525	24	14	2L	94.3055	17.9689	5.04763	6.57349	89.5937	50.2529	99.9729	99.2528	38.243	49.9977	139.249	48.9928
CG5527	28	15	3R	1.51649	2.16178	4.424	8.78976	0.315933	1.05655	1.49877	5.22692	1.09743	2.53604	2.82463	8.58406
CG5537	23	6.5	3L	32.4057	17.6839	9.24469	10.6631	32.2211	12.5921	11.0408	8.98012	3.14238	4.15569	11.1935	6.84876
CG5541	12	7.1	X	7.83252	4.15258	3.96633	4.24693	18.7036	7.1754	58.4301	22.5393	34.4076	44.8799	39.7213	2.1819
CG5543	24	15	2R	8.75587	3.59949	3.20696	2.86322	14.1827	5.20042	2.73193	3.27265	4.01132	4.53316	7.91846	5.61222
CG5549	28	17	2R	0.0537197	0.380232	0.970496	1.74681	0.00434539	0.0269352	2.14005	1.72966	8.11762	3.68035	8.84433	0.346811
CG5555	22	14	3R	11.6864	22.8373	6.76464	10.3723	27.4791	75.3075	9.97862	165.026	8.37302	10.7332	11.4447	184.405
CG5567	16	4.8	3L	12.5904	12.4523	9.87139	10.9107	21.4699	23.0018	23.1615	102.596	47.4111	40.0334	41.973	178.073
CG5589	12	9.7	X	9.10807	0.864367	3.47021	3.6195	24.9419	1.59639	7.12554	3.54272	1.97488	3.81257	16.6965	2.32018
CG5590	28	16	U	43.3567	40.8972	6.74381	12.8841	31.312	27.126	136.44	102.021	228.766	314.374	430.413	21.2446
CG5591	34	20	2R	6.72774	4.07018	1.95777	2.77207	8.89201	7.22364	2.21229	3.00711	5.05012	3.84637	7.96797	7.25956
CG5599	22	14	X	18.401	4.7751	2.88086	2.28762	15.3488	0.221166	42.1128	23.5916	34.2566	37.4059	61.2751	15.217
CG5604	29	16	2L	37.3863	24.8174	22.8535	33.4699	79.0328	30.4339	35.8442	249.763	37.3274	46.7667	47.6413	218.004
CG5611	25	16	3R	3.43255	2.52734	1.43168	1.82909	3.56387	2.35491	43.0694	20.9408	15.6383	16.7934	11.6069	5.25881
CG5613	19	10	X	1.43748	2.38006	0.408884	0.505577	1.22355	4.45301	1.21178	1.33645	1.53618	0.383752	2.27747	1.98266
CG5618	16	5.3	3L	6.03895	8.16268	9.23095	19.2962	1.24225	2.90645	2.54562	0.541263	4.50009	2.92131	5.43944	0
CG5639	21	14	3R	0.368259	2.12434	0.814153	0.986999	0.058019	0.911746	3.33051	4.79854	3.2498	5.64266	2.71041	1.14328
CG5641	26	18	3R	23.9351	15.9237	9.29241	16.9078	44.7618	78.112	31.162	77.2041	34.9691	47.091	37.867	60.399
CG5645	18	5.6	3L	17.6405	6.67116	2.28492	1.76577	14.3596	3.2495	9.16008	3.89911	7.1752	7.23341	24.9952	4.98525
CG5646	20	11	3R	3.13167	6.91083	1.71524	3.32198	0.509421	1.00712	41.5145	28.0935	61.8999	47.9317	4.88598	20.4689
CG5660	26	9	3L	4.28166	7.79902	0.702503	1.26099	7.02234	42.8925	3.11753	4.96779	4.19075	5.11486	4.72863	3.77933
CG5687	23	7	3L	2.30614	6.14738	4.87836	8.53738	0.0506206	2.25941	2.08281	1.54822	6.8376	6.82015	3.02814	0.074024
CG5694	21	10	2L	8.71022	0.903159	4.73324	7.32538	45.6803	0.432207	26.1243	12.833	13.8221	8.24244	21.7422	2.72115
CG5703	18	13	X	47.5478	122.171	29.228	29.3644	20.9955	58.9102	71.4412	87.0376	109.854	88.4239	66.5471	77.8322
CG5718	18	13	3L	0.00807158	15.8001	0	0	0	174.611	0	371.82	0.156685	5.80345	0	636.059
CG5721	17	10	X	21.4562	16.487	5.85813	8.7522	24.4407	99.9609	3.86377	5.38811	3.46216	3.45194	11.5906	10.7401
CG5726	21	14	2R	18.0348	3.41197	6.0798	8.20164	39.1232	8.22621	7.36801	4.15375	12.1882	11.9942	18.5259	6.09659
CG5731	25	14	2L	0.0421728	1.80741	0.3662	0.630015	0.0285817	1.51772	25.8811	13.0044	19.4776	18.8767	5.76145	0.69026
CG5742	18	8.4	2R	5.98116	1.84308	3.13407	6.30157	11.3767	1.84835	2.10979	60.654	3.04142	3.51486	5.46886	68.7863
CG5745	11	8.2	3R	12.0985	4.08686	3.66765	5.4243	21.994	6.86824	7.3843	12.7881	16.1569	10.8128	16.0915	15.9743
CG5746	24	12	3R	34.7991	4.93856	11.4105	17.1676	93.6799	1.04052	1.90482	2.04894	14.3813	6.89732	7.60625	6.60704
CG5756	21	16	2R	0.00337043	0.00788894	0.00800925	0.0112365	0.00226145	0.024042	1.11979	1.04714	4.02158	5.01232	0.243282	1.31753
CG5757	17	11	2R	28.4166	2.17787	1.4824	1.28235	53.1479	5.72106	10.2774	0.949747	3.49944	2.32025	16.0406	0.727706
CG5758	17	11	2L	1.27651	6.21854	22.5142	38.2376	0.307368	0.666824	22.6585	12.764	78.7955	90.559	6.95385	5.29442
CG5776	18	12	2L	15.0914	0.879351	0.809891	0.804916	18.1914	2.4751	6.08929	2.05492	2.38897	2.76099	10.3609	0.962866
CG5789	17	11	3R	23.3702	3.71262	5.28892	6.86055	26.0235	3.58303	5.05291	3.47599	3.8844	6.04869	6.59901	0.938131
CG5793	12	3.6	3L	8.39077	15.8026	7.2661	9.3631	2.82829	21.5592	5.26202	3.09294	9.78744	13.0135	7.77857	0.513939
CG5794	31	17	3R	7.80537	7.05548	4.68947	6.58453	14.7069	13.1912	0.968189	7.71521	1.86711	1.52486	2.40998	11.0377
CG5800	23	16	X	15.0633	2.09252	6.15594	5.44564	50.6784	9.66608	1.92046	4.77044	2.21875	2.13511	7.72817	5.19903
CG5807	21	12	3R	5.27388	9.4327	0.669896	1.51693	8.86091	23.0175	19.1454	35.928	5.48867	7.75192	9.81542	25.3311
CG5808	21	12	3R	7.03566	2.35401	4.40801	3.44797	28.9123	4.36653	4.72504	1.94735	4.66783	3.44143	5.7118	0.932423
CG5815	12	8.6	3R	5.76312	2.60311	2.63386	4.275	11.3914	4.59455	5.2299	8.73594	10.4251	10.9828	14.3808	16.8717
CG5819	16	8.6	2R	3.46995	7.22978	6.46219	4.62083	0.0963732	1.50573	34.1872	21.6792	7.59139	20.6761	71.3033	1.77989
CG5828	19	12	2L	16.8384	6.10846	3.66306	3.75786	17.368	7.65136	20.054	53.8204	10.6964	10.6167	14.2998	101.368
CG5830	9.3	3.7	3L	1.94766	1.792	5.07391	6.39912	5.16883	0.427133	18.7664	8.37959	58.9464	39.1503	51.8477	12.1623
CG5844	27	15	U	25.6332	22.5663	2.66616	5.2058	18.1272	65.3407	77.3155	64.8208	52.0987	36.982	51.5337	58.1123
CG5846	17	9.5	2L	10.8696	10.209	1.96919	2.46639	8.6157	12.1907	10.3905	3.51056	19.7152	13.6493	10.0728	1.0941
CG5849	7.4	5.1	3R	0.759599	1.07687	1.91888	1.59416	0.049889	0.0205522	27.2936	5.05363	13.1945	24.3442	13.5026	1.54632
CG5850	13	11	2L	15.5633	12.7915	6.74548	10.5379	18.251	15.1146	2.97578	14.2417	6.32085	5.74394	6.60287	39.6255
CG5853	18	11	2L	6.49355	5.04574	1.39808	7.06501	1.68406	0.602888	76.5533	44.0132	52.6545	88.5832	120.379	4.99621
CG5854	21	12	3R	9.36397	6.90701	7.53111	8.79053	37.1371	19.3053	16.4378	21.279	9.80854	10.2761	19.0752	8.2308
CG5861	23	13	2L	19.149	8.82807	5.79686	9.71532	25.1326	36.0275	39.4697	42.2838	87.1475	75.6944	112.581	54.1411
CG5867	14	6	2L	7.98985	22.0824	32.0196	40.5449	0.536627	3.73415	411.887	344.094	607.216	902.399	178.804	7.61859
CG5885	24	13	2L	88.114	50.4335	27.015	25.0677	70.1961	89.2674	583.538	371.222	59.2522	74.9788	265.886	59.2372
CG5886	25	15	3R	14.3142	27.52	2.45309	3.55032	34.8576	97.257	15.9902	363.797	14.2832	17.2405	22.2903	411.574
CG5895	26	7.4	3L	0.946824	4.26581	13.3687	31.6156	0	0.61203	5.97142	3.96212	16.7196	20.3266	1.15055	0.185526
CG5903	16	10	3R	61.7292	91.3567	40.7956	57.3788	44.0734	122.082	170.634	382.16	114.154	121.065	52.1362	202.083
CG5913	17	10	3R	20.5615	8.35894	3.26267	6.40123	30.0519	12.3197	7.35923	9.84253	7.43424	8.67703	12.6727	19.3005
CG5916	18	11	3R	12.8786	1.98278	1.7666	2.97642	20.2937	1.2345	13.052	19.7523	22.7207	22.2848	13.9716	24.6151
CG5921	15	10	X	0.686587	0.809044	0.260645	0.473173	0.102692	0.0807602	4.11773	3.70647	9.33797	8.92532	5.50401	4.91362
CG5924	12	6.1	2L	8.16007	0.882769	0.336373	0.579184	18.1936	0.335449	8.95551	10.7578	2.48869	3.62478	8.85456	7.81047
CG5937	29	16	X	0.247829	1.45702	4.3493	8.45111	0.0175238	0.0203846	3.35492	9.36529	9.21691	9.5545	2.00544	7.69511
CG5938	9	6.6	3R	10.2212	13.2426	11.509	16.4751	15.3987	26.2389	5.11888	139.034	3.52943	4.82155	3.02621	103.959
CG5941	29	16	X	23.364	7.37307	4.71672	6.486	26.4384	10.4784	304.724	188.818	53.9084	86.2334	83.0401	51.7117
CG5946	24	6.1	3L	13.3965	20.429	31.7095	47.9865	16.261	17.5175	70.4982	88.5558	151.777	146.811	112.915	66.8576
CG5953	9.5	6.4	2L	1.30375	0.695491	0.371768	0.518865	2.6972	0.207405	21.8391	7.97713	17.3108	13.2727	13.6603	1.87419
CG5958	15	9.8	2L	25.5805	12.2794	13.2003	28.0862	11.5703	10.5692	11.145	12.823	149.533	164.311	236.082	29.0015
CG5961	15	7.3	3R	9.97276	6.62587	4.26102	5.45226	8.34859	2.20217	17.9165	81.4454	21.3773	28.4852	22.4516	174.378
CG5964	20	5.9	3L	0.019679	2.34551	0.0503075	0.190941	0.00814268	24.3744	0.03297	16.067	0.068154	0.308913	0	42.7827
CG5966	18	10	X	7.39436	4.08105	4.85862	2.86117	15.1554	6.55662	14.1751	7.85673	181.141	134.152	160.273	5.08378
CG5973	6.3	7.3	2L	4.4792	5.92422	5.9232	15.6222	0.694619	0.441234	41.9334	23.8963	67.1831	83.1388	46.2596	2.13957
CG6015	20	15	3R	16.069	9.40918	9.15284	9.57675	29.5429	28.2528	14.3863	10.512	18.0063	17.058	23.0109	13.7846
CG6020	16	5.8	3L	28.0776	67.4942	18.2324	23.8604	13.2268	69.1553	122.391	80.6599	341.044	302.526	140.677	58.9465
CG6028	25	11	3R	29.9601	30.7373	7.69841	15.6181	14.5614	11.4777	75.2927	35.43	57.2838	75.2007	120.87	5.4244
CG6040	29	18	3R	0.460667	0.952209	0.673189	1.29365	0.290789	0.651288	7.12854	3.70621	14.0333	11.3648	18.0155	1.43991
CG6043	17	6.9	3L	1.49166	6.87373	6.8864	4.63068	0.641595	0.613458	21.717	14.548	45.4587	39.8557	26.8231	17.7353
CG6051	17	9.3	3R	3.98107	3.18404	2.15205	2.77922	7.92385	10.8474	0.87934	1.66488	3.51484	1.54935	3.23325	10.3401
CG6053	18	6.2	3L	0.00405467	0.149472	0.00657881	0.114352	0	0	1.59386	0.187222	1.23048	0.721144	0.165676	0.155397
CG6055	15	9	2L	0.15492	0.828509	0.00344627	0.0196863	0.00276951	1.46004	2.22793	0.718242	10.1347	24.7596	13.3065	0.390243
CG6073	19	7.8	3R	10.2745	2.0185	0.941366	2.02256	21.7546	12.8779	29.8649	246.679	5.17654	10.0187	30.3637	306.766
CG6074	21	12	3R	2.31718	4.58872	8.38705	10.559	0.298007	1.35265	27.0901	24.8529	7.6352	19.3502	177.008	6.39027
CG6084	13	3.8	3L	41.0715	23.2609	22.1381	59.4913	74.984	30.316	16.979	174.739	58.6867	53.8541	40.2153	223.875
CG6094	13	6.7	2L	12.6547	14.5151	4.262	7.47581	17.4581	51.0145	18.4889	15.1091	53.5678	39.5804	58.2909	28.8276
CG6115	17	11	2L	42.1262	85.5575	298.767	271.608	63.3372	82.2418	335.16	166.81	80.42	105.452	61.1873	43.3596
CG6125	19	5.7	3L	2.15069	8.19394	0.523407	0.979282	0.103601	1.89521	34.637	17.7658	24.9299	27.3413	75.8916	9.80198
CG6133	21	12	X	12.2032	4.17509	3.27909	3.52384	12.7345	7.8224	13.2766	8.63521	9.56919	9.32373	37.9417	6.99923
CG6136	11	7.2	3R	3.73785	6.38994	0.540677	1.61498	1.87992	14.8428	6.1574	3.90374	4.85202	4.72804	6.2213	1.26298
CG6142	26	14	3R	0.218649	0.168967	0.498046	1.11629	0.031307	0	0.455226	2.33378	1.23611	1.88866	6.74295	1.19473
CG6144	20	11	2L	12.3796	6.09138	8.38888	14.5652	24.502	14.7975	5.86723	18.1757	13.6054	12.8973	16.2064	66.3285
CG6153	7.8	6.3	2L	11.5733	13.9418	1.10279	2.41085	13.2114	30.2891	26.5485	57.4017	19.7168	12.84	53.1054	136.161
CG6154	18	8.8	3R	0.0282034	0.314385	0.659155	1.00579	0.0011472	0.53053	8.83747	3.05762	17.6473	20.1365	3.38646	0.929184
CG6163	14	4.1	3L	3.02117	5.11823	0.785316	1.25471	7.10377	7.67465	2.81922	0.389748	4.8441	3.06854	0.60568	0.175004
CG6175	12	4.3	3L	6.23924	1.80756	6.62538	6.84089	18.4203	1.84018	2.82703	0.444319	13.2623	5.23112	9.97392	0.174993
CG6178	18	8.7	3R	27.1941	20.7793	6.01555	9.82473	37.215	14.4002	190.286	111.93	109.184	166.981	453.668	24.6287
CG6179	15	5.8	X	9.58818	5.93846	3.37432	5.21935	24.6463	20.5666	4.36343	209.971	7.26105	9.50567	10.5266	317.431
CG6180	11	7.3	3L	78.0864	50.7793	26.3066	27.4157	92.9666	180.501	0	281.212	0	2.41592	0	401.542
CG6184	22	13	3R	0.286281	6.97328	3.64128	5.72747	0.0274565	22.5759	4.72303	5.50563	16.6202	22.2584	0.638965	7.06614
CG6191	8.9	8.1	2R	3.70832	3.46568	5.21667	7.67066	6.2425	1.02095	4.90613	5.01646	6.22605	5.29126	5.04081	1.06301
CG6196	21	11	3R	3.25359	3.07216	4.36142	3.72682	3.78771	4.19848	12.1803	8.60203	8.35707	6.53897	6.2298	9.97567
CG6204	22	14	3R	2.31892	2.77049	2.63575	3.96884	3.94083	1.84721	18.6603	15.5981	22.1471	28.7873	21.5591	13.8067
CG6206	27	17	2L	36.8232	47.0804	23.1669	41.8676	5.06811	13.1969	29.636	15.7793	39.3422	48.3002	55.7352	3.8589
CG6225	16	11	3R	0.752592	4.60187	2.22923	2.78633	0.0421398	1.4691	12.8578	6.93087	15.2618	17.7311	8.78928	0.91929
CG6232	29	14	2L	0.151091	0.946678	0.355901	0.527672	0.14007	0.135132	4.41684	4.09499	5.59849	4.83085	5.07639	2.72703
CG6236	16	12	3R	15.1067	4.32871	3.85041	5.8085	18.5795	6.97119	11.7674	26.4068	7.97236	9.15855	8.45552	20.477
CG6259	17	4.9	U	16.9257	26.5168	21.4127	26.8901	24.072	85.3465	30.0598	87.3344	39.7548	33.3393	59.827	82.9725
CG6276	10	4.6	3R	16.2382	8.25247	8.78298	12.3856	27.433	12.2596	1.82843	5.7134	5.7633	3.39565	7.10076	16.6357
CG6279	30	8	3L	0.0630875	50.4866	0.143241	0.297883	0.0611339	154.373	4.58224	2.18831	1.21557	4.20437	15.2623	0.87366
CG6282	22	11	3L	0.16725	0.829308	8.73066	13.6646	0.0645423	0.0533097	9.31253	4.34302	26.6226	33.7547	0.332754	0.643887
CG6287	17	12	2L	31.7787	20.8305	11.8014	15.9648	21.6859	5.05083	272.788	156.831	534.177	580.129	922.281	35.3935
CG6293	12	10	3R	24.6299	6.78621	2.55711	6.31639	37.525	0.263731	45.1075	28.4766	26.0075	28.7587	244.482	10.2021
CG6296	13	8.7	3R	5.80805	2.42451	0.00390708	0.0837497	0.018368	0.00154111	38.4967	29.1604	0	0	40.4746	0.561534
CG6299	14	8.1	X	7.12761	9.3635	13.0673	18.1426	7.85982	13.5926	8.30721	7.43244	11.465	17.5917	32.7066	1.25683
CG6310	15	4.9	3L	3.30861	2.94519	0.157221	0.872238	1.73799	1.03686	5.65893	3.65349	8.49255	11.6475	14.2178	1.83859
CG6321	19	7	3L	5.14967	4.21742	0.962982	1.71088	14.7006	13.808	70.8971	34.7728	13.4146	15.6129	106.272	8.04869
CG6325	22	14	3R	7.40975	3.64477	1.84345	3.41158	18.1769	9.4073	3.10065	5.02779	4.40779	5.54972	6.9401	5.56391
CG6329	16	8.4	2R	0.849038	4.08182	35.8453	56.6028	0.090477	0.260107	10.7798	4.35015	241.114	131.899	1.81422	1.39375
CG6332	24	13	3R	0.0591182	70.2987	0.303241	0.155286	0	416.834	4.90245	852.009	6.28149	17.1995	3.42174	787.546
CG6337	16	12	2R	2.0965	4.75564	0	0	0	2.84057	60.7926	53.871	0	0.172623	412.54	31.5742
CG6345	12	7.2	3R	2.66281	2.81833	1.79059	1.87239	2.1042	3.67032	3.42151	1.40524	0.610185	0.592277	0.226771	0.109406
CG6347	18	9.4	2R	0.0180183	0.108551	0	0.0153305	0	0.242384	2.04399	0.859625	1.05011	4.27912	0.274751	0
CG6353	20	12	3R	5.309	1.73939	1.2568	2.0668	5.95348	0.77655	11.6268	13.6536	2.76194	5.14705	8.51466	4.71055
CG6364	18	7.8	3R	7.94867	5.2529	5.51105	7.74234	11.927	4.43452	32.4371	34.1132	31.3738	30.097	35.5146	20.5725
CG6379	27	16	X	7.2747	4.53302	3.18763	5.57095	9.35645	8.42634	37.4992	28.1712	50.5708	50.5563	59.2677	27.5387
CG6385	15	10	2R	2.18441	4.65244	0.950699	2.44505	0.00131409	0.0206001	4.73753	3.27109	38.4757	42.0934	45.2697	1.45446
CG6388	16	12	2L	10.2758	5.35614	4.08106	4.11669	7.94745	4.66336	6.57686	3.44865	6.37777	7.4184	12.8694	2.69955
CG6398	17	9.8	X	3.76096	2.18453	1.97979	2.32234	9.0351	2.07822	120.15	64.456	86.4299	101.83	91.034	5.628
CG6404	17	4.8	3L	19.1153	22.2502	2.20468	2.79352	27.6081	66.8067	17.6285	32.7383	25.6431	24.5773	40.9629	40.9458
CG6405	17	10	2L	0.135925	4.03948	2.89293	4.32658	0.0202524	21.0374	1.58353	19.8371	1.29859	1.40657	1.47255	27.6883
CG6406	19	10	2R	16.125	7.76339	7.71435	9.81708	29.0403	15.9889	1.2382	5.36266	2.51337	3.342	3.89376	6.25716
CG6415	15	10	2R	5.63106	8.91655	19.0682	25.3056	0.166647	3.36814	18.753	12.4757	26.5993	34.2648	30.1185	26.2688
CG6418	23	7.3	3L	12.1838	5.47562	12.9252	20.7916	46.8459	12.6684	4.71759	3.24958	5.75531	6.70559	7.59554	4.82023
CG6420	24	13	3R	10.3558	8.80236	6.9283	11.0298	17.6376	18.2516	2.74703	4.21346	8.21655	5.9539	8.08758	7.08224
CG6422	21	13	3R	13.664	7.80817	9.28962	12.255	55.229	2.21951	31.6665	89.9102	41.4397	35.8239	55.823	196.006
CG6424	18	11	2R	4.49479	11.2271	31.6711	46.2996	7.78705	3.51742	33.8048	109.906	132.524	78.2011	73.3599	238.464
CG6426	21	10	2R	7.42664	16.443	10.151	12.8836	0.0929305	1.14764	77.9196	33.834	96.7391	117.849	78.4883	5.00773
CG6428	28	19	X	7.26702	4.6237	1.0993	1.73106	6.75746	1.05726	35.3005	25.3638	55.0157	79.5416	71.6302	23.283
CG6432	17	10	3R	4.99077	11.1143	0.00723987	0.0882279	0.157012	0.347929	8.87855	13.1104	0.174259	0.308018	143.015	3.43527
CG6439	25	12	3R	43.3835	110.459	28.774	32.9068	32.4845	254.026	855.9	476.264	808	755.468	146.646	218.923
CG6443	3.8	3.1	2L	6.01008	7.02572	4.58588	6.11683	11.5275	38.8055	12.5659	12.3533	17.1319	16.9687	21.3351	16.6483
CG6453	30	19	2L	37.3409	15.6827	9.76089	16.6677	66.3242	25.9635	26.5095	23.1169	13.4086	12.7545	23.6661	23.5084
CG6454	20	12	3R	10.586	5.57352	7.31107	10.7642	12.4893	1.72772	11.0924	12.8031	10.5501	12.1861	12.1266	20.0787
CG6455	23	12	3R	31.5404	61.2734	29.9428	41.7724	36.5301	137.434	190.498	196.946	265.729	225.805	136.142	154.262
CG6463	22	6.7	3L	33.5181	72.8971	16.775	19.9767	14.9818	25.9466	295.862	90.6714	496.488	454.819	196.482	55.4716
CG6465	17	9.5	3R	2.09763	6.22065	1.6625	3.95472	0.0642866	4.59044	15.3821	10.86	56.4029	63.0204	69.7446	5.86655
CG6472	13	6.2	2R	0.0393343	0.278855	0.0696954	0.163967	0.00164629	0.111478	2.74768	0.951173	4.00058	4.71651	1.2729	0
CG6479	21	5.4	3L	7.23994	6.94105	1.39018	1.73799	31.9777	19.6638	6.19399	2.89589	3.81755	2.35136	13.551	3.27623
CG6488	27	16	2L	4.39985	4.3732	3.6394	5.14653	5.16303	6.36388	9.73776	10.4877	13.6532	9.53596	16.3003	10.8761
CG6490	16	11	3R	0.158102	0.156997	0.490363	0.789586	0.687228	0.052739	1.70399	5.10927	6.80443	5.50263	4.61918	16.2472
CG6498	12	6.7	3R	10.2634	11.5585	13.635	23.1943	19.8702	13.7122	116.464	111.431	88.5359	81.1861	225.885	44.5064
CG6509	27	16	2L	11.0997	4.46401	2.57342	3.9975	14.4718	1.80368	10.4953	6.58714	20.1913	18.1742	19.5111	3.75034
CG6512	22	11	U	25.5103	40.8508	10.9755	17.8793	25.351	88.9397	74.0126	204.717	59.6179	67.3573	52.8382	161.793
CG6522	17	12	2R	11.183	1.85325	1.01082	1.05548	13.737	2.53424	2.07209	1.99672	0.850426	1.30705	1.94188	1.1733
CG6543	21	11	2R	73.7278	43.8931	26.7715	27.8879	73.9312	48.0037	176.317	96.7028	189.125	233.004	342.523	17.9182
CG6550	8.2	7.2	2R	6.63888	2.30635	2.56933	3.78071	7.72977	3.08149	12.9902	8.75472	10.4701	11.9663	23.1012	17.4822
CG6565	17	11	2L	14.5689	21.1121	7.06746	8.68724	25.1963	53.9652	7.63545	212.401	9.08537	13.1587	12.2191	290.823
CG6567	22	9.3	3R	6.3889	4.20235	2.67255	4.06624	10.7865	7.13169	109.32	148.41	25.9348	39.8566	46.1777	45.4298
CG6597	14	7.3	3L	6.94017	5.80144	4.14998	5.66788	16.3082	14.2538	40.691	80.3636	44.3426	43.4846	13.7053	103.957
CG6607	21	11	3R	9.85904	7.48335	7.90981	9.81873	5.91656	18.3266	16.3048	21.0677	18.1026	19.2516	13.8362	23.011
CG6610	24	7.6	3L	10.5967	3.19631	6.38263	9.58976	31.5615	14.3706	1713.57	651.771	1265.33	1144.04	635.808	54.3522
CG6619	18	12	3R	0.175382	1.28883	4.60187	7.88701	0.0130677	0.0556753	62.7151	58.2348	107.241	150.129	192.1	41.2386
CG6638	24	6.4	3L	19.505	5.63924	4.53733	5.89291	27.0294	4.73149	54.2883	26.4468	57.3516	71.6746	113.525	11.5556
CG6652	15	10	3L	0.038174	59.0068	0.105618	0.286723	0.03055	447.305	0	580.34	0.208606	9.37186	0.088843	475.944
CG6654	17	9.2	3R	5.7895	2.62152	2.99956	3.04097	10.4741	1.13061	7.7765	3.58404	8.09553	7.65163	11.1197	4.39457
CG6656	21	12	3R	1.19629	20.0513	23.0215	41.2364	0.737518	41.2782	55.2167	41.7126	56.2264	51.8734	51.2366	8.45107
CG6659	26	17	X	14.2247	11.5618	3.81941	6.78229	14.1795	9.2013	10.5471	45.6164	9.03649	8.98189	15.3073	28.782
CG6660	12	7.8	3R	9.37308	27.7345	0	0.175907	0.0423972	0.0960444	119.477	88.5473	0	0	142.839	3.83676
CG6662	19	11	3L	18.0961	12.9447	0.24782	0.328473	21.0916	49.895	49.7245	226.472	31.763	62.3241	96.232	321.016
CG6664	21	5.8	3L	16.5085	20.9615	6.0418	11.5185	36.963	77.8484	10.0792	5.61985	20.6008	18.2557	24.8163	4.44392
CG6672	19	13	3R	21.1891	11.2025	3.37487	4.82908	22.3807	17.8564	8.55255	65.7434	9.61396	11.8356	14.7195	78.2091
[truncated: 2,922 more rows]

## Sheet: G.morsitans_48h_post_blood
gene	Fcov	Mcov	chrom	DFbody	DMbody	DFhead	DMhead	DOvary	Dtestis	Fbody	Mbody	Fhead	Mhead
128up	6.5	9.3	2R	38.6798	16.6613	13.609	10.563	77.9516	76.6125	74.9102	48.3471	44.2051	51.0631
14-3-3epsilon	6.8	9.5	3R	64.9067	28.3623	473.269	396.074	426.206	198.578	280.672	250.283	453.928	529.393
14-3-3zeta	6.1	8.4	2R	30.5376	25.7217	76.2853	100.539	48.6616	11.3422	1452.02	1165.46	2258.38	2419.58
140up	6.5	8.9	3R	7.02224	3.83363	3.64108	5.22436	14.7333	7.49638	245.676	241.23	167.063	179.704
18w	5.5	6.8	2R	4.487	5.48968	9.7792	13.5263	2.79706	1.11498	3.49452	2.2064	10.1933	8.61954
2mit	5.6	8.7	3R	0.0540779	0.245258	4.00707	5.73127	0.0425977	0.105596	2.93315	3.30238	34.2914	30.6462
312	6.6	4.4	3L	2.99806	3.83704	0.734329	1.74999	3.37925	15.6395	176.856	198.233	106.548	136.375
4EHP	5.6	7.6	3R	1.25793	1.34229	13.6658	19.6295	10.5855	2.23701	28.9061	19.1848	22.2838	28.8524
5-HT1A	6.3	8.5	2R	0.0148059	0.119081	0.526582	0.85999	0.00180979	0.0218543	1.30308	1.29453	7.13317	7.29516
5-HT1B	6.8	8.3	2R	0.600899	1.16757	2.18813	3.17199	0.00320434	0.0170508	1.91336	2.77308	25.9205	24.2015
5-HT2	7	9.4	3R	0.113669	0.622736	7.22942	8.25777	1.37053	0.528802	6.03815	6.63637	27.574	31.8705
5-HT7	5.5	8.5	3R	0.00947068	1.42776	0.135652	0.319876	0.00138609	3.61668	9.67435	11.6205	53.3989	53.1769
5PtaseI	10	14	3R	3.62181	1.37221	3.86258	5.5567	6.46438	0.212691	42.1992	41.3175	137.56	190.953
7B2	6.1	8.5	3R	6.49024	36.8465	68.4144	112.208	0.015162	1.17369	59.3554	73.9967	733.552	634.072
A2bp1	5.4	3.9	3L	0.173936	7.08658	1.33421	2.64962	0.310745	16.61	61.8473	73.914	276.125	279.309
ABCB7	6.5	4.6	3L	10.9242	13.0114	6.66551	9.80507	12.5919	21.4082	86.7148	93.0597	95.3531	107.036
ACC	7.4	9.8	2R	19.4521	30.4053	43.949	45.5194	5.71204	8.19945	308.41	373.159	269.888	295.642
ACXD	6.5	4.6	3L	1.11018	3.29416	0.0499641	0.220447	0.0668054	1.20411	12.2495	10.3859	3.6433	4.71535
AGO1	7.1	9.3	2R	11.8241	6.23054	31.189	43.2489	38.5587	1.78354	36.8611	36.5523	67.3538	74.2553
AGO2	6.7	8.9	3L	28.726	22.5249	48.891	49.4802	46.3269	25.4707	0	0	0	0.018069
AGO3	7.3	9.8	2L	0.351905	0.0489253	0.027995	0.0398062	1.40089	0.0769894	24.643	13.4332	21.7569	23.7041
AIF	6.2	8.1	2L	24.2522	22.958	3.55607	7.18157	53.586	52.9357	48.0719	27.4244	39.4307	34.7669
ALiX	6.1	8.4	3R	20.2494	25.5193	10.4341	15.3079	20.256	37.0159	46.4752	45.8508	64.5565	75.2366
AP-1gamma	5.6	4.3	X	13.3856	6.29172	13.0426	17.3172	24.0109	3.14987	40.5673	38.0667	87.5451	79.4951
AP-1sigma	6.7	9.5	3R	7.93336	4.20003	18.7839	29.2595	12.1162	4.57882	71.0474	35.6758	128.532	142.26
AP-2	5.8	4.1	3L	0.0178225	0.0922472	0.706264	0.884708	0.00170683	0.0356131	1.33743	1.76141	15.3999	16.498
AP-2sigma	6.3	8.6	3R	30.3537	15.5887	20.1617	30.987	28.2441	13.8904	225.562	212.71	266.607	437.03
AP-47	6.9	9.6	3R	31.0978	16.8776	13.3027	22.0085	44.005	16.0225	81.8773	56.8595	99.6697	129.032
AP-50	6.1	8.6	3R	26.8248	15.7224	9.38606	15.6745	27.4243	34.2324	46.2754	47.2571	126.419	164.323
APC4	6.4	4.8	X	7.70062	3.02263	1.13105	1.53148	10.7699	7.94156	19.6655	14.0346	31.6211	27.9961
APP-BP1	6.8	4.7	3L	7.24896	16.0197	2.96169	3.78434	9.93727	58.6781	23.8881	19.8079	38.6163	40.4649
AQP	6.3	9.1	2R	3.03756	22.2103	0.481252	0.757882	0.00762158	3.05592	136.922	179.82	142.74	160.518
AR-2	6.6	9.4	3R	0.217048	1.00559	0.0930078	0.474036	0.0207333	0.211085	5.0143	4.32043	0	0
ASPP	5.8	8.1	2R	0.293648	0.717224	1.56377	2.2715	0.154538	0.218939	19.8834	20.3179	43.2899	42.9788
ATP7	6.3	4.7	X	8.77773	13.0425	2.57457	4.46175	9.43285	41.6782	23.2578	16.6753	22.5327	19.7244
ATPCL	6.6	9.2	2R	31.9973	33.1843	24.7706	45.5931	30.5849	8.62734	351.607	398.756	224.347	290.272
ATPsyn-Cf6	6.7	9.2	3R	141.715	231.332	99.7905	121.369	113.944	116.335	5733.48	6176.99	2138.77	2214.19
ATPsyn-b	6.5	4.6	3L	176.01	286.262	91.5146	129.736	73.7068	241.249	5556.5	5682.68	2387.33	2185.37
ATPsyn-beta	6.5	4.6	3L	380.043	307.602	147.888	205.049	194.432	29.4544	6603.47	6889.77	2919.77	2071.27
ATPsyn-gamma	6.5	4.7	2L	170.514	299.755	74.2229	79.8216	78.9053	65.2423	7106.12	8017.2	2480.6	2568.11
ATbp	6.2	4.3	X	3.36218	1.32782	11.9282	17.0746	6.27729	2.11015	9.94122	7.91303	15.3115	16.8481
Aac11	6.4	8.3	2L	26.1633	15.8583	45.2958	55.1037	40.0192	13.2668	120.739	105.901	256.647	273.868
Aats-ala	5.5	9	2L	51.8592	12.3908	7.49904	8.22763	48.59	20.8139	55.5258	32.1285	38.3405	43.8831
Aats-ala-m	6.8	4.8	3L	6.57629	3.2417	2.00365	3.10918	8.43093	3.25387	16.674	11.2675	14.0462	14.8708
Aats-arg	6.8	8.8	X	23.8854	4.82002	4.92414	4.98373	34.6732	2.66792	70.6334	51.7136	55.8082	68.9252
Aats-asn	6.6	9	2L	60.4008	18.6879	13.5617	14.8189	48.4013	25.5757	174.966	107.996	168.911	209.625
Aats-asp	6.4	9.1	2R	27.8861	18.859	4.22326	4.15107	18.1532	3.59031	188.343	156.169	116.078	136.394
Aats-cys	8.1	8.9	2R	17.9378	4.52607	2.61576	4.12665	19.8911	8.46152	44.2272	31.0229	40.7971	43.7248
Aats-gln	6.8	8.6	3R	35.5037	9.65192	7.73459	10.2589	51.0003	16.1347	25.0922	14.6193	13.9272	18.1445
Aats-glupro	6.1	8.8	3R	27.2394	7.10092	7.16852	8.54454	39.5149	4.92795	37.439	28.6291	32.7221	36.5837
Aats-gly	7.3	5	3L	40.5573	11.7002	8.56341	10.9553	44.7457	19.3033	87.8156	65.9163	86.8774	94.3452
Aats-his	6.2	4.9	X	20.3374	6.09696	5.66331	6.39257	18.6952	7.4789	146.237	120.872	175.253	210.796
Aats-ile	6.3	4.5	3L	34.1424	7.08613	7.80843	10.61	51.0901	4.72219	109.403	56.3714	77.723	96.8961
Aats-leu	6.5	4.6	3L	8.42704	2.60685	2.19681	3.49015	13.0233	1.90802	21.482	12.5753	12.2716	13.6383
Aats-lys	11	8.4	X	54.4416	10.5414	8.65532	8.92655	47.8632	10.034	130.941	65.818	59.2366	62.0624
Aats-met	6.6	9.8	3R	1.53088	1.02896	0.290889	0.504397	1.05164	1.14342	35.0755	27.7422	26.5793	28.8749
Aats-ser	5.7	4.4	X	9.17952	4.22931	2.20886	4.05278	16.203	9.04694	45.1924	31.0673	33.1249	31.7025
Aats-thr	7	9.4	2L	47.7394	15.2115	20.1339	25.0138	54.3287	31.8058	115.234	90.8611	160.537	215.708
Aats-trp	5.7	10	3R	12.7846	7.68919	3.18294	4.93035	28.7786	39.1837	36.5377	23.3781	41.1591	39.009
Aats-tyr	6.3	4.5	3L	41.1556	15.3817	19.4827	19.1482	48.8193	30.3616	39.135	28.9215	25.0852	32.9165
Aats-val	6.7	9.1	2R	21.3481	6.40597	7.02357	9.03992	34.4881	7.69338	101.737	90.8488	165.598	172.13
Abd-B	5.4	7.3	3R	0.024006	0.212914	5.07853e-05	0.00178642	0.0049732	0.0607643	17.9239	6.73451	0.561926	0.480441
Abi	6.4	8.5	3R	14.7165	8.58435	20.2603	23.3897	59.8678	15.7913	59.7629	48.1651	57.6229	69.5399
Abl	6.1	4.6	3L	3.83796	1.51283	3.23535	5.06593	8.0556	1.4203	40.831	36.099	68.2	59.6059
Ac13E	6.8	4.4	X	0.499729	1.01718	1.61786	2.37026	0.425278	0.189739	12.2742	10.5273	27.0053	20.9972
Ac3	6.3	8.7	2L	0.129188	0.776669	3.05784	5.30742	0.0158815	0.0236644	6.40421	6.77422	62.9305	63.9779
Ac76E	6.8	4.5	3L	0.341106	1.4397	1.14261	1.36811	0.0302483	0.15077	64.8072	65.3486	83.0604	74.4535
AcCoAS	6.4	4.3	3L	21.6715	26.9598	46.9241	72.6774	7.48195	2.44233	61.4216	69.6773	250.714	235.801
Ace	5.2	6.7	3R	0.198961	1.0121	11.649	18.5997	0.10283	0.0852256	8.26613	13.6752	102.488	128.46
Acer	6.8	9.2	2L	21.5692	28.4942	25.5458	27.038	13.9628	57.837	226.17	189.102	117.709	96.3851
Acf1	6.8	9.3	3R	22.0847	3.75294	8.13411	11.9173	92.0757	8.73867	10.2645	6.68106	14.9171	13.8369
Ack	6.8	9	3L	8.51578	13.1904	6.17042	8.81484	12.8786	47.4181	18.0341	17.2458	33.4618	39.6072
Acon	6.3	8.8	2L	125.289	274.172	117.221	135.985	88.7784	15.7896	2931.8	3446.03	1312.83	1682.93
Acp65Aa	6.6	5	3L	0.668899	0.756729	0.513596	0.192987	0.0247682	0	80632.9	11850.9	4783.1	680.965
Acph-1	10	14	3R	22.9021	6.88151	2.65141	4.82817	46.2002	21.3543	32.6864	29.2825	36.0936	41.9387
Acsl	6.9	9.1	2R	15.3178	15.3565	17.8635	19.7136	15.3215	5.944	500.265	669.299	374.425	528.009
Act57B	5	6.6	2R	99.7335	289.602	327.972	278.064	21.7755	29.8426	12963.4	13204.8	6469.57	4130.78
Act5C	6	3.8	X	352.75	187.227	548.283	690.448	687.51	473.246	1418.3	1384.41	1299.3	1396.24
Act88F	6	8.2	3R	9.98041	56.8338	1.82889	1.39558	0.0636464	0.926075	45213.9	43992.8	3478.96	3334.43
Actbeta	7	4.8	4	0.147392	0.600684	24.9994	6.40054	0.00220152	0.00950292	5.01954	5.95097	21.7664	21.1453
Actn	5.9	4.2	X	12.4807	20.0922	16.9232	15.9334	26.8974	2.51573	1164.35	1221.87	464.485	341.255
Actr13E	6.4	4.6	X	18.6242	8.56321	2.02022	3.35473	11.0445	2.37074	38.1965	32.89	27.3587	29.1944
Ada1-1	6.5	4.4	X	5.11709	2.80232	6.59093	6.76081	13.732	12.9496	23.0213	21.2381	45.3874	47.6783
Ada2b	6.5	8.6	3R	25.5356	3.31109	3.59485	6.96747	59.9859	6.98483	31.884	19.2001	18.4905	19.7999
Adar	6.9	4.8	X	2.18153	2.18378	5.40901	9.70033	3.23801	0.292517	45.3725	44.6642	127.002	155.309
Adf1	6.7	8.5	2R	5.43798	2.79428	3.56839	5.10127	13.831	2.2394	22.4561	19.6568	35.5293	45.7494
Adgf-A	6.1	4.1	3L	1.88331	9.49727	0.849137	1.36183	1.45235	15.2644	58.5062	41.2054	25.842	27.6628
Adgf-C	8	8.1	3R	0.38705	3.63376	3.00826	4.21149	0.0726839	2.47187	283.944	320.005	0.129376	0.36253
Adgf-D	5.7	7.6	3R	3.62979	8.70195	21.3424	28.051	0.19755	1.7544	12.4827	14.8542	98.1289	94.9371
Adk1	6.1	4.5	3L	4.15569	21.3998	9.81015	15.5403	3.61999	55.8135	3286.1	3780.88	392.693	381.188
Adk2	6.4	8.9	2R	51.0415	20.3387	28.3648	32.1534	105.004	26.8424	298.845	395.49	170.793	224.837
Adk3	6.6	9.1	3R	6.64084	28.1296	3.51	7.37845	10.2028	182.423	66.3445	111.466	50.7821	80.116
AdoR	6.5	4.7	2R	0.101677	0.375242	0.453972	0.536292	0.0246652	0.0904246	4.71223	2.95106	16.357	18.4325
Aef1	6.7	4.6	3L	20.6871	4.48992	21.6454	25.1651	81.8833	4.84899	10.7182	4.53416	11.5976	10.6956
Ag5r	6.3	4.4	X	29.0652	52.7919	2.58263	0.388582	0.0291556	2.8684	0	0	0	0
Ahcy13	6.6	8.4	X	130.066	21.7071	23.679	26.6356	147.514	42.2684	46.7437	56.1781	28.5911	33.8517
Ahcy89E	6	8.7	3R	1.22955	3.97165	1.73111	2.27295	0.0421708	0.154991	211.02	173.025	37.2436	39.2447
Ak6	7	9	2R	7.70953	1.23722	2.3481	3.03679	15.0191	2.27504	69.9842	48.7915	37.0308	36.7858
Akh	6	3.7	3L	2.60403	10.305	1.46942	0.815472	0.0691441	0.0254185	1183.25	759.499	5837.18	3141.41
Akt1	6.5	8.9	3R	10.3628	5.22646	9.41089	12.7853	25.3095	6.07822	32.9407	32.2984	37.0423	48.8005
AlCR2	6.5	4.9	3L	0.0207152	0.140732	0.240297	0.444451	0	0.0967959	7.95735	8.27185	48.6591	41.5305
Alas	6.3	8.6	2R	28.0935	98.3677	58.9699	66.8236	39.1709	101.687	390.642	365.342	238.099	220.206
Ald	6.3	9.1	3R	55.5762	103.203	120.493	156.395	32.4788	80.5488	1435.26	1129.91	510.334	556.11
Aldh	6.6	8.4	2L	60.0497	92.6533	87.8369	100.475	53.3051	314.189	216.892	208.078	211.093	266.576
Aldh-III	6.6	9.4	2R	5.20434	10.8421	12.6945	21.3621	14.6735	11.3732	154.305	162.817	134.102	146.815
Alg-2	6.7	9.5	3R	4.61508	1.47853	2.14214	3.82674	7.57077	1.98747	197.981	176.247	188.891	210.577
Alg10	6.4	4.5	3L	10.8255	6.94613	0.734424	1.49272	6.53123	4.4649	45.8764	30.2079	83.2589	70.8041
Alh	5.4	7.7	3R	5.09609	10.1121	8.91126	7.57978	9.94956	2.36819	44.9557	46.3649	72.1904	59.5952
Alk	6.2	8.6	2R	0.313913	1.99627	11.7228	18.705	0.00739921	0.0260088	6.67637	9.09023	50.3163	48.5338
AlkB	5.5	4.3	X	3.98749	0.787387	0.805153	0.748257	4.35852	0.192807	11.3442	8.35461	19.6632	18.1802
Alr	6.4	4.6	X	9.98709	12.3004	8.31796	12.2273	40.1586	76.4549	88.4631	73.3134	74.2118	80.3488
AlstR	7.1	4.9	X	0.00811536	0.0169716	0.0201119	0.0631406	0	0.000300903	8.08654	6.50579	36.1958	29.5052
Ama	5.5	7.7	3R	0.265865	0.188038	0.0113963	0.0666194	0.0247751	0.292588	15.8882	6.56918	8.99626	10.799
Amph	5.7	8.3	2R	2.926	4.3442	8.81922	12.0556	6.90888	1.85438	120.078	107.416	321.655	288.787
Amun	6.3	4.5	X	36.6786	11.1859	90.3223	114.886	206.733	33.3592	47.4395	48.7033	121.981	128.787
Ance	7	8.9	2L	13.424	42.0853	6.38441	11.3791	0.677287	110.937	1611.57	1822.25	68.8417	68.8048
Ance-2	7	8.9	2L	0.0216614	0.0993807	0	0	0	0.592463	7.98735	3.9331	2.76871	1.73543
Ance-3	6.2	8.6	2L	0.124207	0.375621	0.2734	0.450853	0.00122911	0.047224	35.7918	21.5839	88.829	72.7104
Ance-4	6.3	8.6	2R	7.39672	7.75468	26.3628	22.7056	0.128315	1.36754	94.5876	83.7397	31.5282	35.1239
Ance-5	6.7	9.4	2R	5.94265	11.2796	7.03414	22.451	0.0558291	0.630803	80.5192	92.4133	45.7094	65.8784
Ank	6.7	4.7	4	8.45452	4.99074	10.7398	15.8192	18.2769	4.96091	189.261	196.656	215.446	167.113
Ank2	6.1	4.4	3L	0.611736	3.6516	24.3928	30.7939	0.0226254	0.484827	33.7853	35.0051	143.217	119.476
AnnIX	5.9	7.6	3R	15.4262	20.5274	11.5517	16.3323	9.92286	12.4472	288.187	225.913	373.472	370.823
AnnX	6.3	4.6	X	18.2959	32.1669	23.0942	24.8732	12.4134	27.0355	104.128	111.001	117.13	118.932
Antp	5	7.3	3R	0.0127057	0.0668953	0.0215518	0.0234532	0.00697338	0.253036	11.6862	11.3063	2.0603	3.11729
Anxb11	6.6	4.4	X	4.8295	5.96096	8.83263	11.4152	5.42969	12.4463	103.99	109.843	141.119	167.762
Aos1	6.5	8.8	3R	39.6322	8.19472	4.05971	6.38784	89.4861	43.3818	46.9687	30.6748	52.4084	60.0877
Apc	6.5	9.3	3R	6.38358	3.72022	7.71619	11.7978	13.6722	5.1698	13.6545	12.1063	33.2268	30.4894
Apc10	6.8	8.3	2R	8.83203	4.48838	3.48236	5.19619	21.4622	15.5953	103.871	93.7572	106.912	111.594
ApepP	7.1	9	U	23.573	10.8838	1.8505	4.81531	43.9359	21.155	130.709	113.393	59.9234	71.0073
Apf	6.9	9.1	2L	5.78672	5.54718	9.87588	13.0199	9.38894	17.0421	278.922	196.962	211.404	251.743
Aph-4	5.9	8.7	3R	11.962	30.1711	1.83998	3.91702	4.55692	24.0799	100.99	81.8196	104.529	105.683
Aplip1	6.4	4.8	3L	0.872412	4.66978	14.4083	29.7693	0.00826731	0.168926	23.3834	19.9274	87.5956	90.5968
Appl	5.5	4	X	0.279776	1.33795	16.4466	28.7365	2.49811	1.68257	33.1724	37.1833	465.877	465.007
Aprt	6.3	4.4	3L	11.7396	4.54327	6.71214	7.2267	14.8036	7.05921	65.5699	78.1735	28.5391	41.681
Aps	6.2	4.4	3L	34.5314	13.2329	40.8748	47.016	184.26	28.1284	127.38	76.3955	192.261	171.858
Arc1	6.3	8.7	2R	23.1558	36.0139	70.9681	77.0239	195.137	527.58	2337.15	1298.18	594.328	496.415
Arc2	6.3	8.7	2R	5.73709	1.42419	1.10634	1.88689	12.1113	1.49135	29.4915	31.2178	8.32953	14.5205
Arc42	5.8	8.6	3R	20.5655	12.0874	9.91446	9.63037	28.3567	13.3927	161.665	252.654	85.3217	137.164
Arf102F	7	4.9	4	38.6055	17.275	28.2991	53.9208	148.533	99.1746	305.167	259.099	269.914	349.649
Arf51F	6.6	8.2	2R	20.1452	8.92857	10.2128	18.9394	28.2741	3.45374	67.6549	60.8087	144.947	148.175
Arf72A	5.6	3.7	3L	19.8931	14.1895	13.138	19.9002	50.905	58.3029	43.488	34.9064	64.5865	62.4297
Arf79F	6.2	4.6	3L	52.604	28.0653	87.6336	118.926	200.742	31.1912	538.024	424.123	837.593	954.03
Arf84F	6.6	8.8	3R	7.86554	8.08922	1.92329	4.72199	8.53823	50.4119	83.4888	80.6458	85.9315	108.71
Argk	6.2	4.5	3L	22.2194	49.728	39.3218	55.6813	14.7439	26.3257	12008.1	13643.6	5303.45	5852.65
Arp11	6.6	4.6	X	13.6786	11.0821	4.15853	5.5497	8.16859	15.6509	29.3607	28.8672	44.1962	56.9087
Arp14D	6.4	4.4	U	19.6214	5.92643	3.77859	7.68149	28.4492	4.42596	52.9994	46.0671	84.3956	89.6126
Arp66B	6.4	4.6	3L	26.9955	9.72456	6.7933	8.78424	32.9726	11.6486	32.3737	24.5665	31.0053	43.8911
Arp8	6.3	4.4	X	8.2603	3.10805	0.380693	0.749444	7.22427	3.33945	10.66	10.3147	19.7912	18.9652
Arp87C	6.8	9	3R	25.7627	26.3663	10.1275	18.9327	28.7951	24.4204	24.7364	22.589	40.0157	47.0571
Arpc3A	6.2	8.5	3R	13.5926	7.98638	1.47495	2.19137	8.50126	6.63908	97.2457	73.4666	71.5281	108.707
Arr1	5.7	8	2L	63.3338	268.372	979.553	1452.53	0.0957351	10.0031	1966.32	2771.13	22638.8	25644.9
Arr2	6.7	4.7	3L	122.631	429.476	1819.97	2416.18	0.238095	4.45414	684.281	869.537	8716.9	10114.3
Ars2	6.9	9.4	2L	22.3505	6.29516	22.381	27.7541	115.731	5.68024	42.5124	33.0142	43.469	46.1089
Art1	6.1	8.8	3R	78.6616	8.9591	4.82297	5.93154	86.6722	17.4397	48.5489	28.377	36.2272	46.9344
Art3	6.7	9.7	3R	19.2362	5.21776	3.68915	6.9723	42.1403	23.997	22.6861	18.7527	23.8358	26.9322
Art4	5.8	7.5	3R	19.0521	1.57478	3.55126	4.6053	50.0048	0.909739	15.3886	12.3615	38.6217	40.7864
Art7	6.9	4.8	3L	9.89537	5.1058	1.80302	2.94377	10.0381	7.53505	34.0496	27.955	37.0655	45.7585
Art8	6.4	9	2L	9.90176	2.20776	1.50375	1.00106	6.87847	3.43816	37.2552	31.2985	33.8669	38.2889
Asator	7.1	5	4	1.40859	2.03707	12.3394	19.9145	10.2878	0.21193	43.7865	54.536	182.992	159.353
Asph	6.2	8.5	2R	1.99945	9.21626	13.306	14.1523	3.16088	4.6981	127.653	148.577	109.507	100.504
Ast-C	6.4	8.8	2L	0.453529	1.25332	6.02827	14.5323	0.00316205	0.319357	36.8569	33.2672	29.7026	58.4152
Asx	6.8	9.3	2R	6.87359	6.86257	7.87061	11.0644	17.2138	7.36555	9.97913	7.80804	19.3794	17.1223
Atac1	6.6	4.4	U	3.62074	1.94944	3.70374	4.58341	16.2069	4.06558	68.048	38.4134	70.2055	50.0393
Ate1	6	8.1	2R	9.30137	6.26458	6.49165	7.73639	19.7653	27.5452	101.179	76.6456	157.129	177.301
Atet	6.5	8.5	2L	2.14607	2.73803	6.46574	8.87746	1.32333	1.36395	30.2752	32.2171	146.781	161.413
Atf-2	6.4	8.9	2R	5.25341	6.7116	21.7532	31.3288	2.97005	3.97306	10.3725	9.43587	42.0149	51.9555
Atf3	5.3	4	X	0.380646	0.877009	3.55868	4.68594	0.597719	0.120486	35.7842	25.3852	63.9379	54.8602
Atf6	6.9	8.9	2R	0.69621	0.363915	1.07384	1.53176	2.76093	0.141717	33.6436	23.9645	57.0389	57.8269
Atg1	5.7	4.4	3L	4.32884	2.05604	2.65981	3.85047	6.7906	0.713818	94.8026	83.7319	159.002	147.565
Atg12	6.6	4.5	3L	7.85832	4.42495	10.3495	13.0813	30.5412	23.5407	48.4184	46.3072	31.3479	48.7908
Atg13	6.3	9.4	3R	14.5488	6.94179	9.1637	12.5121	48.8946	11.015	24.0068	32.9876	24.2077	30.8643
Atg18	6.7	4.9	3L	10.4935	8.15208	5.08416	7.754	10.9461	3.27942	42.4748	33.9558	78.9988	83.0881
Atg2	7.2	9.9	U	12.1454	9.29542	7.46475	8.32026	16.5798	7.61557	21.6247	21.1567	27.5003	35.1355
Atg4	5.3	7.7	2L	8.16885	10.5033	6.47284	7.35149	8.28979	3.72639	50.0402	45.9643	56.4323	59.5572
Atg5	6.4	4.4	X	1.59009	0.607522	0.622732	1.23283	1.52399	0.0807609	48.0225	35.3827	70.4944	64.7939
Atg6	6.5	8.3	3R	7.63272	6.61808	7.00598	7.53839	11.8957	14.3051	26.6907	24.858	29.9336	34.9634
Atg8a	6.1	4.2	X	26.0269	40.5566	91.7364	114.814	40.2465	20.5124	1137.67	1641.95	636.541	1231.88
Atg8b	6.2	8.4	3R	0	71.9751	0	0.0849635	0	424.893	0	0	0	0
Atg9	6.4	4.6	X	11.4031	12.6731	5.74936	7.08665	9.04317	1.70008	45.3477	47.2054	38.9123	59.1887
Atpalpha	4.5	6.9	3R	17.0638	29.8917	171.777	258.822	32.7549	7.99955	578.519	631.131	1715.18	1940.07
Atu	6.5	8.5	3R	16.8716	4.57054	4.51283	9.33272	36.1546	8.85124	28.2592	20.6541	46.3395	37.6786
Atx-1	6.2	4.3	X	0.259989	0.558369	0.0748015	0.363099	0.0998929	3.42824	24.6763	24.3671	22.3438	18.7409
Atx2	5.8	8.7	3R	11.7736	11.6319	19.8206	29.8553	36.6625	14.0411	35.8178	33.4239	81.1089	54.116
Aut1	6.7	4.6	3L	13.4604	10.3979	17.8254	19.8555	15.8561	11.9631	119.14	86.538	104.592	119.118
Awh	6.5	4.6	3L	0.0155609	0.169054	0.308845	0.485062	0	0.0346958	0.999147	1.12692	4.8641	3.90379
Axn	6.5	8.3	3R	6.16742	2.06741	3.11215	4.44122	16.9479	1.95533	23.1069	15.4631	33.291	38.0739
Axs	5.8	4.5	X	4.18194	3.17939	1.6242	1.76439	4.77295	0.761718	68.1806	76.2715	70.344	95.0669
Axud1	6.3	9	2L	4.59839	3.39105	3.08198	5.63275	10.9049	1.70696	18.6591	12.3295	27.7771	27.106
B-H1	6	4.6	X	0.0432088	0.187111	0.402066	0.649855	0	0	6.12473	5.16567	13.6019	12.5803
B4	6	8.3	2L	1.67945	2.19647	2.73091	2.7464	3.40635	24.1192	6.06548	4.40354	41.5358	38.3121
B52	6.3	9.2	3R	31.3179	16.8622	92.0776	110.966	113.313	23.1958	224.727	152.081	364.782	311.727
BBS1	6.7	4.7	3L	0.00795919	0.742208	0	0.05573	0	2.84706	0.902846	0.296398	1.19841	0.962432
BBS4	6.5	9.1	2R	0.051454	0.246477	0.124543	0.265616	0	0	7.38309	0.329703	1.72755	1.47484
BBS8	6.6	8.8	2L	0.0338992	0.293801	0.0670502	0.128019	0.0314431	1.62293	1.14862	1.68896	3.56527	3.89299
BCL7-like	6.5	4.7	X	9.98669	1.18899	3.3135	3.44924	42.3011	2.01914	164.181	90.1292	259.837	289.401
BHD	6.4	4.6	3L	196.609	105.773	1.53861	2.88186	1.61147	6.39573	19.3412	12.8138	25.4205	27.9568
BM-40-SPARC	6.6	8.6	3R	24.1182	48.4229	92.8346	96.909	4.72027	15.1212	504.474	542.478	750.757	826.955
BRWD3	6.3	9	3R	14.8006	3.66922	3.38329	5.53688	23.5691	3.72404	19.1702	15.0198	25.488	23.6026
Bace	6.3	7.4	2L	705.241	485.453	0.113659	0.475119	5.29868	28.9371	1.65411	0.440346	0	0
Baldspot	6.7	4.9	3L	6.02632	7.48609	16.8055	13.6678	8.09538	4.61515	179.969	176.822	324.971	323.721
Bap	6.4	4.3	X	31.9669	18.443	17.8632	27.0564	35.7254	11.7703	43.3049	39.8235	100.23	117.859
Bap170	6.2	9.1	3R	20.1776	6.63445	1.96417	2.96153	34.3633	7.96223	6.36328	3.21516	6.06476	3.66553
Bap55	6.4	8.8	2R	18.5908	4.59062	2.78871	3.15096	25.8006	6.63109	31.2559	21.1375	42.2664	45.1101
Bap60	7.3	5	X	34.4783	6.29254	6.74859	7.57962	53.3496	7.41756	42.5244	29.3617	56.7832	59.7268
Bem46	6.8	9.1	2L	7.67938	6.38036	4.00161	5.68607	14.1624	20.2174	28.8774	26.6264	52.9992	56.1402
Best1	5.6	8.7	3R	4.72729	2.40755	2.194	3.63449	8.71683	0.759682	19.0316	14.0749	20.2222	20.0926
Best2	6.4	4.5	3L	3.5816	4.30911	3.25949	5.63602	4.23492	3.28501	45.5319	51.6566	51.9162	73.2172
Bet1	6.7	4.8	3L	18.7395	21.6079	14.172	14.6402	22.0381	36.8871	237.03	231.518	222.856	195.803
Bet3	6.8	4.6	3L	10.1196	5.68598	4.22439	7.33104	18.6905	16.8149	249.299	180.771	414.818	325.366
Bet5	7.6	9.6	3R	6.11283	3.35911	4.54859	6.94975	8.59372	5.88407	93.7424	85.5004	57.1583	70.8233
Bgb	8.6	15	3R	15.2571	5.96191	18.7672	29.2846	73.7028	15.8813	74.5114	54.8383	95.6583	154.041
BicC	5.9	7.3	2L	95.3988	11.5242	0.713293	0.0187099	373.562	41.8039	41.0057	0.043185	0.061866	0.095361
BicD	6	8.6	2L	9.80869	3.06918	5.31465	8.95737	25.6114	3.22072	44.9663	37.4216	112.085	143.721
Bili	6.2	8.3	3R	0.195953	1.24663	4.81631	6.58581	0.0245427	0.457175	2.20948	1.93018	21.3321	18.4238
Bin1	5.2	8.9	U	17.8993	4.17011	3.92646	3.76168	24.48	8.38154	46.5724	36.7132	39.7962	43.4147
Bj1	7.2	5.2	3L	75.0226	13.1951	10.9635	11.8788	260.113	102.039	35.5851	13.4238	40.3447	32.69
Bka	5.8	8.3	2L	14.1368	3.70454	10.0536	9.25348	40.6964	14.5494	66.789	56.3485	48.3544	52.6551
Blimp-1	6.4	4.8	3L	0.325884	1.68121	4.03159	5.08343	0.0326081	0.135326	23.7732	17.5978	29.8034	18.8063
Bmcp	6.5	4.6	3L	0.753984	1.31	1.18334	1.53949	4.7997	0.971326	25.4016	25.5493	15.2743	17.165
Br140	6.1	8.8	2R	19.5823	4.85833	2.52997	3.2354	40.102	13.0497	6.66643	2.9481	9.49482	7.73613
Brd8	6.1	8.5	3R	8.59576	3.14105	3.43752	4.25756	15.806	10.9626	4.73854	3.541	8.02638	8.80629
Bre1	7	4.7	3L	23.737	4.44183	9.59583	13.5013	88.7815	6.49113	11.9659	7.72398	13.2675	14.0134
Brf	6.5	8.7	3R	3.53502	3.67051	0.824593	1.30787	2.31867	1.07705	12.3304	11.5138	15.3576	18.5229
Bruce	6.9	9.1	3R	9.69665	10.1682	7.34117	11.8811	14.3037	5.85801	32.8193	22.7776	32.972	33.1905
Bsg	4.8	6.7	2L	4.6587	4.52322	23.1273	34.0907	10.9898	1.25423	505.392	515.115	421.855	530.508
Bsg25A	5.3	7.2	2L	0.171852	0.00599009	0.00110048	0	0	0	0.225257	0	3.61872	0.774614
Bsg25D	6.3	8.4	2L	12.0471	3.59864	6.70034	10.5721	28.6353	1.51173	11.8847	8.86781	23.4729	27.2599
BtbVII	6.2	4.1	3L	18.1916	8.80851	16.4155	25.0066	35.9584	11.5297	26.2695	18.4845	41.5357	33.5511
Btd	6.3	4.7	X	0.397373	0.142469	0	0.0489446	0.0181263	0.0317992	527.763	473.782	0	0.07772
Bteb2	5.7	4.4	X	0.0177855	0.099734	0	0	0	0	0.697889	2.13779	0	0.078291
Btk29A	4.6	6.7	2L	2.13213	0.521783	0.504906	0.706655	5.43193	0.170606	31.3516	27.2276	61.4157	61.6496
Bub1	6.3	8.4	2L	12.0462	6.9785	6.12327	9.35494	38.2627	19.7785	18.6053	11.2755	13.7356	13.2559
Bub3	7.1	9.8	U	30.1697	5.19095	2.83381	4.61785	43.465	17.3956	22.2827	9.95424	15.6833	16.4406
BubR1	6.5	4.7	X	8.47609	1.14006	0.470421	0.614362	27.0848	2.31612	6.92717	1.02283	1.77329	1.95225
Buffy	6.5	4.7	2L	0.41565	1.52153	0.324463	0.81131	0.214785	0.572864	39.5986	32.3699	9.30822	12.3018
Bx	6.3	4.7	X	0.580519	0.275082	1.4973	2.22886	0.761693	0.332064	12.6029	12.9402	27.72	30.6084
Bx42	6.2	4.8	X	25.9568	9.46524	9.56342	12.9374	47.4414	12.8403	20.1072	13.8996	29.2246	24.9664
Bzd	6.5	4.4	X	9.80041	3.18057	1.9057	2.46292	13.1364	2.13361	29.3914	30.0591	24.9393	29.7952
C15	6.5	8.9	3R	0.00808224	0.100173	0.0488142	0.0604237	0	0.0732654	0.339756	0.27425	0.328781	0.142914
C1GalTA	6.4	8.9	2L	5.68515	2.01053	3.5466	4.3606	9.91437	1.72989	63.4872	60.7252	80.7074	87.1721
C3G	6.2	5	X	2.58191	2.51271	4.4505	6.26616	5.04928	0.96033	35.2598	28.6865	68.6953	77.7304
C901	6	4.6	X	0.0138083	0.0429671	0.192846	0.412612	0	0	0.605811	2.11044	5.20396	15.1112
CAH1	5.9	7.7	2L	6.86715	20.2957	15.6252	18.2514	0.154074	4.711	476.372	276.578	607.679	943.374
CAHbeta	7	9.2	3R	6.27027	4.18913	3.64203	6.18872	9.75254	0.0695772	68.546	98.8	54.094	70.165
CAP	6.4	8.8	2R	1.16148	5.93512	8.00616	9.68087	0.632008	0.805133	195.93	186.566	126.479	128.988
CAP-D2	6.5	9.5	2R	10.5581	0.671925	0.433828	0.680005	19.3088	0.789257	9.73654	5.68933	14.2974	16.0032
CASK	6.1	8.3	3R	2.39992	2.04171	24.6024	39.8938	4.26605	0.220538	26.5784	19.8073	85.85	84.6538
CBP	6.4	4.2	X	7.20463	0.154973	0.56937	0.573514	57.6013	1.19198	5.88532	2.66312	7.1408	6.75064
CCHa1r	6.3	9.2	2R	0.0513415	0.436252	0.275092	0.333885	0.010498	0.040614	5.44391	2.23514	21.3208	14.8502
CCHa2r	6.6	8.8	2R	0.00970019	3.10827	0.0713143	0.0588242	0.000933492	0.205465	0.611571	0.472034	3.76639	3.90192
CCS	6.8	9.2	2R	7.30731	5.87089	5.41547	9.34911	17.4012	5.28533	56.5831	47.2264	81.4244	102.727
CD98hc	6.8	9.3	3R	39.4427	15.2837	23.9383	38.1617	66.6831	14.2942	233.151	196.469	150.161	187.875
CDC45L	6.3	4.8	X	28.6151	2.48434	3.68281	2.66513	55.8	2.12793	8.97124	4.78116	2.98845	3.47996
CDase	5.1	8	3R	1.52154	4.1798	3.16781	5.40048	0.0334532	1.23286	262.759	272.543	47.2531	61.7258
CG10005	6.2	9.3	3R	0.235435	0.189803	0.0107575	0.2402	2.92206	1.44591	54.6784	30.6198	55.116	38.2831
CG10006	6.9	4.3	3L	0.873036	2.30087	0.718417	1.55452	0.0155862	2.43188	49.107	47.4223	42.2388	41.7825
CG10011	6.3	8.7	3R	0.833718	1.34202	3.64656	5.18061	1.53941	0.438672	6.54867	5.77967	30.8354	32.9892
CG10014	6.1	7.6	3R	0.0290102	25.0326	0.0196555	0.0661154	0	163.372	0	0	0	0
CG10019	5.6	7.6	2L	0.0203814	0.110656	0.368188	0.463728	0.0222425	0.0419616	3.34037	2.55948	13.2474	12.3417
CG10026	6.7	9.6	2L	0.568282	2.28502	2.55981	5.84515	0.125065	9.24526	155.447	83.0868	100.6	75.804
CG10038	6.3	8.5	3R	8.69544	3.48247	1.03428	1.28911	7.83135	4.91586	88.6458	97.3752	154.776	189.577
CG10050	6.8	9	3R	3.07909	1.01236	0.414321	0.70641	4.97617	0.489602	1.39642	0.16752	2.86446	2.75133
CG10055	6.2	4.4	3R	20.8974	19.6672	11.6288	21.4952	69.8954	101.425	5447.78	3491.07	38493.9	15278.4
CG10062	7.1	9.2	2R	1.20401	2.90341	0.343239	1.06004	0.189842	7.07572	35.2661	37.1205	18.7469	22.3837
CG10064	10	7.4	3L	0.071381	46.4198	0.105478	0.0224647	0.00619843	147.483	0.252583	0.316828	0.904562	0.817797
CG10068	6.8	8.6	3R	7.37581	4.21886	5.51417	7.56398	13.5435	2.36319	22.2967	20.5189	22.5587	31.5331
CG10075	6.5	4.7	3L	11.8455	12.1378	5.74329	9.31353	13.3917	43.724	147.429	131.155	64.6307	54.1107
CG10077	6.2	4.6	3L	32.2496	64.0091	195.777	254.614	67.7066	72.8863	149.482	170.196	361.02	410.705
CG10082	5.9	7.7	2R	4.61974	6.54064	13.6634	21.0574	9.74322	3.46803	53.2224	49.9447	145.492	118.453
CG10083	6.6	5.1	3L	19.3956	4.5484	7.90227	15.2244	70.4796	10.4732	28.7146	18.9819	36.8868	36.043
CG10089	6.4	4.6	3L	0.425395	7.80422	2.88022	5.5304	0.0861455	19.3122	9.20419	8.19019	46.0213	38.2004
CG10092	5.9	8.2	3R	7.72878	4.76404	2.32981	2.3967	7.93423	1.13594	12.5741	10.1704	19.546	21.8565
CG10096	6.9	9.6	3R	1.99017	79.7276	0.0233578	0.342735	0.0879271	4.46599	32.5306	38.7088	158.72	213.783
CG10098	6.8	8.6	3R	11.3849	5.04239	4.48549	6.10341	12.6945	6.19484	23.4635	19.3922	40.226	66.6569
CG10103	6.6	4.4	3L	11.6214	7.90113	33.4591	39.9232	46.5994	23.8998	65.8444	60.8779	64.5062	63.7416
CG10107	6.6	4.6	3L	12.7916	17.0554	6.40026	10.2276	20.68	36.3429	16.4505	11.794	17.1062	9.56233
CG10126	5.9	8.1	3R	0.988174	11.9772	5.96392	7.4675	0.453562	34.0239	12.2218	20.3551	49.4902	63.9796
CG10132	6.4	8.9	2L	0.694403	3.68781	5.00732	9.54042	0.0477106	0.556146	15.6263	16.8213	61.3605	63.9069
CG10137	6.7	9.4	2L	1.66302	3.31198	3.46128	5.52537	0.0787628	0.796917	11.1357	10.8621	83.3662	70.6703
CG10144	6.1	4.3	3L	8.24879	6.05699	1.01239	1.62581	10.3393	11.4307	6.20157	4.406	9.68361	9.16376
CG10147	6.1	4.3	3L	3.12937	1.05923	4.37178	4.58514	8.94696	0.124975	4.73713	3.23883	2.79834	4.95565
CG10151	6.2	4.7	2R	0.802268	3.02705	2.62568	4.85067	0.627096	20.6554	8.105	10.3641	25.1769	28.8831
CG10153	6.7	9	2R	21.4521	32.9301	11.8934	9.09555	13.535	5.5636	80.2378	66.4657	46.8068	63.1013
CG10158	6.9	8.1	2L	14.0645	28.3265	7.09859	8.60357	41.1359	141.684	45.3418	35.9803	39.9044	54.4308
CG10166	6	9.3	2L	17.0862	11.5515	6.63546	11.9372	18.4444	12.3465	68.5033	50.9311	69.4664	71.901
CG10171	6.6	4.3	3L	8.19134	22.3095	1.91671	3.40082	11.2723	21.9874	34.7005	28.1615	65.7802	61.9455
CG10175	6.1	8.6	3R	0.29332	1.49503	1.31092	1.57096	0.0787255	2.46068	16.7478	16.6623	17.6605	15.2051
CG10178	6.8	8.1	2L	2.36074	4.10716	3.40636	5.43038	2.06493	0.117151	38.8695	43.3909	17.6722	17.0532
CG10184	6.8	8.9	3R	3.72922	2.38661	2.61365	16.2306	5.81862	9.49334	9.89878	3.8233	0	0
CG10185	6.6	9.4	3R	0.191279	1.7305	0.279753	0.563756	0	1.26699	0.32746	0.564583	1.21531	1.62616
CG10186	6.4	8.9	2L	5.13787	16.2043	41.3771	69.7758	0.0152148	0.176731	9.49972	12.0171	76.7428	79.8587
CG10188	6.7	9.6	2L	9.55655	2.35086	9.5305	17.2432	30.0146	1.46762	14.1111	9.82658	17.2544	19.9118
CG10189	6.8	9.6	2L	3.02117	3.04047	2.29149	2.40185	2.64504	4.89085	131.049	95.6636	88.5113	114.058
CG10209	5.8	8.4	2R	9.54976	2.91867	2.61037	4.21767	8.82281	2.92568	39.7793	35.0186	38.5925	30.88
CG1021	5.2	7.4	3R	4.02474	3.21577	7.75487	8.93195	7.44756	0.765253	23.8377	18.8949	56.6435	51.8196
CG10211	6	8.5	2L	0.316407	1.02807	1.97691	3.36223	0.0470341	0.984106	8.7498	5.8027	12.3285	8.76038
CG10214	6.3	8.6	U	20.4367	10.2164	8.20385	11.8207	54.9068	9.04722	70.1337	56.106	35.7831	43.0367
CG10217	6.2	4.8	3R	22.0319	8.41253	4.9389	6.78555	24.2289	8.77798	27.6664	19.5805	39.0462	41.614
CG10222	6.6	4.6	3L	9.04123	2.1835	1.6988	1.80591	13.1952	3.16647	30.773	13.4183	16.4043	18.5543
CG10226	6.4	4.5	3L	1.02676	3.10519	7.16117	14.0615	0.119792	2.31046	9.0256	9.25373	16.1646	17.5577
CG10237	6.3	9.4	2L	18.2031	8.14579	5.30555	13.7921	25.0942	0.468239	129.179	121.821	148.339	166.201
CG10249	6.6	9	2R	0.742687	4.93758	1.64843	1.91002	0.265817	17.1121	49.449	38.5706	36.6001	35.4518
CG10252	6.8	9.3	U	0.0402469	263.186	0.0217418	0.247601	0.0136284	4856.96	11.4069	32.3336	0	0
CG10253	6.4	8.4	2R	0.761826	12.4634	0.975636	2.18682	0.00665953	8.77887	41.607	25.41	99.6728	94.3558
CG10254	6.7	9.5	3R	77.5901	32.714	3.09972	5.73537	98.7361	42.6833	11.8583	7.04559	20.5364	22.2516
CG10257	5.8	8.3	2R	0.213725	1.01815	3.11086	3.72045	0	0.00245164	3.13805	3.68562	16.5949	19.2322
CG10274	6.4	4.6	3L	6.9083	2.31747	2.08766	2.93672	10.5651	1.61081	29.046	22.9162	32.5737	34.4282
CG10277	6.7	9.1	3R	10.677	12.2531	15.2204	21.3048	21.9848	28.6611	73.5869	68.4405	129.971	139.99
CG10280	7.8	9.6	3R	0.250073	0.0152297	0	0	0	0.0793621	0	0.304819	0	0
CG10283	6.4	7.9	2L	1.04287	0.541636	2.05548	3.39187	1.44087	0.376249	26.6516	11.6247	39.8359	34.3264
CG10286	6.9	9.7	U	14.4928	2.97685	5.23508	6.17593	21.5789	8.47733	44.438	30.8164	34.753	44.3688
CG10289	6.1	4.7	3L	10.5791	4.62569	12.0969	14.3479	22.5743	2.0348	27.734	16.2614	33.9576	31.5221
CG10298	6.8	9.2	3R	0.104637	28.9038	0	0	0	47.7194	8.21145	8.25808	9.12406	12.3155
CG10306	6	8.8	2R	85.88	60.8419	71.8976	65.4283	129.58	182.482	283.685	225.265	173.669	261.86
CG10311	6.4	7.3	3R	1.06872	4.2263	2.6055	4.30753	0.0541621	0.267065	780.251	1159.97	933.771	964.362
CG10321	21	23	2R	17.5227	7.76813	14.0314	21.0519	47.9712	15.0052	16.5567	10.0965	21.1798	15.4185
CG10324	6.4	7.9	3R	4.70383	1.45603	3.93311	5.16733	12.9701	1.23118	30.967	21.6624	33.2537	39.962
CG10333	6.6	9.2	2L	9.57027	4.58434	14.6114	20.5504	27.0142	8.95832	31.7937	28.9773	34.8576	31.3835
CG10336	6.1	9.1	2L	14.6596	1.25536	0.766503	1.00606	36.0734	4.81868	18.9358	14.482	17.3919	22.9702
CG10338	6.1	8.4	2L	5.56469	3.22323	2.24336	3.55934	8.3537	3.18393	6.1208	4.25458	18.3974	17.494
CG10339	6.2	7.5	2R	0.0644016	0.362291	1.39708	3.67206	0.028964	0	0.574203	1.21339	3.38121	4.41636
CG10340	6.9	9.6	3R	26.6419	27.4717	11.708	16.9281	19.8468	48.1619	605.311	632.293	283.662	272.654
CG10341	6.2	7.8	2L	12.8056	5.0465	23.7647	27.1079	24.6582	11.955	10.8901	5.66216	5.71024	4.53421
CG10343	5.8	9.5	2L	14.9178	10.7158	8.02895	10.6352	40.6971	48.9616	69.4938	56.313	37.511	37.4417
CG10344	7.3	10	2R	7.88607	7.15735	1.14144	2.77422	44.7523	32.9402	2.27672	2.66051	0.368368	0.646777
CG10347	6.3	4.7	X	8.45583	10.1306	1.51263	3.24248	6.71119	24.7549	27.172	20.1477	28.6212	33.9174
CG10348	9.4	12	2L	0.0293764	0.456503	0.229391	0.478054	0	1.09272	6.14052	4.8971	10.4	6.82434
CG10353	5.7	4.7	X	3.99406	5.30101	7.78482	8.88212	5.81098	1.69429	71.6041	54.4745	94.6448	101.167
CG10357	6.3	4.5	3L	0.0456941	0.266982	0.0292811	0.432063	0.0235792	0	15.1189	19.2051	99.9388	132.623
CG10359	6.3	4.5	3L	0.304171	1.41342	0.521561	0.607676	0.055087	0.364495	94.6711	41.3451	62.8932	47.4053
CG10361	6.6	8.6	3L	2.07328	2.85249	6.29311	7.15703	0.0169551	1.97975	194.504	186.04	118.844	123.575
CG10362	5.9	3.9	X	0.26835	1.63928	8.90741	12.3611	0.00744481	0.171281	7.7342	7.42471	43.4283	45.6872
CG10365	6.2	8.1	3R	3.08847	14.9796	2.65213	2.32389	2.34096	77.6799	79.1901	48.2014	25.415	53.3411
CG10366	6.1	9.4	2L	9.99992	6.71136	5.40307	6.65111	25.5761	11.676	18.6671	13.2776	21.7977	21.5013
CG10375	6.6	9.2	3R	11.0288	6.50987	11.8347	12.8425	27.8243	35.753	33.751	32.1952	29.3355	34.7605
CG10376	6.2	7.8	2L	8.57305	3.62523	13.6297	15.9885	36.1246	5.43289	21.6382	13.8811	29.863	35.1897
CG10383	6.1	9.1	2L	5.99734	10.6763	2.82776	3.69173	9.71567	16.3038	70.4226	79.9016	118.61	160.301
CG10384	5.3	6.4	2R	0.122055	0.948307	2.74274	4.35535	0	0.00729363	6.03577	6.40174	100.065	99.0011
CG10395	6.4	8.3	2R	6.37921	0.710663	6.07775	6.70881	44.8844	1.15376	93.3817	109.938	118.757	129.598
CG10396	6.6	9.3	2R	0.121981	69.0083	0.0118644	0.113278	0.128608	387.087	0.794283	0.807804	3.90651	4.10301
CG10399	6.1	9.9	2L	5.12623	3.964	1.68199	1.73171	2.63604	0.625767	83.9267	116.156	42.476	54.2791
CG1041	5.9	8.8	3R	7.34788	6.9012	4.78677	9.78192	9.28629	2.72833	61.9276	54.3982	39.5536	39.4179
CG10413	6.6	9.2	2L	10.9381	7.55773	3.06487	7.38698	18.5767	8.2603	32.2771	26.5915	49.5581	58.8929
CG10417	6.7	8.1	2R	24.1316	4.3601	20.4356	34.1102	170.129	11.5182	34.563	23.2614	66.7312	58.5894
CG10418	6.1	4.7	3L	18.9294	10.1635	2.84406	5.42672	17.5078	12.5936	76.5413	45.9051	31.1379	32.2255
CG10420	6	8.2	3R	9.80982	3.42092	2.01497	4.55467	15.5202	4.13753	20.6348	16.4024	10.717	16.8472
CG10424	6.2	4.3	X	12.4364	7.76531	2.83271	3.61219	14.0154	6.32818	41.9096	36.4568	80.1716	113.804
CG10425	6.3	8.9	3R	11.5089	6.6391	2.67608	3.18131	16.0474	10.2427	29.1283	23.1515	28.8187	34.5161
CG10426	6.5	4.8	3L	2.58651	4.54953	2.72006	3.97435	2.52051	4.09291	7.93818	9.53041	31.3809	32.4355
CG10428	6.1	9.1	2L	10.1288	3.76396	3.09766	5.11226	16.074	8.16491	6.15898	4.36017	5.71101	5.13577
CG10431	6.2	8.8	2L	2.66815	1.71489	0.58406	0.765257	5.47832	2.95732	5.44928	3.02611	4.90045	6.75936
CG10435	7	9.2	3R	9.93543	5.97955	5.97285	7.33313	22.7213	13.4118	24.3738	22.6606	29.335	34.6327
CG10440	6.6	8.5	2R	0.0284366	0.805605	0.750674	1.86103	0.00638942	10.9109	2.36177	4.29476	22.5367	23.5156
CG10444	6	8.1	2R	13.3541	6.19276	5.00198	9.42472	17.5045	22.2107	22.0568	21.0141	12.5843	16.913
CG10462	6.2	9.3	2L	10.9012	2.44642	4.16319	4.53904	45.4672	0.984588	9.28125	8.01476	7.75302	6.86829
CG10463	6.8	5.8	2L	6.30043	1.7207	1.52294	1.90134	12.8564	1.99107	49.6624	37.3381	31.7503	34.6549
CG10465	6.4	8	2R	24.356	9.29588	12.8201	23.3013	83.8862	11.571	117.277	122.746	117.827	158.79
CG10466	6.5	9.6	3L	4.86721	3.67238	0.187692	0.2311	0.390988	1.35272	92.8051	59.7809	114.621	108.618
CG10467	6.5	4.3	3L	10.6756	13.5257	2.02784	2.90147	3.99079	2.17468	26.397	24.1855	10.0157	12.9197
CG10470	5.2	8	U	23.0302	17.476	23.7385	25.7355	66.5992	91.9364	173.26	128.291	139.051	188.33
CG10472	6.6	4.1	3L	110.61	236.726	0.371963	0.53637	0.0215543	171.929	14251.4	16867.1	17.9321	12.5938
CG10483	87	93	3L	0.372769	4.49632	3.41398	5.62208	0.0442384	1.97607	8.48975	7.70227	34.5444	29.2411
CG10486	6.2	7.8	3L	0	0.978863	0.00688933	0.0823768	0	3.12376	1.2334	1.12358	0.0822	0.187993
CG10492	6.3	8.9	2L	28.6666	14.5996	9.94235	14.4908	70.3994	42.539	15.173	9.97376	25.1998	23.7782
CG10495	6.8	8.9	2L	7.78155	1.83463	0.907106	1.85854	9.24936	4.21492	21.146	15.0558	27.0537	31.3826
CG10508	7	10	3L	0.363171	2.23576	15.9206	22.0495	0.0398556	7.70155	7.31311	6.51867	25.8764	28.8312
CG10512	7	10	3L	2.32887	6.04967	2.8064	6.05695	0.223922	3.3673	97.152	95.6189	36.0109	36.5458
CG10514	6.6	9.7	3R	16.0889	48.1927	5.95428	6.77917	0.751992	40.2908	13.4777	14.4719	3.43555	3.93712
CG10516	6.7	4.5	3L	4.8076	8.10719	3.46853	14.1498	2.81598	14.1477	99.6504	94.0139	80.3017	68.4061
CG10527	6.5	8.4	2R	26.4511	33.2841	5.83056	9.87786	11.0224	8.80776	289.26	260.389	301.985	376.629
CG10543	6.4	8.3	2R	5.99139	3.98056	6.85027	9.08482	12.9181	2.21845	30.3331	34.6283	53.8144	38.7405
CG10550	6.4	9.5	3R	9.70668	19.7026	75.0851	115.828	0.451254	1.95528	57.8835	66.5726	73.6304	85.338
CG10560	6.4	9.5	3R	3.33137	9.43336	17.7739	21.8905	0.0528867	8.66932	63.4655	71.0402	61.4299	100.269
CG10561	6.7	8.6	2L	4.79786	36.8766	7.1362	12.4664	9.25988	185.595	173.931	188.456	125.147	141.737
CG10562	6.4	9.5	3R	3.06974	6.28971	6.76589	10.2882	0.127807	0.428766	94.7243	117.974	132.899	209.63
CG10565	6.7	4.9	3L	42.9382	26.2802	22.5588	25.6157	100.448	108.505	42.178	30.6065	55.7533	54.8493
CG10566	6.7	4.9	3L	0.782145	5.80182	4.12969	7.4637	0.028377	12.1759	30.903	28.6583	54.2908	46.0828
CG10576	6.5	4.9	3L	99.58	29.968	18.4159	15.6809	116.689	90.5979	317.095	176.389	220.569	198.439
CG10584	6.5	4.5	3L	8.31339	5.72103	1.50088	2.30117	9.48528	5.39126	26.9828	27.1131	30.225	32.821
CG10585	6.5	4.5	3L	9.64734	6.39691	3.02191	6.20796	12.6934	7.27566	27.2158	18.8738	20.0897	21.2897
CG10589	6.8	4.1	3L	0.216564	37.9483	0.0115746	0.0735413	0.010883	81.4258	0	0	0	0.221195
CG10590	6.4	4.5	3L	18.1638	16.8752	3.87606	4.95752	15.9394	23.1826	62.8775	46.7784	80.8417	87.8568
CG10600	6.5	8.4	2L	11.0516	14.5671	21.3588	26.2534	60.4537	53.952	28.8409	25.7412	37.5143	32.1156
CG10602	6.6	8.7	2L	32.3532	12.6024	7.64478	11.0526	50.746	18.7506	143.254	145.811	63.303	63.6729
CG10616	6.9	4.7	3L	12.009	34.2632	3.17607	4.84908	17.601	102.874	37.882	34.9398	57.3757	58.8305
CG10621	6.3	8.3	U	10.0651	8.48891	19.6092	23.6596	0.394624	0.920788	306.681	214.063	125.552	99.1666
CG10625	6.7	4.8	3L	0.187092	0.159564	0.364544	0.841007	0.107069	0.0497473	80.628	11.8259	13.3047	3.30252
CG10628	6.8	5.8	2L	7.01059	3.50687	1.30825	1.90723	5.78838	4.26029	39.1921	39.5764	31.2946	37.2939
CG10631	6.5	9.8	2L	5.53497	3.27381	4.37088	7.40243	9.19997	1.71704	5.87328	5.23073	24.638	22.594
CG10635	6.9	4.5	3L	42.5826	20.2464	17.4134	22.5439	65.8229	61.4988	215.593	170.966	128.941	131.295
CG10638	6.6	4.7	3L	9.85413	4.48509	1.40745	3.69983	12.8046	5.3968	265.646	222.597	159.803	192.613
CG10639	6.2	8.8	2L	6.97173	17.0201	9.9497	10.3048	6.24849	29.6118	78.7271	66.6095	57.6793	66.8293
CG10641	5.7	7.9	2L	3.22324	1.74011	4.83474	7.71641	4.47161	0.910132	88.0122	84.9188	230.36	306.011
CG10646	6.8	4.8	3L	6.36085	3.08702	1.46148	2.09383	6.32491	2.65235	147.763	125.385	169.801	168.17
CG10657	6.7	4.5	3L	0.432638	8.60343	0.815137	1.82289	0.00451234	0.646889	9.82409	7.77396	7.41232	7.13713
CG10660	6.5	6.1	U	1.31401	7.92942	1.0472	2.43843	0.27202	14.4582	65.7088	64.7378	61.6453	92.7609
CG10663	6.9	4.7	3L	0.105422	0.457894	0.249957	0.195664	0.0242002	0.159929	18.4636	17.1999	28.7658	34.411
CG10671	7	5.5	3L	14.5404	19.3242	8.27696	9.34229	25.9905	11.7815	77.6047	93.8525	60.8906	99.654
CG10672	6.8	4.6	3L	18.5923	20.5653	16.3846	22.7472	19.1741	12.0939	148.058	226.374	109.028	114.386
CG10673	6.8	4.6	3L	10.8826	8.55178	5.1372	5.32684	12.492	17.1179	51.0319	46.4499	53.1105	43.2864
CG10674	6.8	4.6	3L	25.1941	18.41	5.4316	7.5021	16.0451	10.7323	160.344	120.76	112.812	94.1779
CG10681	6.8	4.8	3L	3.29874	3.28973	0.459672	1.60397	4.38271	3.4383	37.1367	28.1305	55.841	70.7919
CG10688	6.6	4.7	3L	20.906	14.1094	6.88114	6.75269	14.5854	7.77777	138.155	102.369	116.76	95.3742
CG10703	7	10	3R	15.6606	8.88227	12.3328	19.7209	31.4521	23.6841	24.6873	19.5963	26.3824	33.3997
CG10710	6.1	4.3	3L	0.16047	0.956043	0.57625	0.831873	0.00509038	0.0638653	12.3927	10.0896	15.1239	11.1395
CG10713	6	4.7	3L	0.067362	0.469544	2.47334	3.56375	0.00514911	0.751842	3.24649	3.84868	37.0791	30.4872
CG10721	6.2	8.8	2L	4.47108	7.02921	2.11484	3.28371	3.82286	8.60803	83.6147	64.7387	100.164	115.372
CG10732	6.6	5	3L	5.32022	21.7404	8.51193	10.2399	16.3805	57.3474	42.9691	35.5356	34.2451	26.2573
CG10737	5.9	9.9	2R	4.47321	16.3421	11.4637	16.3544	4.82243	1.87581	87.4173	86.6265	78.8132	80.5447
CG10738	6.4	4.6	3L	1.11001	1.17355	0.143342	0.236288	0.8546	0.0231513	0.806994	0.418145	2.47129	2.48238
CG1074	6.4	9	3R	12.9507	5.30097	1.10815	1.76596	13.2595	6.68355	24.1638	23.1134	34.4276	37.4622
CG10754	6.7	4.7	3L	18.9966	8.37265	6.25202	6.0528	27.0385	24.2234	60.0116	41.1645	55.8486	68.0775
CG10777	6.2	4.3	X	18.1731	6.67891	8.8854	14.9693	53.6572	11.2089	84.5192	59.6553	234.277	234.814
CG10778	5.2	8.9	U	11.3477	4.54232	0.642418	2.3489	7.62396	3.58327	58.1634	34.1152	58.7356	70.0143
CG10793	6	4.4	X	0.0783805	5.82751	0	0	0.0503472	12.1162	0.462465	0.361712	2.01001	1.70942
CG10795	6.6	8.8	2R	15.1416	6.29915	12.4927	18.1683	47.7298	13.6748	141.585	177.881	125.822	190.386
CG10802	6.7	4.7	X	13.9039	9.51234	4.25065	8.17892	16.6454	6.0941	59.8397	47.9278	24.3615	29.9621
CG10804	5.9	4	U	0.192521	1.03551	14.9493	20.6615	0.0159972	0.00659027	2.47829	2.84718	50.6276	45.7734
CG10809	5.9	4.7	3L	8.47533	9.11985	4.92313	4.8415	15.2638	18.9596	35.2166	21.5249	90.366	75.521
CG10830	5.9	6.6	3R	0.877288	4.31855	31.7233	50.8161	0.232603	0.44433	3.72546	5.87742	71.2695	89.4747
CG10839	6.2	4.6	X	0	4.81295	0	0	0	64.4096	0	0	0	0.764976
CG10841	6.6	8.8	3R	0.00286114	46.0585	0	0.00982503	0	98.2272	4.16278	2.83659	24.4951	22.2298
CG10863	6.6	4.7	3L	48.5682	69.2744	169.057	214.606	88.5345	129.283	91.2668	94.897	62.3372	47.255
CG10864	6	8	3R	0.250649	1.16822	0.346415	0.913896	0.0416441	0.0731559	12.3315	9.04031	14.8554	9.83778
CG10866	6.9	4.8	3L	7.09226	5.93414	6.67561	9.18773	24.66	23.2274	60.3965	46.6549	56.4781	53.9464
CG10869	6.1	8.9	2L	0.0502584	97.0232	0.0539576	0.256113	0.0276411	316.693	0	0	0.054985	0
CG10874	6.3	8.7	2L	10.0599	4.74241	14.0189	13.9949	41.586	10.993	28.4099	23.6335	31.8391	38.5708
CG10877	6.2	8.2	3R	5.80927	3.38826	0.442214	0.602773	8.91512	2.13575	12.4099	12.8005	12.5496	17.9161
CG10898	6.7	9	3R	12.4767	16.0823	0.967295	1.47185	4.00772	3.57009	56.8221	46.7045	143.109	158.583
CG1090	5.9	8	3R	0.402368	2.39156	13.169	26.9019	16.3821	6.77123	6.72257	8.59397	120.218	142.556
CG10903	6.7	9.1	3R	6.58724	2.87783	2.2538	1.7792	8.00533	5.25077	32.9405	16.9192	22.2293	19.4997
CG10904	5.9	9	2R	9.65758	3.26281	6.50124	11.3274	41.6605	12.4984	26.8215	15.8046	32.5718	41.5015
CG10907	6.4	4.7	3L	3.68481	4.25402	2.36867	2.92686	9.85011	4.95812	31.2746	23.4173	37.444	41.0048
CG1091	6.6	8.9	3R	16.8092	11.1891	5.85623	8.90142	38.7584	36.0148	38.6307	20.8202	43.498	39.3489
CG10914	6.5	9.1	2R	5.11352	1.80708	1.92901	2.03031	5.52388	3.42988	28.5948	22.8327	24.8091	25.3242
CG10915	6.5	9.1	2R	13.0603	5.29867	10.1594	15.7707	27.1507	2.19784	28.447	18.3906	33.8723	43.0728
CG10916	6.2	9	2R	4.90096	8.72022	6.17291	8.47682	3.37491	10.2676	140.878	146.699	155.645	168.537
CG1092	6.6	8.6	3R	1.21229	3.94526	5.69718	9.82905	1.36735	2.99876	71.9734	65.5742	32.2562	45.5921
CG10927	6.8	8.5	2R	3.48241	0.960164	0.88359	1.56015	6.80196	0.754115	93.4869	53.5882	108.5	72.9782
CG10932	6.7	4.9	X	48.8195	24.4301	9.3498	10.4691	23.1503	4.48204	474.817	577.122	308.842	398.902
CG10933	6.7	9	2R	0.132709	1.35594	1.28373	0.520995	0.0142714	6.08156	2.40698	1.86298	1.72808	2.34902
CG10936	5.9	8.1	2R	0.933933	0.459668	0.440074	0.458352	2.45798	1.18	57.194	53.6862	62.2638	52.5011
CG10947	5.2	6.6	2L	0.275155	4.47959	3.42999	5.10811	0.0123087	24.9354	24.7523	40.8727	30.6667	52.3536
CG10948	6.4	4.8	3L	3.68209	3.3178	10.7293	16.1847	11.2688	3.11201	7.54719	5.46153	27.2255	19.5843
CG10949	6.6	8.8	2L	6.84151	2.26101	5.46514	8.20887	20.3034	18.7279	14.4776	6.93967	9.87761	9.26083
CG10958	6.4	8.7	2R	0.995813	16.5247	1.71746	2.54101	0.969822	73.026	0.678182	0.36408	0.542739	0.809302
CG10959	6.5	4.4	X	7.96634	2.62865	1.48748	1.80494	21.1077	14.3712	84.2543	49.2468	151.527	112.684
CG10960	6.5	4.6	3L	8.27621	6.35131	3.16294	7.54296	8.17699	0.983623	176.776	130.744	81.5362	97.039
CG10962	15	8.6	X	9.36215	2.78879	18.7922	15.7217	11.2846	1.77705	139.639	99.1551	83.737	69.7308
CG10979	5.9	8.1	3R	17.64	3.38802	4.01019	6.06065	59.9389	10.2129	13.8354	8.12336	12.5034	13.2117
CG10984	6.6	4.4	3L	5.99282	5.60528	10.0143	15.0093	22.1947	15.1296	12.6418	6.8417	11.038	11.6803
CG10992	7	4.7	U	62.5768	77.058	34.4933	42.5624	29.8296	57.958	543.836	578.391	701.131	925.308
CG11000	6	8.7	3R	0.332453	1.75905	23.231	35.129	0.073296	0.584091	5.81334	6.54238	107.282	75.081
CG11007	5.3	8.1	2R	27.1797	12.5371	2.75132	5.44524	31.5709	86.4575	92.4976	84.1419	94.0568	104.468
CG11023	6.5	4.6	U	0.0246818	7.60888	136.533	141.766	15.3157	77.1286	51.1839	43.9644	76.2845	77.7993
CG11029	5.7	7.5	2L	1.29818	1.7508	0.0383781	0.169819	0.0742325	0.0630408	42.9955	23.7231	44.6219	20.1826
CG1103	6.8	8.6	3R	11.9184	3.25882	3.65845	3.88181	27.9279	9.12418	8.78683	7.35015	7.63659	10.9345
CG11030	5.4	7.7	2L	1.73089	3.68769	0.730069	1.19473	1.97171	1.53771	21.05	9.94079	25.6013	26.333
CG11034	6.5	8.4	2L	0.912318	0.802127	0.633327	1.4591	10.3388	7.62304	182.278	267.288	5.44078	3.97421
CG11035	6.7	9.1	3R	7.13472	11.306	5.75909	9.34056	8.7458	18.5498	184.185	232.408	81.2769	100.391
CG1104	11	12	3R	7.53951	12.8342	7.77635	8.76669	6.00168	21.5429	30.5499	20.6825	30.3326	38.8392
CG11041	6.5	8.8	2R	0.019574	0.237975	0	0.10928	0	0.0434845	6.04444	3.28969	5.07537	11.4885
CG11044	6.5	8.9	2R	0.502695	3.1749	0.460247	0.360959	0	0.0700926	146.684	171.441	93.9486	109.393
CG1105	6.4	8.6	3R	5.53578	6.3255	4.17693	6.32945	9.03842	12.5742	55.9599	42.9365	33.7322	35.3155
CG11050	4.9	7	2L	11.7744	8.19777	12.1207	12.8008	15.7957	1.05509	221.655	245.041	989.841	1069.01
CG11055	6.8	9.1	2R	25.4024	10.7307	4.51785	6.59116	24.5621	6.77884	13.6538	8.8326	20.4865	27.2854
CG11069	5.9	8.4	3R	1.02243	1.0812	0.721404	0.863824	0.25989	0.0775782	42.5702	34.7859	63.9719	64.081
CG11070	6.6	8.4	U	16.2657	13.7251	4.21707	7.44278	29.5778	27.1269	28.6795	27.7895	33.1435	41.0277
CG11071	5.6	4.5	X	0.737483	1.44844	4.06565	5.47912	0.807827	0.850338	7.00336	9.29907	19.1318	13.6351
CG11073	6.7	4.7	U	2.44987	11.0844	132.955	131.914	0.0749149	0.365425	1744.01	2047.22	238.115	357.192
CG11085	6	4.5	X	0.00879385	0.0318191	0.0872907	0.30092	0	0	0.304271	0.796437	5.76408	7.38847
CG11089	5.7	8.3	3R	22.3005	5.46738	12.1557	21.3101	11.3688	4.01611	511.624	482.327	297.458	258.984
CG1109	6.5	9.2	3R	13.2752	5.18375	3.20279	4.23467	23.5418	16.7211	29.9228	23.2229	33.0697	38.8629
CG11092	6.3	8.7	X	23.5587	4.29047	3.11062	3.32489	63.5253	8.55003	5.87093	2.91744	3.46463	3.7585
CG11093	7.2	5.1	4	0.241094	0.223241	8.47324	0.424561	2.84785	0.00751243	0.268959	0.094765	0.151719	0.323062
CG11095	6.1	4.3	X	6.82041	4.20966	3.56807	3.70572	11.546	0.661471	33.0477	39.2782	13.1673	23.4492
CG11099	6.5	8.9	2R	0.742524	4.17356	16.9076	28.5484	0.00271984	0.00699612	20.1637	22.8074	6.28693	7.12119
CG11103	7	4.7	U	7.41331	4.72039	3.11064	4.15496	6.11024	1.32821	123.856	108.911	161.769	147.451
CG11109	6.2	4.6	3L	10.1637	6.15614	4.57277	4.69532	18.3875	9.09879	23.1775	16.7298	20.469	20.6538
CG11110	6.7	9.4	2R	13.2225	23.1659	7.76468	11.4809	19.7056	105.338	113.196	67.5875	70.781	75.5385
CG11122	6.4	4.6	X	6.79041	5.35417	5.90262	10.5427	14.0932	9.36522	5.85554	3.94261	12.2074	8.9748
CG11123	6.5	9.5	2R	13.0058	4.35034	5.7718	8.4448	20.5414	7.44186	25.427	17.3962	18.7785	23.6111
CG11127	6.6	9.1	2R	10.6948	6.68033	4.34596	6.7286	10.1092	7.99346	22.3985	13.4098	18.1822	29.7229
CG1113	6.2	8.6	3R	3.38318	4.83469	0.0876622	0.498111	0.0163196	0.133491	0	0.209296	1.23814	0.881374
CG11134	6.1	8.4	X	15.2643	11.1073	8.24002	5.15487	11.8574	17.3761	50.4874	30.6509	61.1512	67.1055
CG11137	6.2	4.6	3L	37.8126	29.0367	4.70426	13.8152	20.2517	77.8668	95.5336	61.6071	52.3592	60.1541
CG11138	5.4	3.6	X	2.45	1.88671	9.37367	10.4907	3.09501	1.03682	127.484	114.167	454.394	291.875
CG11141	6.1	8.2	2R	7.60787	16.3753	2.1579	3.56843	12.2715	44.5299	11.8108	8.49114	27.7023	32.1593
CG11147	5.7	7.9	2L	3.56673	11.911	7.4292	16.8795	0.394251	0.506838	8.03981	12.9889	30.3812	29.8049
CG11148	7	4.7	4	14.9137	5.46681	20.6546	16.9975	72.0319	3.0313	63.6267	54.2461	79.317	78.622
CG11149	4.9	6.6	2L	0.749359	2.36597	0.00316334	0	0	0.0524711	139.392	104.849	12.127	17.9886
CG1115	6	8.6	3R	11.0264	9.18325	9.42244	11.8417	15.4714	18.9692	108.696	81.7539	83.7828	84.0607
CG11155	6	8.4	4	0.692819	1.57189	8.94129	16.255	2.39298	0.405961	25.2072	25.666	82.1948	110.814
CG11159	6.1	8.5	2R	0.014141	0.0256411	0.0225186	0	0	0	1020.3	1284.36	462.409	533.617
CG1116	6.6	9.4	3R	13.6266	21.0386	1.59283	2.27453	5.03669	9.83492	31.0414	30.0085	77.6385	102.98
CG11160	5.8	3.7	X	0.501377	2.95855	0.648356	0.514796	0.0034219	0.13169	72.2783	65.0399	57.5235	47.3731
CG11163	6.8	9.1	2R	1.53866	1.62805	1.17873	1.70517	2.04751	0.638057	34.3148	33.5526	13.1034	10.9698
CG11178	7.1	5.1	X	7.89059	2.54364	2.10686	2.60741	10.3352	1.58513	21.9856	17.0583	33.1893	36.8619
CG11180	6.3	8.8	2R	12.0175	0.969127	5.57676	5.28779	47.4102	0.759684	31.4524	16.5963	21.0087	24.4843
CG11188	6.2	8.3	2L	14.2486	2.49711	6.32736	6.66138	39.0821	7.76945	21.4978	14.0993	15.1119	18.1263
CG11190	6.3	4.5	X	16.8581	10.7568	3.66718	8.13912	17.4696	18.3932	44.8538	29.885	30.7727	25.4498
CG11200	6.5	8.8	2R	4.57732	3.34001	6.63652	11.357	9.19308	5.73156	81.5212	64.7317	108.354	154.76
CG11203	5.8	4	X	0.154444	1.10917	2.49867	4.44063	0.0346091	0.000217725	4.21795	5.86435	59.442	54.2409
CG11208	6.5	8.9	2R	42.0093	15.0433	4.25371	6.59135	36.0237	7.56695	84.4509	80.3769	62.9571	69.7456
CG11210	6.1	8.5	2R	9.76029	7.51	5.5385	8.44349	15.0941	3.75542	48.1762	50.1886	83.9053	131.479
CG11221	5.5	8.3	2L	0.0722544	2.26735	0.701747	1.28907	0.0123204	0.0193062	17.3834	9.4563	33.4705	30.3053
CG11236	5.7	4.1	2L	5.59724	9.15084	10.3224	9.01113	0.00598523	0.531046	129.787	114.375	62.9748	59.335
CG1124	6.6	8.8	3R	3.65244	5.10307	8.40141	7.77872	0.233819	0.829712	55.4724	74.4484	83.1146	113.15
CG11241	6.1	4.1	3L	4.58562	2.82418	1.96044	3.44148	5.50745	0.670002	257.384	308.442	176.313	239.207
CG11242	6.9	9.5	2R	19.3792	9.64237	6.5023	10.4337	39.3025	30.2325	192.475	205.062	199.43	180.53
CG11247	6.6	4.4	3L	6.50033	5.63907	11.236	16.767	21.8432	5.20378	27.5004	24.5614	61.7816	83.558
CG11248	6.6	4.5	3L	6.93978	8.70083	3.47632	5.51644	15.3448	8.41599	12.4894	10.0504	23.4016	19.0349
CG11253	7	4.8	3L	0.516387	17.9358	0.0284459	0.00899997	0.131354	133.821	14.1825	7.54401	39.0046	24.1985
CG11255	6.5	4.7	3L	20.6192	10.4608	30.755	39.8436	30.4896	9.23821	609.345	664.489	211.215	181.004
CG11257	6.2	8.8	2R	2.34207	1.45363	1.80652	2.21528	4.1984	3.40208	56.2615	36.3957	79.3612	66.9845
CG1126	6.5	8.6	3R	0.14684	0.370884	2.3001	0.628479	0	0.63004	0.693057	0.854405	4.66642	4.26872
CG11266	6.4	7.8	2L	14.9533	17.6588	35.1937	56.4241	25.6188	4.349	29.9183	27.3091	47.1174	38.5299
CG11267	6.5	4.5	3L	122.5	22.8749	42.4471	52.9931	331.897	65.3182	2833.89	2332.95	1256.43	1613.76
CG11284	7	4.9	X	11.6385	3.08425	3.24645	4.2333	20.1855	1.14169	32.0245	28.2494	33.9535	45.9265
CG1129	6.5	8.6	3R	8.04586	7.15801	2.80117	5.2388	11.6375	5.3412	90.098	63.6875	42.5428	51.6625
CG11294	6.6	4.8	X	0.0858821	6.74242	1.45089	3.07844	0	39.5008	3.95812	3.69562	15.2639	17.1384
CG11306	6.8	4.6	3L	13.0887	9.25681	10.5394	16.6685	16.5062	13.2187	35.5256	29.4336	51.9287	61.5856
CG11309	6.2	4.4	3L	13.4404	17.6916	6.88535	12.2461	6.9726	4.65827	36.3078	21.8009	54.3944	54.4496
CG11317	5.8	9.5	3R	0.106193	0.687682	3.55673	4.96584	0.00250701	0.191052	4.13481	4.19533	48.4414	41.6526
CG11318	6.1	8.3	3R	0.576799	1.0596	0.0210858	0.109349	0	0.070425	1.66877	1.82264	0.242242	0.220493
CG11319	6	7.1	2L	0.11636	0.875047	4.02388	6.21115	0.00813721	0.174447	10.0225	11.6343	79.1643	87.2663
CG11320	4.9	6.4	2L	0.470218	0.0851934	0.0739924	0.0226616	0.00180985	0.00331672	0.327268	0.228279	0.892931	0.483604
CG11321	6.3	8.4	2L	1.0933	7.47439	7.1899	6.66523	0.0317491	0.0391525	32.4557	33.3129	16.523	11.0159
CG11334	6.1	8.8	3R	13.5355	8.35843	3.45373	4.36033	14.3329	11.644	45.7895	64.5373	119.826	183.326
CG11337	6.6	8.2	3R	7.09662	2.43966	1.43956	1.64603	11.8413	2.86814	12.9733	9.68522	9.42912	9.56835
CG11350	6.5	8.8	2R	0.0171096	0.0212156	0.172088	0.153089	0	0	0	0	0	0
CG11353	6.1	8.6	U	0.710679	0.390702	0.100763	0.109975	0.165118	0.0622246	81.5675	217.916	73.5771	128.825
CG11357	6.3	4.6	3L	4.48126	1.88419	2.01703	3.17824	7.72427	1.68436	13.3089	12.1132	21.0676	22.2916
CG1136	6.3	4.3	3L	0.151668	5.8221	0.989753	1.12328	0.0814584	0.322512	80.3463	96.0187	159.724	154.196
CG11360	6.9	4.9	4	3.29142	0.47341	1.06171	2.16967	1.99984	0.189352	29.6417	15.2385	118	95.5756
CG11367	6.1	4.1	3L	3.15826	6.92824	0.933163	1.33467	7.3225	12.214	26.6461	23.4329	55.8471	63.194
CG11370	6.4	4.5	3L	0.0192361	0.0301907	0.0250177	0.24827	0.0381154	0.0170718	0.30504	0	1.02216	2.83487
CG11376	6.4	8.5	2L	4.93331	2.01087	7.33212	9.74092	17.7719	0.415949	8.0709	5.948	12.263	14.8126
CG11377	7.1	8.3	2L	19.8609	8.65385	5.31416	7.78435	23.1496	4.615	45.1682	42.1741	56.2808	81.7249
CG11378	6.1	4.3	X	12.1235	15.1717	7.38144	15.4434	3.91904	17.8125	200.146	184.95	0	0
CG11380	6.8	4.2	X	0.0704959	0.0396864	0.142898	0.103372	0.0759945	0.00527306	5.78166	5.5133	3.04846	1.45927
CG11388	6.5	8.9	2R	4.91063	8.60043	31.1077	40.2188	5.03747	1.34843	26.3586	29.2475	89.3543	129.835
CG1139	6.6	4.4	3L	0.460178	1.24297	0.00664218	0.00284755	0	0.655606	26.7953	16.5077	15.9863	15.281
CG11396	6.5	4.6	3L	10.8498	4.79673	6.36742	9.02305	29.2672	17.0934	16.7606	16.4961	33.6132	29.3969
CG11399	6.5	4.6	3L	19.4669	2.3662	5.12174	7.1383	36.0038	0.872679	12.7194	10.5546	20.9471	17.9535
CG1140	6.5	4.6	3L	8.49224	9.68	3.16497	3.69758	2.69028	4.80622	503.107	403.212	345.362	324.689
CG11403	5.9	7.8	2L	8.5858	0.493209	21.0025	0.821521	25.2234	1.82308	1.62495	0.396784	0.187172	0.225309
CG11409	6.4	4.2	X	0.466061	0.431918	0.231876	0.332766	1.33187	0.22623	4.1629	3.61702	11.2037	7.21827
CG11412	6.6	4.6	X	25.8249	11.1455	22.6748	26.6981	72.3181	20.5058	36.506	23.8668	29.704	35.9728
CG11414	6.5	8.8	2R	18.5698	19.2343	12.3228	17.702	46.9135	44.5729	31.8018	21.6245	27.9451	32.7245
CG11417	6.6	4.6	X	25.9003	3.12678	6.56231	8.9361	65.1634	10.0505	10.5221	7.03039	11.3749	12.3952
CG11418	6.6	4.6	X	7.32987	7.1662	0.948998	1.21802	8.29632	15.5089	28.5792	21.1575	28.3277	27.1399
CG1142	6.8	9.5	2L	9.65894	3.09599	9.68645	13.1411	34.8911	16.2713	58.9736	43.718	23.3787	26.9235
CG11425	6.1	4.7	3L	3.40604	2.63483	2.68092	2.98695	0.0170002	0.0369388	36.6237	29.1571	10.1831	10.6645
CG11426	6.1	4.7	3L	1.67451	5.66442	4.47416	4.112	0.229886	1.90877	60.0051	67.947	117.496	143.567
CG11436	6.1	4.5	X	7.10632	1.27131	0.551107	2.50378	15.0835	0.332987	17.3616	12.7475	32.412	35.7028
CG11438	6.3	4.3	3L	0.723139	7.30039	1.88655	1.49259	0.0471721	16.1476	65.3882	30.3672	88.9639	96.6372
CG11447	6.5	10	3R	7.02503	5.15495	2.83347	2.95088	8.60713	2.73481	33.8002	29.824	33.796	33.9931
CG11448	7	4.8	U	10.7369	10.3325	73.2619	99.0782	25.6083	10.738	32.9593	28.648	81.6435	95.4518
CG11454	6.3	9.2	2L	8.92506	8.59443	16.4374	16.1057	7.75163	9.87537	89.6466	42.1092	69.4553	70.1706
CG11455	6.4	8.8	2L	8.77542	10.2965	14.5938	5.29562	6.18636	3.4451	10071.9	13040.6	4777.31	3845.04
CG11456	5.9	3.8	3L	4.34234	1.69969	1.28053	2.63707	7.02897	1.2021	9.17252	7.73886	16.9642	20.3696
CG11486	6.3	4.2	3L	7.01709	4.49714	17.5643	21.5743	24.3835	2.52418	89.0294	85.2509	118.718	99.5004
CG11490	6.4	10	2L	9.15424	4.92334	2.90355	4.88676	19.1294	8.36228	63.3841	50.1236	79.9426	86.4393
CG11498	6.4	9.1	3R	0.314984	0.246784	0.280573	0.395604	0.0299063	0.365266	2.00179	0.160409	1.09462	1.32086
CG11504	6	7.7	3R	14.7563	6.55467	7.19716	10.3513	37.6473	28.8863	6.86695	6.36977	19.0256	19.8085
CG11505	6.1	4.2	3L	18.8961	17.9013	4.88074	8.29346	39.571	24.2661	29.3898	29.2589	78.8031	62.0087
CG11523	6.6	5	3L	27.2657	11.0669	6.32811	9.16552	31.8021	8.58876	82.5533	50.3371	50.9477	54.546
CG11526	6.7	4.4	3L	19.792	31.0715	4.33549	5.84369	12.6879	40.8812	30.9283	22.2406	40.3009	43.5464
CG11534	6.7	4.5	3L	7.72122	4.48169	0.661977	3.13736	5.68443	3.56161	16.0653	11.4861	13.5727	13.9873
CG11537	6.7	4.6	3L	3.13457	5.52596	3.74837	5.56363	2.71804	9.07879	44.6342	40.9288	150.746	148.445
CG11550	7	9.3	3R	0.865865	2.33746	9.51126	10.0551	0	0.526648	10.8363	9.78715	38.1059	53.6632
CG11563	6.6	8.8	3R	15.0124	2.27691	3.32155	6.05438	35.6692	6.21776	125.629	83.5231	82.8281	86.6727
CG11566	6.2	4.4	X	0.416866	1.78495	0.173207	0.38072	0.0623932	0.0571259	20.2147	6.93682	23.0901	45.2162
CG11576	6.3	8.6	3R	7.60932	7.40919	1.64236	3.39524	4.89506	2.77852	66.4106	44.5664	17.5215	21.2818
CG11577	6.1	4.2	X	11.1243	3.58419	5.98842	10.5705	32.9673	7.65716	41.6096	41.2275	48.47	61.04
CG11583	6.9	4.8	3L	29.2115	3.87991	8.38298	8.92308	67.0302	9.52558	107.823	67.8362	73.0924	81.8927
CG11586	6.9	4.8	3L	14.1424	14.0203	20.2467	29.8825	43.1146	123.546	31.342	17.4739	18.3911	22.0708
CG11590	6.4	4.8	X	16.0316	24.3169	1.49542	2.54479	13.737	21.5559	379.313	450.941	169.648	196.903
CG11592	6.3	9.5	2L	0.966804	1.43107	0.47145	0.988498	0.0174656	0.564539	10.4141	9.77573	3.9063	3.44277
CG11593	6.4	4.5	3L	14.8289	4.54303	6.08828	10.9386	40.4616	5.66666	13.2138	7.89954	25.1847	31.3722
CG11594	6.2	4.7	3L	9.84304	23.0961	22.7816	28.4947	0.394045	7.23141	67.6896	43.9895	61.4836	42.9335
CG11596	6.1	4.5	X	6.74934	1.50901	1.93459	3.15498	7.64634	1.17957	86.2824	60.936	126.416	96.4677
CG1161	6.3	8.9	3R	19.8065	20.6588	14.7962	23.2331	12.4413	15.8702	118.781	165.441	127.673	188.768
CG11617	7.1	8.9	2L	0.841591	3.10044	1.2424	1.86834	0.0460162	0.179962	24.5493	22.0135	11.6175	14.1846
CG11637	7	5.5	3L	9.91852	6.71748	0.0152224	0.0966343	0	0	1.00415	4.83522	2.75213	9.58607
CG11638	6.1	4.4	X	0.198239	0.469969	9.11357	4.09093	16.4454	0.194864	10.9488	11.8218	120.454	101.769
CG11652	6.6	8.8	2L	9.4181	5.48226	1.71007	2.63191	11.147	6.13864	87.7705	95.882	66.3683	66.2607
CG11655	7	4.9	X	6.4515	5.72181	3.1354	5.63161	5.91252	2.77685	62.8937	51.4353	41.5875	40.0345
CG11658	6.6	4.6	U	1.1035	2.80357	6.11177	7.24192	0.963665	5.83379	50.9468	57.7479	93.6743	119.016
CG11660	6.5	4.6	3L	16.0211	1.73236	4.29033	5.93979	46.5128	2.88048	24.0304	16.7145	13.9748	16.6531
CG11665	5.7	8.3	2R	6.42925	2.9771	1.42606	2.25293	7.44227	1.44392	40.9373	45.1205	43.9934	56.0025
CG11679	6.4	4.6	X	7.1152	4.51339	1.83672	3.09706	17.5801	5.87054	83.5622	65.8087	41.7513	46.9242
CG11693	6	8.9	3R	0.063763	0.432297	0.132281	0.0977544	0	0.00721153	2.46418	0.979732	17.7734	17.6889
CG11694	6.6	8.9	3R	0	13.0008	0	0	0	61.5467	0.196249	0	0.132008	0
CG11699	6.5	4.9	X	20.0915	23.7565	50.1233	48.7487	56.1417	46.9489	281.58	337.728	182.076	192.234
CG11710	6.7	4.7	X	9.86457	5.82628	7.02955	6.11855	21.1885	21.8737	42.8058	31.8625	41.4681	46.2269
CG1172	5.8	8	3R	8.93104	6.55396	3.49233	4.30366	18.1441	22.8434	46.918	49.7974	74.6569	109.088
CG11722	5.9	8.3	3R	6.32045	15.6928	7.78072	10.2044	15.1996	194.073	238.22	175.175	107.497	110.11
CG11727	5.8	4.4	X	2.5469	2.32104	2.52657	4.06677	6.08167	2.91464	30.4427	27.5337	106.035	97.2622
CG11737	6.3	8.1	3R	8.38494	10.1813	3.29211	6.43723	16.1036	12.2977	53.6373	48.2678	78.8489	83.4517
CG11739	5.3	7.4	3R	11.604	26.3433	24.8983	40.812	35.1508	59.6159	442.707	613.727	329.655	433.045
CG11750	6.5	4.5	X	9.4317	1.74058	7.57167	8.88848	42.4448	4.95631	73.5618	37.7553	57.5553	101.541
CG11752	6.4	4.4	X	39.6773	91.2558	18.5563	19.245	19.0826	14.1803	5574.99	7948	3736.73	2333.91
CG11753	6.4	8.7	3R	17.7714	25.817	4.83247	6.66801	6.65235	7.42666	54.0754	58.6592	62.6827	113.765
CG11760	6.1	8.7	3R	8.96338	2.52958	17.1699	19.0938	89.9593	5.10211	201.766	169.27	76.3408	75.4793
CG11768	6.4	8.6	3R	7.37502	1.2993	1.97235	3.7394	0.00132834	0.063989	7.86202	8.35992	39.8404	35.7742
CG11771	6.8	9.2	3R	16.7737	13.7054	5.94497	10.0999	31.2521	43.7654	77.521	54.4775	58.1089	56.9903
CG11777	6.3	8.9	2R	8.00356	3.87217	2.12772	3.22259	20.1936	13.2866	22.2102	13.1079	10.069	13.9266
CG11779	6.3	8.2	3R	38.3357	15.6006	4.67377	5.9306	21.2307	61.6994	65.9639	52.4014	30.5237	36.2455
CG11781	6.9	9.1	3R	13.9792	7.68629	0.816404	1.65368	3.28028	4.67354	113.297	99.5919	74.7607	77.2443
CG11786	6.7	9.5	3R	0.0217994	0.164376	0	0.0246243	0.204024	1.63062	52.8881	6.70664	9.02087	10.2596
CG11788	6.7	9.1	2R	7.25595	1.28422	0.364942	0.867473	5.8432	2.94184	19.9561	7.63867	8.02939	6.67664
CG11790	6.4	8.6	3R	12.2688	7.68663	5.70618	6.76693	14.5901	11.289	211.434	133.247	111.589	138.08
CG11791	6.1	8.5	3R	5.54366	11.6105	32.4577	40.5038	16.8884	6.87455	726.363	724.804	536.213	1041.21
CG11796	6.5	4.6	3L	13.9876	12.4979	30.7172	43.0462	0.00995671	0.0894827	722.962	1116.21	347.557	428.268
CG11802	6	4.4	X	10.9158	7.22077	8.65203	11.5745	31.6394	32.1187	12.3237	7.81284	18.3052	22.5526
CG11807	6.5	8.8	2R	9.43828	6.30301	6.11197	10.783	33.0256	13.2841	23.287	18.8072	52.1388	62.7707
CG11811	5.9	8.2	3L	25.6236	4.8983	10.4101	13.5735	84.2508	10.8822	62.2197	56.2007	65.2756	93.3195
CG11825	6.3	8.9	3R	7.47513	0.474254	1.09261	1.11636	23.1599	1.24742	20508.9	23068.3	7567.31	12219.1
CG11835	7	4.7	U	0.721558	5.53181	8.43063	5.97047	0.0178394	1.79898	178.505	124.612	107.346	56.496
CG11836	5.8	8.5	3R	5.54401	0.602585	0.438478	0.786116	13.6916	0.880714	7.87668	5.44081	5.20996	6.63154
CG11837	6.1	8.6	3R	13.5098	1.77056	2.38661	2.23211	14.8421	3.48788	37.907	29.252	30.4117	41.2524
CG11851	7	10	3R	11.7106	1.77801	0.853395	1.81444	19.6694	0.962731	20.18	16.0937	26.1277	29.223
CG11852	6.2	8.5	3R	2.17992	7.05903	1.42191	2.21826	0.600902	5.08916	0.227184	0	0	0
CG11857	6.4	8.1	U	30.7269	25.1226	23.1835	37.6967	49.9866	25.7877	240.67	203	348.325	395.843
CG11858	6.8	8.6	3R	19.8605	6.87403	7.69876	7.99105	11.3614	18.0491	46.5568	49.631	38.4145	38.4764
CG11859	6.6	9.7	3R	15.1361	5.31975	4.21755	6.24322	17.6695	6.4591	65.5257	63.6952	33.1552	30.8771
CG11873	6.2	8	3R	2.61918	1.51476	3.0979	4.83697	5.48322	1.02801	10.8151	9.26139	35.5944	28.4359
CG11874	5.8	7.4	3R	17.601	5.10958	4.96648	7.4688	29.9116	1.99031	0	0	0.566376	0.298026
CG11875	7.4	8.7	U	13.5396	2.39408	0.27869	0.531892	10.2593	3.28728	20.0417	18.5107	16.183	21.7059
CG11876	7	9	3R	41.5568	107.078	27.8741	38.0295	27.6625	139.241	353.479	368.938	207.732	257.672
CG11877	7	9	3R	7.93117	10.2341	15.4449	21.0657	26.3303	45.1322	22.7803	18.6712	22.7541	22.0439
CG11883	6.6	9.4	2R	1.03324	0.739014	4.73473	6.97768	3.13367	0.700912	52.6699	47.1323	64.6906	85.8235
CG11885	6.6	8.9	2L	16.7629	20.7075	1.51501	3.49343	20.1231	64.2084	143.76	107.357	93.8299	130.044
CG11897	6.5	8.4	3R	53.6104	4.97862	4.00698	3.93149	109.391	3.50499	13.596	5.6559	17.2006	16.1953
CG11899	6.2	8.5	3R	50.8158	18.5297	15.3181	21.7331	28.6662	14.9002	442.188	626.268	128.956	207.321
CG11902	7.1	9.8	3R	6.45033	2.09511	2.29277	3.51221	17.0838	1.50481	10.2897	5.08175	10.93	13.7881
CG11905	6.5	4.6	3L	0.00120636	0.107429	0.154851	0.0799862	0	2.06395	0	0	0	0
CG11906	6.2	8.4	2R	10.5517	3.52244	2.46153	4.02914	20.1718	7.30598	0.421001	0	0	0
CG11912	4.7	6.1	2L	20.9734	11.3636	0.00984426	0	0.018512	4.80492	14859.1	20177.4	1.29191	0
CG11913	6.8	8.6	3R	0.0276207	21.219	0.00233926	0.176194	0	107.568	0.039194	0.122583	0.135538	0.28119
CG11920	7.2	9.9	U	9.24793	1.82145	1.28503	1.9399	20.9393	4.01274	487.962	373.278	305.312	290.932
CG11926	6.2	8.6	2L	11.2772	6.2596	4.49763	4.78014	15.8532	12.0273	16.0672	15.2159	18.3213	28.1026
CG11943	6.3	4.7	X	20.3406	2.34667	2.19891	2.79691	28.8058	4.1174	16.5844	6.73485	20.6452	18.7329
CG11961	6.4	9.4	2R	5.08104	6.32564	2.86002	3.06712	1.86312	2.05385	26.8492	24.3895	0.267957	0.174689
CG11964	6.4	8.6	3R	16.2028	6.2982	6.41027	9.13733	30.1208	14.2473	26.498	22.8566	34.7095	39.8601
CG11966	6.4	8.9	3R	0.0181081	0.0110603	0	0	0.198635	0	0.116915	0.062794	0.05482	0.099804
CG11970	6.1	9.2	3R	7.55412	2.50223	2.10493	4.14361	15.4504	2.45271	17.634	15.6245	16.7237	17.6468
CG11975	6.5	8.9	3R	8.63178	6.49628	5.1186	8.26033	14.6197	11.6639	17.1773	13.9995	31.849	36.4046
CG11980	6.6	9.2	3R	43.2021	7.90681	5.47939	6.81377	54.7623	5.90449	51.3338	30.8204	47.4758	39.1312
CG11982	6.4	8.7	3R	20.2273	44.6341	8.20078	13.6535	32.8169	147.657	154.481	132.469	264.398	352.507
CG11984	5.3	4.8	3R	27.5165	33.2727	10.9895	16.5238	36.9196	38.7046	17.9698	16.541	28.8591	27.5738
CG11985	6.1	8.6	2R	40.8182	18.3572	14.1338	31.3259	58.2294	35.037	373.663	419.434	384.769	501.057
CG11986	6.4	8.5	3R	6.88085	5.43654	0.242318	0.87959	9.11575	12.1733	37.4549	22.5821	32.6707	32.8061
CG11999	6.3	8.9	3R	23.7462	23.1103	9.47033	12.4948	38.1647	65.9311	204.452	141.653	161.189	359.435
CG12001	6.5	8.8	3R	3.0287	4.04195	1.76798	3.37775	3.96059	2.80162	25.2937	25.8697	32.6569	35.8927
CG12003	6.4	4.6	3L	0.205682	0.520131	0	0	0.00680577	0.00909118	4.94065	3.66358	7.24076	8.57626
CG12004	6.3	4.6	3L	8.8423	8.14532	4.91509	7.56444	13.8221	7.21626	69.04	50.43	88.3485	94.8566
CG12006	6.6	4.5	3L	17.9021	5.80644	4.97877	6.18023	41.2681	6.88263	32.4402	19.2354	34.7145	33.0798
CG12007	6	8	3R	8.68424	6.78917	6.48729	6.52407	12.439	10.8978	27.1332	16.0991	23.6781	40.1801
CG12009	6.8	4.9	3L	0.00343312	0.361647	0	0	0	0.65691	2.84682	4.96503	6.20485	8.8816
CG12010	7.5	6	3L	4.99984	0.894239	0.568428	0.999736	6.64748	0.470977	5.52469	4.15071	7.44123	8.61193
CG12012	6.3	4.6	3L	11.7336	9.45199	18.6099	26.5074	40.7673	17.2055	105.681	63.6113	60.5891	172.957
CG12014	6.8	5.2	3L	0.157405	0.47681	1.02694	1.16628	0.0642021	0.0273269	2.55456	1.03102	3.16114	3.51084
CG12016	6.7	4.4	3L	10.3549	10.2522	35.6725	36.4641	20.4676	22.7227	244.264	384.713	132.73	211.964
CG12017	6.2	4	3L	0.00486221	0.104352	0.00416733	0.0200801	0	0.101696	3.23503	1.54773	0.557426	1.73202
CG12018	6.4	8.9	3L	14.5109	4.21921	2.28056	1.62217	35.5487	32.9474	11.3438	6.36643	5.609	8.19274
CG12020	6.4	9	3L	0.00972237	28.5512	0.00100353	0.000735421	0.0387357	170.398	0	0	0	0
CG12024	6.5	4.4	3L	17.2006	10.1564	42.2828	46.4301	82.0262	49.7261	21.0988	14.3037	42.3268	38.0189
CG12025	6.3	4.3	3L	10.6828	10.379	18.9697	35.4481	25.1335	11.3869	34.0144	27.1084	118.813	118.539
CG12034	6.3	4.7	3L	21.3349	16.1882	3.84566	5.77964	26.0215	35.6212	20.596	17.1762	38.6896	47.0721
CG12038	6.5	4.6	3L	0.341368	2.44733	2.50268	7.2176	0.0421973	1.83396	6.04177	6.48995	38.7574	25.7886
CG12042	6.3	4.2	U	16.5536	6.48558	4.88678	4.90568	22.2113	4.48031	64.2887	60.1658	57.0819	79.6718
CG12050	6.8	8.4	2L	10.1822	4.06957	0.994357	1.36416	12.8206	7.96397	11.2308	4.74084	5.51152	8.59922
CG12054	5.9	8.3	3R	8.27767	3.5075	9.86304	17.1176	26.0199	7.15092	84.6045	84.3321	214.274	215.648
CG12056	5.9	4.5	X	6.24406	6.89969	1.55457	3.59648	2.62424	5.19547	19.4031	14.1365	21.6266	24.0337
CG12065	6.4	4.3	X	1.77521	2.43154	2.15147	3.40851	1.95904	0.980774	70.1055	47.6713	50.187	59.4051
CG12069	5.6	7.7	3R	0.0525296	18.9664	0	0.0297336	0.0253181	53.5253	0	0	0	0
CG12071	6.6	8.7	3R	0.330003	2.13541	22.9199	31.7557	0.0304226	0.0142921	8.52336	9.32102	80.3915	65.9891
CG12075	6.5	4.5	U	0.473612	0.433427	0.508567	0.868312	0.327972	0.162199	53.9894	45.6275	72.5641	54.4534
CG12077	6.8	4.8	3L	5.59776	1.49726	0.951173	0.967974	10.2227	2.84046	67.4853	53.9906	45.6623	44.02
CG12079	6	4.5	3L	61.3167	130.116	22.7819	27.3728	19.7188	73.0289	2553.76	2233.55	815.992	601.815
CG12081	6.4	8.2	U	12.1557	8.01603	6.45334	8.29185	25.0314	15.6532	126.329	116.147	99.27	91.0297
CG12082	6.9	4.9	3L	36.141	12.5341	5.87672	9.60972	49.6447	29.9178	56.8051	42.1758	44.3511	48.1535
CG12084	6.5	4.9	3L	10.8166	8.8296	4.6184	7.67021	17.4623	10.6114	43.0326	40.3923	80.7546	87.7706
CG12090	6	4.1	3L	9.45177	13.104	12.0548	17.9752	8.78127	3.28291	26.8549	19.4316	39.6285	31.8049
CG12091	6.7	4.9	2R	45.4129	55.5979	29.0217	44.6379	34.8737	11.9436	94.1022	128.581	202.014	237.174
CG12093	6.6	4.4	3L	13.1065	9.67694	7.14067	8.92304	14.9607	9.43601	65.3539	96.255	104.068	127.612
CG12096	7.3	5	X	1.63356	6.92047	1.27957	2.93449	10.8892	16.4057	101.22	107.737	126.637	168.473
CG12099	6.4	4.6	3L	21.1585	29.9299	37.4175	50.1346	45.1561	33.6764	133.723	129.928	151.32	167.265
CG12104	5.6	4.3	3L	9.55647	10.137	3.65246	4.96033	22.2695	35.5786	48.5135	35.9604	49.1912	75.7008
CG12105	6.5	4.6	3L	1.80872	7.54101	0.783953	1.09818	0.0407256	0.186896	235.682	149.396	7.18521	9.87551
CG12106	6.6	4.5	X	7.73095	20.4782	0.827058	1.12218	4.83587	0.0645426	9.531	9.7606	20.5938	23.3564
CG12107	6.2	9	2R	33.2629	15.2802	9.88285	17.8503	76.4939	24.0931	219.886	136.107	220.904	196.168
CG12116	6.4	4.9	X	27.4641	24.5294	142.097	102.789	2.10066	6.90359	320.218	118.679	94.712	57.9556
CG12119	6.2	4.5	X	2.38589	6.33541	4.30606	4.45191	0.139457	0.320289	210.668	190.198	102.4	106.598
CG12121	5.9	4.2	X	15.447	13.3289	9.86302	14.9899	31.4788	13.6271	44.2993	37.9571	58.7337	73.9455
CG12123	6.4	4.6	X	14.2231	14.5183	1.22716	3.0357	8.4082	21.5193	43.4857	44.0079	85.0636	94.1531
CG12125	6.3	4.1	X	21.0557	6.89812	3.39995	3.93341	28.6811	10.6004	34.0346	23.7453	35.8664	38.2605
CG12128	6	8.8	2R	13.6309	3.92889	1.57511	1.7181	17.6331	11.3703	11.7431	7.15451	11.254	11.6962
CG12129	5.9	8	2R	17.1126	5.62048	3.351	3.27844	34.608	12.0846	17.7205	13.1059	26.7611	35.8427
CG12134	6.5	9	2R	14.1879	1.93136	1.70967	2.40387	19.4253	3.95004	484.477	338.051	567.499	559.135
CG12140	6.2	8.7	2R	23.8459	21.6295	20.7722	26.1833	35.8275	7.26696	402.084	658.808	282.796	428.033
CG12155	6	4.5	X	11.8117	4.81248	5.27371	7.7477	19.0258	3.43724	14.6796	6.75599	4.75106	6.04251
CG12159	6.7	10	2R	8.76887	11.34	7.265	8.1586	16.3272	25.179	319.581	514.45	390.371	429.153
CG12162	6.3	8.9	3R	14.5309	84.9876	10.4375	19.6374	24.2527	408.485	81.0279	76.7335	56.639	56.3706
CG12163	6	7.8	U	9.2718	18.3703	8.52283	11.1894	8.41179	19.481	304.235	401.383	512.074	566.162
CG12164	6.3	9.1	2R	0.0446133	0.236103	0.0353815	0.0155572	0.0597102	0.291642	2.23453	0.125915	0	0.115614
CG12170	6.3	8.4	3R	12.747	14.4222	2.53858	4.47448	5.56376	19.1535	48.1276	44.1499	37.799	41.1537
CG1218	6.5	8.5	3R	18.0209	3.71925	3.59137	4.72637	36.2525	3.78081	29.1927	21.9646	29.4676	25.238
CG12194	6.5	8.8	2L	1.95873	7.55163	3.34122	6.6022	0.569583	4.79127	50.6921	58.3945	57.0478	80.2784
CG12203	6.4	4.6	X	42.5164	98.9775	43.9575	45.6538	24.7575	47.1361	3751.76	3451.47	683.136	757.009
CG12206	6.3	4.2	X	0.369754	1.67474	0.00116065	0	0.08587	1.28619	6.67797	6.96154	11.8656	10.5219
CG12207	6.3	8.8	3R	4.36062	6.32168	6.64554	10.9107	19.0226	15.5465	59.9829	56.2726	101.06	115.614
CG12214	6.6	8.6	2R	14.2572	46.0162	30.8331	33.4928	28.1645	162.237	61.1816	71.0413	98.2167	136.687
CG12236	6.3	4.5	X	21.6908	9.17963	6.29019	8.19747	18.2156	0.332856	14.774	10.5094	28.4776	28.8044
CG12237	6.3	4.3	X	30.6176	14.0425	8.29099	14.5274	31.4583	15.8718	19.476	16.7126	25.3018	24.2919
CG12241	5.8	8.6	3R	9.23822	10.5985	4.37131	6.08351	20.7739	23.3469	7.96899	5.13283	14.4919	20.7628
CG12256	5.5	9	3R	0.0400393	2.41511	0.114593	0.737984	0	0.196943	12.987	9.66953	4.28521	2.86695
CG12259	6.2	8.8	3R	8.95825	4.33524	8.73946	14.0078	23.3199	21.1344	18.697	17.15	17.3867	22.5635
CG12262	6.1	4.4	3L	77.28	62.9071	11.1075	13.2225	36.5735	6.89955	660.539	1010.91	469.238	540.795
CG12263	5.9	9.3	2R	8.91816	3.89504	1.70901	3.37888	12.9566	3.48799	22.7006	17.7154	58.958	67.8346
CG12264	6.4	8.8	2L	21.7717	23.7867	9.68816	14.2444	22.7551	24.0668	96.2813	129.13	90.0493	105.602
CG12267	6.1	8.6	3R	5.07008	1.01366	3.32104	2.17037	12.1856	1.27371	24.4047	25.317	40.9824	49.1987
CG12268	6.3	8.2	3R	0.605441	11.4257	0.207351	0.509673	0.0262574	1.23547	3.17054	6.04337	9.75511	9.34366
CG12269	6.7	8.8	3R	3.15789	11.0147	20.6264	31.9627	0.0767348	0	105.366	150.297	912.057	1174.18
CG1227	6.4	8.7	3R	9.46632	2.42533	3.2628	3.99422	20.4707	2.74528	27.9539	24.6495	25.9807	29.0084
CG12272	6.2	4.5	3L	8.29831	7.40341	1.69666	2.201	4.33669	1.92359	10.1408	6.55706	16.6209	15.8343
CG12288	5.8	7.5	U	10.5776	0.459317	0.160223	0.451913	24.8733	1.29212	19.403	9.18525	29.7869	27.0315
CG12290	5.7	7.7	3R	2.81862	5.1508	4.20809	5.72572	0.570502	1.04	9.12089	7.84876	25.4206	21.307
CG12299	6.8	8.9	2L	15.8272	3.31078	10.2858	11.7638	53.8039	5.84931	6.12147	3.23279	7.30953	8.06535
CG12301	6.2	4.6	3L	10.414	1.27622	3.99355	3.23658	28.4765	2.48746	12.6523	6.79203	10.6598	8.61214
CG12304	6.2	4.6	3L	21.8237	10.9912	7.19461	11.5578	34.4083	54.275	274.099	203.827	166.418	174.756
CG12309	7	4.9	X	0.0861301	49.0976	0.00656366	0.0440603	0	172.589	3.35733	4.18268	9.71307	11.4405
CG1231	6.8	5.1	X	0.0139483	0.446589	3.49148	5.3578	0.107445	3.90747	32.3603	23.3296	47.3221	42.2024
CG12320	6.8	9.4	2R	4.79162	2.37655	1.3567	2.69187	5.63173	7.5914	64.9928	51.0535	44.4106	48.7756
CG12321	6.7	9.4	2R	43.2132	44.7438	7.92136	15.6531	48.747	125.881	134.121	110.885	88.8505	92.7871
CG12325	7.4	8.7	U	10.0134	0.845765	2.32313	2.40937	15.7877	0.399545	31.0775	20.1321	27.9297	29.8924
CG1233	7	4.7	3L	7.32992	4.6656	4.45485	5.44964	14.8857	5.29003	6.44647	4.69499	6.45432	6.30138
CG12333	6.5	8.6	3R	9.04029	9.15188	7.43394	10.5794	14.0677	18.8913	66.7194	69.2943	128.784	136.259
CG12338	6.4	8.9	3L	9.9186	17.9256	21.9904	12.287	1.87591	2.56958	133.087	154.498	52.5127	59.8272
CG1234	6.4	8.7	3R	15.9662	3.6696	3.90661	4.22709	27.1724	9.04518	15.0258	8.23711	15.2405	15.0742
CG12341	6.2	8.9	2R	7.91483	6.01244	5.86048	5.74859	14.4959	3.67594	16.4792	17.903	58.7424	76.6724
CG12343	6.5	8.8	2R	14.9661	14.9918	8.8245	10.2961	25.0486	79.5598	26.3508	25.5484	26.1439	33.7508
CG12344	6.4	9.1	2R	8.19948	8.06457	13.9021	15.4779	9.99554	6.65105	3.82022	6.71048	46.1592	68.3864
CG12355	6.8	4.9	3L	0.852394	3.88629	1.82546	3.18243	0.116833	3.3694	68.5427	48.3122	299.693	225.467
CG1236	6.6	9.5	3R	21.2793	8.25169	5.33892	7.8455	37.991	22.3043	79.7331	108.82	57.2828	84.498
CG12360	6.4	8.4	3R	11.7246	25.5611	11.0725	19.1105	23.8845	125.552	64.3897	63.8055	102.024	133.201
CG12374	5.8	7.8	2R	665.554	444.448	0.158441	0.012922	0.702627	17.6853	323.418	287.458	0.468258	0.376118
CG12375	6.9	4.7	X	18.0037	16.8296	4.01809	7.14055	19.2746	16.0497	38.3366	31.4885	24.4066	17.8823
CG12379	6.6	4.7	X	3.77104	3.38058	1.21417	1.62686	1.27248	6.73889	193.637	169.023	125.059	69.15
CG12384	5.4	9.3	2R	38.7147	35.2187	64.2747	63.8745	79.12	86.5003	530.802	545.374	458.047	427.075
CG1239	7.1	9.7	3R	15.1072	1.44593	2.1929	2.16698	41.6575	5.61437	48.504	42.7002	50.6006	44.2099
CG12391	6.7	8.5	2R	24.6359	4.26945	10.0333	13.1309	88.4466	2.58142	12.0797	7.98557	21.5868	22.431
CG12393	7.1	9.6	2L	9.5408	6.50992	3.71286	6.534	12.1069	18.5535	46.2138	47.7071	60.3783	73.7801
CG12398	6.1	4.5	X	12.0403	0.067493	0	0	1.47026	0	8.2646	0.755357	0.971698	0.925633
CG1240	6.5	4.6	3L	62.0819	25.499	30.224	53.4913	172.588	147.926	42.7622	27.2339	43.7621	60.3094
CG12404	6.9	5	2L	4.01517	4.01809	1.15795	1.34516	3.24692	4.37243	132.219	121.35	101.949	112.258
CG12413	6	8.2	3R	3.57541	1.60748	0.923656	1.51008	4.31952	0.751395	22.1756	18.2494	34.8807	35.751
CG12428	6.4	8.7	3R	10.0864	7.8837	2.70816	4.43917	15.5802	1.48378	70.2245	114.565	17.1247	14.6712
CG12470	4.9	4.4	X	0.00657557	46.3097	0.102606	0.179824	0	259.067	0	0	0	0.612032
CG12484	5.8	7.3	2R	0.07248	0.311216	0.978494	1.46967	0.00348527	0.0299105	3.5951	5.282	47.0189	34.9891
CG12499	6.5	8.9	2R	19.8799	1.07351	1.31006	1.82682	29.9956	0.507468	7.21138	4.74614	9.83776	13.9402
CG12502	6.1	4.2	3L	0.973196	0.15527	3.55786	6.89198	0.0139012	0	1.74022	1.77861	24.4417	22.0082
CG12507	6.2	4.3	X	0.0120737	0.0153757	0.0619528	0.0981148	0.011512	0	3.88015	4.52774	7.78303	20.9218
CG12512	6.2	8.2	2L	4.66927	6.67468	3.38058	4.85958	6.05511	1.80014	18.1087	18.1787	8.62558	9.97946
CG12531	6	4.6	X	0.25378	1.30674	14.0333	22.4315	0.016712	0.000939251	2.21908	2.40693	33.6609	33.7107
CG12539	5.8	4.2	X	0.0203724	0.0457959	0.00472274	0.00692197	0	0.0517312	0.15053	0.105675	0.245451	0.110485
CG12541	6	4.2	X	0.0291368	0.0845111	0.198586	0.28598	0.00915213	0.0223108	4.54989	4.75328	24.9871	22.9615
CG12547	9	12	U	12.2527	3.855	8.55794	12.9894	27.1769	3.15046	23.1711	20.2951	39.545	50.2193
CG12567	6.4	8.2	2L	3.72389	0.734052	4.08275	6.65315	10.3639	1.32402	15.8912	14.0864	17.2296	25.1679
CG12581	6.8	9.3	3R	1.13851	2.10551	13.8206	17.893	6.21263	8.1431	25.1487	25.0232	49.4581	51.4324
CG12582	6.3	8.5	3R	8.14933	6.35101	5.11198	6.07456	8.68906	7.03043	143.665	201.734	11.3066	9.85197
CG12594	5.6	8.9	3R	0.0709827	0.597768	1.43469	2.85081	0.00617124	0.356024	10.4919	12.8252	63.9408	60.3838
CG12605	6.3	4.5	3L	0.194651	10.8003	9.75039	16.2159	0.129185	42.6043	1.98585	2.21755	40.8256	31.8115
CG12608	5.9	4.5	X	12.3237	4.50889	13.0133	16.6677	31.5272	25.9551	45.1588	33.3228	21.0345	23.9953
CG1265	6.6	4.5	3L	7.91795	6.61041	0.88377	1.69386	1.5844	1.96608	103.267	105.833	78.042	90.4556
CG12672	6.4	4.3	X	0.0201447	0.401716	2.27323	6.45839	0	0.341467	3.12493	5.40191	42.9835	41.3773
CG12702	6.6	9.2	U	7.20204	3.86799	0.0348534	0.218729	23.5713	17.5132	2.91998	0.10282	0.054117	0.073301
CG1271	6.4	4.7	3L	3.01144	6.07294	2.6645	2.4553	1.52631	5.43179	30.2099	31.4302	26.5296	27.0204
CG12713	7	5	3L	4.89393	2.66944	0.372456	0.762512	10.3475	5.42209	80.7265	47.6588	197.878	169.093
CG12717	6.6	4.4	3L	7.91918	1.11839	6.53522	8.08094	38.0688	0.808338	33.3136	27.4413	35.2493	36.5793
CG1273	6.4	7.9	3L	0.0218716	0.0242787	0.0048946	0.00631373	0.00599362	0.0677845	0.677505	0.349739	0.572651	0.55013
CG12736	6.8	9.4	2R	11.9696	32.7672	3.74232	4.36454	9.27077	93.1205	102.775	89.7476	63.9724	56.3349
CG12746	6	8.1	3R	8.40031	11.3389	20.6091	22.3721	18.0807	31.5977	31.4925	33.4578	30.94	37.0213
CG1275	5.4	4	3L	7.32698	12.0974	18.2594	24.2106	19.0055	51.9856	145.605	159.477	114.998	138.249
CG12768	6.3	4.6	3L	0.0983916	0.217429	1.61589	2.31357	0.0963894	0.296977	6.82876	8.59142	15.28	15.7342
CG12769	6.4	8.6	2R	0.609181	0.776408	2.64697	5.12413	0.373775	0.0265044	16.0579	18.9658	39.1859	44.4622
CG12772	6.7	4.7	X	6.06199	4.58172	2.64849	3.37583	3.2216	2.7172	9.40618	10.8364	10.3685	14.9299
CG12773	6.4	4.2	X	19.1767	7.22928	7.78276	10.1073	28.8203	7.57864	24.9171	18.6216	34.2503	28.1655
CG12795	6.5	9	2L	28.1775	12.9111	5.43876	4.43048	33.6224	35.6425	29.5526	32.0566	28.5208	35.4937
CG12814	5.5	7.6	3R	0.295392	1.18355	2.61123	2.5448	0.0670376	1.2649	43.1659	44.5916	83.5585	99.9774
CG12817	6.7	9.2	3R	0.138581	4.43923	5.75116	14.0352	0.0819	21.3381	11.4332	13.8795	98.3073	85.049
CG12818	5.8	8.7	U	4.33374	2.16212	2.39689	2.97064	17.1493	12.0458	30.3308	15.0411	13.3098	17.375
CG12822	6.2	8.8	2R	18.6821	18.1388	19.5977	34.3658	25.95	16.9642	34.0579	20.5462	52.8805	58.7585
CG12836	5.9	8.9	2R	0.0110361	0.0898281	0.172461	0.188225	0	0	0.585088	0.82848	0.15104	0.967813
CG12848	6.2	8.9	2R	8.19541	17.3487	11.9985	14.3671	27.9375	31.0642	203.995	191.851	76.769	104.889
CG12851	6.1	8.6	2R	0.181276	1.71472	3.00968	5.62886	0.0453728	1.20387	3.96503	4.64374	22.5737	21.4083
CG12858	7.1	9.5	2R	0.761834	5.49245	12.0856	27.3849	1.70924	0.00432546	31.7393	34.9807	218.979	264.395
CG12863	6.2	8.4	2R	6.19933	1.39292	1.56838	2.92755	23.3847	1.51493	7.44393	2.08645	7.39861	6.2078
CG12866	7	9	2R	0.00328834	2.94893	0	0	0	7.74437	0.102565	0.036113	0	0.24804
CG12877	6.2	8.2	3R	13.2941	3.21903	6.29687	9.95519	48.7762	10.3529	18.9103	11.1739	18.4772	17.5383
CG12880	5.4	7.5	3R	0.354158	7.7718	0.0291252	0.077873	0.485441	1.03369	1.09587	0.50833	5.77611	5.55349
CG12896	6.7	9.3	2R	7.40981	20.7966	21.356	71.0455	24.0154	228.81	302.435	194.649	100.036	122.522
CG12909	6.2	8.7	2R	19.9608	2.21657	3.53344	4.80974	61.4432	15.025	106.528	60.9334	71.2875	68.8858
CG1291	6.4	8.9	2L	10.1672	9.66322	4.07323	4.30163	9.6363	11.7479	42.8275	35.6918	52.0732	73.1769
CG12910	6.4	8.7	2R	0.423928	1.58448	0.964227	1.45994	0.0576435	0.0759288	9.20156	10.0175	94.7527	93.5453
CG12920	6.4	4.5	2R	4.47354	2.94078	0.539679	0.669789	1.77773	5.36902	1.69306	4.77542	12.4442	8.08904
CG12935	6.2	8.9	2R	12.4744	4.3896	0.878738	2.1634	9.99256	3.89142	209.964	149.941	75.7733	78.9383
CG12947	6.5	8	U	0.50775	0.427011	1.12702	0.989868	0.595243	0.128762	14.0685	10.7304	28.0723	21.3409
CG12948	6.5	9.2	3R	16.3556	3.73386	8.01157	12.4792	67.8979	25.1231	145.052	85.8186	77.9447	74.4419
CG12950	6.8	9.3	U	0.198279	1.38018	6.07278	9.39528	0.0330612	2.01056	10.2461	13.304	30.5872	28.8419
CG12951	6	9	3R	0.00825607	0.00836973	0	0	0	0	206.975	186.734	0	0.071939
CG12964	6.3	8	2R	0.00383452	0.0842711	0.0158758	0.0753943	0.00146631	0.0583323	23.4247	19.5193	5.44889	5.09813
CG12975	6.6	4.3	3L	8.95248	2.46106	0.744361	1.03443	5.63451	1.84064	66.4408	26.8101	33.755	42.5865
CG1299	6.5	4.6	3L	2.33502	8.21371	10.278	11.5213	0.0655916	1.33156	36.2931	28.4439	26.101	30.8757
CG12991	6.3	4.6	X	0.481351	2.59146	1.83806	3.60997	0.663221	6.80972	152.873	125.899	619.997	855.975
CG12994	6.1	4.4	X	0.400421	0.701727	1.12513	1.60049	0.00152495	0.0328503	9.67228	17.1641	230.871	151.347
CG13001	6.3	4.7	X	5.13969	1.38961	4.33768	6.40734	17.1404	4.66683	7.30627	3.49525	9.65305	9.38989
CG13003	6.2	4.2	X	0.14414	0.604498	0.630541	0.783126	0.0298344	0.0139703	37.0405	36.028	116.802	87.1611
CG13004	6	4.3	X	2.07115	2.27836	0.610128	1.02654	5.87074	31.4612	102.886	65.7868	70.2038	103.29
CG13005	6.6	4.6	X	9.09644	0.920964	0.407058	0.878699	14.1248	1.06334	6.29925	2.20377	4.73073	3.43972
CG13008	5.7	4	X	0.021718	23.4473	0.289538	0.141435	0	170.347	0	0.78333	14.1593	13.5807
CG13018	6.4	8.4	2R	7.49508	11.7005	0.391299	2.52193	2.10687	17.1409	239.513	199.214	143.13	180.852
CG13024	6.7	4.7	3L	0.843581	0.619283	0.209637	0.357472	0.00183837	0.0653652	31.2883	28.2284	50.033	40.3942
CG13025	6.9	4.5	3L	10.5831	1.38879	0.710789	1.42182	26.7929	5.22563	18.3859	13.1779	22.3807	23.4851
CG13028	6.3	4.3	3L	0.0933392	0.0627569	0	0	0	0	7.96245	70.4922	25.897	43.8782
CG13032	6	4	3L	0.0175229	27.6709	0.0150702	0.104677	0	162.793	0.185452	0.097338	0.448115	0.591512
CG13035	6.6	4.4	3L	0.05132	0.21653	0.050469	0.0923227	0	0.013837	0.769539	0.361612	0.729577	0.591369
CG13042	6.3	4.3	3L	0	0.142928	0	0.0115252	0	0	201.475	255.136	35.3987	34.3631
CG13043	6.3	4.5	3L	0.0134193	0.119626	0	0.455049	0	0.71771	13166.7	18984.8	165093	203316
CG13047	5.9	4.2	3L	0	0	0.105875	0.140806	0.0249414	0.0125273	10.206	8.3861	0	6.71328
CG13048	5.9	4.2	3L	0	0	0	0	0	0	1.32102	0	0.724203	0.649251
CG13054	6.5	4.6	3L	0.0128238	0.207737	1.08251	1.72691	0	0	0	0.412243	1.82287	2.33523
CG13055	6.5	4.6	3L	0.0344645	0.253424	1.50755	1.72716	0.0266632	0	0.394408	0.268643	1.54906	2.49246
CG13060	6.4	4.4	3L	0.0859723	0.198922	0	0.770679	0	0.0862726	35.9315	82.6657	186.656	684.758
CG13068	6.4	4.5	3L	0.186278	0.228079	0.00577102	0.185621	0.0305148	0.175443	45.7002	46.8819	115.534	155.039
CG1307	6.6	9.1	3R	35.3031	14.944	6.52289	9.52829	53.1257	40.1927	47.7148	41.6218	72.8675	78.6407
CG13077	6.6	9.5	2L	1.3539	3.5425	7.44407	17.7856	0.093971	0.856633	48.7819	35.8637	59.6991	59.3713
CG13082	6.6	8.9	2L	0.577479	2.07534	3.11864	4.18553	0.0798439	0.0687453	4.6514	2.36744	3.47274	3.27165
CG13089	6.7	9.5	2L	13.5097	5.3129	1.17602	3.40541	17.2095	12.8718	88.442	79.0723	119.916	125.446
CG1309	6.9	4.8	3L	16.6529	25.9912	8.20599	14.6087	18.3483	49.5414	46.9608	38.7196	73.7898	77.8159
CG13090	7.2	9.7	U	10.5989	8.34321	2.46423	4.64736	17.9271	30.7342	39.0696	33.9572	48.7794	54.6358
CG13096	6.4	4.5	2L	35.6238	6.60924	22.2841	25.0769	97.533	43.7839	1623.37	992.983	9363.54	4654.96
CG13097	6.7	9.5	2L	18.3869	2.15489	7.31251	8.68617	68.8277	5.44796	33.5633	24.2022	19.9605	19.2761
CG1311	6.9	4.8	3L	8.81732	4.74687	2.50093	4.34667	11.0826	2.07679	41.5923	40.56	47.8527	49.1654
CG13124	6.5	8.7	2L	8.61001	37.4562	117.97	139.808	3.88505	10.5335	237.923	256.899	316.91	304.188
CG13126	7	9	2L	8.27935	1.68948	2.83048	4.183	16.2964	2.01675	35.3396	29.2108	24.3295	26.6585
CG13138	6.5	8.7	2L	1.17044	0.0611532	0	0.0256354	0.0434028	0.0418097	0.420358	0.91689	2.83809	3.24933
CG13144	6.2	9	2L	3.76971	3.09717	0.43541	0.22687	0	0.329797	314.149	241.43	53.1879	37.5097
CG13148	7	9.1	2R	0.201432	2.62858	1.49134	1.96772	4.08802	16.1499	8.37859	3.528	14.1453	13.7741
CG13155	6.1	6.6	2R	4.9136	4.3025	0.486583	0.0185424	0.0610007	0.0058364	308.22	86.4332	52.9039	91.5026
CG1316	6.9	4.8	3L	11.7554	15.0455	99.5474	108.041	63.6157	71.5057	131.397	111.12	184.514	180.713
CG1317	6.7	4.7	3L	11.8377	39.8402	23.5193	40.2565	15.8004	89.4475	61.7894	50.7572	126.473	107.733
CG13178	7	10	2R	1.61597	1.16256	0.0578725	0.175479	0.0437274	1.20963	2.00631	3.06087	10.8687	11.188
CG13183	6.6	9	2R	0.0193988	0.059232	0.210493	0.217265	0	0.0751064	22.9489	17.247	22.7298	12.8888
CG13185	7	10	2R	6.97983	0.581129	2.76814	2.84057	13.2186	0.568358	4.59891	2.50448	3.95778	4.98158
CG13188	6.3	8.6	2R	0.037186	0.0480016	0.142363	0.292293	0.015274	0.0496023	45.0419	33.0312	47.7648	33.0907
CG13189	6.6	9	2R	7.12834	8.57544	4.75858	7.14986	9.0374	10.4713	72.3895	80.1379	27.7611	27.6824
CG1319	5.9	4.3	3L	29.3017	19.8251	8.09133	6.7696	36.433	22.1748	180.534	168.174	108.265	103.781
CG13192	6.9	9.3	2R	8.70372	4.14382	0.672658	1.37177	6.26615	3.09181	50.0377	43.8613	29.7917	33.6535
CG13196	6.5	4.7	2L	0.158509	0.454411	0	0.0200021	0.0146229	0	1.25585	0	1.64009	0.89126
CG13197	6.4	9.2	2R	3.93989	4.6617	4.8607	6.69095	20.2739	16.811	27.8195	25.7092	24.043	32.1042
CG13203	7.1	9.6	2R	0.0541504	0.843278	0.379895	0.842812	0.00484334	10.3308	21.5621	17.5959	59.399	88.1203
CG13204	6.8	9.1	2R	1.02924	1.3311	2.21839	4.52938	1.70555	0.447587	9.74976	7.7694	39.2958	39.0369
CG13229	6.3	8.6	U	1.85156	0.373694	0.814965	1.14845	6.60888	0.247008	5.20681	4.41137	12.7208	17.3153
CG13243	6.7	9.6	2L	0	32.1043	0	0.0300497	0	34.2967	30.4674	16.9111	32.9984	30.9658
CG13247	6.6	4.8	3L	0.23131	0.215459	0.370273	0.329864	0	0.330829	61.2513	43.1915	41.4799	43.5132
CG13248	6.2	7.4	3L	0.294808	2.1568	8.33324	13.664	0.0339245	0.34305	0.473247	3.50594	0.229751	0
CG13251	5.6	4	3L	0.0202569	0.16567	0.474329	0.319507	0	0.00819795	0.108774	0.171594	1.02859	0.907494
CG13258	5.8	8.6	2L	0.0292902	0.250097	0.0346566	0.0498476	0.0191926	0	0	0	0	0.129401
CG13272	6.3	8.2	2L	0.0069238	0.0443467	0.773965	1.10697	0.00147785	0.0024391	2.17652	1.82499	2.31125	1.85478
CG13278	5.9	8	2L	0.0406194	0.144789	0.0571958	0.00732589	0	0.0107406	1.42307	0.882977	0.680058	0.53657
CG13282	4.8	6.7	2L	0.787127	0.948002	0.0666351	0.146022	0.260965	3.83502	3.35877	2.09525	4.78803	3.76447
CG13284	6.4	8.1	2L	1.07796	3.35945	2.33136	3.15644	0.0670021	0.444723	2.68847	2.1505	1.76644	2.1854
CG13285	6.7	4.8	3L	0.392556	1.15599	0.619261	0.291915	0	12.0673	5.60393	11.7716	126.007	137.654
CG13287	6.7	4.9	3L	0.0337022	0.148024	0.149844	0.214899	0	0	0	0.104743	0.134907	0.38279
CG13293	5.7	4.2	3L	0.14957	0.607431	2.37633	4.18626	0.00799038	0.195156	1.91958	2.41892	26.7383	30.1619
CG13295	6.4	4.8	3L	5.16778	4.60194	5.55166	6.29891	10.0878	3.81209	32.3375	27.9546	24.1102	27.1736
CG13296	6.4	4.6	3L	0.0367832	0.505627	0	0	0	0	0	0	0	0.541381
CG13298	6.4	4.6	3L	31.3262	18.2637	14.1364	24.0673	72.5945	62.0078	252.467	227.712	306.593	391.196
CG13300	5.9	4.3	3L	0.0417599	0.639905	0.39985	0.565141	0.0284469	0.0179235	1.45588	3.50725	14.775	16.365
CG13306	6.1	4.2	3L	0.369669	1.68257	0.462255	0.986711	0	0	104.518	82.4738	29.7311	27.4315
CG13310	6.5	5.8	3L	0.0154617	0.0262538	0.0104791	0	0	0	0.098642	0	0	0.044283
CG13313	6.6	4.7	3L	0.577156	2.04421	0.00265123	0	0.0266716	0.361668	7.84357	5.41765	16.2635	15.3485
CG13318	5.8	7.9	3R	1.44015	1.09547	1.25302	2.90287	0.0572488	0.0576019	2.405	2.96901	14.4035	23.9703
CG13321	6.6	9	2R	18.4705	31.446	0.0346771	0.144599	1.85021	9.16209	188.419	140.585	5.94799	3.16921
CG13322	6.6	9	2R	10.5724	17.5352	11.7605	16.5388	71.8206	93.6902	36.2691	29.6974	50.3912	60.7754
CG13324	6.3	7.9	2R	5.01141	1.09417	0.00921481	0	0	0.801019	3429.56	1760.1	10.6844	1.6635
CG13326	6.4	8.6	2R	0.00580118	22.6831	0.0145677	0	0.000842517	52.4672	0.128611	0.01703	0.143779	0.073203
CG13344	6.7	8.6	2R	18.1369	8.30256	4.10487	11.3925	27.1232	10.3372	15.4168	8.04222	37.2692	34.7643
CG13349	7.1	9.5	2R	56.4916	50.8535	26.6035	33.8753	104.862	201.749	84.4701	80.5304	77.1774	97.5065
CG13360	5.9	4.6	X	5.27767	18.6096	22.7892	23.4706	0.240186	4.84511	2.16857	1.63541	0	0.196628
CG13364	6.7	4.7	X	86.0712	31.9258	61.6298	81.8356	151.645	93.9622	1043.04	809.547	462.516	587.001
CG13365	6.8	5.1	X	13.068	16.7916	7.94921	8.66696	8.61081	7.85049	713.678	611.221	287.769	274.186
CG13366	6	4.3	X	20.4106	2.46562	3.72537	4.40018	43.1826	1.10793	46.661	42.8322	117.043	117.784
CG13367	6.8	8.4	2L	10.5448	4.66087	5.57467	7.93666	20.7478	8.65202	48.6284	76.368	47.3575	85.6972
CG13369	6.7	4.7	X	14.2649	13.0097	8.17684	7.93548	8.83372	15.5503	32.0722	37.593	35.1711	41.8088
CG13375	5.7	4.3	X	0.217461	0.230854	2.47516	3.77301	0.0979253	0.337741	3.32052	5.3827	43.1097	34.5968
CG13377	6.3	4.2	X	1.61999	1.41644	9.62655	13.829	25.7214	14.5338	82.3392	88.1728	175.266	187.829
CG13384	6.8	9.1	2L	6.25012	3.83595	3.76183	6.74908	5.44573	2.8515	36.2051	30.1332	82.561	95.4456
CG13386	6.2	4.5	U	0.0812722	0.524257	0.0141818	0.0233841	0.0175452	4.90416	0	0	0	8.08962
CG13390	6.5	8.7	2L	5.70693	3.44984	2.58217	2.69811	4.83462	2.39954	89.817	65.1977	88.4977	80.0204
CG13397	6.8	9.1	2L	11.1155	2.1226	4.44207	3.67795	19.5686	0.727245	4.61829	2.8355	5.42211	7.10885
CG13404	6.6	4.5	X	0.973082	2.14174	1.99463	2.42772	0	0.0150904	47.2228	38.0253	82.6903	81.451
CG13408	6.3	8.1	3R	0.0561851	0.238879	0.621131	1.43755	0.00773958	0.00479965	10.8527	0	79.0626	27.9641
CG13409	5.7	7.9	3R	0.666823	3.14934	6.09554	10.9275	0.0268278	0.540539	3.78122	4.86942	41.1042	39.3133
CG13436	6.3	8.8	2R	1.05801	17.6983	0.792762	1.27397	0.0238486	37.8684	2.00796	1.15677	3.10925	2.99291
CG13437	6.1	7.2	2R	0.101361	0.872836	0.0852298	0.320831	0	0.0275996	3.17101	3.07716	23.3314	18.2264
CG1344	7	9.2	U	12.9194	3.41166	2.00447	3.31925	18.2011	1.0698	21.1697	17.3075	31.2491	34.5227
CG13449	6.4	4.5	3L	0.0117801	5.74097	0.110027	0.409399	0	47.8998	0.096085	0.034289	0.100274	0.057872
CG13458	6.4	4.5	3L	0.237437	1.59962	0.864298	0.705497	0.00615387	0.230127	11.2082	14.3526	2.95987	6.0058
CG1347	5.9	8.2	3R	9.87803	4.2633	12.5098	12.1056	25.1066	2.36349	25.8139	25.7919	44.1655	44.5813
CG13472	6.7	4.7	3L	13.6668	4.3838	7.14976	9.12223	31.1605	8.22326	12.5069	7.11988	12.9638	11.8966
CG13502	5.4	8.8	2R	0.109953	0.625065	0.0472383	0.229807	0	0.0791709	0.265723	0.421419	0.206123	0.181981
CG13531	6.9	8.9	3R	6.35674	3.3214	2.02098	2.74288	7.70612	1.59201	38.5551	35.1075	97.7127	148.965
CG13532	6.4	8.6	2R	0.138591	0.774316	3.40321	5.83388	0.00981954	0.0724145	4.57563	4.929	32.8274	28.7585
CG1354	6.2	4.8	X	40.3721	10.6886	12.8986	14.0458	62.5035	16.863	241.648	164.784	164.679	188.639
CG13551	6.6	9.4	2R	16.5896	13.9212	5.86383	6.93899	20.3165	33.775	1469.17	1296.42	983.039	1062.7
CG13558	6.4	4.4	X	0	1.5893	0	0	0	5.06606	0	0.435271	1.45012	0.368692
CG13567	6.4	8.7	2R	9.67547	4.70054	7.37958	11.8397	26.8468	5.41707	48.6682	38.6716	50.1595	68.6459
CG13579	6.4	8.9	2R	0.0114744	4.33471	0.423782	0.813509	0.00140099	33.5259	2.16342	3.48179	21.7078	24.1702
CG1358	6	7.6	2R	1.06626	1.21457	47.1573	45.1614	2.05464	1.30306	9.02977	10.4045	82.4033	90.4372
CG13601	6.6	8.3	3R	17.8118	8.44588	2.38412	6.64305	20.992	10.4972	37.1182	33.7819	27.8621	42.4379
CG13603	6.9	9	3R	20.4886	13.3609	2.91532	6.96152	8.98114	5.71579	206.181	207.018	322.652	413.321
CG13604	6.1	8.5	3R	2.29544	1.72526	2.38835	3.91013	6.01206	0.543152	16.3368	16.8184	63.0113	79.5599
CG13605	6.2	8.2	3R	13.5966	10.5112	4.99488	6.93875	19.2344	21.5909	31.1339	24.1245	32.6145	38.9993
CG13606	3.9	4.5	3R	0.076218	0.297988	1.55246	1.65354	0.0043488	0.0608009	63.8039	23.0732	121.004	35.1308
CG13607	5.7	8.2	3R	6.54383	18.3067	20.8856	19.4658	0.12116	0.893528	154.252	202.433	94.2178	105.943
CG13616	6.1	7.6	3R	0.547408	0.402135	0.00771981	0.0165477	0.0181462	0	0	0	0	0.267837
CG13617	6	8.2	3R	0.0296576	1.93157	0.024935	0.171238	0.0127707	12.8447	1.80663	1.38518	6.63049	4.05297
CG13618	6.6	8.3	3R	0.61618	5.33724	1.87848	1.81698	0.0305285	0.149682	11.824	8.74085	5.19933	6.76193
CG13623	6.7	9.1	3R	7.57492	19.9775	1.8294	5.20177	3.57586	22.9405	681.822	713.187	580.467	351.048
CG13624	5.7	8.1	3R	1.54026	1.13236	3.88004	4.77787	4.47399	0.372349	176.592	147.807	266.112	278.607
CG13625	6.6	9.1	3R	12.1863	1.9116	17.0879	19.4401	86.335	8.30889	13.2375	9.23456	9.82363	8.35451
CG13627	6.5	8.3	3R	0.00361463	0.0647648	0.0122132	0.0500105	0.0034693	0.034719	3.44485	1.18486	1.34238	0.898907
CG13630	6.5	8.3	3R	29.7884	16.7466	4.86736	5.45948	14.3997	53.987	85.3992	87.4191	95.6693	110.882
CG13634	6	7	3R	0.00463424	0.0139279	0.0440023	0.120086	0.00276903	0	0.060126	0.221688	0.71971	0.72707
CG13636	7.1	9.7	3R	1.05632	0.852352	2.09925	3.00472	2.84898	0.0998699	61.2098	58.9432	109.249	97.924
CG13643	5.6	7.8	3R	0.0302278	7.00399	0.245507	0.755963	0.0231567	0.0176067	14.1322	9.99606	16.7281	5.6263
CG13646	9.3	13	3R	0.00902709	0.128397	0	0.0344906	0.0173283	0.0447641	3.89153	2.90805	14.9902	26.8129
CG13650	6	8.1	3R	0.501594	2.39375	17.3681	24.7644	0.604283	0.354684	8.56541	11.4784	49.3886	66.0359
CG13654	6.2	8.5	3R	0.216707	0.594171	1.07264	1.22347	0.0267185	0.0158747	8.50268	10.3118	28.5133	31.2586
CG13663	6.2	8.4	3R	1.54362	1.3962	0.895938	0.789989	3.42706	2.55474	217.467	152.442	128.233	134.586
CG13667	6.2	4.4	3L	4.31997	11.8341	1.74265	2.12284	5.19229	52.2537	11.777	9.03394	15.059	13.3374
CG13670	6.4	4.4	3L	0.227688	2.14716	6.48201	34.708	0.0106242	0.0964105	0	0	5.8242	1.0116
CG13675	6.1	4.8	U	0.00668516	2.9935	0	0.00564505	0	0	0	0	0	0.506287
CG13676	6.6	4.7	3L	0.197365	0.107255	0.119727	0.0974482	0.252169	0.28697	57.9754	34.3756	52.5194	27.8034
CG13685	6.8	4.5	3L	0.16204	1.1648	5.69426	9.03106	0.0135505	0	11.28	11.2019	119.12	103.445
CG13690	6.6	8.9	2L	13.9329	0.208595	0.0765871	0.0494666	45.1847	1.27477	7.47227	3.16677	7.01224	10.3192
CG13692	6.2	8.8	2R	0.156422	0.531643	0.0190735	0.0150529	0.10301	0.202869	5.13978	3.84271	0.346353	0.348218
CG13698	6.9	5.4	3L	0.976588	0.432819	0.283987	0.426481	0.893966	0.241283	18.2138	13.6537	36.4675	40.2854
CG13699	6.2	4.4	3L	0.011357	0.00935623	0.000922569	0.0382075	0.00764715	0.147486	1.3544	0.474093	2.85902	2.04787
CG13708	6.5	4.6	3L	0.0172871	0.215453	0.526411	0.632418	0	0.0210483	0.362233	0.324822	0.802821	0.551642
CG1371	6.7	9.2	2R	22.7958	10.7156	5.27039	7.81559	23.5781	8.88901	40.7067	34.0132	49.8297	63.4969
CG13728	6.3	4.1	3L	0.296122	0.229201	0	0	0.0371603	0.77932	201.896	218.318	1178.96	1598.85
CG13739	6.2	8.4	2R	0.0264736	0.249068	1.86665	2.35854	0.00269869	0.000200732	0.712208	1.25636	20.5458	13.9447
CG13743	5.9	9.4	2R	0.102138	0.927617	4.41011	9.02133	0.00446179	1.52444	4.06147	0.87819	33.6815	37.93
CG13744	5.9	7.8	2R	0.253942	0.0480747	0.00254751	0	0	0.0556461	3.56189	0.667902	4.74058	1.56331
CG13748	6.1	8.7	2R	0.0600338	0.541304	0	0.183097	0	2.46011	5.08327	0	0	0.29534
CG13759	5.9	4.3	X	0.0846493	9.17369	0.49671	0.920829	0	4.61363	27.9727	18.8331	40.0023	41.5123
CG13779	6.9	8.9	2L	98.9936	33.7464	31.2635	44.4094	183.493	83.8166	4742.04	5172.12	1848.49	1982.79
CG13784	7	9	2L	4.34566	4.17831	10.5897	16.5439	8.14161	2.86069	54.2889	52.8833	139.508	117.546
CG13795	6.1	9.1	2L	0.888205	1.42743	1.17357	1.50753	0.0655838	0	69.7536	73.4333	89.2443	108.693
CG13796	5.6	8.7	2L	0.736322	1.13853	0.893497	0.828748	0.470672	0.143936	19.5361	18.2899	31.5535	31.8768
CG13800	6.2	4.3	3L	0.720148	2.94925	2.57399	4.09124	0.92435	0.968073	16.675	19.8252	58.2201	55.3851
CG13813	4.6	3.9	3L	2.17307	0.358786	0	0.0401104	0.131151	0.253765	24.0557	10.0496	11.6188	16.1896
CG13827	6.5	8.8	3R	2.00869	3.81396	0.251356	0.669598	1.48929	1.91262	86.2086	69.2403	59.2011	80.1211
CG13830	6.6	8.2	3R	1.75816	4.46368	25.307	31.1561	0.0217355	0.0178015	36.5736	54.3933	321.039	400.944
CG13840	6	7	3R	0.0594152	0.383064	0.362708	0.470505	0.0814284	0.0225121	0.052436	0	0	0
CG13842	5.9	8.1	3R	0.0152219	0.528434	0	0.044166	0	0.748337	0.144743	0.241697	0.540403	0.439407
CG13847	6.2	7.8	3R	0.00791359	0.109363	0.0396958	0.0590582	0.0138184	0.662763	3.41066	2.34424	3.3707	2.60567
CG13850	6.3	8.3	3R	5.39002	7.84754	0.873423	1.28263	5.57775	1.51868	98.2454	93.9824	51.5495	67.1215
CG13855	6.3	8.3	3R	0.217103	13.0689	0.0164123	0.0926212	0	33.9577	2.83161	3.01887	4.88422	3.40187
CG13865	6.4	4.7	U	13.5859	4.11715	8.94798	13.13	42.7863	6.3145	220.203	160.63	113.133	86.2309
CG13868	6.9	9.2	2R	12.9964	45.2112	15.6323	23.144	0.787864	3.87449	155.527	144.059	212.418	250.458
CG13875	6.2	4.4	3L	0.330247	0.361913	6.60244	4.22801	23.624	0.179343	5.22666	4.7175	11.6199	9.53855
CG13887	6.7	4.9	3L	34.838	27.5224	22.2315	30.7443	65.2863	76.4178	541.031	455.454	484.873	418.862
CG13889	6.5	4.5	3L	0.0431894	5.41231	0.0967028	0.283563	0.0097271	28.9395	0.372589	0.222982	0.595657	0.512131
CG13890	6.2	4.5	3L	18.5271	7.43106	1.12105	2.50366	12.1653	7.44348	25.3508	24.4372	20.8382	36.692
CG13893	6.4	4.8	3L	2.36011	4.47885	3.64669	4.46281	1.26289	4.42503	49.4003	55.4126	45.5291	60.996
CG13894	6.1	4.5	3L	0.0427694	0.201907	4.66995	0.944345	23.1864	26.8331	16.2224	13.9009	34.9961	31.814
CG13895	6.4	4.7	3L	2.96487	1.82408	12.6857	17.3671	9.71444	1.66593	20.471	11.5613	18.9766	18.6118
CG13900	6.7	4.9	3L	40.7219	6.72524	9.14239	6.11877	28.8042	3.19956	51.7269	30.1133	58.0109	58.5371
CG13901	6.7	4.9	3L	8.06083	17.0244	6.70036	5.65348	29.2633	289.224	17.6048	13.4706	17.1135	15.5473
CG13902	6.7	4.9	3L	7.12861	3.61032	11.2448	3.4653	8.39007	5.5884	25.6371	17.1049	51.1726	57.7923
CG13907	6.2	4.5	3L	25.3244	16.9579	12.5463	23.4772	37.5208	13.5135	68.2481	78.834	167.259	141.648
CG13908	5.7	4.3	3L	1.62661	3.85215	32.8938	51.9264	1.24726	0.0778129	5.94949	5.35562	43.4268	31.0474
CG13917	6.5	4.5	3L	6.17604	4.41883	5.20722	8.9897	9.19924	0.910373	14.6218	16.9955	55.8825	49.2131
CG13919	6.9	4.9	3L	3.98651	3.10243	3.37116	5.1476	6.98028	2.7668	56.9514	28.4164	41.4641	53.0866
CG13920	6.9	4.9	3L	1.40627	7.75681	4.36826	8.33719	0.202685	0.180213	58.1185	44.1053	57.9613	61.0219
CG13921	6.4	4.4	3L	3.72539	1.22199	2.35453	5.46185	11.9495	0.321452	4.2545	2.66748	8.43671	6.87236
CG13924	6.4	4.6	3L	0.272426	0.297211	0.179896	0.497639	0.093728	0.134656	0.380638	0.526787	1.13517	0.771935
CG13926	6.5	4.6	3L	9.8661	10.3315	3.41616	4.39549	20.0269	25.1539	348.569	219.438	388.576	487.316
CG13928	6.4	4.3	3L	2.21122	14.5215	139.968	205.39	0.274774	7.50031	86.3608	97.5997	1016.99	933.218
CG13930	5.9	4.4	3L	0.0155217	0.0271793	0	0.0598666	0	0.2028	0.963183	0.506442	0.935627	0.807157
CG13933	6	4.8	3L	12.9581	7.11717	7.43073	11.4225	22.2906	2.78421	34.6303	23.3029	64.9111	60.2099
CG13937	6.5	4.7	3L	0.706709	3.89711	10.8498	17.5245	0.128349	1.82926	26.824	28.2839	90.9612	115.803
CG13950	4.8	6.5	2L	0.223471	1.82267	0.746346	0.441274	0	1.01741	0.536947	0.845768	0.165577	0.317496
CG13954	6.1	8.2	2R	0.0547408	0.4819	1.07209	1.98501	0.00413105	0	1.12648	1.17979	21.2571	16.4734
CG13957	6.6	4.7	X	4.2485	1.9734	2.05845	2.13707	5.00612	0.80094	13.0241	10.3138	20.1418	23.6689
CG13982	7.3	9.5	2L	0.125164	0.33374	0.736226	1.63462	2.97761	0.0285083	5.85838	10.7936	76.7511	142.61
CG1399	5.9	8.6	2R	2.72675	2.64508	1.82175	2.60587	4.79752	2.37556	21.8126	16.7384	34.4211	33.3799
CG13991	6.5	8.7	2R	0.00312336	32.5018	0	0.00529217	0.00297806	93.9061	0	0.008364	0.03926	0
CG13993	6.3	8.9	2L	33.1368	15.208	18.1065	15.9704	73.8362	104.629	306.571	212.347	169.412	213.274
CG13994	6.7	9.6	2L	9.87876	21.8052	8.3996	13.8703	31.1594	158.069	1482.8	1639.24	1304.96	1675.3
CG13995	6.7	9.3	2L	0.189829	1.23457	10.6489	16.193	0.00850972	0.0208917	4.21493	4.26888	39.4981	38.4576
CG14010	5.5	7.7	2L	0.0269586	0.194989	0.427198	0.753353	0.00102953	0.153538	1.07342	0.99981	8.46371	9.8766
CG1402	5.2	3.7	X	0.0168245	0.0772142	1.32118	1.43912	0.00385188	0.00112531	2.00501	3.13624	26.4874	22.726
CG14020	5.7	4.7	U	0.404838	6.42963	0.0678969	0.0223617	0	19.5447	6.37469	10.1337	3.84988	7.83819
CG14022	5.7	8.1	2L	8.5668	31.0383	5.45882	3.46573	0	3.48935	1240.08	1390.2	396.143	483.596
CG14023	5.7	8.1	2L	10.9875	3.59178	8.65315	13.6601	35.402	2.42612	14.2101	11.938	28.0182	23.1898
CG14024	6.2	8.5	2L	0.11834	0.65245	7.17452	11.9141	0.00924823	0.0436468	7.71352	4.95495	54.4538	54.7143
CG14040	6.3	8.5	2L	11.3923	9.22505	2.97192	4.41916	15.5051	9.03988	19.9406	17.4484	28.3488	37.5208
CG14042	6.3	8.5	2L	0.79286	13.7709	12.5183	25.0851	0.0218875	20.9659	8.62226	10.0892	95.3103	78.93
CG14043	6.8	8.9	2L	15.9338	24.3861	4.98717	6.0793	21.7917	84.359	21.7496	18.9793	60.3524	81.2899
CG14047	5.9	4	X	0.439711	2.78128	12.8429	22.2036	0.0114641	0.120306	5.33594	6.22194	65.2364	50.385
CG14052	5.8	4	X	0.0485734	0.47136	0.379492	0.519219	0.0471692	11.0786	0	0	0	0.504177
CG1407	6.1	7.9	2R	9.66089	6.74211	1.90594	2.39829	9.92913	9.30311	22.623	19.16	28.1426	30.8414
CG14073	6.2	4.4	3L	4.25848	2.73954	3.24932	5.19433	15.4656	6.86846	8.94724	5.89541	14.9513	11.7946
CG14082	6.5	4.7	3L	0.0247716	1.25056	1.74301	2.67571	0.0367554	0.552395	0.708016	1.13423	13.1791	9.88866
CG14085	6.7	4.7	3L	0.0161229	0.090126	0	0.0183189	0.00702245	0.00506105	0.220719	0.550817	1.04459	2.89118
CG14100	6.4	4.8	3L	9.17937	2.47378	1.25111	2.48808	15.2635	1.54838	79.1358	56.3215	45.2485	55.6468
CG14115	6.9	4	3L	0	0.0395713	0	0.0684447	0	0	3.56926	5.53574	0.35899	1.31749
CG14118	9.5	7.1	3L	0.238175	0.333461	0.0187413	0.0474879	0.0802667	0.947696	3.19207	6.00385	0	0.449861
CG14126	6.3	4.7	3L	0.219262	0.840806	0.492845	0.519531	0	0	0.640899	0.440649	8.18155	7.35457
CG14127	6.4	8.5	3L	0.00778648	0.0881278	0	0.0136302	0	0.207004	0.3289	0.136649	0.287479	0.237237
CG14130	5.9	4.3	X	3.54164	4.55433	2.94165	1.70541	2.43922	4.50446	56.6835	45.0112	28.7667	28.1386
CG14132	6.4	4.4	3L	0.278116	1.24387	1.76292	2.08662	0	0.0448605	177.706	219.65	414.431	346.807
CG14141	6.6	4.5	3L	1.51104	5.96188	10.7923	25.5435	0	0	15.2178	12.2102	92.3472	82.9786
CG14142	6.6	4.4	3L	0.211265	0.703396	0.206506	0.291916	0.00484928	0.0407667	1.55445	1.64324	9.6357	10.0273
CG1416	6.8	9.5	U	26.098	8.61112	11.0219	16.9012	84.5495	41.8398	111.615	81.7415	87.6475	95.8137
CG14168	6.1	4.5	3L	0.161362	0.618877	0.0508261	0.0130365	0	0.0935042	337.327	266.668	0.885512	0.965312
CG1418	6.7	9.2	2R	9.30436	35.133	5.05982	6.68545	15.1604	101.959	154.536	147.117	344.416	372.36
CG14182	6.8	4.5	3L	4.12004	2.81775	1.30474	2.77131	3.17837	1.07822	70.3052	69.2969	138.811	136.439
CG14183	6.8	4.6	3L	0.897086	14.01	0.321677	0.290083	0.250247	37.1198	0.387716	0.53129	0.874051	0.631789
CG14184	6.8	4.6	3L	14.8503	12.0843	24.097	24.176	45.0744	13.9207	498.422	448.048	290.331	311.666
CG14186	6.9	4.9	3L	0.484138	3.0046	12.7903	19.1567	0.0187696	0.0132398	2.56548	3.57995	35.6174	39.5541
CG14194	6.4	4.4	X	20.9335	12.3805	35.1804	35.0463	68.506	56.0548	45.516	41.7698	71.1451	65.5193
CG14195	6.5	4.6	U	0.580245	3.64455	0	0	0	1.21093	17.3772	16.4849	1.08654	2.63789
CG14196	6.5	4.6	X	1.18209	3.7034	1.32752	1.73797	0.104237	0.682537	53.1362	46.1453	33.3482	37.5989
CG14200	5.8	4	X	8.8282	9.01312	22.7335	22.6381	14.5306	3.63298	25.9051	17.2453	35.4167	25.6097
CG14207	6.4	5.1	X	7.97254	16.1032	32.9702	34.1605	21.6686	11.3005	12084.6	9046.57	5138.18	8514.48
CG14210	6.4	5.1	X	17.0041	3.36876	6.22534	4.23247	22.6911	18.9726	40.9481	36.5529	22.3231	28.3084
CG14220	6.9	4.6	X	6.39712	3.03775	3.11263	4.11912	13.9849	6.14842	24.4244	17.4534	18.1159	18.2867
CG14222	6.3	4.5	X	19.8246	5.29984	11.9407	12.0161	53.5149	7.01478	49.29	50.2295	56.8521	64.7981
CG14223	6.4	4.7	X	0.72354	1.24325	0.810044	1.59835	2.13768	1.53222	3.62173	4.26654	6.09873	6.13518
CG14230	5.3	4.4	X	16.346	1.98262	4.30345	4.06387	36.0641	2.91919	28.1645	22.3601	19.2731	34.9404
CG14231	6	4.2	X	9.98466	3.32431	1.53939	1.63483	6.6362	5.34084	21.9405	12.5758	22.2623	19.639
CG14232	6	4.2	X	11.9372	17.8906	13.2605	17.7262	23.6787	61.17	33.4529	17.5577	44.2272	45.9653
CG14234	6.4	4.6	X	0.183356	1.44901	6.28049	12.3139	0.0217472	0.295914	2.42524	2.10206	37.3356	37.9566
CG14238	5.4	8.4	3R	0.0238082	0.0844779	0	0.00888853	0	0.0406751	0.493137	0.13064	0.107659	0.112381
CG14257	6.8	7	3R	0.249694	0.13059	0.147847	0.264836	0.0265259	0.0186665	0.190528	0.784328	0.863376	1.85814
CG1427	6.8	9.1	3R	7.52963	11.4062	9.91895	19.7909	18.8203	23.0987	18.9367	11.688	22.9405	24.9033
CG14270	6.7	4.7	X	20.0819	15.2028	4.53562	7.79767	26.1722	115.46	244.116	138.559	177.628	230.301
CG14274	6.1	7.5	2L	0.139208	0.670408	3.41689	4.99034	0.00872819	0.0526349	35.1803	34.4979	286.451	304.871
CG14280	6.5	9.1	3R	0.00993758	0.6381	0.0952659	0.10738	0	0.952031	0.049052	0	0.347049	0.178944
CG14285	6.8	9.3	U	1.13794	3.71935	0.577271	0.892596	0.101221	0.0122467	108.262	125.453	46.3844	35.6962
CG14286	7.1	4.5	X	15.2988	3.01376	1.6558	1.68793	20.7909	6.73788	59.1651	36.5828	53.7047	54.1359
CG14299	6.6	8.6	3R	18.9735	3.95172	2.58148	3.45376	8.68759	1.34988	19.9574	21.6458	29.7235	30.7285
CG14301	6.3	8.7	3R	0.0301371	0.152434	0.0912065	0.209036	0.00739106	0.672036	14.3571	8.30988	15.8795	10.5529
CG14304	6.3	8.9	3R	0.445359	4.77373	0.379884	0.760233	0.00667912	0.0771713	14.9156	10.4463	12.2598	8.18585
CG14305	6.3	8.9	3R	0.119324	62.768	0	0	0.0344313	232.847	0.109529	0.347359	1.27109	0.6472
CG14312	6.2	8.6	3R	0.117147	1.42401	3.93149	3.75111	0.0279243	6.05232	13.8804	13.7835	91.8094	112.954
CG14321	7.3	4.9	U	0.28152	1.56222	2.24158	4.25953	0.0419242	0.0753183	25.0949	20.7037	84.5697	65.6552
CG14325	5.8	8.6	3R	0.00919287	0.0514109	0	0	0	0	0.106692	0.345312	0.304428	0.386987
CG14331	5.5	7.6	3R	0.019626	0.134578	0.344449	0.211761	0	0	0.940604	2.03716	8.08621	7.07391
CG1434	6.7	4.7	X	6.51662	3.26962	2.21141	2.5768	6.13074	2.90456	23.0637	24.7014	24.7412	30.9511
CG14342	6.4	8.6	2L	0.0407755	0.21789	0	0	0	0	1.7012	0.918462	6.1364	3.01645
CG14353	6.9	4.8	3L	3.46009	10.9311	1.65616	2.29437	4.60958	59.3731	22.7569	19.9375	33.023	35.7146
CG14354	6.6	8.9	3R	0	11.1164	0	0.12271	0	216.183	0	0	0.305589	0.12862
CG14355	6.3	8.6	U	0.014547	60.4538	0.0519239	0.0546289	0.00930811	560.75	0.297928	0	0.069746	0.619833
CG14367	5.3	8	3R	2.35819	11.4759	0.67564	1.27033	0.0284901	0.0114712	2.20538	3.86545	10.7651	10.4118
CG14372	5.8	7.6	3R	0.119406	0.88593	7.32046	9.50653	0.0102989	0.0860727	4.90467	4.97062	45.0039	47.057
CG14394	6.8	9	3R	0.930766	1.8087	0.0718549	0.249639	0.103359	0.0678307	55.7596	29.8662	28.2291	26.074
CG14395	6.7	9	3R	0.00310218	0.586444	0.00186218	0	0	0.625268	17.2111	18.8557	19.3506	22.4563
CG1440	6.4	4.6	X	32.3348	20.2704	7.96626	10.2811	51.1302	26.5649	304.792	251.505	399.026	369.497
CG14407	6.1	8.1	X	27.5852	40.5994	13.6923	26.6145	27.0715	66.4095	1193.04	1267.59	639.06	595.185
CG14408	6	4.4	X	6.19264	5.18085	12.8901	17.7219	11.0308	1.05361	35.424	27.6273	40.9759	43.2367
CG1441	6.5	9.4	2R	0.795131	3.34363	3.28686	6.36762	0.0257222	0.3559	55.5373	33.3561	26.2726	48.3941
CG14411	6.2	4.3	X	23.7944	14.0806	5.59647	8.71656	46.3708	23.9103	7.40522	4.89471	16.5526	17.6583
CG14414	7.2	4.3	X	5.61401	5.86809	2.6138	2.09943	3.97892	6.75572	99.044	185.4	226.298	254.978
CG1443	5.4	7.6	3R	0.787155	2.49609	2.55246	2.60605	0.0251181	0.578865	53.0093	61.7215	45.0003	49.3705
CG14431	6.6	4.2	X	0.300065	0.163753	0.477511	0.759641	0.00215901	0.0872375	1.92284	1.9462	20.5976	15.1816
CG14435	6.1	4.1	U	8.77529	3.97879	7.01534	10.5808	22.2163	4.32604	38.6989	32.0987	33.2603	54.5422
CG14439	6.9	4.8	X	1.20023	3.69034	2.07873	5.23534	0.0141041	0.4126	47.8995	48.1843	67.609	50.5904
CG1444	6.1	4.7	X	31.9717	51.146	36.1153	45.0552	35.7222	42.4531	242.029	278.625	229.748	179.338
CG14440	7.6	5.1	X	6.98773	2.67063	29.509	35.065	34.5621	1.06595	7.36001	4.15006	25.3966	25.2806
CG14441	5.4	4.1	X	0.966588	1.79293	4.13957	6.55432	1.71687	1.95369	17.4599	14.123	38.869	32.1988
CG14442	5.6	3.9	X	21.6704	5.59813	16.9301	20.6269	72.2277	1.89317	23.2514	17.6115	48.754	31.4738
CG14445	5.7	4.4	X	0.516928	2.97791	0.334379	0.494406	0	0.0411744	5.34412	5.25655	8.5157	15.3454
CG14446	5.9	4.5	X	5.6566	2.82087	20.1949	29.6988	15.4446	0.712951	15.1025	12.4725	68.4952	69.392
CG14450	6.1	4.1	3L	8.4551	3.36579	5.09986	7.73284	20.0726	8.20636	20.832	11.1695	13.7837	16.7432
CG14457	6.7	4.4	3L	0.086077	0.227888	0.0204712	0.0433192	0.00163951	0.16138	0.160699	1.37088	0.459094	0.681796
CG14464	6.6	8.9	2R	19.2447	2.56589	9.19518	10.7364	55.7474	6.18177	809.204	489.427	658.302	775.953
CG14471	6.3	7.9	2R	1.2986	0.941948	1.8855	2.39336	2.16941	2.10206	8.76835	8.71713	16.7448	15.9096
CG14476	6	4.2	X	49.0727	47.7424	49.8374	58.0451	60.7138	87.7813	63.9878	56.3219	58.2251	64.7385
CG14478	6.2	8.3	2R	18.3686	4.29044	22.7013	31.5179	89.8552	4.52363	82.086	67.0405	185.991	165.541
CG14480	6.5	9	2R	10.0434	21.5884	48.7333	46.4868	79.4439	215.585	50.547	51.3307	41.6918	50.2885
CG14483	6.9	8.5	U	21.1695	38.8732	38.3126	45.3311	20.5754	68.782	318.024	324.26	271.853	303.889
CG14509	6	8	3R	0.16492	0.974504	7.1323	11.9192	0.0115856	0.0189761	106.783	130.192	274.231	274.417
CG14512	7	8.9	3R	4.7482	1.5607	11.0361	10.0365	29.2806	5.89219	543.901	414.146	510.643	834.12
CG14515	5.4	7	3R	0.0409791	0.107133	0.016496	0.00872234	0.00981663	0	0.89892	0.628594	0.601248	0.899079
CG14521	6.5	8.7	3R	0.0154278	0.122833	0.512084	0.702089	0	0.0202791	5.88086	5.64302	34.3222	37.9505
CG14523	4.7	6.7	3R	1.31945	3.31792	2.88295	4.00649	0.308327	0.246638	16.6066	19.8884	6.63451	30.978
CG14526	5.8	7.9	3R	9.31899	10.1684	46.7598	67.2107	0.808732	1.42421	70.5635	57.5718	36.4876	31.2725
CG14528	6.4	8.2	3R	1.8006	2.98115	8.44881	11.3276	0.00756577	0.0422631	51.3084	64.001	29.6513	31.7233
CG14529	6.1	7.5	3R	0.428693	1.81947	0.656654	0.629691	0.0155441	0	3.39679	3.55935	4.46259	7.12915
CG14535	6	8.6	2L	0.0550841	0.261128	1.76167	2.81966	0.118748	0.0142545	2.76797	2.82743	12.496	11.5726
CG14538	4.7	7.4	2L	0.0138427	0.153957	0	0	0	0.00738268	0.448151	0.37456	1.10819	1.46453
CG14540	6.3	9.2	3R	0.00385626	60.8906	0.151964	0.0704124	0	159.17	0	0.680491	0.582732	0
CG14543	6.6	11	3R	12.0143	6.74613	12.2175	21.9857	35.7129	79.8466	96.5146	52.3131	26.1992	30.7232
CG14544	6.4	9.2	3R	5.73227	0.395354	0.531109	0.577798	5.33288	0.694976	35.9086	24.4078	61.2636	62.1007
CG14550	6.6	11	3R	19.4008	6.58025	10.0073	8.86039	43.1593	13.8578	115.052	102.82	73.3667	120.134
CG14562	6.8	4.8	3L	5.18011	2.26521	2.57638	4.01748	9.57307	1.64177	12.592	11.6551	35.3207	37.5816
CG1458	6.7	9.2	3R	29.8997	29.4004	20.2755	29.8923	26.9707	39.5333	477.731	654.985	784.077	801.444
CG14590	6.8	9.3	2R	0.425556	2.78043	0.471693	0.62102	0.0258947	2.89529	8.20104	8.6211	3.96377	3.57968
CG14591	6.2	8.3	2R	1.02799	6.8958	15.8297	25.9736	0	1.73228	88.535	78.7123	410.716	478.985
CG14607	6.4	8.7	3R	0.336197	1.02641	0.306129	0.393196	0	0.00918948	3.03073	5.21199	8.24551	15.9314
CG14608	6.4	8.7	3R	0.0149198	0.0744582	0.0158827	0.106606	0.00799957	0.0576475	10.8194	3.6157	17.7348	6.20232
CG14609	6.4	8.4	3R	0.0209871	18.6927	0.341998	0.388016	0	43.9607	0	0.120091	0.395524	0.398145
CG1461	6.8	4.9	X	7.06808	9.18484	42.2868	62.3708	0.0439111	0.402106	204.008	410.92	156.33	296.171
CG14613	6.9	4.7	X	14.2965	11.5458	6.86714	10.2548	35.1316	42.5348	482.487	459.343	179.294	167.479
CG14614	5.8	4.6	3R	15.6151	3.9445	15.1227	12.9187	75.7928	3.51713	27.5385	23.2827	37.1746	30.8247
CG14618	6.4	8.2	U	9.70442	2.64725	2.14186	3.00541	16.3452	1.77658	20.3573	11.6014	11.8279	16.8148
CG14619	6.3	4	X	4.71374	7.20019	7.82589	11.5117	7.32784	11.4902	95.7736	85.605	95.7312	79.5419
CG14621	6.6	4.5	X	11.8363	7.3186	4.19877	4.85072	13.7165	6.87178	82.0538	69.5965	110.002	121.377
CG14625	5.7	4.1	X	0.0454669	0.0769385	0.609325	0.570417	0.0252144	0.143986	0.050967	0.278113	0	0.087201
CG1463	6.5	4.7	X	6.60914	1.46857	4.48807	6.61118	14.6521	1.06529	75.686	57.6517	100.184	101.233
CG14636	5.1	7.5	3R	0.170454	0.31485	5.32099	7.44494	0.222698	0.789667	28.3058	2.6768	2.39327	4.09137
CG14641	6.2	8.4	3R	28.3168	15.7956	10.0154	10.1687	42.2473	58.7627	27.7716	23.4298	21.9338	28.6754
CG14646	5.7	7.4	3R	3.44508	2.34508	6.89521	8.38407	8.15401	4.896	57.9217	40.5134	53.7542	84.1158
CG14647	5.7	10	3R	17.781	6.72228	210.857	296.221	47.0635	7.52456	32.017	39.8452	48.4918	58.6808
CG14650	5.7	7.9	3R	13.8466	8.41974	18.9066	23.0911	61.8042	21.5682	19.799	12.5431	20.0681	19.3076
CG14651	5.9	7.9	2L	0.00508439	7.7429	0.75049	0.298376	0.0652547	19.4444	0	0	0	0.023865
CG14655	6.3	8.7	3R	0.983955	3.33998	2.33986	1.60396	0.099797	0.868083	18.2255	15.5363	12.789	10.6046
CG14661	5.8	7.1	3R	17.4875	19.1597	46.2558	68.7459	0.374514	1.03066	121.603	149.46	151.428	244.958
CG14669	5.3	8.7	3R	0.0725616	0.865413	2.58754	2.46532	0.0296065	0.131383	7.46342	4.79687	60.9836	50.9591
CG14683	6.4	9.1	3R	20.322	10.1304	15.8812	26.9876	56.1672	21.7946	343.132	385.945	196.407	191.405
CG14687	3.8	6.8	3R	8.7897	24.1989	127.09	148.572	2.87206	5.85719	133.006	181.171	375.8	575.695
CG14688	5.4	7.4	3R	12.5225	8.08016	14.4506	14.8368	8.14133	2.71372	240.822	250.621	186.471	172.483
CG14689	5.8	8.2	3R	0.00520966	28.074	0	0.00905947	0	136.129	0.250116	0.088798	1.16971	1.61311
CG14691	5.5	7.8	3R	0.0108769	7.4297	0	0	0	7.65032	0	0	0	0
CG14692	6.8	9.1	3R	0.172804	0.164332	0.475099	0.31522	0.0136406	0.0456483	0.027322	0.014697	0.34332	0.252019
CG14701	7	10	3R	5.89168	2.3645	1.12078	3.33596	3.4507	1.51016	570.498	361.772	305.179	296.575
CG14711	5.8	8	3R	13.8191	5.70883	3.88948	6.25821	40.6783	21.2381	195.856	116.636	155.011	261.226
CG14712	6.4	8.8	3R	15.523	16.7253	2.58036	4.30662	49.6016	46.9255	14.7443	9.82167	14.9778	16.1569
CG14722	6.9	9.1	3R	16.4965	9.38871	12.9369	14.2979	39.3994	24.9916	70.4508	62.2603	80.2141	84.0548
CG14740	6.4	4.7	U	0	44.6462	0	0.0617809	0	99.6804	0	0	0	0.351748
CG14741	6.2	4.5	3R	0.297654	1.65074	2.34232	4.35339	0.160635	0.790366	20.4725	17.9624	59.7501	54.1398
CG14749	6.8	9.2	2R	15.3487	7.24375	2.58499	4.73015	29.0966	15.24	42.5235	28.6169	36.9121	39.9554
CG14757	6.4	8.7	2R	6.67084	49.1778	12.5069	21.7315	3.09973	119.968	481.494	516.686	386.806	471.812
CG14760	6.3	9.1	2R	0	0.0155155	0	0	0	0	0.306574	0.121449	1.12588	2.0521
CG14762	7.6	8.4	2R	4.917	13.6109	157.615	230.639	0.311882	0.744729	51.1781	46.8454	262.335	264.683
CG14764	6.3	8.6	2R	1.55251	5.84863	3.50339	4.46511	19.1695	0.851788	44.0234	46.3797	56.8568	75.5981
CG14767	5.9	7.9	2R	16.3537	20.0551	19.5607	34.8999	18.674	8.61596	359.446	370.659	573.295	829.865
CG14770	5.7	4.1	X	0.0481875	0.132753	0.141407	0.69494	0.141443	0.671882	0.544165	0.588791	1.52605	1.4041
CG14777	6.5	4.4	X	5.73838	16.2822	7.89065	12.6531	0.870618	2.03055	91.7738	95.6575	87.7327	84.2372
CG14778	6.5	4.4	X	3.74037	13.2635	3.10546	4.77928	0.257751	0.958701	157.674	115.781	17.7508	16.3828
CG14780	6.5	4.4	X	0.423694	0.609669	0	0.117244	0	0.150316	31.0176	26.0259	31.5383	23.1243
CG14786	5.5	5.6	X	8.6538	7.36624	3.04136	4.11674	5.60133	6.02729	61.9479	49.3077	44.5526	47.1757
CG14803	6.3	4.8	X	9.86622	1.65227	0.424238	0.744857	12.983	1.96427	10.5483	6.60155	10.1042	10.2761
CG14805	6.5	4.6	X	19.6124	6.98035	10.1287	10.4512	49.0908	8.96727	18.3763	11.9262	12.475	12.8592
CG14814	7.3	5	X	47.6126	2.72239	0.972485	1.60834	206.301	7.98743	12.5641	7.14537	11.2269	11.5555
CG14817	6.4	4.6	X	26.3667	19.4049	22.093	27.5448	47.5827	49.8633	1267.3	1001.7	645.08	947.843
CG14820	6.1	8.7	U	2.34919	3.09447	0.0875054	0	0	0.376144	0.67473	0.102581	0.528647	0
CG14830	5.7	4.7	3L	0.451945	1.49858	1.05486	1.36308	0.0968705	0.261419	36.3075	36.9548	55.9539	71.4082
CG14838	6.1	4.4	U	0	4.39579	0	0.0191514	0.0128647	20.2491	0.04911	0.017136	0.188689	0.246101
CG14853	6.4	8.8	3R	0.13557	0.926551	6.8499	18.1206	0.00529168	0.0095125	14.5975	26.3221	176.107	253.728
CG1486	6.7	4.3	X	12.0115	11.9086	6.90789	9.79162	15.2623	10.4317	24.5905	15.8837	35.8888	34.7173
CG14866	6.5	9	3R	0.0525639	0.0517261	0	0.00799152	0.00923081	0	2.13893	2.27655	4.30239	9.10203
CG14868	6.6	8.9	3R	1.10513	10.1108	11.2145	16.3327	1.37434	52.496	12.2453	12.1206	34.1253	45.6662
CG14869	5.6	7.9	3R	0.745849	0.959706	0.722385	0.64921	0.315737	0.14672	8.58027	7.02709	13.9487	15.2528
CG14877	6.7	8.3	3R	0.121982	0.23459	0.0240749	0.0639338	0	0.0136578	0.154116	0	0.53953	1.10329
CG14880	6.7	9.2	3R	0.278543	1.57551	2.98384	4.67864	0.00728041	1.95108	7.26555	6.2987	2.40443	1.52578
CG14881	6.3	8.9	3R	8.32425	2.02756	0.722042	1.81996	6.08645	1.32994	61.5055	42.2962	92.8749	93.8276
CG14883	7.1	9.8	3R	11.3935	2.3457	6.59813	10.4826	56.6612	1.53592	44.8997	38.0001	69.7224	97.8616
CG14892	6.9	9.6	3R	0.479845	1.90474	0.138538	0.191675	0	0.0573956	0.455708	0.087554	0.496055	0.151176
CG14894	6.3	8.9	3R	24.1848	21.5596	14.4645	20.1667	79.7039	97.2722	75.1835	50.9124	73.0185	80.6993
CG14898	6.2	8.7	3R	9.49316	7.19191	4.12425	6.20927	14.1213	15.9907	100.973	72.0619	71.1959	132.935
CG14903	6.6	9	3R	8.57612	4.03192	4.37685	6.88221	12.1299	11.1907	214.074	163.656	129.201	138.823
CG14905	6.5	4.5	3L	0.0216854	0.131598	0.148333	0.0532147	0.0252288	0.0681038	3.70165	6.35571	3.05224	18.4881
CG14906	6.4	7.9	3R	4.88324	2.50993	1.38373	1.95316	7.50056	2.9641	4.68512	1.22524	3.59288	6.58258
CG14921	5.9	8.2	2L	0.239428	13.4868	0.0580037	0.119032	0.32729	72.6032	0.843575	0.703554	4.66102	3.47876
CG14945	6.3	8.2	2L	2.74396	4.52391	5.87223	11.4696	0.114643	1.48174	20.9401	25.9183	33.6077	33.8861
CG14946	5.7	8.7	2L	0.363501	0.853914	3.18259	5.00815	0.166406	3.00646	166.215	186.948	191.495	196.87
CG14949	6.6	4.5	3L	7.44042	12.043	0.0743034	0.0846228	0.167629	1.71611	248.701	170.876	64.6484	54.3274
CG14950	6.7	4.1	3L	0.386329	2.59124	6.83596	10.1455	0	0.194158	4.35442	4.10901	53.5207	47.4734
CG14960	6.5	4.6	3L	0	0.00104154	0	0	0	0.00942159	8.81288	12.5966	10.4319	7.6223
CG14961	6.7	4.4	3L	0.120508	0.195623	0.144715	0.0936015	0.0972965	0	0.036307	0.057833	0.126228	0.078706
CG14964	6.4	4.6	3L	0.961497	5.64235	4.7605	4.39079	0.266647	0.102676	33.0361	26.2761	14.6933	8.67364
CG14966	6.5	4.6	3L	9.49534	4.40341	1.02545	1.31626	5.94906	6.60997	62.105	52.0762	44.6134	71.3671
CG14967	6.8	4.6	3L	9.19065	5.23252	3.05056	4.07281	20.6997	6.74086	20.6329	19.9596	62.6074	66.4575
CG14968	6.2	4.3	3L	1.15795	9.71516	0.117477	0.140022	0.0200526	6.98879	63.4358	85.3147	8.69633	7.68719
CG14971	6.8	4.8	3L	6.90986	4.79098	2.71255	4.62988	11.1139	7.91585	28.1779	23.3549	35.275	30.4177
CG14977	7.1	4.7	3L	22.1625	19.2194	35.3365	39.0984	38.6284	34.3315	835.94	807.606	301.204	438.609
CG14980	7.1	4.7	3L	5.63351	5.39916	2.32831	3.63063	3.58221	5.02713	79.8402	76.6523	91.2007	105.529
CG14982	6.4	4.9	3L	0.19057	2.13212	5.95399	12.0436	0.0153723	0.635911	2.52211	3.21897	28.3167	21.5564
CG14985	6.5	4.4	3L	2.48671	0.855357	0.965684	1.43283	6.31656	1.41675	474.668	226.138	561.898	347.189
CG14995	6.6	4.8	3L	1.8412	62.0712	10.3128	11.7507	5.0393	188.475	700.608	372.162	669.447	727.505
CG14997	6.5	4.7	3L	4.89092	10.0209	3.02551	4.03543	6.35614	19.9713	462.6	441.864	202.983	242.81
CG15011	6.6	4.5	3L	7.24664	3.3206	1.81224	2.60739	14.8461	5.19729	20.6272	15.4277	26.0142	26.2282
CG15012	6.9	4.8	3L	22.4381	20.1331	14.9188	25.0005	21.3471	32.1451	177.666	146.958	253.725	257.671
CG15020	6.1	4.5	3L	0.00349551	0.0421576	0.00593742	0.0686571	0	0.00145338	1.99761	3.58814	5.71413	8.80181
CG15027	6.2	4.6	X	12.9399	4.82594	8.49286	5.64159	12.4501	10.1707	84.805	44.222	63.4956	71.3385
CG15035	6.7	8	X	0.0233998	13.1533	0	0.0153097	0	26.4422	0	0	0.348665	0
CG1504	6	4.5	X	0.00427678	0.32137	0.163674	0.221421	0	0.0688909	0.275831	0.681818	6.28723	6.54622
CG15073	6.4	8.8	2R	5.16962	3.85874	0.675244	1.26595	2.15224	2.69511	10.1902	8.96855	14.3371	17.9773
CG15080	6.2	8.9	2R	0.0564085	0.0719318	0.294442	0.28145	0.0399354	0.0836799	11.6502	9.24616	12.7469	5.79783
CG15084	6.5	8.8	2R	5.07529	2.9663	1.34231	1.95687	4.782	5.37628	14.9952	10.1647	13.888	20.8538
CG15087	6.1	8.7	U	6.29038	3.96431	3.24973	7.12196	16.919	16.652	11.6939	9.91751	19.0704	24.6123
CG15093	4.8	7.5	2R	66.329	49.9648	38.3215	43.2106	53.8168	16.9653	661.125	687.347	277.388	384.999
CG15096	6.1	8.1	2R	9.80887	22.5263	20.6755	39.9172	0.279238	5.06761	35.5775	65.0284	35.1512	60.8609
CG15097	6.3	8.6	2R	0.238089	2.40002	1.43067	2.89093	0.0491959	0.391195	14.21	15.5744	26.3599	23.1957
CG15099	6.5	8.9	2R	11.6937	7.17951	6.36851	9.79245	20.214	5.68756	30.8972	31.6559	63.0863	62.6504
CG15100	6.5	8.8	2R	21.7643	14.8311	3.50734	5.27496	29.5696	32.9665	17.9961	15.0853	18.3392	24.2852
CG15111	6.3	7.9	2R	7.3833	15.1305	6.36531	9.1183	10.2183	43.7515	52.9497	38.1072	97.0087	110.715
CG15117	6.5	9.1	2R	0.457116	9.50169	0.891111	1.78957	0.386935	8.49659	23.8683	24.719	35.9369	48.0359
CG15118	6.4	9.2	2R	7.45484	10.6837	6.76137	9.63442	4.84929	10.5029	26.6242	25.4896	81.4109	105.005
CG15120	6.2	8.8	2R	0.344853	0.711325	0.0182566	0.433509	0.0789702	0.0651932	1.28977	1.76782	8.17355	6.62093
CG15128	6.3	4.6	X	0	44.2789	0.00345555	0.0355541	0	81.7418	0.144778	0.050182	0.257811	0.218247
CG1513	5.6	8	2R	12.5493	42.3032	21.2772	25.363	12.0851	3.85091	69.6641	66.4348	216.031	204.877
CG15130	6.2	9	2L	0.0213342	0.0873801	0.0021706	0.131948	0.0259139	0.00140818	1.47164	1.56478	3.82939	3.44381
CG15145	6.3	8.7	2L	0.00287525	5.67034	0.00664787	0.046987	0	6.83648	0.373568	0.602616	3.86413	3.53265
CG1516	6.8	9.2	2R	11.4172	16.7817	18.7783	29.7106	11.3042	13.7774	405.076	648.076	305.514	342.625
CG15160	6.5	8.9	2L	7.46146	2.07248	2.39294	4.197	19.3202	3.00187	9.50428	5.83354	14.5951	14.0893
CG15161	6.9	8.3	2L	0.025069	0.15572	0.323927	0.294654	0	0.0393182	1.37414	0.978845	4.42481	6.85221
CG15168	5.4	8.2	2L	25.1351	12.6786	14.9543	15.232	55.1485	24.8637	173.84	150.79	116.45	155.769
CG1518	6.5	4.3	X	35.0712	5.83587	7.31971	9.96777	53.2126	7.88198	34.8238	25.7409	38.2007	41.1084
CG15186	6.2	7.9	3R	0.153665	0.773917	1.81372	2.21284	0.0518571	0.227181	8.54476	12.9402	35.5744	36.1622
CG15207	6.3	4.5	X	0.227982	1.18167	6.21299	9.79473	0.147944	0.0399401	5.36058	7.49435	40.4117	43.5991
CG15211	6.6	4.7	X	0.891688	2.17841	1.90941	2.36707	0.0755446	1.26985	141.825	131.741	168.101	136.328
CG1523	6	9	3R	10.6977	5.48248	4.4045	7.12565	17.134	9.09581	15.0665	12.3069	25.162	25.2468
CG15236	6.9	8.9	2R	0.318886	1.76661	12.7646	21.948	0.0181335	0.448276	5.56175	6.69216	95.3398	89.5036
CG15239	5.5	4.6	X	0.00414149	0.230041	0.0250848	0.00120561	0	0.0836311	5.10793	4.25561	0.541898	1.81889
CG15249	6.2	4.3	X	0.0044901	0.00569302	0	0.00390408	0.00142707	0.00417296	6.98996	10.3479	4.02603	7.24821
CG15252	6.1	4.5	X	0.00367949	0.0164003	0.00567157	0.00639854	0	0	0	0	0.119824	0.247708
CG15269	4.1	5.4	2L	0	0.00598685	0	0.00408757	0	0	0.076301	0	0	0.270424
CG15270	5.4	7.7	2L	0.0780648	0.463446	2.16949	4.29623	0.0056365	0.0721521	4.28351	3.73541	31.4167	32.9147
CG15279	6.7	9	2R	1.39865	2.76896	1.39645	1.39965	0.741749	0.759635	67.0584	36.1058	2.93947	1.99902
CG15283	6.9	9.6	2L	0	17.5396	0	0	0	153.952	683.323	702.406	489.291	695.896
CG15309	5.7	4.1	X	2.22698	2.19337	15.8048	16.5044	16.2462	13.2931	22.7667	28.459	73.9616	122.396
CG15311	5.7	4.1	X	0.0581954	0.308473	2.73823	4.16892	0.00599026	0.100303	1.49318	2.65092	24.6182	27.7002
CG15312	6	5.1	X	1.96663	0.533861	4.43365	6.39662	5.9642	0.0486101	7.6826	7.66626	31.0708	48.2735
CG1532	6.1	4.4	X	21.4925	13.2255	2.61911	3.42512	14.3511	11.1183	94.7761	71.5073	94.4837	90.2984
CG15356	7.2	9.3	2L	11.7592	2.33994	4.24882	6.79443	27.8243	0.452405	22.5968	11.7954	17.2219	19.5226
CG15365	5.9	4.1	X	0.223113	0.530173	0.119952	0.232639	0.21728	0.0992987	17.8229	14.471	22.804	22.9484
CG1537	6	4.4	X	0.407674	1.21563	3.87408	6.76001	0	0	48.3382	59.6759	205.39	390.408
CG15373	6.4	4.2	X	0	0.171015	0	0.0115707	0	1.12077	0.48373	0.488534	3.24532	3.79981
CG15385	6.4	9	2L	1.43131	3.98312	3.15528	4.20262	0.0693955	0.453179	0.927603	1.26055	10.7945	13.0205
CG15387	6.7	4.6	X	13.3374	10.8976	0.14515	0.486989	5.8988	2.29133	37.4628	28.0525	14.2034	18.0641
CG15390	7	9.6	2L	3.32473	1.19009	3.80767	3.20876	13.9155	1.32483	44.6946	44.341	43.5272	56.4949
CG15412	6.9	9.3	2L	3.37592	12.2694	4.621	3.12867	0.0781318	1.02355	75.3285	76.7557	62.9909	60.4769
CG15414	5.3	6.7	2L	0.0243663	0.0706967	0.205943	0.172353	0	0.00469812	12.2543	14.4091	8.1667	9.1905
CG1542	5.9	8.3	3R	27.9045	9.53641	10.846	10.7806	60.6029	76.635	52.5937	26.4379	28.4791	29.4689
CG15429	5.7	8.1	2L	0	7.41787	0	0	0	86.4434	0.226207	0.234425	0	0
CG15431	6.2	8.4	2L	0.117787	0.992564	0.681737	1.31462	0.0319656	0.0435722	5.79246	5.17596	41.1409	31.5209
CG15432	6.9	4.9	U	7.10503	6.38478	16.9846	27.0312	21.5403	39.0106	3887.93	3957.64	2098.94	1967.97
CG15435	6.1	8.6	2L	8.67429	4.53012	2.21952	2.5646	24.9273	35.7602	4.86299	5.24894	8.69914	8.42791
CG15439	6	9.4	2L	8.88398	1.88609	2.698	2.95752	26.628	3.73133	3.91282	1.53487	3.13948	2.60004
CG1544	6.1	7.8	3R	0.873956	1.50029	1.18588	1.99155	0.0348242	0.556368	54.2668	61.6741	20.8572	27.2897
CG15440	6.6	4.7	3L	7.06967	12.8474	6.1516	7.40241	11.3825	49.0603	70.7679	50.5042	72.4177	95.4568
CG15445	6.9	4.7	X	8.08201	9.09187	3.48517	4.29865	14.9098	26.4427	42.1325	29.2735	29.2486	35.062
CG15449	6.8	4.8	X	0.64699	1.19028	1.09323	1.3666	0.0155368	1.47345	4.13814	5.52622	37.1682	33.0442
CG1545	6.1	3.8	X	0.211307	0.846042	4.27241	8.5462	0	0	27.9701	23.3197	157.657	175.573
CG15464	5.7	4.2	X	0.097923	0.750418	3.18464	3.23233	0	0	2.67029	5.60133	53.6852	73.5905
CG15465	5.7	4.2	X	0.0688457	0.338778	2.10466	4.22061	0.00605667	0	2.63607	3.71584	35.8318	34.7316
CG15478	7	4.6	X	0.0352876	0.168167	0.499952	0.892976	0	0	3.14423	3.45693	25.5396	23.0228
CG15479	6.5	9.3	2L	0.0102086	0.0591093	1.39983	0.761774	0	0	0	0	0	0
CG15485	5	6.8	2L	0.00346068	0.204962	0	0	0	0.012772	0	0	0	0.103659
CG15497	6.3	8.8	3R	0.293514	1.02815	0.187537	0.153352	0	0.0393028	1.89529	1.70345	3.69693	2.50358
CG1550	6.9	9.5	2R	12.5489	6.90117	6.70844	8.18534	12.3447	8.97193	17.5719	11.5593	13.6305	16.7263
CG15506	6.8	9.3	3R	0.0762562	1.54511	0.185735	0.956346	0.00441893	22.2235	53.2365	58.7362	43.3152	28.5532
CG15515	3.4	3.7	3R	0.519651	2.82956	0.777212	1.57114	0	0.0600826	2.25785	0	38.7107	29.6206
CG1552	5.6	4.6	X	2.00336	9.55064	31.8702	40.8361	0.014375	0.406181	66.7649	71.6595	246.106	292.08
CG15522	5.8	7.4	3R	0.324438	1.4183	3.13495	5.99664	0.00540589	0	26.2118	17.6963	96.3549	97.7567
CG15523	6.5	9.3	3R	2.75613	16.5235	0.862107	1.56835	5.56074	13.3046	7.30457	7.01809	16.5201	17.7206
CG15525	10	14	3R	7.39111	6.0106	4.98846	7.18324	28.2202	35.1186	219.441	186.513	131.106	216.62
CG15528	6.6	4.6	3R	0.567928	3.69836	0.381796	1.49965	0.0236819	0.0285107	26.2895	27.9692	23.1343	30.9239
CG15531	6.6	9.4	3R	16.2589	52.7594	0.0571501	0.260092	0.201153	2.27457	365.55	599.657	1.53413	2.01037
CG15533	5.9	8	3R	3.72727	5.00129	0.00343799	0.0353734	0	6.40719	71.6383	86.9732	45.0001	53.2807
CG15535	6.8	4.7	3R	6.43846	1.67034	15.0497	15.0794	36.9012	19.7216	249.141	193.866	335.035	220.756
CG15537	5.9	8	3R	0.0998679	0.730317	1.21711	1.71832	0.00303413	0	6.62337	9.05813	33.5	27.5891
CG15539	5.9	8.5	3R	0	5.98245	0.219028	0.126501	0	2.19218	2.66898	21.4233	2.23912	0.638022
CG15544	5.5	7.8	3R	0.0345795	0.177133	0.336163	0.443782	0.0170439	0.016439	9.43785	8.19859	19.2841	12.7599
CG15546	6.6	8.7	3R	1.65637	7.72592	5.17941	5.14856	0	0.0259927	36.0217	34.559	23.7685	44.2567
CG15553	5.9	8.4	3R	1.1122	1.59417	0.260055	0.202112	0	0.588525	12.0198	18.2298	22.3991	20.6843
CG15561	5.9	8.3	3R	6.27716	1.7369	4.57364	3.39777	13.1825	3.43078	26.3906	13.9938	16.1534	23.2079
CG15564	5.6	8.3	3R	0.00651306	0.0457552	0.0205408	0.116237	0.0093151	0	0	0.269114	3.01843	2.39044
CG15594	6.6	8.7	3R	0	0.0117045	0.0741159	0.0114378	0	0	2.09299	0	8.48546	3.87316
CG15597	6.1	4.1	3R	0	1.27111	0	0.259419	0	0.166372	88.9704	40.8251	0	0
CG15602	6.1	4.5	U	7.14518	5.24529	10.4205	12.5923	26.9347	15.7864	20.5449	17.0792	27.7209	24.0511
CG15611	6.9	9.2	2R	1.68829	4.03256	2.22039	3.36022	0.609971	2.22185	56.7418	53.0771	41.9686	44.7994
CG15615	6.4	8.2	2R	0.0419527	0.134843	0.0453141	0.0356299	0.010025	0.157709	1.64043	1.40238	0.293545	0.975522
CG15617	6.6	9.1	3R	2.89723	22.5947	0.0115463	0	0	0.0221315	345.289	376.197	0.833954	0.523014
CG15618	6.9	4.7	X	3.88391	1.51777	0.932984	0.907369	1.81781	1.12515	3.94532	3.92322	9.15193	12.3019
CG15625	5.7	4	2L	0.012591	18.0337	0.000861856	0.0642825	0	96.5436	0	0	0.914177	0.22177
CG15626	5.2	8.3	U	11.3358	11.0864	7.51886	6.73917	16.7851	9.53425	56.5993	50.8911	34.0641	37.4395
CG15628	5.8	7.6	2L	2.19901	14.6372	18.2686	38.8802	0.0638802	0.0889996	26.8502	29.7206	157.745	195.981
CG15629	6	8	2L	0.96933	2.14673	2.49958	3.86597	0.0920804	0.00156518	41.1472	24.5574	41.1731	34.7895
CG15630	5.3	7	2L	0.0303709	0.634366	0.508623	0.724943	0	0.0197161	29.2316	39.4061	241.603	306.593
CG15643	6.1	4.5	X	3.33465	1.34483	0.573131	1.15139	2.31544	0.128723	14.7824	6.77893	11.5142	10.9171
CG15650	6.9	9.2	2R	0.120919	0.287731	0.0102732	0.0251669	0	0	22.6265	19.7272	47.968	61.7388
CG15651	6.1	7.8	2R	0.201713	2.05008	3.74798	6.86801	0.00621474	0	1.97059	1.68545	16.1242	16.8152
CG15661	6.8	8.4	2R	0.802714	1.37613	7.24086	7.2048	0.219572	0.0512913	55.6113	64.4767	57.4974	87.1474
CG15666	6.7	9.5	2R	0.0831379	0.33114	0.0874268	0.506826	0	0	3.08242	3.24698	29.1815	24.0242
CG15674	21	23	2R	2.04313	2.29515	0	0	0.0432077	1.89113	0.570349	1.47548	0.822882	1.06186
CG15696	5.5	8.6	3R	0.0800562	0.0819104	0	0	0	0.0446533	0	0.281644	0.431409	0
CG15701	6.8	9.1	2R	0.513015	0.920755	0.493189	0.74253	0.179625	0.219336	1.81689	1.68972	5.1332	4.84389
CG15706	6.1	7.9	2R	2.30371	2.94682	0.722622	1.48894	1.81292	0.820787	65.18	33.1255	38.7157	33.9172
CG1571	6	11	U	0.0142876	11.5483	0	0.0732673	0	27.8926	0.358962	0.754048	0.177269	0.420682
CG1572	6.4	5	X	4.53059	9.62786	27.2153	30.7952	5.3055	22.7268	139.551	71.3656	51.0436	48.9465
CG15725	6.7	4.5	X	0.133524	0.404765	0.69481	0.669323	0	0	1.16206	0.754091	3.00409	2.8857
CG15729	6	3.8	X	0.0413358	0.288831	0.250646	0.518111	0.0139051	0	2.44218	2.84	21.0797	17.5387
CG15735	6.6	4.5	X	27.1926	7.01183	18.5157	25.7968	68.9603	9.86895	109.388	89.9235	122.778	114.567
CG15738	6.8	4.9	X	8.15663	6.01524	4.51362	3.79839	13.3803	20.3262	82.0806	68.6835	58.2375	51.0495
CG15740	6.5	4.6	3L	0	0.0176862	0.00692199	0	0	0.0182021	2.78497	7.4137	11.3606	18.7101
CG15743	6.4	4.9	X	14.246	5.90888	1.76059	2.62682	12.6139	4.96562	78.4056	57.3834	80.2463	79.1008
CG15744	6.4	4.6	X	8.49395	2.18548	2.04531	3.23413	14.0307	5.19241	4.19465	1.73558	6.93653	7.16236
CG15745	6.5	4.4	X	7.00912	9.55128	5.31239	9.4514	0.56928	2.15507	282.089	289.911	312.071	211.389
CG15747	6.4	4.7	X	4.07331	1.9651	7.191	7.87501	13.9109	5.95357	32.5339	20.1156	26.4633	19.8508
CG1575	6.5	4.6	X	15.6822	2.01828	1.42718	1.39693	14.702	0.771725	12.9634	6.77369	8.43128	10.5308
CG15753	6.3	4.7	X	0.130546	0.525955	0.27324	0.416264	0.00547523	0.0378319	10.0054	8.81832	32.063	31.1475
CG15760	6.5	4.7	2L	0.107908	0.84182	5.33595	7.15754	0.0272785	0.954473	1.5204	1.1998	15.6641	12.829
CG15765	5.6	4.3	X	0.297879	1.85153	26.8969	37.0221	0.0354917	0.0525591	13.2179	12.043	135.801	98.6847
CG15772	6.2	4.6	X	0.968238	3.50412	17.0667	38.8823	0.0330476	1.01056	513.009	347.463	1859.11	2502.47
CG1578	6.6	4.6	X	19.2286	5.4559	10.368	12.5292	29.8533	1.25334	33.8607	27.9458	40.5378	51.905
CG15803	7.1	9.6	3R	0.0344886	0.242491	1.18355	1.6901	0.00297305	0.0681128	4.35348	5.88929	38.2309	43.8044
CG15814	6.3	4.6	X	19.1606	11.7583	10.9629	20.1922	36.4996	24.7126	22.278	20.2089	29.4607	31.1045
CG15817	6.4	8.2	3R	15.9404	6.66186	6.87289	10.8427	40.4561	13.3914	19.464	16.3647	72.3193	75.3572
CG1582	6.7	4.6	X	14.253	10.7238	3.28144	4.47572	17.6066	16.0663	16.3179	11.7135	17.4173	16.9115
CG15822	6.6	4.4	3L	0.637593	0.92674	0.589619	0.649245	0.942358	1.5148	7.26298	6.30026	14.6741	13.1029
CG15824	7.1	8.9	2L	0.0173366	9.10041	0.000959791	0.0433126	0	22.0487	0.194085	0.048621	0.162256	0.447778
CG15828	6.8	9.3	2L	4.7489	3.68329	15.2412	13.4941	0.0956068	0.0806745	24.6383	20.9536	16.185	17.3642
CG15831	7.4	9.9	3R	0.00533485	0.00681937	1.25574	1.94992	3.31459	13.0698	7.20175	6.04677	18.331	20.6248
CG15863	6.7	9	2R	5.26128	1.92211	3.27113	2.90429	15.7566	8.43941	21.4016	27.2415	17.0936	29.8776
CG15881	6.4	4.8	3L	9.05291	2.48677	1.28982	2.24408	9.87595	2.3749	180.505	98.0097	131.121	112.94
CG15887	6.2	8.1	3R	0.0496141	0.191451	0.178046	0.15246	0	0	3.4563	2.08986	3.33293	0.838255
CG15888	6.2	8.1	3R	0	0.0139655	0.141789	0	0	0	1.30182	1.03413	0.236495	0.783145
CG15890	6.6	4.6	U	0.516675	0.561738	1.20179	1.52889	0.116797	0.881343	41.8119	38.2872	143.034	142.607
CG15892	6.3	4.4	X	0.412899	79.7398	0.475958	0.658229	0.00662839	268.512	16.6956	14.439	24.091	24.7704
CG15894	6.4	4.5	X	0.12301	0.690293	2.4153	4.12053	0.00140619	0.00364813	1.59466	1.69869	15.4623	12.9905
CG15896	6.3	4.4	X	7.59959	2.96129	0.915472	1.48046	5.41516	4.07377	72.7506	43.288	102.49	91.1877
CG15908	7.2	9	2R	6.843	3.09938	12.6567	17.4931	28.5357	15.479	166.461	146.304	80.2258	109.004
CG15914	6.1	4.5	U	2.62724	1.06096	0.251249	1.26837	5.78643	2.33196	22.2985	19.3376	27.8132	28.6737
CG1597	6.7	4.7	X	14.8973	9.47537	3.54408	5.60075	10.2608	16.6364	34.399	28.7576	41.5562	48.0166
CG1598	6.9	9.2	2R	27.0201	26.0402	12.284	20.2915	35.0712	60.967	81.7919	76.8815	70.288	79.3269
CG1599	6.7	4.9	2R	28.2512	17.0641	22.2797	31.951	49.7297	36.5961	151.692	127.384	161.775	163.089
CG1600	6.6	8.9	2R	2.81312	7.1479	15.6052	19.7152	1.13081	0.828507	31.8818	17.8938	119.886	100.77
CG1602	6.8	9.4	2R	3.52949	1.60487	1.36363	1.26074	8.67093	2.21935	8.90704	6.52741	12.716	16.2808
CG1607	3.9	6.5	3R	0.700289	1.98156	6.04612	10.0617	0.0585004	0.095845	189.059	158.553	123.792	125.874
CG1620	6.8	9.4	2R	32.454	11.3104	7.8769	10.9779	64.9719	26.5691	18.8932	10.435	18.137	18.6751
CG1622	6.2	4.2	X	18.8398	2.77535	13.7128	13.7638	138.303	11.8887	17.9127	10.2772	22.8021	21.0538
CG1628	6.7	4.8	X	2.63239	6.38933	8.72254	11.094	3.39169	53.8608	48.1219	38.4375	21.6441	24.081
CG1632	6	4.7	X	0.804913	0.3725	1.4339	1.46884	0.0181263	0.275063	15.2671	10.4632	29.3197	27.9913
CG1635	6.1	8.4	3R	8.7745	6.6659	7.16761	11.398	9.599	1.6842	130.628	117.175	101.645	129.602
CG1636	6	4.5	X	10.6056	9.64589	9.70631	11.6302	19.9624	3.09705	151.794	145.539	246.553	196.164
CG1637	6.4	4.5	X	14.4049	14.0475	9.34447	12.89	14.0646	12.0423	35.1219	45.3462	37.8406	39.1224
CG1640	6.5	4.7	X	13.9733	17.8759	9.7437	16.8453	8.3437	13.067	1931.02	2492.33	1218.78	1249.97
CG1646	6	9	3R	10.6057	8.77256	18.8288	27.5542	17.5236	16.5888	28.2813	20.8877	40.1965	40.1467
CG1647	6	9	3R	4.21608	2.07176	5.20749	8.36792	21.7984	2.9141	7.63995	4.94151	8.31334	8.72686
CG1657	6.7	4.7	X	12.2492	6.68277	6.44901	11.6681	16.1043	2.2205	14.0474	12.7333	22.9146	30.4205
CG1662	5.9	4.5	X	18.7234	21.2913	16.8651	20.5883	52.1169	126.906	127.078	80.9243	61.9881	63.1019
CG1665	6.7	4.9	2R	15.4849	6.74086	1.20887	2.43447	10.6504	1.29453	70.5085	88.5318	37.506	43.9331
CG16700	6.2	4.2	X	2.37205	2.29293	4.00004	6.32627	6.59209	0.211157	72.2988	76.5022	285.08	307.352
CG1671	6.2	7.8	2L	15.1354	2.33681	2.47897	2.17522	13.8666	1.05037	11.1017	6.97476	13.4838	19.1546
CG16711	6.9	4.6	3L	7.04494	12.5654	12.4099	22.351	22.9551	24.8002	9.26611	6.32886	15.2422	14.2142
CG16717	6	4.4	3L	9.67139	4.27898	1.62088	2.50002	10.7242	3.39961	12.511	8.08808	26.4157	25.6961
CG16718	6.6	9.2	3R	3.6161	1.64693	1.85714	3.13929	3.51412	0.42306	28.1176	35.2886	34.5503	37.3209
CG16721	6.1	7.8	U	9.92747	25.7054	32.7259	42.0731	25.467	159.261	1.00929	1.48526	2.0061	5.21922
CG16727	6.4	9.1	3R	1.87133	3.69549	0.0110292	0.0123616	0.122358	13.1469	11.9019	20.7092	0.678105	0.506122
CG1673	6.1	4.1	X	7.49139	13.657	16.9017	36.9216	6.44715	2.31334	420.741	591.714	471.933	661.151
CG16739	6.2	8.4	2R	0.0100218	43.9314	0.800229	1.51018	0.0286668	355.41	0	1.2134	0.881522	2.02623
CG1674	6.8	4.9	4	1.41913	5.68614	4.18011	4.07295	0.184004	0.543039	1353.68	1939.3	908.74	1063.87
CG16758	5.8	3.7	3L	4.19277	55.4787	29.6817	120.163	0.272673	195.934	1313.17	1906.93	588.952	900.628
CG1677	6.4	4.4	X	2.53482	1.91645	2.37467	3.21954	6.74391	2.41675	51.4403	38.342	59.2848	42.7349
CG16771	6.1	4.6	U	2.7516	3.35706	3.33525	5.1809	1.62014	2.15006	36.5475	29.1547	4.34192	4.68715
CG16778	6.5	9	2R	0.0444977	0.236078	1.04337	2.0143	0.00431495	0.447888	0.406423	0.698763	3.72164	3.90194
CG16779	5.6	8.2	3R	0.119497	1.14231	1.80025	3.70238	0.00855809	0.929638	8.08591	11.391	37.3862	34.602
CG16786	6.8	8.3	2R	0.0785906	0.531302	3.93865	4.96571	0.0253929	3.14133	51.4347	40.7564	47.4128	32.3312
CG16787	6.9	9.4	2R	10.2684	9.58158	2.6603	3.69995	8.27191	15.3313	66.6023	58.8197	47.8091	53.2721
CG16789	6.5	9.1	3R	0.194347	0.858391	1.27721	1.58012	0.114859	0.353323	0.057256	0.079541	0.345635	0.329261
CG16791	6.5	9	3R	0.443872	1.80445	8.68182	13.7289	0.210167	0.607319	26.6937	28.227	125.28	108.861
CG16798	6.5	8.1	2L	0.0519409	0.145055	0.236914	0.872851	0.0201941	0.172566	4.95166	2.55291	2.29522	0.868361
CG16800	5.8	6.8	2L	0.00833546	0.0886225	0.0524075	0.050733	0	1.20007	0.507292	1.13352	3.71143	1.89777
CG1681	6.5	4.7	2L	4.77071	17.8072	1.02431	1.68926	1.45303	0.765933	422.834	391.356	429.54	641.195
CG16812	6.6	8.6	2L	11.3076	7.01959	2.91642	3.51976	16.836	29.9451	35.6623	29.2296	35.4875	37.1105
CG16817	6.2	8.6	3R	117.677	52.5164	69.4546	73.8572	359.539	241.091	887.792	567.855	682.549	699.065
CG16820	5.4	6.8	2L	0.351586	5.61501	2.10916	2.27492	0.0376816	0.917333	0.591197	0.622701	0.729247	2.24664
CG16833	5.6	8.2	U	10.2657	18.7537	3.6581	5.22865	22.9467	40.524	23.4113	13.5443	24.0474	23.2134
CG16838	6.7	4.4	3L	19.5185	0.773309	1.08952	0.748406	64.0289	1.08327	9.64106	4.48638	6.48835	5.80584
CG16853	5.8	8.9	2L	0.00793272	16.2329	0	0	0	29.7129	0	14.3964	257.271	123.477
CG16854	6.6	8.8	2L	0.126006	3.16774	3.60498	5.97596	0	13.3416	0.958053	0.881626	8.50557	8.8141
CG16857	6.4	8.7	2L	1.53701	7.56087	18.1249	27.7741	0.138478	0.632313	40.3787	48.3165	172.852	168.666
CG16865	6.5	8.9	2L	7.77447	2.55375	4.05175	5.82441	26.5987	17.6536	139.632	145.923	145.483	189.187
CG16868	6.7	9.1	2R	13.3849	3.00502	1.73529	2.01682	22.2292	2.18476	13.0793	9.34332	16.5884	17.2338
CG16879	5.7	9.2	2L	0.00581999	0.0488832	0.0210109	0.0988726	0	0	0.06258	0.112917	0.133871	0.351645
CG1688	6.4	8.5	2R	0.382405	0.811163	0.700982	1.04633	0	0.0730841	11.0263	7.70924	18.3789	14.5744
CG16884	6.8	9.2	2L	0.119281	0.462327	0.228341	0.876128	0.096007	0.349068	585.623	361.735	719.108	392.996
CG16885	6.2	9.1	2L	0.323074	0.918603	7.78927	7.44395	0.0782727	0.26001	564.407	352.602	606.976	326.637
CG16886	6.2	9.1	2L	0.0367428	0.204881	3.84063	5.20331	0.327698	0.183953	4.28283	3.01266	9.97057	5.80933
CG16890	6.4	8.5	2L	11.8619	5.66324	3.52553	7.35136	14.1208	17.0878	203.244	191.833	217.982	215.743
CG16903	6.5	4.6	X	23.2916	12.3698	8.73456	9.74953	34.3031	35.1468	15.63	8.26651	11.1689	14.1083
CG16908	6.6	8.8	3R	5.91461	1.51576	0.766663	0.85542	4.76484	0.120114	22.6248	17.8546	32.3706	36.1771
CG16912	6.7	8.4	2R	8.01269	3.11567	2.33804	3.21213	9.45621	4.43797	26.2786	17.982	15.4173	17.0699
CG16935	7	10	2R	14.395	18.916	6.11176	7.67875	7.79576	30.3453	39.6499	37.9746	32.8055	34.9441
CG16936	6.2	8.9	2R	33.5206	96.2212	216.153	257.24	43.2147	130.609	359.221	383.736	267.514	249.213
CG16940	6.7	4.4	3L	16.4707	10.6457	6.12049	8.00602	40.2171	15.4963	11.4523	9.45074	16.8115	16.5977
CG16941	6.6	8.8	3R	14.6288	5.31851	5.86178	7.7045	29.2597	10.2254	29.6405	22.7913	40.4534	39.0493
CG16947	5.3	7.7	2L	1.02254	0.998675	1.78566	2.45916	0.74015	0.135063	10.941	21.3973	17.5995	20.7071
CG1695	6.8	5	X	0.32485	2.64134	4.1108	8.32889	0.0238179	0.252327	4.37561	5.23412	47.7359	48.0059
CG16952	6	4.8	X	10.4688	4.72302	8.51696	11.4546	17.3602	2.33178	11.7082	10.687	41.4606	41.3262
CG16953	6.1	8.6	3R	21.298	21.3242	98.352	79.3458	33.2094	27.1037	91.7164	96.492	216.684	260.446
CG16965	6.2	8.3	2L	2.30228	2.92545	1.09631	1.94771	0.0240723	0.0640564	38.1929	31.3202	5.30602	5.73011
CG16972	5.9	9.6	2L	6.54641	60.2411	2.15507	3.89811	16.7592	128.271	15.1514	8.26995	18.7147	16.1755
CG16974	6.5	8.9	2L	19.1882	12.698	22.0958	34.2318	37.3301	4.60103	95.4312	114.154	224.49	278.09
CG16979	6.5	4.8	3L	9.57046	30.0291	1.81084	3.39956	8.51845	80.6249	101.517	74.857	102.198	110.348
CG1698	6.7	8.6	2R	3.08919	3.57836	0.178397	0.386537	0.128475	5.34457	6.77477	4.80136	5.6161	6.47127
CG16985	6.3	4.7	3L	7.59428	11.6003	0.951248	4.13386	2.48448	4.15966	157.821	118.248	145.491	93.7584
CG16989	7.1	5	X	12.8116	12.3234	7.21489	9.38957	16.7266	16.5113	31.6956	21.2089	71.063	62.314
CG17002	6.3	8.5	2R	7.49142	3.7824	2.05464	4.49251	13.199	7.86092	31.9812	14.1708	22.1575	10.9275
CG17005	6.8	4.9	X	0.035938	10.9711	0.104002	0.168558	0	46.8143	0	0	7.40953	6.88063
CG17018	6.2	8.4	2L	5.03342	0.150519	0.0407934	0.0294864	15.3718	0.111816	21.6915	0.128207	0.344632	0.37582
CG17019	6.6	9	2R	16.2825	5.41039	6.07741	6.63982	24.9027	2.7754	19.219	18.2407	32.788	39.5526
CG1702	6	4.5	X	9.99556	8.75821	0.739961	1.35564	8.46904	0.326247	64.9378	88.3737	40.9009	52.3102
CG1703	6.3	4.7	X	41.9582	11.9372	16.366	17.8721	71.5754	38.3244	24.9714	18.3924	25.5909	25.4176
CG17036	6.4	8.8	2L	4.36228	3.74754	0.0871449	0.459475	4.8204	3.11478	8.38226	6.73162	6.31078	5.99796
CG17059	6.7	9.1	2R	11.5767	8.82964	8.17889	18.4427	13.0552	10.0198	464.778	522.142	293.243	484.411
CG17065	6.5	4.5	X	5.92481	13.1056	8.20664	10.6469	4.10711	24.61	17.1197	19.4441	10.2248	12.0745
CG1707	4.8	6.5	2R	22.2588	12.2477	5.67851	4.77028	16.8037	9.36105	27.4895	15.4822	17.0517	21.48
CG17075	7	9.2	2L	0.179443	1.34094	2.76081	6.28813	0.0560957	0.44561	9.74966	7.8773	45.9688	46.7542
CG17082	5.8	8.2	2R	3.69709	0.917488	4.35779	5.76063	23.7644	0.771623	53.8127	56.2344	85.6093	122.499
CG17083	6.1	8.1	3R	0.0176424	40.3605	0	0.0153905	0	79.7203	1.35535	1.05862	4.52532	3.09768
CG17111	6.6	9	3R	1.94574	7.5827	7.6587	10.3221	0.115738	2.17471	37.5166	27.1102	49.9669	53.3819
CG17118	6.8	8.9	2L	0.359906	32.698	0.366451	1.19218	1.67619	109.79	0	0	0	0.296282
CG17119	6.4	8.5	3R	3.80673	3.96119	0.737062	1.14589	5.17901	10.8815	66.7177	60.4853	49.6476	89.1153
CG17121	5.5	7.7	3R	1.1082	5.95639	2.14861	2.31887	0.460306	3.54754	63.1931	54.1213	99.21	113.997
CG17122	6.9	7.3	3L	0.017634	23.5756	0.394057	0.402519	0.0169812	151.925	0	0	0	0
CG17124	5.9	7.9	2L	0.867038	1.89003	5.38984	8.62396	0.364552	2.40862	26.2761	28.2212	59.8895	63.7813
CG17127	5.9	7.8	2L	0.599742	2.27545	1.18887	0.679508	0.382811	0	2.5689	0.52489	18.2816	10.7525
CG17141	6.4	8.7	3R	5.60063	4.50312	2.66194	2.79108	4.0831	17.5971	12.6784	9.34485	7.31195	10.8929
CG17150	6	4.3	3L	0.00299542	2.87042	0.00159001	0.0056244	0	7.03392	0.051768	0.077352	0.273902	0.206998
CG17162	7.4	5.1	X	4.93839	1.60244	21.3518	20.487	18.5781	47.9056	463.873	444.477	1283.46	1815.61
CG17167	6.9	4.8	X	0.707874	0.574756	0.348242	24.7839	5.60801	1.68866	27.4925	27.8143	2.88023	4.06961
CG17168	6.8	5.1	X	21.457	5.37177	16.3258	15.4273	39.5622	3.25166	49.6675	44.9476	31.0673	41.3695
CG1718	6.3	4.6	X	3.01119	2.99101	2.59103	4.38611	6.10282	0.868262	81.243	86.3137	17.2492	18.3479
CG17180	6.2	4.3	3L	2.75205	5.58079	8.40032	9.97509	3.05928	13.7454	35.622	38.1538	49.2508	64.1885
CG17181	6.1	3.8	3L	0.234894	1.47377	2.49293	3.66091	0.0211774	0.570932	10.9289	10.9473	13.7094	15.0063
CG17184	6.4	9.6	3R	10.8456	8.52451	3.83533	7.5574	19.9972	8.54293	13.1701	10.0324	38.4861	53.499
CG17187	7	10	3R	5.38696	2.00224	2.35724	4.27771	12.2038	2.8389	26.444	24.0797	22.4706	23.8436
CG17209	6.3	4.7	X	11.2362	7.46773	0.441841	0.810277	6.80538	0.885741	8.69386	4.36551	7.57296	6.67039
CG17211	5.9	8.1	2L	0.0666591	0.337369	6.90582	7.63155	0.00318909	0.0679841	7.59119	5.16621	11.0394	6.59483
CG17219	6.2	8.9	2L	2.37584	0.562144	0.757536	0.74697	3.628	1.10271	70.436	44.3582	51.4091	52.9028
CG17221	5.7	6.4	2L	6.68529	7.3951	2.6097	4.25156	5.25654	8.71059	111.733	120.469	128.11	135.316
CG17230	6.4	9.3	3R	1.23915	6.43475	0.415764	0.524616	0.783624	17.4945	9.50483	4.2708	14.2165	13.5595
CG17233	5.8	4.3	3L	8.40575	3.03411	5.54922	7.64611	17.2917	1.13397	29.9353	18.0393	36.2798	19.9917
CG17239	5.9	8.7	2L	18.6467	0.135922	0.00416713	0	0.207064	0	1.62841	0.673156	0	0
CG17249	6.9	4.9	3L	5.33083	2.91566	5.51055	8.61582	26.668	12.5371	13.3558	7.74447	16.5368	11.7666
CG17258	6.5	9.1	2L	0.114101	4.39213	0.0261845	0.0849705	0.0350058	25.5286	7.62746	4.76268	6.79147	6.53042
CG17259	6.5	9.1	2L	59.3636	22.1339	22.8674	18.6795	78.142	37.4396	279.978	192.88	139.032	190.681
CG17260	6.5	9.1	2L	6.1405	11.7976	2.25491	3.75344	11.589	117.21	7.9919	6.12638	11.499	11.6547
CG17264	6.8	8.4	2L	0.54016	1.29506	0.621316	0.899321	0.0496101	1.37559	0.343113	0.030013	0.050403	0.102024
CG17265	5.5	8	2L	0.275033	0.237149	0.32407	0.431935	0.266273	0.426335	5.78837	5.11627	17.7931	12.6752
CG17266	6.7	9	2R	11.5667	4.60522	0.91619	1.75622	24.9957	34.3409	17.587	15.22	23.8034	33.8673
CG17270	6.3	8.1	3R	1.08375	0.779805	3.37506	5.30437	8.92499	0.0217822	7.08692	3.91258	46.6759	71.7046
CG17271	6.3	8.1	3R	19.856	16.2671	18.1008	16.4865	19.5325	6.9939	97.1851	74.1077	51.8862	41.5366
CG17272	6.3	8.1	3R	186.43	99.0243	0.664587	2.28785	4.82942	1.16592	121.259	99.9794	109.173	145.927
CG17273	6.3	8.1	3R	33.4072	22.8741	15.5543	13.4207	38.307	11.8877	150.518	173.204	136.647	161.608
CG17282	8.6	15	3R	14.3366	5.89181	2.47851	4.57989	19.4367	10.3592	32.7362	24.7658	18.3224	25.8996
CG17294	5.9	8.2	3R	3.13348	2.84657	3.45707	4.91928	5.75091	2.36445	41.9207	28.559	47.1348	45.4719
CG17304	5.3	7.2	3R	0.0809557	0.580495	0.545235	2.20902	0	0	3.85608	2.57701	24.272	17.9834
CG1732	7.3	4.7	4	0.626006	2.08842	3.2961	10.004	0.0418183	0.00761472	70.5038	112.24	723.814	765.021
CG17321	5.6	8.5	2L	0.123201	0.600848	7.68173	9.91599	0.00497828	0.0144633	6.76834	8.88029	61.5281	55.3875
CG17323	4.9	7.5	2L	4.29683	12.4077	1.18017	1.93995	0.539231	2.32327	228.429	204.837	111.151	131.754
CG17327	7	8.8	3R	27.4588	17.8162	4.73524	9.10734	14.9832	22.482	0	0	0	0
CG17328	6.4	4.7	3L	4.37272	1.20988	1.34688	1.65564	12.0663	2.71597	16.5169	13.4356	20.3446	18.7094
CG17331	6.4	8.8	2L	92.3272	36.5958	9.11742	15.0587	123.281	46.5057	274.065	243.135	185.318	201.065
CG17337	6.2	8.1	2R	41.4977	15.8327	11.4034	14.4965	62.2346	8.67328	242.84	188.864	98.0967	92.0498
CG17341	5.9	8.2	2L	0.0152103	0.0794328	0.36825	0.610074	0.000631999	0.00237221	4.09071	2.52966	19.4651	15.501
CG17349	5.4	7.6	2L	0	30.5783	0	0	0	62.3614	4.23091	2.86276	5.53619	6.2126
CG17350	6.2	8.9	2L	0.370756	2.70996	0.380142	0.83375	0	7.15224	34.7776	38.8378	19.4781	28.1114
CG17352	7	4.5	3L	2.38167	10.4078	35.3879	46.6997	0.548192	0.592851	37.7924	62.2141	454.202	603.807
CG17360	6	8.3	3R	5.47626	7.56692	10.7182	15.7482	13.9228	10.3451	11.4626	8.99553	36.5397	40.16
CG17364	6.4	4.4	3L	0.234565	1.35437	1.79512	3.19871	0.00107352	0.000118514	2.36232	2.90747	16.1927	18.5329
CG1737	6.4	4.4	X	28.5134	5.33761	4.49901	5.30885	38.4785	0.919883	11.0267	6.93652	11.1782	8.75549
CG17370	6.3	8.5	3R	6.44495	1.76128	2.58897	4.70581	9.68218	1.13293	32.4798	24.8945	82.3494	74.0106
CG17374	7.2	10	3L	5.31772	6.3455	0.0154589	0.191406	0.282729	0.127672	142.478	137.738	0.521016	0.448355
CG17377	6.3	8.9	2L	0	212.248	0	0.0255362	0	343.483	0	0	0	0.249092
CG17378	6.2	8.4	2L	13.0779	23.7019	2.22362	4.18389	0.00791219	29.134	7.3848	9.78802	62.0094	81.0561
CG1738	6.4	4.4	X	9.30345	2.13458	1.90379	3.5674	23.0801	9.02646	25.2014	19.1877	16.2785	24.9192
CG17385	6.5	8.7	2R	25.4985	14.0187	20.8318	24.4808	51.1493	44.8712	43.9808	40.868	38.2461	52.8778
CG17386	5.7	8.5	2R	0.134952	0.652474	7.75597	7.12061	0.0392694	0.0319825	8.93783	6.31693	39.2721	44.1124
CG17387	5.4	7.7	3R	0.0346092	18.7079	0.116038	0.197605	0.0427014	126.415	1.13085	1.48025	1.11166	1.51034
CG17404	5.5	9	3R	0	0.524432	0	0.185944	0	0.114572	0.133078	0.069689	0.113495	0
CG17450	6	4.2	X	0.0716136	36.2144	1.42277	2.43359	0.167685	376.283	4.68958	6.91644	1.09625	1.4862
CG17454	6.9	9.7	3L	8.44668	2.96903	21.229	25.9126	50.6636	5.28508	38.4141	27.8197	40.7997	54.32
CG1746	5.9	8.3	3R	231.251	172.593	270.583	324.076	319.293	61.0327	79459.6	81725.5	28854.8	26716.4
CG17471	7.2	4.9	4	2.70716	2.92429	3.46904	5.24383	6.09191	0.924699	133.946	109	267.584	256.268
CG17486	5.4	6.8	2R	11.8117	4.62852	8.03561	12.8871	38.0405	2.3771	11.8792	6.58479	10.8937	13.1583
CG1749	6.3	4.4	X	24.584	8.27397	4.08665	4.60472	33.7969	19.6443	46.936	27.4008	34.1595	27.2892
CG17493	6.8	8.9	2L	4.4945	1.42008	9.78087	14.6202	23.7666	3.85003	93.5546	91.5785	136.945	151.546
CG17494	6.8	9.5	2L	12.2584	11.4994	5.86639	7.29987	42.1476	29.8752	35.2265	32.6981	61.8236	68.0904
CG1750	5.5	7.9	3R	5.89648	2.55944	3.09746	3.60149	6.2267	2.87137	51.6814	48.2413	48.1182	55.8984
CG17508	5.7	8.3	2R	16.569	14.0283	24.2624	20.3219	22.7696	4.4905	242.205	322.886	164.061	287.085
CG17514	6.5	9.1	U	3.16522	0.585561	1.14665	1.90831	8.82155	0.163669	11.7654	8.90678	18.2778	17.3874
CG17528	7	9.2	U	7.16055	2.62601	4.42784	7.61511	17.353	4.83504	44.9001	41.0245	111.4	150.667
CG17544	6.7	9.4	2L	5.17129	11.5508	1.56952	3.16281	2.81613	5.43285	21.328	12.3524	28.614	20.9703
CG17564	5.9	4.2	U	0.0164287	37.4496	0.0967391	0.148462	0	211.141	0	0.469643	6.95218	4.20308
CG17565	6.5	8.9	3R	12.4133	8.97984	5.21251	5.33744	15.7923	27.6517	19.4319	14.5027	23.095	25.3671
CG17571	6.4	7.7	U	86.3657	123.23	0	0.155648	0.0157741	46.1319	1880.37	2943.97	0.624221	0.08007
CG17572	7.2	9.4	2L	0.178721	1.70397	2.82081	6.36133	0	0.988266	14.1478	20.0845	58.1664	37.4881
CG17593	6	9.5	2L	31.3934	19.238	7.27659	14.0518	46.1292	55.4774	172.348	109.738	109.546	139.212
CG17598	6.1	4.3	X	5.39924	2.57449	4.43203	6.51071	8.4274	1.03807	14.4301	15.452	44.3118	48.976
CG17599	6.1	4.3	X	0.0677055	0.146652	0.262935	0.357449	0.0946574	0.00390924	0.029657	0.370261	0.821552	0.814139
CG17600	6.3	4.6	X	2.46464	1.26289	0.606361	1.34031	2.33891	0.849805	32.3654	29.3165	43.1741	28.9789
CG17618	7	9.5	3R	4.10648	3.58635	21.5646	23.3999	16.2608	3.83148	353.368	608.863	343.367	699.311
CG17633	6.4	8.5	2L	165.945	246.403	0.0213391	0.0951233	0.0249422	35.785	1982.89	3467.18	0.732746	0
CG17639	6.9	9.6	3R	0.0629826	0.722993	0.0663566	0.101987	0.00728477	0.0613556	6.82136	7.43298	61.411	54.2976
CG1764	4.8	4.3	X	3.80946	2.33413	4.33095	7.73	9.64322	4.7106	14.4955	10.3899	26.919	25.4815
CG17646	6.1	7.9	2L	1.89617	4.07121	2.54056	5.64731	0.536107	0.42006	42.0024	80.9853	41.334	69.9498
CG17652	6.3	9.3	2L	3.68437	1.72959	2.99347	4.01804	8.74014	4.44642	38.0962	26.3783	24.2753	27.596
CG17660	6.9	8.5	2L	15.6523	12.4687	10.5055	14.1823	37.4235	23.1392	34.8776	29.8682	47.4537	57.0186
CG17669	6.8	9.4	2R	0.0200901	12.2849	0.0238363	0.0480372	0	80.2416	0.514374	0.467439	2.29604	2.23353
CG17672	6.4	4.8	3L	0.193712	0.331153	0.00268602	0.0146867	0.166324	0.780942	12.9356	4.27261	5.70331	6.42741
CG17680	6.3	9.2	2R	22.5229	12.5078	10.6259	10.4022	24.2424	3.55995	211.093	163.128	198.023	192.954
CG17683	6.3	8.7	U	15.714	6.15422	7.24609	11.7843	36.8808	2.49264	88.8977	71.9925	67.343	72.3152
CG17684	6.5	8.9	2R	0.0353304	0.0965167	9.06253	0.476043	3.66898	0.0202766	16.1447	25.5451	72.6708	69.2961
CG17687	6.8	8.9	3R	0.0295282	3.42089	0.178999	0.137663	0	6.63669	0.903853	0.57678	3.82171	3.24278
CG17691	6.1	9.1	2L	10.2011	5.92521	10.007	9.35331	13.8256	3.37632	168.239	207.688	110.78	120.265
CG17698	6.8	9.1	3L	2.42822	1.2145	7.3687	13.8777	10.7338	0.097312	20.0736	24.3048	52.8676	49.8822
CG17707	6.4	4.4	X	0.0928228	0.207266	0.31791	0.206879	0.0413323	2.25357	1.93535	0.736265	1.23308	1.58811
CG17712	6.6	8.6	2R	13.1081	5.90014	2.2431	3.55222	13.1059	13.67	20.3418	14.4901	36.6529	38.8396
CG17715	5.3	8.8	2L	2.05034	1.04957	2.18016	4.26885	4.5879	1.07051	52.1316	51.8966	167.583	113.28
CG17717	6.4	4.6	X	0.0769524	22.293	0.000630928	0.0980875	0.034642	33.8051	0.475058	0.508627	0.893461	0
CG17726	7	10	3R	11.486	9.32178	2.65829	3.09936	6.12736	7.13887	37.5724	30.4892	23.1666	26.4365
CG17737	5.4	4.1	3L	83.196	48.8882	52.3082	69.0387	132.045	124.56	497.692	641.412	343.414	397.684
CG17739	6.5	9.3	2R	3.84752	18.1312	44.0281	63.9699	0.240738	2.15091	16.3131	27.318	98.3992	112.054
CG17746	5.6	4.6	3L	22.3618	10.6699	3.98	5.21352	36.6617	11.9959	43.8864	29.8294	98.2089	110.475
CG17754	6.2	4.5	X	5.70756	7.63718	5.59677	7.70313	16.8297	21.9234	20.6344	16.8463	36.5768	37.087
CG17765	5.6	8.4	2R	18.9248	14.7094	20.9684	29.9545	61.7354	41.4687	64.2786	60.3692	119.977	159.772
CG17768	6.7	9.4	2L	12.4497	4.26954	2.58758	3.9553	11.5845	9.00499	484.801	478.588	366.362	382.611
CG17782	6.9	8.6	3R	0.00430645	0.00270603	0.0344126	0.0896736	0	0	0.529512	0.704176	0.653078	0.6932
CG17786	5.2	8.5	3R	0.60994	0.167666	0.0467676	0.260209	0.289322	0.0574658	12.2965	11.2266	11.7297	11.2048
CG17807	6.6	9.2	2R	7.04251	2.33574	3.42331	2.01946	7.13485	0.352066	17.8408	16.0987	14.7117	17.5634
CG17816	5.2	7.8	3R	0.508909	0.799473	6.90144	12.5038	0.851061	0.289309	8.48289	12.8469	88.1211	86.9141
CG17829	6.1	4.4	X	14.0939	2.29486	3.03072	3.85655	29.1965	3.8552	23.1936	13.5112	30.8448	35.2878
CG17834	6.3	8.9	2L	1.31839	0.955305	0.586573	0.577667	2.45675	0.716162	15.9067	17.6339	12.0356	10.2782
CG17838	4.6	7	3R	1.61922	7.63677	6.32759	9.07994	0.359884	15.5751	86.0408	92.3399	133.215	167.186
CG17839	6.8	4.2	3L	0.372227	1.74062	4.66403	6.87559	0.0512619	0.375057	24.3631	38.0194	91.7732	96.2836
CG17840	6.7	8.1	2L	4.04807	4.57087	1.63754	1.89285	2.54305	1.7327	14.3692	10.6223	19.0317	24.949
CG17841	6.7	4.6	X	6.25566	16.5833	32.833	27.0713	7.06823	8.49033	61.4481	61.6123	91.7162	100.784
CG1785	7	5.1	X	26.2482	4.91828	16.0857	11.8466	95.7501	21.4919	43.7081	24.1947	31.0035	23.5499
CG17883	8.3	11	2R	2.12175	0.616301	1.11576	1.05238	2.2031	0.318853	19.8506	15.3313	32.1467	32.6679
CG1789	6.5	4.5	X	16.1858	4.13565	24.2038	30.1085	89.5451	54.1508	45.1983	36.9902	25.1677	24.4813
CG17896	5.6	4.1	X	47.3731	42.1727	23.4956	23.9237	26.0369	17.3845	869.392	704.346	558.581	620.932
CG17904	6.4	9.3	2L	13.9567	8.60483	7.01012	7.2749	18.8466	22.1397	183.76	184.476	143.131	189.425
CG17912	6.4	9.3	2L	3.10803	2.78297	9.43132	13.0622	11.4181	2.78565	35.3565	35.2156	68.5989	69.8406
CG17919	6.5	8.6	3R	6.65557	20.9546	4.53937	10.6958	0.0790594	10.432	117.886	88.9769	112.153	128.482
CG17922	6.5	8.9	3R	2.79054	3.92299	12.6562	22.1338	1.94365	2.21879	8.95995	9.81592	58.4596	61.4234
CG17994	5.7	4.1	3L	0.0536484	0.324367	0.00656165	0.0591827	0.0158193	0.59045	0.623626	0.903168	0.747524	0.760609
CG17996	6	8.5	2L	10.1873	15.4412	17.678	24.7389	24.3592	70.546	318.913	267.714	152.741	146.895
CG18003	6.4	8.8	2R	4.64355	7.43751	11.8029	10.5559	2.15986	4.94155	68.3519	77.5046	61.5064	51.5461
CG18004	6.7	4.9	2R	8.88641	3.60367	2.38314	2.87118	18.198	4.32336	52.7287	43.2004	37.8557	43.4019
CG18005	6.5	8.9	3R	9.75163	6.94871	13.9801	22.6446	32.5874	33.7473	15.4985	11.496	25.0063	23.8163
CG18011	6.5	9.1	2R	2.93214	1.38523	0.305254	1.3637	5.20422	0.640691	21.4951	14.2432	20.6779	27.1675
CG18012	6.7	8.9	3R	19.1317	11.7765	5.59712	4.95701	20.6805	10.7233	35.0047	23.265	31.2754	43.7551
CG18048	6.5	8.6	3R	7.27794	1.24887	0.9781	2.90691	16.1227	3.70779	9.23348	9.20062	4.31834	8.36865
CG1806	6.2	4.4	X	0.938275	2.07279	2.96038	4.47991	0.471645	1.06227	34.4803	32.1025	45.5303	111.963
CG18065	6.1	7.9	2R	4.23552	3.06367	5.31032	9.72829	5.48109	0.677981	28.4357	25.9787	21.0096	35.9258
CG18081	7	4.7	3L	17.8749	6.57287	35.4737	27.8996	101.379	55.7077	272.078	220.015	289.253	290.349
CG1809	6.1	9.3	2R	7.01611	8.23063	0.0178321	0.116666	0	1.02137	66.362	100.323	5.26681	4.26421
CG1812	6.8	4.6	X	8.40859	4.06045	7.37778	8.8211	19.8786	9.06215	16.6443	10.9905	35.819	28.0102
CG18130	6.7	4.8	X	0.0226254	14.3414	0.0560886	0.141576	0.0188508	71.3284	2.50011	2.67035	8.80553	8.18828
CG18135	5.8	4.1	3L	19.3452	29.9177	12.5792	20.1909	17.8852	5.19167	96.9711	114.905	299.437	395.003
CG18136	6.7	4.6	3L	0.589901	2.8162	1.67898	1.13579	0	0.0544507	109.473	92.7351	35.2584	30.8367
CG1814	6.6	9.2	2R	4.36633	6.99227	10.2849	18.0613	4.22926	2.55233	113.369	114.08	111.987	110.876
CG1815	7.2	9.2	3R	7.42167	4.7578	6.23762	7.82583	19.3278	6.27803	12.6844	10.2362	14.1753	12.3826
CG18173	6.4	9.1	U	1.61163	6.28046	0	0	0	12.3601	14.2181	12.1502	12.079	12.0658
CG18190	6.4	4.1	2R	57.8601	4.72251	0.367859	0.0517833	113.975	8.51871	0	0	2.28395	1.04845
CG18208	5.9	8.4	3R	0.0483301	0.168881	0.305215	0.558512	0.0067856	0.0552956	1.966	2.46571	25.9633	18.1221
CG1824	6.8	9	X	12.7583	12.4252	3.25732	4.67966	5.72938	8.85423	64.8745	67.7579	53.8602	52.7244
CG1826	12	7.3	X	16.3866	16.6912	8.62102	9.64075	35.0266	34.1669	121.21	103.041	151.091	166.871
CG18262	6.5	4.4	X	5.75391	3.43463	2.16403	3.67296	8.34419	6.55244	4.95597	1.6306	8.27495	8.37285
CG18265	5.5	3.9	3L	0.0163277	0.124832	0.285479	0.833292	0.0020794	0	0.699944	0.748495	6.96019	6.12145
CG1827	6.6	9	2R	3.67095	18.2007	2.0402	5.81074	1.60565	67.2774	143.399	126.314	60.6145	97.2591
CG18273	6.1	4.7	X	11.3918	2.43944	2.18855	3.25293	15.5031	2.45317	15.7099	9.98749	24.1964	28.3082
CG18292	4.8	3.5	X	14.0307	4.15706	2.88225	4.53872	22.0346	2.40432	14.4135	15.5778	16.0693	16.6921
CG18304	6.6	9.3	2L	0.608976	5.02465	3.1811	2.98518	0.31267	2.43569	49.7818	55.0739	21.6988	15.4133
CG18317	6.9	8.5	2L	3.45688	7.27387	9.09229	9.99336	4.62895	1.8212	61.2332	61.8572	70.4882	91.3945
CG1832	6.7	9.5	2L	21.5931	11.1646	6.78877	9.18325	32.597	14.5503	62.9732	54.8624	78.9423	63.2633
CG18347	6.4	8.8	3R	14.5714	5.09196	3.22848	5.62058	18.6319	1.62875	119.2	132.452	364.201	510.596
CG18428	6.6	9.3	3R	4.79275	4.38626	11.2251	11.2246	6.51342	4.44097	138.625	157.973	66.9	90.885
CG18437	6.3	9.2	U	0.529291	3.9944	11.7172	20.4979	0.0101766	0.0628694	6.04236	6.3782	52.7776	41.4395
CG1847	6	4.4	X	8.99831	4.17665	3.40374	4.32827	10.4926	3.97728	27.075	17.1392	46.2043	31.2265
CG18472	6.4	9.1	3R	0.00457219	11.0678	0.0144661	0.0236489	0	48.2743	0.059564	0.062257	0.517288	0.353949
CG18473	6.9	9.4	U	1.54891	4.21174	0.140983	0.571961	0.115906	1.32024	99.2645	92.7154	125.435	135.5
CG18480	4.2	5.5	2L	1.93573	2.97993	0.00612608	0.0466898	0.277137	1.78325	26.7644	40.15	40.1168	65.1537
CG18507	5.6	7.7	2L	1.24316	4.36856	3.8417	4.21983	0.482521	2.47821	57.9593	73.4579	97.7702	108.121
CG18508	5.9	4.3	X	10.097	17.4124	14.0182	16.3697	24.198	32.1514	446.643	420.079	696.619	507.644
CG18528	6.6	9	3R	4.27977	0.691391	1.02644	1.32041	12.9851	3.45323	8.91988	8.44642	7.92723	12.319
CG18547	6.2	9.3	3R	6.45456	11.8395	4.52406	10.3797	4.05892	2.30595	64.8776	54.0036	45.2397	42.7895
CG18549	5.5	7.7	3R	4.70118	4.28711	3.837	6.89152	8.17836	3.80237	43.6709	47.1089	116.339	108.149
CG18585	6.6	7.9	2L	6.36213	9.44866	0.00522027	0.0179037	0	7.19514	8793.73	10257.4	1.05914	1.19737
CG18596	6.6	9.1	3R	5.85393	3.52979	1.19745	2.26476	13.2604	3.13777	72.0041	40.4092	128.763	134.522
CG18598	5.8	7.9	3R	45.1291	20.1093	1182.26	1040.19	690.317	320.623	171.166	371.708	1583.41	2123.16
CG18599	3.3	5.6	3R	0.152602	0.211476	0.473661	0.536426	0	0.109926	8.79435	6.51721	15.3054	19.691
CG18616	6.8	8.7	3R	8.38736	4.73361	2.49333	3.13215	10.9675	20.2782	19.3056	16.123	38.4484	45.5504
CG18619	6.5	8.7	2L	6.34939	10.0532	98.1457	85.4577	23.2342	43.7784	1034.24	1263.77	974.873	1261.37
CG18622	6.4	6.8	3R	0.883855	1.15636	2.10053	2.33762	0.567651	0.710689	423.387	338.59	433.263	631.619
CG18635	6.7	9.2	2R	0.501687	1.4453	0.0172552	0.0822243	0.00787575	0.350414	10.782	7.63192	1.55264	1.14862
CG18641	5.5	6.9	2L	0.00638537	29.7239	0.147865	0.0529012	0.00276098	67.3522	0.950911	0.250732	0.556392	0.414305
CG18643	6.2	9.2	3R	3.00684	1.85947	1.43458	2.14444	2.28697	0.305524	80.6722	61.2608	74.3019	88.2582
CG18659	6.5	8.6	2R	10.144	10.5204	7.72431	11.5731	18.7802	25.9437	18.5014	18.3233	38.2103	39.9026
CG18673	5.9	8.5	3R	0.0987935	2.11178	0.011482	0.0246122	0	16.8812	1.00376	2.11431	1.38365	0.687825
CG18675	6.6	7.6	3L	0.830072	4.27622	11.1587	14.5851	1.0891	30.829	0.423809	0.440015	1.06262	0.82156
CG18735	5.9	8	2R	0	0.0151229	0	0	0	0	0.472744	0.350979	0.93488	1.31926
CG18748	6.2	8.9	3R	1.51774	2.54049	0	0	0.0561014	0.429308	193.958	133.045	0	0
CG18766	6.2	8.8	3R	2.40082	4.24654	6.73419	8.49906	4.34499	4.11451	37.6601	31.3528	82.9847	95.9962
CG18769	6.5	5	3L	0.752038	0.838109	0.444031	0.805494	2.69372	0.618611	34.7635	17.0389	52.0932	30.3001
CG18789	6.5	8.6	2L	6.59867	8.23728	0.678821	2.1437	8.50013	9.40626	17.3041	13.9847	13.6864	14.2127
CG18809	6.4	4.6	X	7.01486	8.07204	16.5934	25.2058	15.4254	10.4141	100.311	115.192	75.6798	79.7168
CG18812	6.5	9.2	2R	4.28772	5.42984	22.1296	24.3309	12.438	2.25147	97.8935	98.6531	125.802	168.283
CG18815	6.5	4.6	3L	23.8237	28.4957	31.0162	55.63	36.5817	37.1041	139.463	118.14	244.59	344.082
CG1882	5.8	8.3	2R	20.8179	53.2591	13.7222	16.9049	15.0547	123.609	37.8988	38.3575	63.3937	84.1299
CG1885	6.5	4.6	X	6.70566	6.08484	0.803415	1.53459	5.44657	8.85746	295.771	228.668	94.2835	92.8337
CG1887	5.7	4.2	3L	0.518636	0.896942	0.588462	1.54338	0.0739468	0.230398	27.2681	15.4478	27.6426	16.9657
CG1890	6.6	8.8	3R	37.4591	15.2311	20.3046	30.468	234.216	330.468	251.709	233.041	389.923	360.547
CG1907	6.4	8.8	3R	27.4828	27.3964	25.5243	25.4075	18.9525	14.8571	118.058	250.062	139.662	154.807
CG1910	6.3	9.1	3R	23.042	8.20342	11.3597	16.2262	57.3958	5.33526	64.8819	42.4266	77.4543	69.4211
CG1942	6.9	9	2R	0.50096	0.722109	0.00909406	0.17193	0.0304349	0.0189398	42.9059	43.6027	44.9565	61.1184
CG1943	6.6	9.4	3R	40.8554	6.67912	30.5723	44.2842	210.622	25.3538	171.289	136.552	493.428	609.771
CG1951	17	23	3R	12.6911	3.5923	5.30898	8.97512	33.185	8.17144	27.9432	20.0845	49.6593	55.9091
CG1965	6.4	8.6	3R	5.8342	3.82856	8.54001	12.5347	9.8533	1.21162	33.9268	33.0036	56.6691	53.5979
CG1968	6.4	8.9	2R	10.2768	6.2717	2.24604	3.05157	11.8772	7.09612	48.5271	44.0572	50.2262	55.296
CG1969	6.4	8.4	3R	4.20113	4.21117	5.22916	5.67884	5.84585	4.45209	86.2787	78.4307	85.3532	77.1492
CG1970	6.5	8.7	2R	39.3943	57.2825	57.9493	81.404	39.8524	13.6473	726.789	979.752	402.1	431.357
CG1983	6.8	9	3R	8.37867	5.50144	10.9736	9.67105	10.2466	5.69725	68.9343	68.6536	50.5558	63.3238
CG1986	6.1	4.5	X	0	0.326981	0	0	0	0	1.33584	0	0.104731	0
CG1998	6.7	4.8	X	1.08621	5.1946	6.36051	10.0101	0.294942	5.62229	103.362	106.708	248.673	240.463
CG2004	6.6	4.8	X	18.522	9.70431	11.8821	19.2646	36.1808	19.8121	59.2548	39.7948	47.8595	49.263
CG2006	6.5	8.9	3R	16.5261	19.434	1.37898	1.34904	3.76309	11.14	27.1952	18.5697	28.9048	34.7689
CG2010	5.7	7.2	3R	1.89612	14.8809	4.02065	4.19891	0.0423834	0.218214	76.8304	74.8844	43.9408	42.2789
CG2016	6.9	8.9	3R	0.435084	1.75859	9.40884	12.5482	0.0152906	0.262702	6.62228	6.64421	17.3612	17.7776
CG2017	6.2	8.5	3R	5.47768	23.5845	10.6462	11.2978	1.98214	12.6914	46.9716	45.3241	143.647	183.663
CG2021	6.4	8.9	3L	21.3531	11.549	13.8766	16.2973	40.0403	35.018	206.901	212.909	163.539	162.448
CG2023	6.7	9	3R	3.12747	2.05423	1.40962	2.67662	12.1648	7.78148	34.739	26.0237	26.1631	41.2628
CG2025	7.3	4.8	X	12.3655	5.37071	4.49654	6.96782	26.1366	6.87728	23.0961	18.0856	36.7818	46.7699
CG2051	6.4	9.3	3R	20.5546	12.0022	0.989694	2.86136	31.9593	24.6579	47.1089	28.113	42.6574	48.5314
CG2059	6.4	4.4	X	5.69809	6.67081	4.12027	4.31231	10.0084	9.17912	54.0726	64.9505	33.4354	33.5108
CG2061	6.3	4.3	X	7.13287	21.2835	4.8714	7.68945	13.4229	39.8726	34.5006	25.9306	82.2682	93.6442
CG2063	6.4	8.9	2R	11.1899	4.74553	7.64352	10.2823	27.1236	13.8545	95.8661	75.76	99.9982	115.192
CG2076	6.3	4.3	X	29.084	52.0964	21.655	25.6136	25.1029	66.5925	820.742	848.977	778.691	957.912
CG2082	7.1	9.1	3R	2.75302	7.89699	16.3519	25.6471	0.274939	25.2173	789.132	868.377	625.311	710.231
CG2091	7.5	9.4	3R	10.7565	2.89598	2.44506	4.48375	22.986	4.21217	97.2831	56.9456	43.8627	63.823
CG2100	7.1	9.7	3R	12.6752	12.3562	1.95188	3.67939	22.3177	75.7134	76.6993	51.5295	55.7334	59.1934
CG2107	6.5	7.9	3L	11.3586	7.16773	4.39207	4.07691	8.47689	0.892253	175.285	230.701	123.923	186.396
CG2116	5.9	4.1	X	17.6878	5.64417	8.12481	9.1345	35.6144	6.95035	11.5069	10.494	24.4683	21.3294
CG2118	5.7	7.9	3R	16.9498	6.61195	1.54409	3.40625	18.4834	6.58027	105.051	118.096	70.6479	71.4353
CG2121	6.1	8	2R	0.160743	0.63805	0.40126	0.777619	0.00434152	0.0244269	89.2336	113.27	104.622	78.1183
CG2124	6.7	4.8	X	3.75045	4.5523	0.939536	1.77242	2.85902	2.19281	18.141	10.3262	18.9292	14.2739
CG2126	6.1	8.4	3R	8.26312	3.42238	1.30229	1.80761	8.13737	2.2876	27.0369	22.744	45.2259	54.5874
CG2129	6.5	4.4	X	8.49057	1.35073	0.631622	1.16833	13.7991	3.36418	5.67352	6.52787	11.1203	11.5166
CG2144	6.8	12	2R	6.06335	5.85218	3.20596	5.36929	15.3298	11.854	14.7675	11.9652	31.9412	35.99
CG2145	6.4	4.3	X	9.13365	22.349	108.685	134.827	0.44695	6.30793	101.068	102.013	138.079	112.044
CG2150	6.3	9.1	3R	0.0475464	0.0342849	0.0997397	0.14912	0.369056	2.68039	3.03283	2.35966	16.1854	7.21526
CG2162	6.5	4.5	3L	15.4778	7.64673	14.8183	17.0977	46.548	44.1668	38.4312	46.375	43.2491	48.6228
CG2177	6.9	4.6	4	8.51932	4.26344	8.15067	13.1487	12.7256	7.3176	155.816	153.47	205.265	255.232
CG2182	6.9	9.2	3R	33.9555	10.538	25.4191	34.2996	119.028	29.5055	53.7607	37.0015	39.8939	43.3166
CG2183	6.4	8.7	2R	14.4732	3.06244	2.57039	6.17987	23.2784	2.2729	12.6822	9.27881	19.0615	21.5732
CG2186	6.1	4.2	X	7.72314	3.23753	10.4455	16.2953	13.0389	2.20131	9.27768	9.19751	34.0404	24.8998
CG2200	6.2	4.3	X	13.1018	8.81144	3.15157	3.37275	7.822	6.04562	230.41	231.203	27.8475	25.0387
CG2201	6.4	9	2L	5.88306	4.5461	5.54884	8.09376	15.3805	2.82959	76.9858	78.2103	111.827	147.299
CG2202	6.6	4.2	X	11.3759	6.3556	3.05799	8.50406	22.4235	23.0875	9.92068	6.99535	16.4201	8.84714
CG2211	6.5	9.1	2R	11.8651	8.12143	0.644875	1.65654	7.63956	8.84876	92.3865	91.2221	119.1	136.485
CG2218	5.9	8	3R	24.7447	11.6914	4.98978	6.41505	34.3987	15.3383	41.8451	31.6497	52.0999	67.1169
CG2219	6.8	5	4	7.7526	2.34282	10.1547	17.6058	35.9038	4.77616	278.567	292.275	499.308	383.28
CG2224	5.6	7	3R	7.1638	15.5538	7.19413	8.99631	16.6126	56.2746	22.1969	19.0781	42.9969	55.4294
CG2225	6.3	8.7	2L	0.885041	1.89311	3.79097	5.57864	1.69814	4.74904	4.61018	4.99763	36.6775	29.7828
CG2246	6	8.2	3R	7.23337	3.52036	15.0699	17.9118	10.3975	1.904	160.415	162.715	431.759	465.652
CG2256	6.4	4.9	X	0.105	0.57941	0.1819	0.154573	0.00247408	0	6.34862	8.85777	4.33472	6.71738
CG2258	5.5	4.4	X	5.42131	3.01719	3.8385	5.67869	7.97212	3.52298	9.82153	8.62698	49.9557	46.1698
CG2260	6.5	4.6	X	14.8086	2.66026	3.48921	3.55924	17.79	5.16822	23.0547	13.3886	15.5451	21.5598
CG2263	6.6	4.4	X	38.3125	10.1249	7.39556	8.4598	38.9463	19.2426	39.7238	22.9796	29.075	25.4309
CG2269	6.7	9.2	2R	0.790116	11.0117	37.3807	64.1048	0.0290779	0.0617977	35.7058	41.314	234.836	183.133
CG2277	7.3	5	3L	9.30238	31.5832	3.33309	4.8749	11.5105	257.178	46.3337	53.3546	45.987	53.3535
CG2278	6.6	4.5	X	0.624648	1.52781	5.54932	7.47795	0.630029	0.65425	2.01414	2.71237	20.9661	20.0118
CG2292	7.1	9.6	2R	2.69714	4.91307	0.153086	0.634416	3.52515	5.10145	52.4897	50.0453	118.273	130.944
CG2310	6.5	8.9	3R	8.46547	2.8752	1.27584	1.25023	11.3023	1.60262	45.675	39.5746	61.7357	58.9399
CG2316	7.1	4.9	4	5.12274	2.71109	18.6489	24.3279	34.4348	5.7755	95.7841	83.937	128.635	143.714
CG2371	5.5	4	X	9.26101	3.51476	3.86421	6.16635	17.6378	14.3911	34.6198	31.7313	57.6897	52.0904
CG2453	6.6	4.5	X	9.03172	7.1118	3.99961	4.22653	14.5794	26.7526	56.4915	41.275	40.7142	42.5997
CG2469	6.7	9.4	2R	18.5954	9.0379	6.5178	10.6812	24.4171	9.2409	12.8028	10.2976	16.8338	15.9808
CG2519	6.9	9.4	3R	8.80722	4.59435	9.21277	12.0592	20.5928	2.49209	11.2802	9.93819	29.5567	35.8736
CG2540	6.6	8.7	3R	6.12274	4.07658	1.91868	2.51667	9.91751	1.85449	58.7072	52.9006	119.409	130.001
CG2543	6.5	4.7	X	1.09576	0.910407	0.991395	1.64913	1.39254	2.63753	30.1218	35.9872	43.1481	40.4587
CG2556	5.3	4.1	X	2.08184	1.55829	0.213262	0.350418	3.36744	0.753834	44.1268	41.0721	11.1569	14.0121
CG2574	5.6	7.4	X	0	18.9945	0.00644894	0.028356	0	145.573	1.33729	0.358613	3.52252	1.20734
CG2604	6.7	9.3	3R	36.543	62.5644	29.558	40.0573	35.0783	52.8706	97.8717	95.3533	84.4335	104.495
CG2608	6.7	4.6	X	13.8875	4.34567	4.8613	9.96428	26.7963	2.95216	20.734	22.2798	24.9773	22.8401
CG2614	5.8	8.2	2L	9.56304	1.92788	1.25217	1.93749	13.6993	0.870016	13.9942	11.5772	20.4457	22.2832
CG2656	6.2	8.7	3R	10.2321	5.23811	0.671521	1.22313	2.5633	2.42368	45.2637	30.6358	37.5312	35.3397
CG2658	7.1	5	X	18.4008	16.9633	3.33765	5.94553	18.2778	34.9193	90.1964	73.2092	85.3885	84.9808
CG2663	5.8	7.6	3R	0.0539471	7.03794	0.00478011	0	0	1.6543	3.13879	0.280615	0.578896	0.097751
CG2681	7.1	5.1	U	1.74681	4.54814	3.18465	5.30661	0.0191443	0.605995	62.0584	63.1668	199.186	200.069
CG2685	7.3	5	X	8.38505	3.62744	10.2297	12.983	32.1072	8.55014	16.4295	9.79485	17.3899	13.7429
CG2691	6.4	4.7	X	30.8796	4.52429	2.56007	4.16988	35.1304	5.03731	21.7209	15.0296	22.0796	29.1502
CG2698	4.7	9.1	3R	12.9972	14.6158	10.495	16.6358	19.093	12.7275	23.6412	19.728	57.8015	72.6044
CG2701	6.2	4.3	X	13.2485	12.2408	4.85439	6.03743	10.6182	17.6465	28.022	20.4972	46.4656	40.1577
CG2712	6.3	4.4	X	6.28937	1.91766	1.46142	1.6589	13.8955	6.19616	11.4863	6.90902	23.8057	26.2762
CG2747	7	9.2	3R	6.19703	3.71162	7.23295	14.9711	8.71783	1.15685	50.4947	53.6494	70.1319	77.8333
CG2765	6.6	8.8	2R	21.73	58.9799	12.1567	18.2061	22.5494	21.8383	126.098	140.359	173.009	232.935
CG2767	6.1	8.5	3R	9.77346	11.3396	18.6903	25.0128	10.9499	2.86136	23.4134	29.8097	106.781	131.163
CG2781	5.6	6.4	3R	1.81324	3.30957	3.46968	6.0158	0.437352	0.130193	75.9837	88.7539	91.4004	144.457
CG2789	7	4.7	U	57.4634	55.4495	22.8535	40.2475	76.2194	79.0053	402.9	282.752	349.269	362.043
CG2790	6.6	8.5	2R	8.28116	5.79343	8.69002	11.6903	23.3014	15.9738	24.3175	23.3672	23.3723	24.1936
CG2794	6.3	4.4	X	8.48326	14.1719	1.67749	1.39179	5.15988	42.4924	18.2918	11.871	18.3849	18.239
CG2807	6.7	4.7	X	14.7788	5.69297	5.98334	9.51034	22.3132	7.02081	17.6628	10.4609	21.6131	17.3724
CG2812	6.7	8.8	2R	1.90067	3.05829	1.85593	2.53095	0.627699	8.72305	22.9913	9.12991	12.53	10.7587
CG2818	5.8	8.1	2L	9.27956	4.27674	4.93122	5.74019	11.4511	3.27718	40.7376	38.7036	48.46	63.8537
CG2837	6.9	8.9	2L	0.110028	0.109433	0.0581707	0.37368	0.0355599	0.00529546	9.11218	9.47486	11.1065	5.99626
CG2839	6.2	8.4	2L	0.122648	0.565128	0.0642867	0.131168	0	1.18406	0.149012	0.55747	0	0
CG2846	6.9	9.1	3R	11.1757	11.4428	5.47227	11.7534	8.21886	4.0847	2652.43	2598.21	2600.46	2198.81
CG2852	6.2	7.5	2R	256.488	111.002	51.7747	62.7114	212.027	217.05	510.781	524.522	453.126	635.46
CG2862	6.4	4.6	X	62.1694	51.3747	4.85461	7.7339	17.2165	27.3742	885.235	628.769	385.421	477.14
CG2865	5.4	3.5	X	37.5057	1.90452	2.24887	3.97576	11.3935	6.88442	17.9446	19.0125	56.387	43.0741
CG2875	6.4	4.4	X	5.58618	0.489982	1.52777	2.04512	24.8112	0.386083	25.2457	26.2121	22.4473	35.3534
CG2889	6.3	4.4	X	6.78657	4.69026	2.21693	4.94431	4.44518	6.35799	58.8164	61.6405	16.7708	34.8492
CG2893	6.9	4.8	X	3.43547	0.856599	3.78911	5.76151	6.31773	0.743437	23.8225	28.1734	196.222	258.412
CG2906	7.2	8.4	2R	2.88285	1.33523	2.64628	3.79856	6.64806	1.78577	123.28	110.54	81.1963	108.237
CG2909	6.2	4.7	X	2.75414	3.13109	0.699297	0.90704	2.52488	6.55379	23.2918	21.1014	23.149	23.3251
CG2911	6.5	8.5	3R	4.408	1.40958	3.08049	3.48108	14.3275	5.51073	31.7844	43.6112	54.4991	89.8613
CG2915	7.2	8.4	2R	32.8611	14.158	6.29103	6.7478	46.6093	43.3064	74.0441	82.1541	29.9716	42.506
CG2918	6.4	4.4	X	36.5961	31.3812	30.3333	39.3027	72.1663	28.2019	51.3742	42.9375	50.3559	58.7162
CG2924	6.1	4.3	X	21.608	3.05802	14.1046	18.5436	122.244	1.62675	58.8957	40.2414	106.899	122.257
CG2926	6	8.6	3R	18.211	6.81496	9.82768	13.7759	68.7543	12.2573	16.4091	13.6407	29.1837	27.4313
CG2930	6.1	4.6	X	5.58422	10.989	0.506123	0.714398	0.0973769	10.5334	147.591	161.494	9.85723	18.5121
CG2931	6	8.1	3R	12.6819	11.8236	3.42426	6.59588	24.9741	34.4906	41.1714	22.9894	20.7165	15.4732
CG2938	5.8	4.4	X	14.9407	3.20725	2.26894	2.40383	19.7248	0.389954	8.55832	6.01631	14.3847	13.8773
CG2943	6.5	8.4	3R	29.9873	30.1181	7.52886	12.3985	29.3319	36.7504	28.9991	25.0924	45.9843	60.2597
CG2950	6.5	8.8	2L	9.80964	16.7846	20.1063	27.7118	28.5643	43.1381	128.022	111.865	132.494	150.223
CG2964	6.2	8.5	3R	0.00172909	43.5952	0.0220096	0.0584059	0	235.992	5.23654	2.41172	9.21445	7.25346
CG2970	6.2	7.5	2R	8.83919	20.9655	1.57277	2.09057	4.69233	48.5798	63.4627	43.8316	44.1905	53.1145
CG2972	6.5	4.5	X	26.116	5.667	5.4273	6.67936	38.251	10.5918	26.3414	13.278	17.6853	22.187
CG2974	6.5	4.5	X	6.56277	3.54761	2.03379	3.29448	11.4319	7.58812	51.6024	45.5433	48.5455	50.1919
CG2976	7.3	9	2L	21.3307	15.3557	5.30168	8.06366	30.5939	77.3546	127.121	124.884	42.6121	51.5313
CG2982	6.2	4.4	X	63.7344	6.83901	3.18281	3.07877	86.0036	10.6106	23.3323	8.37778	12.5611	16.0055
CG2990	6.5	4.7	2R	6.31131	0.156381	0.039605	0.0137402	13.4729	0.330258	7.69909	2.70121	2.9911	7.48027
CG2991	6.2	8.4	2L	3.47639	4.96013	6.30106	10.469	7.44569	0.849194	95.0135	109.888	196.051	244.672
CG2993	6.1	8.2	3R	3.50443	5.83714	26.0704	40.5832	1.20755	0.26243	1.77614	2.17975	10.9981	11.5488
CG30000	7.8	9.6	2R	14.8646	7.60237	3.78726	5.09183	18.7933	15.672	54.3248	61.3889	25.2829	37.4213
CG30010	6.3	8.8	2R	3.62098	2.05055	1.98997	3.38457	3.52037	0.17333	21.9329	39.823	11.4738	26.1333
CG30015	6.7	9.4	2R	0.648971	5.71202	2.66766	3.42771	0.271898	14.174	26.2882	27.0168	73.1351	73.1562
CG30026	6.7	4.5	2R	2.96976	5.35091	155.633	151.395	5.26582	55.6314	970.651	1154.61	201.528	239.508
[truncated: 5,969 more rows]

## Sheet: G.morsitans_Newly_emerged
gene	Fcov	Mcov	chrom	DFbody	DMbody	DFhead	DMhead	DOvary	Dtestis	Fbody	Mbody	Fhead	Mhead
[truncated: 7,724 more rows]

[truncated: 5 more sheets: L.trifolii, M.destructor, P.variegata, T.dalmanni, T.minor]
